# Supplementary material for: Whole-Soil Proteogenomics Uncover Hidden Microbial Strategies for Carbon Cycling Across the Soil Profile Under Deep Soil Warming
Source: Research Square preprint supplement (doi:10.21203/rs.3.rs-7993478/v1), 2025-11-12
Supplement: Supplementary file 1 [file 1daf0b8f10afd0bce9b64a6b.docx]

**Supplementary Figures and Tables Legends**

**Supplementary Figure 1.** Sample level metagenomic sequencing effort (A), read representativeness as percent mapped reads (B), and the resulting reconstructed genomes stratified by depth, year, and plot type.

**Supplementary Figure 2. Maximum likelihood phylogenetic tree of all high and medium quality genomes with mean abundance (control plots), depth and warming treatment response.** Phylogenetic tree was constructed with a concatenated alignment of 15 co-located ribosomal proteins (L2, L3, L4, L5, L6, L14, L15, L16, L18, L22, L24, S3, S8, S17 and S19). Concentric rings from the tree shows if the genome’s abundance was significantly different across depth and treatment for comparisons shown in the legend. The direction of significant response (increase/decrease with depth/warming treatment) is shown with red/blue color. The outermost ring shows the mean relative abundance across all control plots. The clades are colored based on the assigned GTDB taxonomy at phylum/class level.

**Supplementary Figure 3. MAG response to depth across years of warming treatment from control plots.** The figure shows the richness (number of MAGs) and diversity (phylum association) of MAGs significantly differing across the depth profile across years broken down by the pattern of the response (red: increase with depth, blue: decrease with depth).

**Supplementary Figure 4. MAG response to warming treatment across years of warming treatment.** The figure shows the richness (number of MAGs) and diversity (phylum association) of MAGs significantly differing between control and warming plots across years broken down by the pattern of the response (red: increase with warming, blue: decrease with warming) across years.

**Supplementary Figure 5. Rank abundance curves of rpsC species groups and their binning status.** Each bar corresponds to a species group colored by the class level lineage. The main rank abundance curves show the ranks up to 25% percentile, the inset shows the full distribution together with the binning status (red tick marks underneath x-axis) corresponding to the species group.

**Supplementary Figure 6. Class level distribution of genome recovery for species groups and overall representativeness of the bins.** Each bar shows the species groups associated with a specific class, colored by binning status and bin quality. Inset pie charts shows the breakdown of species groups associated with a bin (red) based on coverage weighted counts.

**Supplementary Figure 7. Metagenome-centric protein identification workflow.**

**Supplementary Table 1. Sample metadata.** Metagenome samples analyzed in this study (n = 95 independent samples).

**Supplementary Table 2. Metagenome metadata and sequencing statistics.** Metagenome metadata, accession ids and statistics (sequencing effort per sample). 101 metagenomes from 95 samples were generated. For samples with multiple metagenomes generated, the corresponding information is separated by commas.​​

**Supplementary Table 3. Metaproteome raw (EMSL database) and processed (MassIVE database) data accession ids**

**Supplementary Table 4. Metagenome assembly and coassembly statistics.** Assembly statistics for 101 metagenome assemblies and 14 metagenome co-assemblies (115 total assemblies.

**Supplementary Table 5. rpsC sequences and cluster information.** The table lists identified rpsC gene ids (n=12069) across all assemblies, their 99% sequence identity cluster membership, the scaffold ids and their lengths. The gene ids for the centroids are specified in the column “rpsC-gene-id_centroid”.

**Supplementary Table 6. rpsC species groups identified across all metagenome assemblies and their class level lineage.** The table lists the species groups as defined by rpsC clusters (n=3533) detailed in Supp. Table 5 and indexed by the gene-id for the centroid. 3 non-prokaryotic clusters were removed (rpsC_lf.cluster3429, rpsC_lf.cluster1061, rpsC_lf.cluster1736).

**Supplementary Table 7. Species group coverage of reads from each sample normalized by sequencing yield per sample.** For each species group, the normalized per base pair read coverage for the longest scaffold representing the species group cluster across samples. Normalized coverage for each species group from a sample was calculated as follows: (mean coverage of the scaffold/sequencing depth in bp*10E8)

**Supplementary Table 8. All dereplicated bins with completeness > 50, contamination < 25 and their mean coverage profiles across samples.** For each genome bin, the table lists the source metagenome assembly, GTDB taxonomic classification, completeness and contamination metrics, size and N50 length, followed by mean coverage across all samples.

**Supplementary Table 9. Genome bins associated with rpsC clusters.** Table linking rpsC clusters to MAGs for analysis of bin representativeness of the communities (see Supp. Figures 5 and 6)

**Supplementary Table 10. Permutational multivariate analysis of variance partitioning of weighted UniFrac distances for the microbial communities.** Microbial community structure was determined based on the rpsC based species clusters. The table is for permutational multivariate analysis of variance table from adonis2 using weighted phylogenetic distance (weighted UniFrac distance)  with the model “weighted_UniFracdist ~ depth * treatment”.

**Supplementary Table 11. Warming treatment and depth effect on MAG abundance - Linear mixed effect modeling results for testing for treatment and depth effects separately using normalized coverage.**

**Supplementary Table 12. Profiled traits through HMMs and HMM information (name, source, description, and KEGG cross reference when relevant).**

**Supplementary Table 13. Trait profiling of MAGs (presence/absence (1/0) or counts)**

**Supplementary Table 14. Community aggregated trait abundances based on MAG traits and MAG coverages.**

**Supplementary Table 15. Warming treatment and depth effect on community weighted traits.**

**Supplementary Table 16. Spectral counts for the proteins predicted from metagenomes**

**Supplementary Table 17. Normalized spectral abundance factors (NSAF) for the proteins predicted from metagenomes**

**Supplementary Table 18.**

**Supplementary Table 19. Detection of protein families across replicate plots.**
