# Supplementary material for: Whole-Soil Proteogenomics Uncover Hidden Microbial Strategies for Carbon Cycling Across the Soil Profile Under Deep Soil Warming
Source: Research Square preprint supplement (doi:10.21203/rs.3.rs-7993478/v1), 2025-11-12
Supplement: Supplementary file 2 [file 9d79455f92744ef813255979.xlsx]

## Sheet: index
Index for Supplementary Tables
SuppTable1	Sample metadata
SuppTable2	Metagenome metadata and sequencing statistics
SuppTable3	Metaproteome raw (EMSL) and processed (MassIVE) data accession ids
SuppTable4	Metagenome assembly and coassembly statistics
SuppTable5	rpsC sequences and cluster information
SuppTable6	rpsC species groups identified across all metagenome assemblies and their class level lineage
SuppTable7	Species group coverage of reads from each sample normalized by sequencing yield per sample
SuppTable8	All dereplicated bins with completeness > 50, contamination < 25 and their mean coverage profiles across samples
SuppTable9	Genome bins associated with rpsC clusters
SuppTable10	Permutational multivariate analysis of variance partitioning of weighted UniFrac distances for the microbial communities
SuppTable11	Warming treatment and depth effect on MAG abundance - Linear mixed effect modeling results for testing for treatment and depth effects separately using normalized coverage
SuppTable12	Profiled traits through HMMs and HMM information (name, source, description, and KEGG cross reference when relevant)
SuppTable13	Trait profiling of MAGs (presence/absence (1/0) or counts)
SuppTable14	Community aggregated trait abundances based on MAG traits and MAG coverages
SuppTable15	Warming treatment and depth effect on community weighted traits
SuppTable16	Spectral counts for the proteins predicted from metagenomes
SuppTable17	NSAF for the proteins predicted from metagenomes
SuppTable18	Total NSAF assigned to annotation categories
SuppTable19	Detection of protein families across replicate plots

## Sheet: SuppTable1
Supplementary Table 1. Sample metadata.
sample	sample_labid	plot	treatment	depth (cm)	sampling-date	warming treatment-length (years)	ncbi_biosample_latlong
soilwarming_1_control_10-20_062014	BWE201406031C1020	control1	control	10-20	20140603	0.5	38.91207 N,-120.6615 W
soilwarming_2_control_10-20_062014	BWE201406032C1020	control2	control	10-20	20140603	0.5	38.91222 N,-120.66122 W
soilwarming_3_control_10-20_062014	BWE201406033C1020	control3	control	10-20	20140603	0.5	38.91203 N,-120.66121 W
soilwarming_1_heated_10-20_062014	BWE201406031H1020	heated1	heated	10-20	20140603	0.5	38.91207 N,-120.6615 W
soilwarming_2_heated_10-20_062014	BWE201406032H1020	heated2	heated	10-20	20140603	0.5	38.91222 N,-120.66122 W
soilwarming_3_heated_10-20_062014	BWE201406033H1020	heated3	heated	10-20	20140603	0.5	38.91203 N,-120.66121 W
soilwarming_2_control_80-90_062014	BWE201406032C8090	control2	control	80-90	20140603	0.5	38.91222 N,-120.66122 W
soilwarming_3_control_80-90_062014	BWE201406033C8090	control3	control	80-90	20140603	0.5	38.91203 N,-120.66121 W
soilwarming_2_heated_80-90_062014	BWE201406032H8090	heated2	heated	80-90	20140603	0.5	38.91222 N,-120.66122 W
soilwarming_3_heated_80-90_062014	BWE201406033H8090	heated3	heated	80-90	20140603	0.5	38.91203 N,-120.66121 W
soilwarming_1_control_10-20_122014	BWE201412021C1020	control1	control	10-20	20141202	1	38.91207 N,-120.6615 W
soilwarming_2_control_10-20_122014	BWE201412022C1020	control2	control	10-20	20141202	1	38.91222 N,-120.66122 W
soilwarming_2_heated_10-20_122014	BWE201412022H1020	heated2	heated	10-20	20141202	1	38.91222 N,-120.66122 W
soilwarming_2_heated_50-60_122014	BWE201412022H5060	heated2	heated	50-60	20141202	1	38.91222 N,-120.66122 W
soilwarming_1_control_10-20_062015	BWE201506021C1020	control1	control	10-20	20150602	1.5	38.91207 N,-120.6615 W
soilwarming_2_control_10-20_062015	BWE201506022C1020	control2	control	10-20	20150602	1.5	38.91222 N,-120.66122 W
soilwarming_2_heated_10-20_062015	BWE201506022H1020	heated2	heated	10-20	20150602	1.5	38.91222 N,-120.66122 W
soilwarming_3_heated_10-20_062015	BWE201506023H1020	heated3	heated	10-20	20150602	1.5	38.91203 N,-120.66121 W
soilwarming_1_heated_50-60_062015	BWE201506021H5060	heated1	heated	50-60	20150602	1.5	38.91207 N,-120.6615 W
soilwarming_1_control_10-20_052016_S31	BWE201605171C1020	control1	control	10-20	20160517	2.5	38.91207 N,-120.6615 W
soilwarming_2_control_10-20_052016_S34	BWE201605172C1020	control2	control	10-20	20160517	2.5	38.91222 N,-120.66122 W
soilwarming_3_control_10-20_052016_S37	BWE201605173C1020	control3	control	10-20	20160517	2.5	38.91203 N,-120.66121 W
soilwarming_1_heated_10-20_052016_S40	BWE201605171H1020	heated1	heated	10-20	20160517	2.5	38.91207 N,-120.6615 W
soilwarming_2_heated_10-20_052016_S43	BWE201605172H1020	heated2	heated	10-20	20160517	2.5	38.91222 N,-120.66122 W
soilwarming_3_heated_10-20_052016_S46	BWE201605173H1020	heated3	heated	10-20	20160517	2.5	38.91203 N,-120.66121 W
soilwarming_1_control_50-60_052016_S32	BWE201605171C5060	control1	control	50-60	20160517	2.5	38.91207 N,-120.6615 W
soilwarming_2_control_50-60_052016_S35	BWE201605172C5060	control2	control	50-60	20160517	2.5	38.91222 N,-120.66122 W
soilwarming_3_control_50-60_052016_S38	BWE201605173C5060	control3	control	50-60	20160517	2.5	38.91203 N,-120.66121 W
soilwarming_1_heated_50-60_052016_S41	BWE201605171H5060	heated1	heated	50-60	20160517	2.5	38.91207 N,-120.6615 W
soilwarming_2_heated_50-60_052016_S44	BWE201605172H5060	heated2	heated	50-60	20160517	2.5	38.91222 N,-120.66122 W
soilwarming_3_heated_50-60_052016_S47	BWE201605173H5060	heated3	heated	50-60	20160517	2.5	38.91203 N,-120.66121 W
soilwarming_1_control_80-90_052016_S33	BWE201605171C8090	control1	control	80-90	20160517	2.5	38.91207 N,-120.6615 W
soilwarming_2_control_80-90_052016_S36	BWE201605172C8090	control2	control	80-90	20160517	2.5	38.91222 N,-120.66122 W
soilwarming_3_control_80-90_052016_S39	BWE201605173C8090	control3	control	80-90	20160517	2.5	38.91203 N,-120.66121 W
soilwarming_1_heated_80-90_052016_S42	BWE201605171H8090	heated1	heated	80-90	20160517	2.5	38.91207 N,-120.6615 W
soilwarming_2_heated_80-90_052016_S45	BWE201605172H8090	heated2	heated	80-90	20160517	2.5	38.91222 N,-120.66122 W
soilwarming_3_heated_80-90_052016_S48	BWE201605173H8090	heated3	heated	80-90	20160517	2.5	38.91203 N,-120.66121 W
soilwarming_1_control_0-10_052018_S1	BWE201806041C0010	control1	control	0-10	20180604	4.5	38.91207 N,-120.6615 W
soilwarming_2_control_0-10_052018_S6	BWE201806042C0010	control2	control	0-10	20180604	4.5	38.91222 N,-120.66122 W
soilwarming_3_control_0-10_052018_S11	BWE201806043C0010	control3	control	0-10	20180604	4.5	38.91203 N,-120.66121 W
soilwarming_1_heated_0-10_052018_S16	BWE201806041H0010	heated1	heated	0-10	20180604	4.5	38.91207 N,-120.6615 W
soilwarming_2_heated_0-10_052018_S21	BWE201806042H0010	heated2	heated	0-10	20180604	4.5	38.91222 N,-120.66122 W
soilwarming_3_heated_0-10_052018_S26	BWE201806043H0010	heated3	heated	0-10	20180604	4.5	38.91203 N,-120.66121 W
soilwarming_1_control_10-30_052018_S2	BWE201806041C1030	control1	control	10-30	20180604	4.5	38.91207 N,-120.6615 W
soilwarming_2_control_10-30_052018_S7	BWE201806042C1030	control2	control	10-30	20180604	4.5	38.91222 N,-120.66122 W
soilwarming_3_control_10-30_052018_S12	BWE201806043C1030	control3	control	10-30	20180604	4.5	38.91203 N,-120.66121 W
soilwarming_1_heated_10-30_052018_S17	BWE201806041H1030	heated1	heated	10-30	20180604	4.5	38.91207 N,-120.6615 W
soilwarming_2_heated_10-30_052018_S22	BWE201806042H1030	heated2	heated	10-30	20180604	4.5	38.91222 N,-120.66122 W
soilwarming_3_heated_10-30_052018_S27	BWE201806043H1030	heated3	heated	10-30	20180604	4.5	38.91203 N,-120.66121 W
soilwarming_1_control_30-45_052018_S3	BWE201806041C3045	control1	control	30-45	20180604	4.5	38.91207 N,-120.6615 W
soilwarming_2_control_30-45_052018_S8	BWE201806042C3045	control2	control	30-45	20180604	4.5	38.91222 N,-120.66122 W
soilwarming_3_control_30-45_052018_S13	BWE201806043C3045	control3	control	30-45	20180604	4.5	38.91203 N,-120.66121 W
soilwarming_1_heated_30-45_052018_S18	BWE201806041H3045	heated1	heated	30-45	20180604	4.5	38.91207 N,-120.6615 W
soilwarming_2_heated_30-45_052018_S23	BWE201806042H3045	heated2	heated	30-45	20180604	4.5	38.91222 N,-120.66122 W
soilwarming_3_heated_30-45_052018_S28	BWE201806043H3045	heated3	heated	30-45	20180604	4.5	38.91203 N,-120.66121 W
soilwarming_1_control_45-60_052018_S4	BWE201806041H4560	control1	control	45-60	20180604	4.5	38.91207 N,-120.6615 W
soilwarming_2_control_45-60_052018_S9	BWE201806042H4560	control2	control	45-60	20180604	4.5	38.91222 N,-120.66122 W
soilwarming_3_control_45-60_052018_S14	BWE201806043H4560	control3	control	45-60	20180604	4.5	38.91203 N,-120.66121 W
soilwarming_1_heated_45-60_052018_S19	BWE201806041C4560	heated1	heated	45-60	20180604	4.5	38.91207 N,-120.6615 W
soilwarming_2_heated_45-60_052018_S24	BWE201806042C4560	heated2	heated	45-60	20180604	4.5	38.91222 N,-120.66122 W
soilwarming_3_heated_45-60_052018_S29	BWE201806043C4560	heated3	heated	45-60	20180604	4.5	38.91203 N,-120.66121 W
soilwarming_1_control_60-80_052018_S5	BWE201806041C6080	control1	control	60-80	20180604	4.5	38.91207 N,-120.6615 W
soilwarming_2_control_60-80_052018_S10	BWE201806042C6080	control2	control	60-80	20180604	4.5	38.91222 N,-120.66122 W
soilwarming_3_control_60-80_052018_S15	BWE201806043C6080	control3	control	60-80	20180604	4.5	38.91203 N,-120.66121 W
soilwarming_1_heated_60-80_052018_S20	BWE201806041H6080	heated1	heated	60-80	20180604	4.5	38.91207 N,-120.6615 W
soilwarming_2_heated_60-80_052018_S25	BWE201806042H6080	heated2	heated	60-80	20180604	4.5	38.91222 N,-120.66122 W
soilwarming_3_heated_60-80_052018_S30	BWE201806043H6080	heated3	heated	60-80	20180604	4.5	38.91203 N,-120.66121 W
soilwarming_1_control_00-10_052021	BWE202105121C0010	control1	control	0-10	20210512	7.5	38.91207 N,-120.6615 W
soilwarming_2_control_00-10_052021	BWE202105122C0010	control2	control	0-10	20210512	7.5	38.91222 N,-120.66122 W
soilwarming_3_control_00-10_052021	BWE202105123C0010	control3	control	0-10	20210512	7.5	38.91203 N,-120.66121 W
soilwarming_1_heated_00-10_052021	BWE202105121H0010	heated1	heated	0-10	20210512	7.5	38.91207 N,-120.6615 W
soilwarming_2_heated_00-10_052021	BWE202105122H0010	heated2	heated	0-10	20210512	7.5	38.91222 N,-120.66122 W
soilwarming_3_heated_00-10_052021	BWE202105123H0010	heated3	heated	0-10	20210512	7.5	38.91203 N,-120.66121 W
soilwarming_1_control_10-30_052021	BWE202105121C1030	control1	control	10-30	20210512	7.5	38.91207 N,-120.6615 W
soilwarming_2_control_10-30_052021	BWE202105122C1030	control2	control	10-30	20210512	7.5	38.91222 N,-120.66122 W
soilwarming_3_control_10-30_052021	BWE202105123C1030	control3	control	10-30	20210512	7.5	38.91203 N,-120.66121 W
soilwarming_1_heated_10-30_052021	BWE202105121H1030	heated1	heated	10-30	20210512	7.5	38.91207 N,-120.6615 W
soilwarming_2_heated_10-30_052021	BWE202105122H1030	heated2	heated	10-30	20210512	7.5	38.91222 N,-120.66122 W
soilwarming_3_heated_10-30_052021	BWE202105123H1030	heated3	heated	10-30	20210512	7.5	38.91203 N,-120.66121 W
soilwarming_1_control_30-50_052021	BWE202105121C3050	control1	control	30-50	20210512	7.5	38.91207 N,-120.6615 W
soilwarming_2_control_30-50_052021	BWE202105122C3050	control2	control	30-50	20210512	7.5	38.91222 N,-120.66122 W
soilwarming_3_control_30-50_052021	BWE202105123C3050	control3	control	30-50	20210512	7.5	38.91203 N,-120.66121 W
soilwarming_1_heated_30-50_052021	BWE202105121H3050	heated1	heated	30-50	20210512	7.5	38.91207 N,-120.6615 W
soilwarming_2_heated_30-50_052021	BWE202105122H3050	heated2	heated	30-50	20210512	7.5	38.91222 N,-120.66122 W
soilwarming_3_heated_30-50_052021	BWE202105123H3050	heated3	heated	30-50	20210512	7.5	38.91203 N,-120.66121 W
soilwarming_1_control_50-70_052021	BWE202105121C5070	control1	control	50-70	20210512	7.5	38.91207 N,-120.6615 W
soilwarming_2_control_50-70_052021	BWE202105122C5070	control2	control	50-70	20210512	7.5	38.91222 N,-120.66122 W
soilwarming_3_control_50-70_052021	BWE202105123C5070	control3	control	50-70	20210512	7.5	38.91203 N,-120.66121 W
soilwarming_1_heated_50-70_052021	BWE202105121H5070	heated1	heated	50-70	20210512	7.5	38.91207 N,-120.6615 W
soilwarming_3_heated_50-70_052021	BWE202105123H5070	heated3	heated	50-70	20210512	7.5	38.91203 N,-120.66121 W
soilwarming_1_control_70-90_052021	BWE202105121C7090	control1	control	70-90	20210512	7.5	38.91207 N,-120.6615 W
soilwarming_2_control_70-90_052021	BWE202105122C7090	control2	control	70-90	20210512	7.5	38.91222 N,-120.66122 W
soilwarming_1_heated_70-90_052021	BWE202105121H7090	heated1	heated	70-90	20210512	7.5	38.91207 N,-120.6615 W
soilwarming_2_heated_70-80_052021	BWE202105122H7080	heated2	heated	70-90	20210512	7.5	38.91222 N,-120.66122 W
soilwarming_3_heated_70-90_052021	BWE202105123H7090	heated3	heated	70-90	20210512	7.5	38.91203 N,-120.66121 W

## Sheet: SuppTable2
Supplementary Table 2. Metagenome metadata and sequencing statistics
sample	sample-fastq-files	sequencing-center	GOLD Study/NCBI Bioproject ID	sequencing-platform	sequencing-yield (bp)	sequencing-yield (Gb)	GOLD-biosamples	GOLD-analysis_projects	IMG_TaxonIDs	Binning group
soilwarming_1_control_10-20_062014	52554.1.382511.TATCCTGC-GAACCGTT,52494.1.360256.TCAACTGG-TCAACTGG	Joint Genome Institute	Gs0151586	NovaSeq	32980395475	32.9804	Gb0279764,Gb0279710	Ga0480584,Ga0480438	3300044999,3300046661	5
soilwarming_1_heated_10-20_062014	52554.1.382511.TGGTCTTC-ATTTGCGG,52494.1.360256.CGTTGCAA-CGTTGCAA	Joint Genome Institute	Gs0151586	NovaSeq	42548535876	42.5485	Gb0279765,Gb0279713	Ga0480585,Ga0480441	3300044962,3300046693	2
soilwarming_2_control_10-20_062014	52554.1.382511.AACAGGCA-TACAGACC,52494.1.360256.TTCCAAGG-TTCCAAGG	Joint Genome Institute	Gs0151586	NovaSeq	44094297485	44.0943	Gb0279766,Gb0279716	Ga0480586,Ga0480444	3300045108,3300046666	3
soilwarming_2_control_80-90_062014	52770.4.448426.TCGGGTAT-TCGAAGAG	Joint Genome Institute	Gs0151586	NovaSeq	92483656698	92.4837	Gb0279718	Ga0480446	3300060340	3
soilwarming_2_heated_10-20_062014	52554.1.382511.CCATGGAT-TCGATCTC,52494.1.360256.CATGTTCC-CATGTTCC	Joint Genome Institute	Gs0151586	NovaSeq	36431468247	36.4315	Gb0279767,Gb0279719	Ga0480587,Ga0480447	3300044963,3300046695	4
soilwarming_2_heated_80-90_062014	52770.4.448426.GAAACACG-CTCAGAGT	Joint Genome Institute	Gs0151586	NovaSeq	74480327386	74.4803	Gb0279721	Ga0480449	3300059578	4
soilwarming_3_control_10-20_062014	52494.1.360256.AAGTCGAG-AAGTCGAG	Joint Genome Institute	Gs0151586	NovaSeq	23921056484	23.9211	Gb0279768	Ga0480588	3300045000	1
soilwarming_3_control_80-90_062014	52770.4.448426.GATACCGT-ACCAAACC	Joint Genome Institute	Gs0151586	NovaSeq	108006000000	108.006	Gb0279724	Ga0480452	3300059579	1
soilwarming_3_heated_10-20_062014	52554.1.382511.GGTAGTCT-GTTGCAGT,52494.1.360256.GGACTAGA-GGACTAGA	Joint Genome Institute	Gs0151586	NovaSeq	36374288284	36.3743	Gb0279769,Gb0279725	Ga0480590,Ga0480453	3300045109,3300046667	1
soilwarming_3_heated_80-90_062014	52757.4.441934.GATCTCTC-CACCACAA	Joint Genome Institute	Gs0151586	NovaSeq	199165000000	199.165	Gb0279727	Ga0480455	3300060357	1
soilwarming_1_control_10-20_122014	52636.4.404016.CATGGACT-CTGCATGA	Joint Genome Institute	Gs0151586	NovaSeq	54063692629	54.0637	Gb0279728	Ga0506675	3300053759	5
soilwarming_2_control_10-20_122014	52554.1.382511.GGAAAGTC-GGGTATAG	Joint Genome Institute	Gs0151586	NovaSeq	10083140778	10.0831	Gb0279734	Ga0480462	3300046669	3
soilwarming_2_heated_10-20_122014	52554.1.382511.TGGACCTA-GTTATCCC	Joint Genome Institute	Gs0151586	NovaSeq	7808902112	7.8089	Gb0279737	Ga0480465	3300046670	4
soilwarming_2_heated_50-60_122014	52554.1.382511.ACTCCTGT-AAAAGGGG	Joint Genome Institute	Gs0151586	NovaSeq	7748504351	7.7485	Gb0279732	Ga0480460	3300046668	2
soilwarming_1_control_10-20_062015	52554.1.382511.CTCAATGG-AACCTCAG	Joint Genome Institute	Gs0151586	NovaSeq	6332473459	6.33247	Gb0279746	Ga0480474	3300047514	5
soilwarming_1_heated_50-60_062015	52554.1.382511.GGTAGTTC-ACATCCTC	Joint Genome Institute	Gs0151586	NovaSeq	9072241195	9.07224	Gb0279750	Ga0480478	3300046728	2
soilwarming_2_control_10-20_062015	52554.1.382511.TGTTTGCC-TTACACGG	Joint Genome Institute	Gs0151586	NovaSeq	11256399306	11.2564	Gb0279752	Ga0480480	3300046729	3
soilwarming_2_heated_10-20_062015	52554.1.382511.TGGATCTG-CAAGGCTT	Joint Genome Institute	Gs0151586	NovaSeq	12586498452	12.5865	Gb0279755	Ga0480483	3300046671	4
soilwarming_3_heated_10-20_062015	52554.1.382511.GCCAGATT-GCTCATCT	Joint Genome Institute	Gs0151586	NovaSeq	13348526258	13.3485	Gb0279761	Ga0480489	3300046672	1
soilwarming_1_control_10-20_052016_S31	soilwarming_1_unheated_10-20_052016_S31.anqdpht.fastq.gz	UCSF Center for Advanced Technology	PRJNA1225762	NovaSeq	12149964994	12.15				8
soilwarming_1_control_50-60_052016_S32	soilwarming_1_unheated_50-60_052016_S32.anqdpht.fastq.gz	UCSF Center for Advanced Technology	PRJNA1225762	NovaSeq	21162164003	21.1622				8
soilwarming_1_control_80-90_052016_S33	soilwarming_1_unheated_80-90_052016_S33.anqdpht.fastq.gz	UCSF Center for Advanced Technology	PRJNA1225762	NovaSeq	13392485040	13.3925				8
soilwarming_1_heated_10-20_052016_S40	soilwarming_1_heated_10-20_052016_S40.anqdpht.fastq.gz	UCSF Center for Advanced Technology	PRJNA1225762	NovaSeq	16244589908	16.2446				9
soilwarming_1_heated_50-60_052016_S41	soilwarming_1_heated_50-60_052016_S41.anqdpht.fastq.gz	UCSF Center for Advanced Technology	PRJNA1225762	NovaSeq	17103777713	17.1038				9
soilwarming_1_heated_80-90_052016_S42	soilwarming_1_heated_80-90_052016_S42.anqdpht.fastq.gz	UCSF Center for Advanced Technology	PRJNA1225762	NovaSeq	13823576246	13.8236				9
soilwarming_2_control_10-20_052016_S34	soilwarming_2_unheated_10-20_052016_S34.anqdpht.fastq.gz	UCSF Center for Advanced Technology	PRJNA1225762	NovaSeq	15730363366	15.7304				8
soilwarming_2_control_50-60_052016_S35	soilwarming_2_unheated_50-60_052016_S35.anqdpht.fastq.gz	UCSF Center for Advanced Technology	PRJNA1225762	NovaSeq	13708670088	13.7087				8
soilwarming_2_control_80-90_052016_S36	soilwarming_2_unheated_80-90_052016_S36.anqdpht.fastq.gz	UCSF Center for Advanced Technology	PRJNA1225762	NovaSeq	12067444872	12.0674				8
soilwarming_2_heated_10-20_052016_S43	soilwarming_2_heated_10-20_052016_S43.anqdpht.fastq.gz	UCSF Center for Advanced Technology	PRJNA1225762	NovaSeq	22341387160	22.3414				9
soilwarming_2_heated_50-60_052016_S44	soilwarming_2_heated_50-60_052016_S44.anqdpht.fastq.gz	UCSF Center for Advanced Technology	PRJNA1225762	NovaSeq	15969198138	15.9692				9
soilwarming_2_heated_80-90_052016_S45	soilwarming_2_heated_80-90_052016_S45.anqdpht.fastq.gz	UCSF Center for Advanced Technology	PRJNA1225762	NovaSeq	16112338040	16.1123				9
soilwarming_3_control_10-20_052016_S37	soilwarming_3_unheated_10-20_052016_S37.anqdpht.fastq.gz	UCSF Center for Advanced Technology	PRJNA1225762	NovaSeq	16159230799	16.1592				8
soilwarming_3_control_50-60_052016_S38	soilwarming_3_unheated_50-60_052016_S38.anqdpht.fastq.gz	UCSF Center for Advanced Technology	PRJNA1225762	NovaSeq	13150592654	13.1506				8
soilwarming_3_control_80-90_052016_S39	soilwarming_3_unheated_80-90_052016_S39.anqdpht.fastq.gz	UCSF Center for Advanced Technology	PRJNA1225762	NovaSeq	15983967374	15.984				8
soilwarming_3_heated_10-20_052016_S46	soilwarming_3_heated_10-20_052016_S46.anqdpht.fastq.gz	UCSF Center for Advanced Technology	PRJNA1225762	NovaSeq	17869375167	17.8694				9
soilwarming_3_heated_50-60_052016_S47	soilwarming_3_heated_50-60_052016_S47.anqdpht.fastq.gz	UCSF Center for Advanced Technology	PRJNA1225762	NovaSeq	17058282083	17.0583				9
soilwarming_3_heated_80-90_052016_S48	soilwarming_3_heated_80-90_052016_S48.anqdpht.fastq.gz	UCSF Center for Advanced Technology	PRJNA1225762	NovaSeq	12740278726	12.7403				9
soilwarming_1_control_0-10_052018_S1	soilwarming_1_unheated_0-10_052018_S1.anqdpht.fastq.gz	UCSF Center for Advanced Technology	PRJEB39497	NovaSeq	16875627698	16.8756				6
soilwarming_1_control_10-30_052018_S2	soilwarming_1_unheated_10-30_052018_S2.anqdpht.fastq.gz	UCSF Center for Advanced Technology	PRJEB39497	NovaSeq	17376635366	17.3766				6
soilwarming_1_control_30-45_052018_S3	soilwarming_1_unheated_30-45_052018_S3.anqdpht.fastq.gz	UCSF Center for Advanced Technology	PRJEB39497	NovaSeq	19714429082	19.7144				6
soilwarming_1_heated_45-60_052018_S19	soilwarming_1_heated_45-60_052018_S19.anqdpht.fastq.gz	UCSF Center for Advanced Technology	PRJEB39497	NovaSeq	12751790098	12.7518				7
soilwarming_1_control_60-80_052018_S5	soilwarming_1_unheated_60-80_052018_S5.anqdpht.fastq.gz	UCSF Center for Advanced Technology	PRJEB39497	NovaSeq	16625565948	16.6256				6
soilwarming_1_heated_0-10_052018_S16	soilwarming_1_heated_0-10_052018_S16.anqdpht.fastq.gz	UCSF Center for Advanced Technology	PRJEB39497	NovaSeq	13817715519	13.8177				7
soilwarming_1_heated_10-30_052018_S17	soilwarming_1_heated_10-30_052018_S17.anqdpht.fastq.gz	UCSF Center for Advanced Technology	PRJEB39497	NovaSeq	13122523767	13.1225				7
soilwarming_1_heated_30-45_052018_S18	soilwarming_1_heated_30-45_052018_S18.anqdpht.fastq.gz	UCSF Center for Advanced Technology	PRJEB39497	NovaSeq	12289144151	12.2891				7
soilwarming_1_control_45-60_052018_S4	soilwarming_1_unheated_45-60_052018_S4.anqdpht.fastq.gz	UCSF Center for Advanced Technology	PRJEB39497	NovaSeq	17852729721	17.8527				6
soilwarming_1_heated_60-80_052018_S20	soilwarming_1_heated_60-80_052018_S20.anqdpht.fastq.gz	UCSF Center for Advanced Technology	PRJEB39497	NovaSeq	12036725558	12.0367				7
soilwarming_2_control_0-10_052018_S6	soilwarming_2_unheated_0-10_052018_S6.anqdpht.fastq.gz	UCSF Center for Advanced Technology	PRJEB39497	NovaSeq	21316708958	21.3167				6
soilwarming_2_control_10-30_052018_S7	soilwarming_2_unheated_10-30_052018_S7.anqdpht.fastq.gz	UCSF Center for Advanced Technology	PRJEB39497	NovaSeq	19546654660	19.5467				6
soilwarming_2_control_30-45_052018_S8	soilwarming_2_unheated_30-45_052018_S8.anqdpht.fastq.gz	UCSF Center for Advanced Technology	PRJEB39497	NovaSeq	23806456721	23.8065				6
soilwarming_2_heated_45-60_052018_S24	soilwarming_2_heated_45-60_052018_S24.anqdpht.fastq.gz	UCSF Center for Advanced Technology	PRJEB39497	NovaSeq	12184417839	12.1844				7
soilwarming_2_control_60-80_052018_S10	soilwarming_2_unheated_60-80_052018_S10.anqdpht.fastq.gz	UCSF Center for Advanced Technology	PRJEB39497	NovaSeq	12233874714	12.2339				6
soilwarming_2_heated_0-10_052018_S21	soilwarming_2_heated_0-10_052018_S21.anqdpht.fastq.gz	UCSF Center for Advanced Technology	PRJEB39497	NovaSeq	14032332257	14.0323				7
soilwarming_2_heated_10-30_052018_S22	soilwarming_2_heated_10-30_052018_S22.anqdpht.fastq.gz	UCSF Center for Advanced Technology	PRJEB39497	NovaSeq	12278872988	12.2789				7
soilwarming_2_heated_30-45_052018_S23	soilwarming_2_heated_30-45_052018_S23.anqdpht.fastq.gz	UCSF Center for Advanced Technology	PRJEB39497	NovaSeq	12907235292	12.9072				7
soilwarming_2_control_45-60_052018_S9	soilwarming_2_unheated_45-60_052018_S9.anqdpht.fastq.gz	UCSF Center for Advanced Technology	PRJEB39497	NovaSeq	25346513326	25.3465				6
soilwarming_2_heated_60-80_052018_S25	soilwarming_2_heated_60-80_052018_S25.anqdpht.fastq.gz	UCSF Center for Advanced Technology	PRJEB39497	NovaSeq	14387549758	14.3875				7
soilwarming_3_control_0-10_052018_S11	soilwarming_3_unheated_0-10_052018_S11.anqdpht.fastq.gz	UCSF Center for Advanced Technology	PRJEB39497	NovaSeq	15362297702	15.3623				6
soilwarming_3_control_10-30_052018_S12	soilwarming_3_unheated_10-30_052018_S12.anqdpht.fastq.gz	UCSF Center for Advanced Technology	PRJEB39497	NovaSeq	14042736708	14.0427				6
soilwarming_3_control_30-45_052018_S13	soilwarming_3_unheated_30-45_052018_S13.anqdpht.fastq.gz	UCSF Center for Advanced Technology	PRJEB39497	NovaSeq	14177734970	14.1777				6
soilwarming_3_heated_45-60_052018_S29	soilwarming_3_heated_45-60_052018_S29.anqdpht.fastq.gz	UCSF Center for Advanced Technology	PRJEB39497	NovaSeq	20653241227	20.6532				7
soilwarming_3_control_60-80_052018_S15	soilwarming_3_unheated_60-80_052018_S15.anqdpht.fastq.gz	UCSF Center for Advanced Technology	PRJEB39497	NovaSeq	13488867108	13.4889				6
soilwarming_3_heated_0-10_052018_S26	soilwarming_3_heated_0-10_052018_S26.anqdpht.fastq.gz	UCSF Center for Advanced Technology	PRJEB39497	NovaSeq	12182799142	12.1828				7
soilwarming_3_heated_10-30_052018_S27	soilwarming_3_heated_10-30_052018_S27.anqdpht.fastq.gz	UCSF Center for Advanced Technology	PRJEB39497	NovaSeq	11020639836	11.0206				7
soilwarming_3_heated_30-45_052018_S28	soilwarming_3_heated_30-45_052018_S28.anqdpht.fastq.gz	UCSF Center for Advanced Technology	PRJEB39497	NovaSeq	17372499897	17.3725				7
soilwarming_3_control_45-60_052018_S14	soilwarming_3_unheated_45-60_052018_S14.anqdpht.fastq.gz	UCSF Center for Advanced Technology	PRJEB39497	NovaSeq	14778161420	14.7782				6
soilwarming_3_heated_60-80_052018_S30	soilwarming_3_heated_60-80_052018_S30.anqdpht.fastq.gz	UCSF Center for Advanced Technology	PRJEB39497	NovaSeq	24901635105	24.9016				7
soilwarming_1_control_00-10_052021	52767.2.447909.GGACCTAT-GGACCTAT	Joint Genome Institute	Gs0151586	NovaSeq	76162571536	76.1626	Gb0343068	Ga0577615	3300060320	5
soilwarming_1_control_10-30_052021	52767.2.447909.CGATGCTT-CGATGCTT	Joint Genome Institute	Gs0151586	NovaSeq	77607623634	77.6076	Gb0343069	Ga0577616	3300060150	5
soilwarming_1_control_30-50_052021	52767.2.447909.TAGCCGAA-TAGCCGAA	Joint Genome Institute	Gs0151586	NovaSeq	63673795783	63.6738	Gb0343070	Ga0577617	3300059595	5
soilwarming_1_control_50-70_052021	52767.2.447909.GCTATCCT-GCTATCCT	Joint Genome Institute	Gs0151586	NovaSeq	72163000476	72.163	Gb0343071	Ga0577618	3300060321	5
soilwarming_1_control_70-90_052021	52784.1.450945.TAGAGGAC-ACCACAGT	Joint Genome Institute	Gs0151586	NovaSeq	235579000000	235.579	Gb0343072	Ga0577619	3300061690	5
soilwarming_1_heated_00-10_052021	52767.3.447926.ACGACTTG-ACGACTTG	Joint Genome Institute	Gs0151586	NovaSeq	63334222346	63.3342	Gb0343083	Ga0577630	3300060318	2
soilwarming_1_heated_10-30_052021	52767.3.447926.TGCTTCCA-TGCTTCCA	Joint Genome Institute	Gs0151586	NovaSeq	38842075308	38.8421	Gb0343084	Ga0577631	3300060313	2
soilwarming_1_heated_30-50_052021	52767.3.447926.GCATACAG-GCATACAG	Joint Genome Institute	Gs0151586	NovaSeq	47696787444	47.6968	Gb0343085	Ga0577632	3300060317	2
soilwarming_1_heated_50-70_052021	52767.3.447926.CTTCGTTC-CTTCGTTC	Joint Genome Institute	Gs0151586	NovaSeq	62893214597	62.8932	Gb0343086	Ga0577633	3300059597	2
soilwarming_1_heated_70-90_052021	52767.3.447926.TGCGAACT-TGCGAACT	Joint Genome Institute	Gs0151586	NovaSeq	69886874042	69.8869	Gb0343087	Ga0577634	3300060322	2
soilwarming_2_control_00-10_052021	52767.2.447909.CGCTAGTA-CGCTAGTA	Joint Genome Institute	Gs0151586	NovaSeq	40934284757	40.9343	Gb0343073	Ga0577620	3300059576	3
soilwarming_2_control_10-30_052021	52767.2.447909.TCCGTGAA-TCCGTGAA	Joint Genome Institute	Gs0151586	NovaSeq	47666642335	47.6666	Gb0343074	Ga0577621	3300059581	3
soilwarming_2_control_30-50_052021	52767.2.447909.CTGCACTT-CTGCACTT	Joint Genome Institute	Gs0151586	NovaSeq	41266383350	41.2664	Gb0343075	Ga0577622	3300059594	3
soilwarming_2_control_50-70_052021	52767.2.447909.TTGCGAAG-TTGCGAAG	Joint Genome Institute	Gs0151586	NovaSeq	49307957260	49.308	Gb0343076	Ga0577623	3300060314	3
soilwarming_2_control_70-90_052021	52767.2.447909.ACATAGGC-ACATAGGC	Joint Genome Institute	Gs0151586	NovaSeq	54689605165	54.6896	Gb0343077	Ga0577624	3300060015	3
soilwarming_2_heated_00-10_052021	52767.3.447926.CATCGTGA-CATCGTGA	Joint Genome Institute	Gs0151586	NovaSeq	65281126996	65.2811	Gb0343088	Ga0577635	3300060351	4
soilwarming_2_heated_10-30_052021	52767.3.447926.TCTCCGAT-TCTCCGAT	Joint Genome Institute	Gs0151586	NovaSeq	50844498479	50.8445	Gb0343089	Ga0577636	3300060352	4
soilwarming_2_heated_30-50_052021	52767.3.447926.AGAGTAGC-AGAGTAGC	Joint Genome Institute	Gs0151586	NovaSeq	39205460585	39.2055	Gb0343090	Ga0577637	3300059580	4
soilwarming_2_heated_70-80_052021	52786.1.451192.GCAAGATC-GCAAGATC	Joint Genome Institute	Gs0151586	NovaSeq	91683400400	91.6834	Gb0343091	Ga0577638	3300060355	4
soilwarming_3_control_00-10_052021	52767.2.447909.GTTGTAGC-GTTGTAGC	Joint Genome Institute	Gs0151586	NovaSeq	76797363299	76.7974	Gb0343078	Ga0577625	3300059598	1
soilwarming_3_control_10-30_052021	52767.2.447909.ACCACGAT-ACCACGAT	Joint Genome Institute	Gs0151586	NovaSeq	93416430040	93.4164	Gb0343079	Ga0577626	3300060323	1
soilwarming_3_control_30-50_052021	52767.3.447926.CTGAAGCT-CTGAAGCT	Joint Genome Institute	Gs0151586	NovaSeq	74419813018	74.4198	Gb0343080	Ga0577627	3300060149	1
soilwarming_3_control_50-70_052021	52767.3.447926.TCCTTAGC-TCCTTAGC	Joint Genome Institute	Gs0151586	NovaSeq	33402242493	33.4022	Gb0343081	Ga0577628	3300059577	1
soilwarming_3_heated_00-10_052021	52767.3.447926.CAACACCT-CAACACCT	Joint Genome Institute	Gs0151586	NovaSeq	77428332872	77.4283	Gb0343092	Ga0577639	3300060319	1
soilwarming_3_heated_10-30_052021	52767.3.447926.TTGTGTGC-TTGTGTGC	Joint Genome Institute	Gs0151586	NovaSeq	55175541125	55.1755	Gb0343093	Ga0577640	3300059582	1
soilwarming_3_heated_30-50_052021	52767.3.447926.ACTGCTAG-ACTGCTAG	Joint Genome Institute	Gs0151586	NovaSeq	59854954233	59.855	Gb0343094	Ga0577641	3300059596	1
soilwarming_3_heated_50-70_052021	52767.3.447926.GTCATCGA-GTCATCGA	Joint Genome Institute	Gs0151586	NovaSeq	52008623300	52.0086	Gb0343095	Ga0577642	3300060016	1
soilwarming_3_heated_70-90_052021	52757.4.441934.CAGTAGCT-AATCCCAG,52770.4.448426.TAGTCGTG-GCGATTGT	Joint Genome Institute	Gs0151586	NovaSeq	222000000000	222	Gb0343096,Gb0351230	Ga0577643,Ga0580224	3300060332,3300060315	1

## Sheet: SuppTable3
Supplementary Table 3. Metaproteome raw (EMSL) and processed (MassIVE) data accession ids
sample	metaproteome id in EMSL and MassIVE repositories
soilwarming_1_control_0-10_052018_S1	50964_Brodie_pool_18_1C_10_19_37_HFX_28May21_Wally_WBEH-20-08-04
soilwarming_1_control_10-30_052018_S2	50964_Brodie_pool_18_1C_30_20_22_HFX_28May21_Wally_WBEH-20-08-04
soilwarming_1_control_30-45_052018_S3	50964_Brodie_pool_18_1C_45_21_29_HFX_26May21_Wally_WBEH-20-08-04
soilwarming_1_heated_45-60_052018_S19	50964_Brodie_pool_18_1H_60_27_36_HFX_27May21_Wally_WBEH-20-08-04
soilwarming_1_control_60-80_052018_S5	50964_Brodie_pool_18_1C_80_23_43_HFX_25May21_Wally_WBEH-20-08-04
soilwarming_1_heated_0-10_052018_S16	50964_Brodie_pool_18_1H_10_24_38_HFX_28May21_Wally_WBEH-20-08-04
soilwarming_1_heated_10-30_052018_S17	50964_Brodie_pool_18_1H_30_25_47_HFX_28May21_Wally_WBEH-20-08-04
soilwarming_1_heated_30-45_052018_S18	50964_Brodie_pool_18_1H_45_26_19_HFX_26May21_Wally_WBEH-20-08-04
soilwarming_1_control_45-60_052018_S4	50964_Brodie_pool_18_1C_60_22_03_HFX_27May21_Wally_WBEH-20-08-04
soilwarming_1_heated_60-80_052018_S20	50964_Brodie_pool_18_1H_80_28_07_HFX_25May21_Wally_WBEH-20-08-04
soilwarming_2_control_0-10_052018_S6	50964_Brodie_pool_18_2C_10_29_31_HFX_27May21_Wally_WBEH-20-08-04
soilwarming_2_control_10-30_052018_S7	50964_Brodie_pool_18_2C_30_30_42_HFX_25May21_Wally_WBEH-20-08-04
soilwarming_2_control_30-45_052018_S8	50964_Brodie_pool_18_2C_45_31_13_HFX_28May21_Wally_WBEH-20-08-04
soilwarming_2_heated_45-60_052018_S24	50964_Brodie_pool_18_2H_60_37_40_HFX_26May21_Wally_WBEH-20-08-04
soilwarming_2_control_60-80_052018_S10	50964_Brodie_pool_18_2C_80_33_01_HFX_28May21_Wally_WBEH-20-08-04
soilwarming_2_heated_0-10_052018_S21	50964_Brodie_pool_18_2H_10_34_44_HFX_27May21_Wally_WBEH-20-08-04
soilwarming_2_heated_10-30_052018_S22	50964_Brodie_pool_18_2H_30_35_30_HFX_25May21_Wally_WBEH-20-08-04
soilwarming_2_heated_30-45_052018_S23	50964_Brodie_pool_18_2H_45_36_02_HFX_28May21_Wally_WBEH-20-08-04
soilwarming_2_control_45-60_052018_S9	50964_Brodie_pool_18_2C_60_32_45_HFX_26May21_Wally_WBEH-20-08-04
soilwarming_2_heated_60-80_052018_S25	50964_Brodie_pool_18_2H_80_38_23_HFX_28May21_Wally_WBEH-20-08-04
soilwarming_3_control_0-10_052018_S11	50964_Brodie_pool_18_3C_10_39_12_HFX_26May21_Wally_WBEH-20-08-04
soilwarming_3_control_10-30_052018_S12	50964_Brodie_pool_18_3C_30_40_46_HFX_27May21_Wally_WBEH-20-08-04
soilwarming_3_control_30-45_052018_S13	50964_Brodie_pool_18_3C_45_41_20_HFX_28May21_Wally_WBEH-20-08-04
soilwarming_3_heated_45-60_052018_S29	50964_Brodie_pool_18_3H_60_47_48_HFX_25May21_Wally_WBEH-20-08-04
soilwarming_3_control_60-80_052018_S15	50964_Brodie_pool_18_3C_80_43_39_HFX_28May21_Wally_WBEH-20-08-04
soilwarming_3_heated_0-10_052018_S26	50964_Brodie_pool_18_3H_10_44_18_HFX_26May21_Wally_WBEH-20-08-04
soilwarming_3_heated_10-30_052018_S27	50964_Brodie_pool_18_3H_30_45_41_HFX_27May21_Wally_WBEH-20-08-04
soilwarming_3_heated_30-45_052018_S28	50964_Brodie_pool_18_3H_45_46_10_HFX_28May21_Wally_WBEH-20-08-04
soilwarming_3_control_45-60_052018_S14	50964_Brodie_pool_18_3C_60_42_28_HFX_25May21_Wally_WBEH-20-08-04
soilwarming_3_heated_60-80_052018_S30	50964_Brodie_pool_18_3H_80_48_32_HFX_28May21_Wally_WBEH-20-08-04

## Sheet: SuppTable4
Supplementary Table 4. Metagenome assembly and coassembly statistics.
assembly/coassembly id	coassembly	coassembly-samples	QC_and_Genome_Assembly.Platform (for JGI sequenced)	scaffolds > 1K	percent_mapped	bp > 1K	assembly_scaf_N50	assembly_scaf_max	number of scaffolds > 50 KB
soilwarming_1_control_10-20_062014	no		Illumina NovaSeq S4 Regular (DNA) 270 bp fragment	266839	52.7	533595969	461092	251859	88
soilwarming_1_control_10-20_062014	no		Illumina NovaSeq S4 Low Input (DNA) 400 bp fragment	31379	24.5	55794415	104750	65378	6
soilwarming_1_heated_10-20_062014	no		Illumina NovaSeq S4 Regular (DNA) 270 bp fragment	246188	43.3	446400770	568296	79732	7
soilwarming_1_heated_10-20_062014	no		Illumina NovaSeq S4 Low Input (DNA) 400 bp fragment	55002	23.6	86486718	233768	59395	1
soilwarming_2_control_10-20_062014	no		Illumina NovaSeq S4 Regular (DNA) 270 bp fragment	229559	44.2	408846432	612640	339941	55
soilwarming_2_control_10-20_062014	no		Illumina NovaSeq S4 Low Input (DNA) 400 bp fragment	41749	24.4	66118656	165826	4158	0
soilwarming_2_control_80-90_062014	no		Illumina NovaSeq S4 Low Input (DNA) 400 bp fragment	203061	54.4	385033852	508863	137688	27
soilwarming_2_heated_10-20_062014	no		Illumina NovaSeq S4 Regular (DNA) 270 bp fragment	111205	33.5	186628682	398667	35992	0
soilwarming_2_heated_10-20_062014	no		Illumina NovaSeq S4 Low Input (DNA) 400 bp fragment	44593	20.5	71117915	187866	61313	1
soilwarming_2_heated_80-90_062014	no		Illumina NovaSeq S4 Low Input (DNA) 400 bp fragment	448037	68.3	903342099	609143	281853	89
soilwarming_3_control_10-20_062014	no		Illumina NovaSeq S4 Regular (DNA) 270 bp fragment	297737	59.8	623338347	483506	1016000	70
soilwarming_3_control_80-90_062014	no		Illumina NovaSeq S4 Low Input (DNA) 400 bp fragment	400539	60.6	795125063	789659	352714	85
soilwarming_3_heated_10-20_062014	no		Illumina NovaSeq S4 Regular (DNA) 270 bp fragment	175688	42.5	304036014	499752	55239	1
soilwarming_3_heated_10-20_062014	no		Illumina NovaSeq S4 Low Input (DNA) 400 bp fragment	39060	24	59769793	174245	31349	0
soilwarming_3_heated_80-90_062014	no		Illumina NovaSeq S4 Low Input (DNA) 400 bp fragment	1389820	81.7	2767295186	2869291	291089	153
soilwarming_1_control_10-20_122014	no		Illumina NovaSeq S4 Low Input (DNA) 400 bp fragment	415530	56.9	747788759	1081746	235353	63
soilwarming_2_heated_50-60_122014	no		Illumina NovaSeq S4 Low Input (DNA) 400 bp fragment	27677	30.1	47543644	76852	37839	0
soilwarming_2_control_10-20_122014	no		Illumina NovaSeq S4 Low Input (DNA) 400 bp fragment	22726	17.8	35595486	101734	18102	0
soilwarming_2_heated_10-20_122014	no		Illumina NovaSeq S4 Low Input (DNA) 400 bp fragment	3656	9.1	5102533	53568	13188	0
soilwarming_1_control_10-20_062015	no		Illumina NovaSeq S4 Low Input (DNA) 400 bp fragment	1494	10.8	1998930	34878	12641	0
soilwarming_1_heated_50-60_062015	no		Illumina NovaSeq S4 Low Input (DNA) 400 bp fragment	67195	33.9	134594889	89279	50829	1
soilwarming_2_control_10-20_062015	no		Illumina NovaSeq S4 Low Input (DNA) 400 bp fragment	37147	23.9	73953758	113537	156779	34
soilwarming_2_heated_10-20_062015	no		Illumina NovaSeq S4 Low Input (DNA) 400 bp fragment	29537	19.5	49374564	118500	89249	1
soilwarming_3_heated_10-20_062015	no		Illumina NovaSeq S4 Low Input (DNA) 400 bp fragment	33146	20.9	49278407	136670	17133	0
soilwarming_1_control_00-10_052021	no		Illumina NovaSeq S4 Regular (DNA) None bp fragment	819617	61.4	1659849504	1232503	311254	180
soilwarming_1_control_10-30_052021	no		Illumina NovaSeq S4 Regular (DNA) None bp fragment	642307	58.8	1114435170	1812933	125603	23
soilwarming_1_control_30-50_052021	no		Illumina NovaSeq S4 Regular (DNA) None bp fragment	741686	67.9	1521022920	1087278	549733	134
soilwarming_1_control_50-70_052021	no		Illumina NovaSeq S4 Regular (DNA) None bp fragment	909065	71.1	1917005752	1080097	212471	116
soilwarming_1_heated_00-10_052021	no		Illumina NovaSeq S4 Regular (DNA) None bp fragment	571485	47.1	1126592199	1039546	1132000	255
soilwarming_1_heated_10-30_052021	no		Illumina NovaSeq S4 Regular (DNA) None bp fragment	468817	58.7	901923654	1020384	1491000	46
soilwarming_1_heated_30-50_052021	no		Illumina NovaSeq S4 Regular (DNA) None bp fragment	666452	67.1	1422540666	753890	240455	215
soilwarming_1_heated_70-90_052021	no		Illumina NovaSeq S4 Regular (DNA) None bp fragment	978488	75.8	2119202952	1102141	302166	294
soilwarming_2_control_00-10_052021	no		Illumina NovaSeq S4 Regular (DNA) None bp fragment	370299	49.1	740185949	704514	819571	107
soilwarming_2_control_10-30_052021	no		Illumina NovaSeq S4 Regular (DNA) None bp fragment	480007	52.9	956171779	784789	555969	97
soilwarming_2_control_30-50_052021	no		Illumina NovaSeq S4 Regular (DNA) None bp fragment	503292	66	970555064	1014284	888147	115
soilwarming_2_control_50-70_052021	no		Illumina NovaSeq S4 Regular (DNA) None bp fragment	596275	65.1	1245835559	724494	993949	87
soilwarming_2_control_70-90_052021	no		Illumina NovaSeq S4 Regular (DNA) None bp fragment	713048	71.4	1540602517	816529	522907	260
soilwarming_2_heated_10-30_052021	no		Illumina NovaSeq S4 Regular (DNA) None bp fragment	402663	51.9	654962010	1626443	54936	2
soilwarming_2_heated_30-50_052021	no		Illumina NovaSeq S4 Regular (DNA) None bp fragment	376318	55	653521923	1155672	85386	12
soilwarming_2_heated_70-80_052021	no		Illumina NovaSeq S4 Regular (DNA) None bp fragment	1313457	80.1	2861327233	1612039	26474	295
soilwarming_3_control_00-10_052021	no		Illumina NovaSeq S4 Regular (DNA) None bp fragment	761635	55.6	1625693240	1259742	3313000	444
soilwarming_3_control_10-30_052021	no		Illumina NovaSeq S4 Regular (DNA) None bp fragment	962689	62.2	2141156714	1122732	253000	493
soilwarming_3_control_30-50_052021	no		Illumina NovaSeq S4 Regular (DNA) None bp fragment	978366	70.4	2007465478	1321651	255812	137
soilwarming_3_control_50-70_052021	no		Illumina NovaSeq S4 Regular (DNA) None bp fragment	375088	59	670300376	905822	235189	60
soilwarming_3_heated_00-10_052021	no		Illumina NovaSeq S4 Regular (DNA) None bp fragment	698049	52.4	1291757275	1367860	495597	44
soilwarming_3_heated_10-30_052021	no		Illumina NovaSeq S4 Regular (DNA) None bp fragment	491717	50.6	952024052	861539	377309	56
soilwarming_3_heated_30-50_052021	no		Illumina NovaSeq S4 Regular (DNA) None bp fragment	733241	64	1415569176	1242608	230507	41
soilwarming_3_heated_50-70_052021	no		Illumina NovaSeq S4 Regular (DNA) None bp fragment	677795	66.3	1370258042	927090	235131	57
soilwarming_3_heated_70-90_052021	no		Illumina NovaSeq S4 Low Input (DNA) 400 bp fragment	243980	57.7	436587160	592840	94107	10
soilwarming_3_heated_70-90_052021	no		Illumina NovaSeq S4 Low Input (DNA) 400 bp fragment	1135247	79.2	2232764793	2411659	110046	106
soilwarming_1_heated_50-70_052021	no		Illumina NovaSeq S4 Regular (DNA) None bp fragment	855485	68.3	1841859397	901846	300575	145
soilwarming_2_heated_00-10_052021	no		Illumina NovaSeq S4 Regular (DNA) None bp fragment	594031	49.9	1114814920	1188779	518973	78
soilwarming_1_control_70-90_052021	no		Illumina NovaSeq S4 Regular (DNA) None bp fragment	1582306	83.2	3367029250	2425302	607122	316
soilwarming_1_heated_80-90_052016_S42	no			1287	7.619	1683457	69911	12663	0
soilwarming_1_unheated_80-90_052016_S33	no			15525	25.996	24994224	149948	13320	0
soilwarming_2_heated_50-60_052016_S44	no			48781	41.166	90351824	177689	34659	0
soilwarming_2_unheated_10-20_052016_S34	no			6984	14.876	11117323	144618	40284	0
soilwarming_2_unheated_50-60_052016_S35	no			41516	37.853	77380375	155099	53856	2
soilwarming_1_unheated_10-20_052016_S31	no			6355	9.382	11323425	43969	56258	1
soilwarming_2_heated_10-20_052016_S43	no			31457	25.996	56142943	198647	57739	1
soilwarming_3_heated_10-20_052016_S46	no			19902	19.746	38913937	122298	57740	1
soilwarming_2_heated_80-90_052016_S45	no			10353	21.122	14543456	189088	58514	1
soilwarming_3_heated_80-90_052016_S48	no			23493	26.874	44794903	162060	61841	2
soilwarming_2_unheated_80-90_052016_S36	no			28186	32.771	51941306	138696	95585	11
soilwarming_1_heated_50-60_052016_S41	no			39965	34.536	84352612	162973	98957	16
soilwarming_3_unheated_50-60_052016_S38	no			60877	44.837	118103680	144154	107941	16
soilwarming_1_unheated_50-60_052016_S32	no			59266	37.94	102790628	225115	339245	36
soilwarming_3_unheated_80-90_052016_S39	no			10796	16.483	37371957	63150	370154	68
soilwarming_3_unheated_10-20_052016_S37	no			24362	21.781	66716091	105459	420727	95
soilwarming_1_heated_10-20_052016_S40	no			24859	20.735	44782070	123624	450211	31
soilwarming_3_heated_50-60_052016_S47	no			14347	29.807	26964136	279622	521942	31
soilwarming_3_heated_10-30_052018_S27	no			3582	12.736	4816377	93742	4343	0
soilwarming_1_unheated_0-10_052018_S1	no			1292	10.138	1637262	140404	5125	0
soilwarming_1_heated_0-10_052018_S16	no			12480	12.877	21854539	73796	12017	0
soilwarming_1_heated_30-45_052018_S18	no			10349	22.32	16057547	148836	16371	0
soilwarming_1_heated_45-60_052018_S19	no			7934	14.618	14926509	110184	18664	0
soilwarming_2_unheated_30-45_052018_S8	no			47740	37.432	75520690	340859	20044	0
soilwarming_3_heated_0-10_052018_S26	no			6233	9.052	13064422	69589	22543	0
soilwarming_2_heated_45-60_052018_S24	no			21344	31.62	36017715	172707	23942	0
soilwarming_2_heated_30-45_052018_S23	no			4804	18.704	6466166	159910	30032	0
soilwarming_3_heated_30-45_052018_S28	no			27884	33.832	43432487	263816	36313	0
soilwarming_3_unheated_45-60_052018_S14	no			24301	29.723	43307156	203660	41057	0
soilwarming_1_unheated_45-60_052018_S4	no			47351	41.65	82717717	264939	45809	0
soilwarming_1_heated_60-80_052018_S20	no			28961	31.992	50579039	117874	46413	0
soilwarming_1_heated_10-30_052018_S17	no			14373	21.883	25379860	151345	50071	1
soilwarming_1_unheated_10-30_052018_S2	no			33101	31.51	61655796	207202	63767	4
soilwarming_3_heated_45-60_052018_S29	no			46685	37.818	74959867	333088	93097	3
soilwarming_2_unheated_45-60_052018_S9	no			107535	49.641	229153774	230206	96884	17
soilwarming_3_unheated_30-45_052018_S13	no			64951	44.974	113618267	298499	104815	7
soilwarming_2_unheated_60-80_052018_S10	no			34851	34.606	67992887	123031	105848	15
soilwarming_3_unheated_10-30_052018_S12	no			44737	37.893	98199182	131266	111933	36
soilwarming_1_unheated_60-80_052018_S5	no			72333	48.127	159074438	133814	134272	20
soilwarming_2_heated_0-10_052018_S21	no			10819	11.563	24212271	65920	202184	39
soilwarming_3_unheated_60-80_052018_S15	no			32647	30.106	65670460	110838	224238	28
soilwarming_2_heated_60-80_052018_S25	no			60826	51.979	132208046	114415	252128	44
soilwarming_3_heated_60-80_052018_S30	no			105120	46.492	212534966	429305	765997	43
soilwarming_3_unheated_0-10_052018_S11	no			8992	18.88	29186964	125741	1163369	46
soilwarming_1_unheated_30-45_052018_S3	no			63833	45.599	127018331	268606	1288401	45
soilwarming_2_heated_10-30_052018_S22	no			1022	10.035	7280394	76744	1576809	18
soilwarming_2_unheated_0-10_052018_S6	no			10631	18.134	32961995	118015	1582032	34
soilwarming_2_unheated_10-30_052018_S7	no			22966	28.462	39492214	252140	2491695	8
soilwarming_unheated_10-20_052016_S31S34S37	yes	soilwarming_unheated_10-20_052016_S31,soilwarming_unheated_10-20_052016_S34,soilwarming_unheated_10-20_052016_S37		43181	20.684	98822451	271207	418225	97
soilwarming_unheated_50-60_052016_S32S35S38	yes	soilwarming_unheated_50-60_052016_S32,soilwarming_unheated_50-60_052016_S35,soilwarming_unheated_50-60_052016_S38		204618	52.653	394380331	489347	339245	50
soilwarming_unheated_80-90_052016_S33S36S39	yes	soilwarming_unheated_80-90_052016_S33,soilwarming_unheated_80-90_052016_S36,soilwarming_unheated_80-90_052016_S39		84119	32.296	170939318	317518	370154	78
soilwarming_heated_10-20_052016_S40S43S46	yes	soilwarming_heated_10-20_052016_S40,soilwarming_heated_10-20_052016_S43,soilwarming_heated_10-20_052016_S46		123836	35.782	233669294	494613	450211	46
soilwarming_heated_50-60_052016_S41S44S47	yes	soilwarming_heated_50-60_052016_S41,soilwarming_heated_50-60_052016_S44,soilwarming_heated_50-60_052016_S47		157687	47.911	296093592	563234	467131	43
soilwarming_heated_80-90_052016_S42S45S48	yes	soilwarming_heated_80-90_052016_S42,soilwarming_heated_80-90_052016_S45,soilwarming_heated_80-90_052016_S48		39116	24.863	67048361	498502	61841	3
soilwarming_unheated_0-10_052018_S1S6S11	yes	soilwarming_unheated_0-10_052018_S1,soilwarming_unheated_0-10_052018_S6,soilwarming_unheated_0-10_052018_S11		27432	22.26	74548223	441255	1475436	85
soilwarming_unheated_10-30_052018_S2S7S12	yes	soilwarming_unheated_10-30_052018_S2,soilwarming_unheated_10-30_052018_S7,soilwarming_unheated_10-30_052018_S12		121855	42.493	233405649	646554	2491635	24
soilwarming_unheated_30-45_052018_S3S8S13	yes	soilwarming_unheated_30-45_052018_S3,soilwarming_unheated_30-45_052018_S13,soilwarming_unheated_30-45_052018_S13		238443	52.824	462051355	657609	1170190	59
soilwarming_unheated_45-60_052018_S4S9S14	yes	soilwarming_unheated_45-60_052018_S4,soilwarming_unheated_45-60_052018_S9,soilwarming_unheated_45-60_052018_S14		242031	53.61	513263495	482022	121889	44
soilwarming_unheated_60-80_052018_S5S10S15	yes	soilwarming_unheated_60-80_052018_S5,soilwarming_unheated_60-80_052018_S10,soilwarming_unheated_60-80_052018_S15			49.745		352157	224238	41
soilwarming_heated_10-30_052018_S17S22S27	yes	soilwarming_heated_10-30_052018_S17,soilwarming_heated_10-30_052018_S22,soilwarming_heated_10-30_052018_S27		26669	23.68	48870362	390973	1403665	21
soilwarming_heated_30-45_052018_S18S23S28	yes	soilwarming_heated_30-45_052018_S18,soilwarming_heated_30-45_052018_S23,soilwarming_heated_30-45_052018_S28		80868	40.989	130268865	629426	36313	0
soilwarming_heated_45-60_052018_S19S24S29	yes	soilwarming_heated_45-60_052018_S19,soilwarming_heated_45-60_052018_S24,soilwarming_heated_45-60_052018_S29		113242	43.124	187183822	679352	93097	3

## Sheet: SuppTable5
Supplementary Table 5. rpsC sequences and cluster information.
rpsC-cluster-id	rpsC-cluster-size	rpsC-gene-id	rpsC-scaffold-length	rpsC-gene-id_centroid	rpsC-sequence	marker-scaffold-length
rpsC_lf.cluster0	1	Ga0577627_0104777_1504_2799	Ga0577627_0104777	1	MGQKVHPESLRVGYIHDWKSNWFNERNFADYLDEDIRIRKHINDKLAHAGLSSITIRKDSNEVEVNIHTARPGIVIGKSGSEVDALRRDLHRMTGKAIKVNILEIKRPELDAALVAQSIGEQLQNRVAFRRAMKRALTSAMRSGAKGVRVQVSGRLGGAEMARTEGYSDGRVPLHTLRADIDYGFYEARTTFGRIGVKCWINKGEIMPEGYSGTDLTDVNAPRPGEDRGGRDGGGRGGRGGRGGDRGGRGGGPGGFGGGPRGGGGRGGSGGRGGGPGGGGGRGGGPGGGGGRGGGPGGGGGRGGGPGGGSGGGGGRGGGPGGGSGGGGGRGGGPGGGSGGGGGRGAGPGGGSGGGGRGGGASGGGGRGGGPGGGGGASGGGGSGGDQGGGPQRPAESGS…	3356
rpsC_lf.cluster1	6	Ga0577635_0293836_38_1288	Ga0577635_0293836	1	MGQKIHPGGLRVGVIHDWKSNWYTGKKEFPAYILEDVRIREHIYKKLSHAGLSDILIRKDKQRITVDIYTARPGIVIGKSGVEVDALRRELHAITQKNVHININEIKRPELDAKLVAQSIAEQLSNRVAFRRAMKRALASAIRSGAAGVKIQCAGRLGGGEMSRSETYNEGRVPLHTIRADIDYGFVEARTSAGRIGVKVWINKGEIMPEGYEGVAQGDQRLGDQDTRRRRGGATEGLGASRESGRGRGPDREGLGPVKRRRGPGGGAGGGGGRGPGGAGGGGRGAGGGGRGPGGAGGGGGGGRPGGGGGRGPAAGSRPAGGRPAGGQGQGGQGQGGQGQGGQRPAGGAGGRQQRPPRPQENVEKPRTDDSGVSAEGREQPVIQPEPETTPKPVADAPD…	1439
rpsC_lf.cluster10	4	Ga0577626_0091765_705_1907	Ga0577626_0091765	1	MGQKIHPGGLRVGVIHPWKSNWYTGKKEFPQYLIEDIRIREHIYKKLAHAGLSDILIRKDKQRITVDIYTARPGIVIGKSGVEVDALRKELHGMTGKNVHININEIKRPELDAKLVAQSIAEQLQNRVSFRRAMKRALASAIRSGAAGVRIQCGGRLGGSEMSRSESYSEGRVPLHTIRADIDYGFVEAKTTYGRIGVKVWVNRGEIMPEGYEGVASGDGRADQDTARRRRGGASLEGLGASRESGRGRSGDREGLGPVRKRRPGGGGPGGAGGAGGAGGGRGRGGAGGGRGAGAPRSGGQRSGGGGAGGGGGAGGGGGGAGRARPQENVEKPRTDDTGTSAEGREQPVIEPQVETTPAPVADAPDTTTPKQQTEDPTKLDQSGDPSQEKPKRGGKGGDS	3786
rpsC_lf.cluster100	2	Ga0577643_00745531_201_1265	Ga0577643_00745531	1	MGQKVHPIGFRLGVYRNWDARWYADKDYTALLHEDIAIRRLIGGRLRNAGVARIETERRGNELTVTIQTAKPGIVIGKQGASVDSLRDELEKITAKKVRVTIHEIKTPELDAKLVAENVASQLEKRIAFRRALKQTLLRSMRAGAKGCKIQVSGRLGGAEMSRREWDRGGRVPLHTLRANIDYGQAEARTTFGRIGVQAWIYKGDFVTATGEPISGTAVRESDDGDATESLERPAAAGAEAAARARAALAADSARDAAAAVVVAVPEPETADTEAADTEASLADDEEVDADEAAVVAAVGVLPEDGKKVEKLASKRKAPAAAKKPATRTAAKPAARKAPAHKPSGSVNSAAEEE	1268
rpsC_lf.cluster1000	2	Ga0577631_0126522_67_915	Ga0577631_0126522	1	VGQKINPHGFRLGITTDWKSRWYADKQYADYVKEDVAIRRLLSTGLERAGIANVEIERTRDRVRVDIHTARPGIVIGRRGTEADRIRADLEKLTGKQVQLNILEVKNPESQAQLVAQGVAEQLSNRVAFRRAMRKAIQSAMRQPNVKGIRVQCSGRLGGAEMSRSEFYREGRVPLHTLRADIDYGLYEAKTTFGRIGVKVWIYKGDIVGGKRELAAAAPAGADRPRRERPSGARPRRSGASGTTATSTEAGRAAGAEESTVQPAAPPAADVAPALEPQSTES	1982
rpsC_lf.cluster1001	6	Ga0577623_0121541_504_1352	Ga0577623_0121541	1	VGQKINPHGFRLGITTDWKSRWYADKQYADYIKEDVAIRRLLATGLERAGIADVEIERTRDRVRVDIHTARPGIVIGRRGTEADRIRADLEKLTGKQVQLNILEVKNPESQAQLVAQGVAEQLSNRVAFRRAMRKAIQSAMRQPNVKGIRVQCSGRLGGAEMSRSEFYREGRVPLHTLRADIDYGLYEAKTTFGRIGVKVWIYKGDIVGGKRELTAAAPTGAERPRRERPSGTRPRRSGASGTTATGTDVSRAAEEAPAPEAPAAEPAPAEAPAAETESTES	2478
rpsC_lf.cluster1002	4	Ga0577642_0070369_1857_2705	Ga0577642_0070369	1	MGQKVHPEAMRVGYIHDWKSNWFNERSFAEYLAEDVQVRAHIEGKLAHAGLSDITIRKDANELEVNIHTARPGIVIGKSGTEVDALRRDLHRMTKKQIKVNILEIKRPELDARLVAQSIAEQLQNRVAFRRAMKRALTSAMRSGAKGVKVQVAGRLGGAEMARTESYSDGRVPLHTLRADIDYGFYEARTTFGRIGVKCWVNKGEIMPEGYTGADLTDMTAPAPQSSERDGRDGRDGPRGRRGANGRGGGPGGNGRGRGAGARGGAGRPGGGRGRPGAGGGG	3325
rpsC_lf.cluster1003	2	Ga0480460_000058_4490_5338	Ga0480460_000058	1	VGQKVNPHGFRLGITTDFKSRWIAEKPGQYKSYIVEDVAIRRMLQRGMERAGISKVEIERTLDRIRVDIHTARPGIVIGRRGAEADRIRSDLEKLTSKQVQLNILEVKNPEIDAQLVAQGVAEQLSSRVSFRRAMRKAMQTAMKSGAKGIRVQCSGRLGGAEMSRSEFYREGRVPLHTLRADIDYGFYEARTTFGRIGVKVWIYRGDAAATRAEREAAAAALRAGQRPGGGRDRERPQQRGQRRRPGSGEGGDRGDRGAPAAQAAAAPEAPAAAASTSGEEG	14694
rpsC_lf.cluster1004	1	Ga0577635_0075002_691_1539	Ga0577635_0075002	1	MGQKVHPEVLRVGYIHDWKSQWFNEREFSDYLLEDIHIRDHIEGKLSHAGLSSITIRKDKNEVEVNIHTARPGIVIGKSGTEVDALRRELHRMTKKSVRVNILEIKRPELDAKLVAQSIAEQLQNRVAFRRAMKRSLTSAIRSGAKGVKVQVSGRLGGAEMARTEGYSDGRVPLHTLRADIDYGFFEARTTFGRIGVKVWINKGEIMPSGFAQDLTQMEAPQQAAPGGGGGGDRDGRGGRGGRGRRGGRGGGPGGAGGGGGGGRGPGGPGQGGRGGGPRGGR	2727
rpsC_lf.cluster1005	2	Ga0577627_0401234_836_1681	Ga0577627_0401234	1	MGQKVNPVGFRLGIYRNWDARWYADKDYTKLLHEDLAMRRLITGRLRNAGLARIETERSANQLTIIIQTAKPGIVIGKQGASVDALRDELERISGKKVRVTIHEIKSPEVDAKLVAESVASQLEKRIAFRRAIKQSIMRTMRAGAKGVKIQVSGRLGGSEMSRREWDRDGRVPLHTLRANIDYGQAEARTTFGRIGVTVWIYKGDFVTATGEPILPGGDGRAREDGGEGERPRRTPAARPEPARAAAAPSVPAAEPVVAAAPAAVAAPVAPPRPAPVAEPEP	1682
rpsC_lf.cluster1006	5	Ga0577616_0317569_547_1395	Ga0577616_0317569	1	VILARLRNAGIAKIETERSSNAQLTVTIHTAKPGIVIGKGGASVDQLREDLEKRFGNRVRISIQEIKQPELDAQLVAENIASQIERRISYKRAMKQAILRTMRSGAKGVRIYCGGRLRGAEMARREWDREGRVPLHTLRANIDFGRATASTTFGAIGVKCWIYKDQVAPKKVAAAAETSVPLAEIIAPQPELLEVLAEPQAAVEVATPEPEVVTETPAPRRARATTTSTTTRTTTAKPAAKPKAAPKPKAEAKTETKAKAAPKAKAEAKAPAKKTSTKKAKS	1395
rpsC_lf.cluster1007	3	Ga0577616_0036036_2522_3367	Ga0577616_0036036	1	MGQKIHPIGFRLSVNKNWSSRWYANSKNFATMLNEDLKVRAYLKKRLSHASVGKVVIERPAKDARITIHSARPGVVIGKKGEDIEMLKADLRKLLGVQMVHVNIEEIRKPEVDAQLISDSIAQQLEKRIMFRRAMKRAMQNAMRLGAQGIKIMSAGRLNGIEIARTEWYREGRVPLHTLRADIDYGFSEAKTTYGVIGIKCWVYKGEVMAKGDQPVAPPAPTADEVLAAKKVKKVTPKPAPSALEDKPEPIAAAKTASDTGTSAAPQAKPRAARPHPVAVKK	3368
rpsC_lf.cluster1008	2	Ga0577638_0548418_1_846	Ga0577638_0548418	1	MGQKVNPIGFRVGVYRNWDARWYADKEYTKLLHEDIAMRKLITGRLRNAGLARIETERSANQLTIVIQTAKPGIVIGKQGASVDALRDELERISGKKVRVTIHEIKTPELDAKLVAENVASQLEKRIAFRRAVKQSVMRTMRAGAKGVKIQVSGRLGGAEMSRREWDRDGRVPLHTLRANIDYGQAEARTTFGRLGVTCWIYKGDFVTATGEPILPGGDGRPALDEEQAERVTRRVPARAAAAPTAEVVEAPVAAPVEATPAVADAVTPEVEADATIEVPDE	1711
rpsC_lf.cluster1009	3	Ga0480455_00181808_255_1103	Ga0480455_00181808	1	VGQKINPHGFRLGITTDWKSRWYADKQYADYIKEDVAIRRLLATGLERAGIADVEIERTRDRVRVDIHTARPGIVIGRRGTEADRIRADLEKLTGKQVQLNILEVKNPESQAQLVAQGVAEQLSNRVAFRRAMRKAIQSAMRQPNVKGIRVQCSGRLGGAEMSRSEFYREGRVPLHTLRADIDYGLYEAKTTFGRIGVKVWIYKGDIVGGKRELTAAAPAGGERPRRERPSGTRPRRSGASGTTATGTDVSRAAEEAPAAEAPAAEPAPAEAPAAETESTES	2897
rpsC_lf.cluster101	1	Ga0577624_0050829_717_1781	Ga0577624_0050829	1	MGQKVHPEAMRVGYIHDWKSNWFNERHFAEYLAEDVRVREHITRRLAHAGLSDITIRKDSGELQVNIHTARPGIVIGKSGTEVDALRRDLHRITQKQIKVNILEIKRPELDAKLVAQSIAEQLQNRVAFRRAMKRALTSAMRSGAKGVKVQVAGRLGGAEMARTESYSDGRVPLHTMRADIDYGFYEAATTFGRIGVKCWVNKGEIMPEGYTGADLTDMSAPAPPSSERDGRGGREGRDGRGRGRGGSGGPGGGRGRGPGGPGGGRGPGGPGGGRGPGGPGGGRGPGGPGGPGGGRGPGGPGGGRGRGPGGPGGGRGPGGPGGPGGGRGPGGPGGGRGPGGPGGGRGRSPEVTR	4240
rpsC_lf.cluster1010	1	Ga0577639_0548943_2_850	Ga0577639_0548943	1	MEDLELKASLGARLKSAGVSSIEVDRPGNKLRITIRTSRPGIVIGRKGAEIEKLKQDLAKKTKREVFIDIQEVHKPELDAQLVSESIALQLEKRVAFRRAMRKAVDSALRFGCKGIKVRVSGRLNGAEIARSEWYLQGQLPLHTLRADLDYGFSEAHTTYGIIGIKCWVYKGEILEAQGRSRSSLKNEGEPRRNAPRGGDRDRDRDRRDRDRRPVGQGPGTFSSPNPPPPAPVQAETGAVQSTPGELPQPAKSGAPIVPPLSAPQPAWKQELKSDSGDKGTE	1135
rpsC_lf.cluster1011	2	Ga0577625_0426983_246_1094	Ga0577625_0426983	1	VGQKVNPHGFRLGISTDHKSRWYADKLYKDYVGEDVKIRRLLSKGMERAGISRVEIERTRDRVRVDIHTARPGIVIGRRGAEADRIRGSLEELTGKQVQLNILEVKNAEVDAQLVAQGVAEQLSGRVAFRRAMRKAMQTTMRGGALGIRIQCSGRLGGAEMSRSEFYREGRVPLHTLRADIDYGFYEARTTFGRIGVKVWIYKGDLAGTRAEREAQAAARAATQQRGRPARRDGGGGDRGDRGGRGGDRGGRRDGGAPRNEAPKAEAAPAAEKPAETTGTES	1377
rpsC_lf.cluster1012	1	Ga0480588_0134828_725_1573	Ga0480588_0134828	1	NWASRWYANNRDFAGMLAEDIKVREYLKTKLKNAAVSRILIERPAKNARITIFSARPGVVIGKKGEDIEALKKELGKRLGVPVAVNIEEVRKPEIDAKLIADSITQQLEKRIMFRRAMKRAMQNAMRLGAQGIKIMSSGRLNGIEIARCEWYREGRVPLHTLKADIDYGFSEAKTTYGVIGVKCWVYRGDRLAAGEAPGVQAPAQEEERRPRRPARPGDRPGGDRRGPPPGRGDRAPRLAGAPVDGTDKPAEAGGAEAPKTPTVKRVRKAVPPAGTGGAKGE	1575
rpsC_lf.cluster1013	1	Ga0577620_0157514_2_847	Ga0577620_0157514	1	VGQKVNPHGFRLGITTDFKSRWYADKLYKDYVKEDVAIRRMLQRGMERAGISKVEIERTRDRVRVDIHTARPGIVIGRRGAEADRIRGDLEKLTGKQVQLNILEVKNPEIDAQLVAQGVAEQLSSRVAFRRAMRKAIQSAMKSGAKGIKVQCGGRLGGAEMSRSEFYREGQVPLHTLRADIDYGFYEARTTFGRIGVKVWIYKGEAPATRAEREAQAAAQRAAGAGAGAGGGGGRRGERSERGERRGGGRRGARGGGGERGGGGGGERRQPQPTDRQPQPTE	1576
rpsC_lf.cluster1014	1	Ga0577620_0359275_171_1016	Ga0577620_0359275	1	GVEVDALRRELHALTQKNVHININEIKRPELDAKLVAQSIAEQLSNRVAFRRAMKRALASAIRSGAAGVKIQCSGRLGGGEMSRRETYNEGRVPLHTIRADIDYGFVEARTSAGRIGVKVWINKGEIMPEGFESITGGEQRLGDQDARRRRGGATEGLGASRESGRGRTQDREGLGPVKRRRGPGGGAGGGAGGAGGRGGAGGRGPGGAGGRGPGGAGGRGPGGSGGPGGAGGAGGGRGRGPAQGSRPASSRPRPQDTPKPKTDDQPNADTPPKSDEGTDA	1016
rpsC_lf.cluster1015	4	Ga0577627_0244986_271_1116	Ga0577627_0244986	1	VGQKVNPHGFRLGITTDFKSRWYADKLYKDYVAEDVAIRRMLQRGMERAGISKVEIERTRDRVRVDIHTARPGIVIGRRGAEADRIRGDLEKLTSKQIQLNILEVKNPETDAQLVAQGVAEQLSSRVSFRRAMRKAMQTSMKGGAKGIRVQCSGRLGGAEMSRSEFYREGRVPLHTLRADIDYGFYEARTTFGRIGVKVWIYRGEAPQTRAEREAAAAALRAGGQRRDRPTGPQRRRRPGGPDGADRSPGDRSDDRAPAQASAAQPEPAAAATAPATGEEG	2195
rpsC_lf.cluster1016	1	Ga0577635_0074390_449_1294	Ga0577635_0074390	1	MGQKVHPHGFRLGISTDWKSRWYADKLYKDYIAEDVKIRKMMSKGLERAGISKVDIERTRDRVRIDIHTARPGIVIGRKGAEADRIRGELEKLTGKQVQLNILEVKSPESDAQLVAQAIAEQLSSRVSFRRAMRKSMQSAMKNPLVKGIRVQCSGRLGGAEMSRSEFYREGRVPLHTLRANIEYGFFEARTTFGRIGVKTWIYKGDAVPGREAPTESGPPRPRRDRAERPDRPRRLRSGSSGTTAGGTEAGRAVSAEPVAAASTTAEAGTAAAAPVEQQEG	2737
rpsC_lf.cluster1017	2	soilwarming_1_unheated_30-45_052018_S3_3411_5	soilwarming_1_unheated_30-45_052018_S3_3411	1	MGQKIHPTGFRLAVTRNWGSRWYAGNSNFAQMLNEDLKVRAFLKKKLKSASVGRVVIERPAKNARITIYSSRPGVVIGKKGEDIEVLKSSLTKLMGVPVHVNIEEIRKPEIDAQLIADSIAQQLEKRIMFRRAMKRAMQNAMRLGAQGIKIMSSGRLNGIEIARTEWYREGRVPLHTLRADIDYGFGEAETTYGIIGIKVWVYKGDRLANGEAPVIDVPNDDDKKRRGPRRDDGKPAGRPRAKTTTAGPGAPGARPARAKKPDGAAEGVAAVAAPAEKAGE	3881
rpsC_lf.cluster1018	4	Ga0577616_0149639_421_1266	Ga0577616_0149639	1	MGQKVHPEVLRVGYIHDWKSQWFNEREFSDYLLEDIHIRDHIEGKLSHAGLSSITIRKDKNEVEVNIHTARPGIVIGKSGTEVDALRRELHRMTKKSVRVNILEIKRPELDAKLVAQSIAEQLQNRVAFRRAMKRSLTSAIRSGAKGVKVQVSGRLGGAEMARTEGYSDGRVPLHTLRADIDYGFYEARTTFGRIGVKVWINKGEIMPSGFAQDLTQMEAPQQAAPGGGGGGDRDGRGGRGGRGRRGGRGGGPGGPGGPGQGGRGGGPGQGGRGGGPRGGR	1935
rpsC_lf.cluster1019	1	Ga0480586_0121499_2_844	Ga0480586_0121499	1	MGQKINPYGFRLGITTDWKSRWFSERDYKEYLTEDWKIRKALMTKLESAAVSRIEIERTRDKVRVDIHTARPGIVIGRRGAQADELRALLTEITGNPKVQLNIVEIKSPELDAALIAQGVADQLVNRIAFRRAMKRAVQNAQKAGALGIRVQCSGRLGGAEMSRTEWYREGRVPLHTLRADIDFGVREARTSSGRVGVKVWIYKGDIVPYKSINEDKITREAAMAVGDPSGAGAPRRVVSSAGRRPADGDVEATPLIKEADPELEKLLDEEEEIARRTHGG	1354
rpsC_lf.cluster102	2	Ga0577625_0000002_2434452_2435516	Ga0577625_0000002	1	MGQKVHPYGFRLGIHTDWKSRWFSEKQYRDYLEADLRIREYLLGQLPHAGISRIDIERTRERVRIDAHTARPGIVIGRRGAEAERLRSKLEEMESKMYGKPTDVRLNIIEVKQPELDAQLIAQGVAEQLASRVSFRRAMKKAVGTAMRHGAKGIRVQCAGRLGGAEMSRTEWYIEGQMPLHTLRADIDYGFSEAKTTFGRIGVKVWIYRGPFQDMYATARDAARLRREAALAAGETVGRGAEEREARKAKSSAKPKTEATPKAEAKPKAEAKPKAEAKPKAKPKAEATPKAEATPKAEATPKAEATPEAPDASETTPEVPEVAAAPEAAVVEETPEVVEAPEASAPTDEEGGAS	3029220
rpsC_lf.cluster1020	4	Ga0480455_00082552_1_843	Ga0480455_00082552	1	LGHKVHPNAFRLGVYRTWEANWFASNKDYTRLLHEDLAMRSLILGRLRNAGIARIETERSSNAMTVTIHTAKPGIVIGKGGASVDLLREDLEKKFGNRVRISIQEIKQPELDAQLVAENIASQIERRISHRRAMKQSILRTMRAGAKGVRIALGGRLRGAEMARRESDREGRVPLHTLRADIQFGRATAKTTFGMIGVKVWINRDLIKVRPRGGETQEPIAPQPTEAAAQAAAAQAAAQAAQGGGQRSQGQGGGQRGPRRRGGRRSGGGGGGGQGGQGGQG	4179
rpsC_lf.cluster1021	7	Ga0480449_0077390_759_1604	Ga0480449_0077390	1	MGQKVHPEAMRVGYIHDWKSNWFSDRNFAEYLREDVRIREHIVRKLAHAGLSDITIRKDSGELEINIHTARPGIVIGKSGSEVDALRRELHRMTNKQIKVNILEIKRPELNASLVAQSIAEQLQNRVAFRRAMKRALTSAMRSGAKGVKVQVAGRLGGAEMARTESYSDGRVPLHTMRADIDYGFYEARTTFGRIGVKCWVNKGEIMPEGYTGSDLTDLSAPPPPQSERGGRGGRDGGEGRSRRGGGGRERGGARGDQAGAGSTRAVVDPVDGSGAAGGER	2577
rpsC_lf.cluster1022	2	Ga0577627_0099809_1916_2761	Ga0577627_0099809	1	MGQKVHPEVLRVGYIHDWKSQWFNEREFSDYLLEDIHIREHIEGKLAHAGLSSITIRKDKNEVEVNIHTARPGIVIGKSGTEVDALRRELHRMTQKSVRVNILEIKRPELDAKLVAQSIAEQLQNRVAFRRAMKRSLTSAIRSGAKGVKVQVSGRLGGAEMARTEGYSDGRVPLHTLRADIDYGFFEARTTFGRIGVKVWINKGEIMPSGFAQDLTQMEAPQQAAPGGGGGGDRDGRGGRGGRGRRGGRGGGPGGPGGPGQGGRGGGPGQGGRGGGPRGGR	3433
rpsC_lf.cluster1023	1	Ga0480446_0075522_3_845	Ga0480446_0075522	1	MGQKVHPEAMRVGYIHDWKSNWFNERSFSEYLAEDIRVREHIIGKLAHAGLSDITIRKDANELEVNIHTARPGIVIGKSGTEVDALRRDLHRLTSKQIKVNILEIKRPELDAKLVAQSIAEQLQNRVAFRRAMKRALTSAMRSGAKGVKVQVAGRLGGAEMARTESYSDGRVPLHTMRADIDYGFYEARTTFGRIGVKCWMNKGEIMPEGYTGADLTDMTAPAAPSSDRDGRSGGDGRGRRRDGGGPGGGRGSGGPSGGRGFGGAGGGRGPGGRGGRGGGG	1655
rpsC_lf.cluster1024	1	Ga0506675_0000085_36669_37514	Ga0506675_0000085	1	MGQKVHPEVLRVGYIHDWKSQWFNEKEFSDYLLEDIHIRDHIEGKLAHAGLSSITIRKDKNEVEVNIHTARPGIVIGKSGTEVDALRRELHRMTKKSVRVNILEIKRPELDAKLVAQSIAEQLQNRVAFRRAMKRSLTSAIRSGAKGVKVQVSGRLGGAEMARTEGYSDGRVPLHTLRADIDYGFFEARTTFGRIGVKVWINKGEIMPSGFAQDLTQMEAPQQAAPGGGGGGDRDGRGGRGGRGRRGGRGSGSGGPGGPGQGGRGGGPGQGGRGGGPRGGR	37894
rpsC_lf.cluster1025	1	Ga0577635_0300466_579_1421	Ga0577635_0300466	1	LGHKVHPNGFRLGVYRPWEANWFAEDKDYTKLLHEDLEMRRVILKRLHNAGIAKIETERSSNAQMTVTIHTAKPGIVIGKGGASVDQLREDLEKRFGNRVRISIQEIKQPELDAQLVAENIASQIERRISYRRAMKQSILRTMRSGAQGIRVALGGRLRGSEMARREWDREGRVPLHTLRANIEFGRATAKTTFGMIGVKVWIYKGLVKIAPRGGEATAAEIAPQPDGPELQPQAAEAAPVVAQPVAVEAAPAVEAPVAPTPVAPTPAAAAAPPATAAAEA	1423
rpsC_lf.cluster1026	3	Ga0577639_0022026_1507_2352	Ga0577639_0022026	1	MGQKVHPEVLRVGYIHDWKSQWFNEREFSDYLLEDIHIREHIEGKLSHAGLSSITIRKDKNEVEVNIHTARPGIVIGKSGTEVDALRRELHRMTKKSVRVNILEIKRPELDAKLVAQSIAEQLQNRVAFRRAMKRSLTSAIRSGAKGVKVQVSGRLGGAEMARTEGYSDGRVPLHTLRADIDYGFFEARTTFGRIGVKVWINKGEIMPSGFAQDLTQMEAPQQAAPGGGGGGDRDGRGGRGGRGRRGGRGGGPGGAGGGGGGRGPGGPGQGGRGGGPRGGR	4777
rpsC_lf.cluster1027	1	Ga0577615_0158230_8_853	Ga0577615_0158230	1	MRELPHALISRVEVERTLDRLKVDVHTARPGIVIGRRGSEADRLRHNLEVMTSRHVQLNILEVKTPELEARLIAQNVADQLAGRVSFRRAMKRAVQNSMKAGAEGIRIQSSGRLGGAEMARREWYLEGRVPLHTLRADIDFGIAEARTTFGRIGVKVWVYKGEVLTSRAGQEADKIHAEAAMAVGESAQHRLTPKIRAEQAAGGRRPSVLGGDLPEQTQEGGKRLIEASSRDMSAVRRLGEDDTPGARVAEAMEGDPNLTSSGDGADTGQDTTDRPEGGDR	2465
rpsC_lf.cluster1028	2	Ga0577625_0004693_4991_5833	Ga0577625_0004693	1	MGQKVHPTGFRLGISTDWKSRWFADKLYKDYIGEDVKIRRMMSKGLERAGISKVDIERTRDRVRVDIHTARPGIVIGRKGAEADRIRGELEKLTGKQVQLNILEVKSPESDAQLVAQGVAEQLSSRVSFRRAMRKAMQSAMKNPICKGIRVQVSGRLGGAEMSRTEFYREGRVPLHTLRANIEYGFFEARTTFGRIGVKVWIYKGDAVPGREAAPEAPARPRRDRADRPERPRRGRSGSSGTTAGGTEAGRAAQAAQASTGDTNDHAATPAPAEAPQQEG	14540
rpsC_lf.cluster1029	2	Ga0480586_0057220_816_1658	Ga0480586_0057220	1	MGQKVHPESLRVGYIHDWKSNWFSEKNFSDYLDEDVRIRDHITGKLAHAGLSDITIRKDANEVEVNIHTARPGIVIGKSGSEVDALRKDLHRMTRKQIKVNILEIKRPELDAKLVAQSIAEQLQNRVAFRRAMKRALTSAMRSGAKGVKVQVSGRLGGAEMARTEGYSDGRVPLHTLRADIDYGFYEARTTFGRIGVKCWINKGEIMPEGYSGQDLTELEAPSPSSAAGGGRGGGPGGRGGGPGGRGGGPGGRGGGPGGRGGGRGGGRGGRGGGSPEVTR	1892
rpsC_lf.cluster103	3	Ga0577632_0007998_5602_6666	Ga0577632_0007998	1	VGRKVHPNGFRLGVYRGWEANWFATDKDYLKLLHEDMDMRRLILKRLRNAGIARIETERSSNAQLTVTIHTAKPGIVIGKGGASVDQLREDLEKRFGNRVRISINEIKQPEMNAQLVAENIASQIERRISYRRAMKQSILRTMRAGAKGVRIAAGGRLRGSEMARREWDREGRVPLHTLRADIDFGRATARTTFGMIGVKCWIYKGLVPGRKRGGDLDSDVFPQPVDGATPAPAAAAPPAAAPVAPAPAPVEPAAVVAQAPAEAAAPEAPPVAAEAAASVEAPPVAAEAAAPVEAPPVAAEAAAPVEAPPVAAEAAAPETSAVPAAEEAPKAPRKRTTKPKAEPAAKEDTDAPA	9580
rpsC_lf.cluster1030	2	Ga0577630_0010407_1189_2031	Ga0577630_0010407	1	VGQKINPHGFRLGITTEWKSRWYADKQYADYIKEDVAIRKLLATGLERAGIADVEIERTRDRVRVDIHTARPGIVIGRRGTEADRIRADLEKLTGKQVQLNILEVKNPESTAQLVAQGVAEQLSNRVAFRRAMRKAIQSAMRQPNVKGIRVQCSGRLGGAEMSRSEFYREGRVPLHTLRADIDYGLYEAKTTFGRIGVKVWIYKGDIVGGKRELVAPSAGAERPRRERPSGTRPRRSGSAGTTATSTEAGRAASSAEETSGLPAAAPVEAPAVEAQSTES	6829
rpsC_lf.cluster1031	1	soilwarming_heated_10-20_052016_S40S43S46_115286_2	soilwarming_heated_10-20_052016_S40S43S46_115286	1	MGQKINPHGFRLGITTDWKSRWYADKQYAEYVGEDVKIRKLLSTGMERAGISKVEIERTRDRVRVDIHTARPGIVIGRRGAEADRIRGALEKLTKKQVQLNILEVKNPEADAQLVAQGVAEQLSNRVAFRRAMRKALQTSMRSPQVKGIRVQCGGRLGGAEMSRSEHYHDGRVPLHTLRADIDYGFFEAKTTFGRIGVKVWIYKGEIVGGLKAKEARDAAAAAERAPRRDRGDRPARPRRSGASGTTATSTEAGRAAAAAKSEDVATEAAPAETAEKTEG	1034
rpsC_lf.cluster1032	1	Ga0577635_0002527_4490_5332	Ga0577635_0002527	1	VIYGSKDQSNRIARKLGEDLRVREFLRKKLRNASVGRILIERPAKNARITIFSARPGVVIGKKGEDIETLKSELQKMMGVPVHVNIDEIRKPELDAQLISDSITQQLEKRIMFRRAMKRAMQNAMRLGAQGVKIMSAGRLNGIEIARTEWYREGRVPLHTLRAEIDYGFSEAKTTYGVIGVKVWVYKGDTLGRNEAPAATEAAPPVEREERRTPRRPDGKPPGRPPLKRPAKRTEAAKTETAAAPAPAPVEDAAAKPTVKRVRKAAAKTDGKTPGSNGGA	10242
rpsC_lf.cluster1033	2	Ga0577633_0004365_11165_12007	Ga0577633_0004365	1	VGQKINPHGFRLGITTDWKSRWYADKQYSEYVKEDVAIRRLLSTGLERAGIADVEIERTRDRVRVDIHTARPGIVIGRRGTEADRIRADLEKLTGKQVQLNILEVKNPESQAQLVAQGVAEQLSNRVAFRRAMRKAIQSAMRQPNVKGIRVQCSGRLGGAEMSRSEFYREGRVPLHTLRADIDYGLYEAKTTFGRIGVKVWIYKGDIVGGKRELAAAAPAGAERPRRERPSGTRPRRSGASGTTATSTEAGRAAGAEEQAAAPAADGGAAPAVETQSTES	13936
rpsC_lf.cluster1034	1	Ga0577633_0225630_205_1047	Ga0577633_0225630	1	VGQKINPHGFRLGITTEWKSRWYADKQYADYIKEDVAIRKLLSTGLERAGIADVEIERTRDRVRVDIHTARPGIVIGRRGTEADRIRADLEKLTGKQVQLNILEVKNPESVAQLVAQGVAEQLSNRVAFRRAMRKAIQSAMRQPNVKGIRVQCSGRLGGAEMSRSEFYREGRVPLHTLRADIDYGLYEAKTTFGRIGVKVWIYKGDIVGGKRELVAPSAGADRPRRERPSGTRPRRSGSAGTTATSTEAGRAASSAEETSTPPAAAPAEAPAVEAQSTES	2195
rpsC_lf.cluster1035	2	Ga0577625_0001877_11287_12129	Ga0577625_0001877	1	MGQKVHPHGFRLGISTDWKSRWYADKLYKDYIGEDVKIRKMMSKGLERAGISKVDIERTRDRVRIDIHTARPGIVIGRKGAEADRIRGNLEKLTGKQVQLNILEVKSPESDAQLVAQGVAEQLASRVSFRRAMRKAMQSAMKNTMVKGIRVQCSGRLGGAEMSRSEFYREGRVPLHTLRANIEYGFFEARTTFGRIGVKVWIYKGDAVPGRETPADTGPARPRRERSDRPERPRRLRSGSSGTTAGGTEAGRAVATEPAPASTEAGEAVAAAPAEQQQEG	23106
rpsC_lf.cluster1036	1	Ga0577626_0694908_5_847	Ga0577626_0694908	1	MRVGYIHDWKSNWFNERQFAAYLQEDMKVRDHIINKLAHAGLSDITIRKNANELEVNIMTARPGIVIGKSGSEVDALRKDLHRMTRKQIKVNILEIKRPELDAKLVAQSIAEQLQNRVAFRRAMKRALTSAMRSGAKGVKVQVSGRLGGAEMARTEMYSDGRVPLHTMRADIDYGFYEARTTFGRIGVKCWINKGEIMPEGYTGADLTDMNAAPPPGAERDGRDGRDGRDRGGRGRGRGGSGPGGPGGPGGRRGGGPGGGRGGQGGQGGRGGGPGRGGPR	1220
rpsC_lf.cluster1037	1	Ga0577616_0550778_239_1078	Ga0577616_0550778	1	LGHKVHPNGFRLGVYRPWEANWFAVDKDYTKLLHEDLEMRRLILRRLHNAGIAKIETERSSNAQMTVTIHTAKPGIVIGKGGASVDQLREDLEKRFGNRVRISIQEIKQPELDAQLVAENIASQIERRISYRRAMKQSILRTMRSGAQGIRIALGGRLRGSEMARREWDREGRVPLHTLRANIEFGRATAKTTFGMIGVKVWIYKGLVKIAPRGGEATAAEIAPQPDGPELQPQAAEAAPVVAQPVAVEAAPAVEAPAAPAPAAPAPAAPAPAATAAPAA	1078
rpsC_lf.cluster1038	1	Ga0577626_0001826_24531_25373	Ga0577626_0001826	1	MGQKVHPHGFRLGISTDWKSRWYADKLYKDYIAEDVKIRKMMSKGLERAGISKVDIERTRDRVRIDIHTARPGIVIGRKGAEADRIRGNLEKLTGKQVQLNILEVKSPESDAQLVAQGVAEQLASRVSFRRAMRKAMQSAMKNTMVKGIRVQCSGRLGGAEMSRSEFYREGRVPLHTLRANIEYGFFEARTTFGRIGVKVWIYKGDAVPGRETPADTGPARPRRERSDRPERPRRLRSGSSGTTAGGTEAGRAVATEPAPAGTDAGEAVAAAPAEQQQEG	25695
rpsC_lf.cluster1039	1	Ga0577639_0020590_2133_2975	Ga0577639_0020590	1	VGQKVNPHGFRLGITTDFKSRWYAGKLYKDYVAEDVAIRRMLQKGMERAGISKVEIERTRDRVRVDIHTARPGIVIGRRGAEADRIRGDLEKLTSKQIQLNILEVKNPEIDAQLVAQGVAEQLSSRVSFRRAMRKAMQSAMKGGAKGIRVQCSGRLGGAEMSRSEFYREGRVPLHTLRADIDYGFYEARTTFGRIGVKVWIYKGEAPATRAAREAAAAAARAGGPRRDRPGGPPPRRRPDRPDRRERGERPDRGAGGPAPAAPAAPAEAPAGSGPTGAEG	4907
rpsC_lf.cluster104	7	Ga0577617_0059122_2065_3129	Ga0577617_0059122	1	MGQKVNPYGFRLGVTTDWKSRWFSDREYTDYLIEDWHIRDYLMRQLERAAVSRVEVERTRDRLRIDVHTARPGIVIGRRGAEADRLRADLAKITNNVKVQLNIQEIKQPELDAALIAQAVCDQLTGRVSFRRAMKRAVQTAQKAGAQGIRVQCSGRLGGSEMARSEWYREGRVPLHTLRADIDYGFREARTTFGRIGVKVWIYKGDILPYKVSGDDKIAKEARMAVGETSGEARPRRVISAGGGRRKPEQGEPGVPGEPGAEPAAAVEGAEPSEGAELPEGVELPEGVELPEGVELPEGVELPEGAEPPEGEEAAAPLVKEADPELERLLAEEEEIERRTRQHHETPHFRSGDE	3790
rpsC_lf.cluster1040	2	Ga0577619_00054643_4149_4991	Ga0577619_00054643	1	MGQKVNPHGFRLGITTDFKSRWYADKLYKDYVKEDVAIRRMMTSGMERAGISKVEIERTRDRVRVDIHTARPGIVIGRRGAEADRIRGDLEKLTGKQVQLNILEVKNPEMDAQLVAQAVAEQLSSRVSFRRAMRKSMQGTMKAGAKGIKIQCGGRLGGAEMSRSEFYREGRVPLHTLRANIDYGFFEAKTTFGRIGVKVWIYKGDVKNIAEVRAENAAARAGNRPARGGASDRPAGGRGGRGGERGGRGRKPQQAAPAAEASKAEAPAAAAPAESTGTEA	5894
rpsC_lf.cluster1041	2	Ga0577634_0505868_475_1317	Ga0577634_0505868	1	MGQKTNPIGARLGIIRGWESNWYGSKKDYAFKLIEDNKIRTYLNARINKGGIAKIVIERTLNKLIVTIHTSKPGIIIGKGGGEVDRIKEELKKLTGKDDVQINILEIRRPELDANIVGDTIARQIENRINYKRAIKMAIASALRMGAEGIKIKVAGRLGGAEIARTEEIKQGRTPLHTLRMDIDYANVFALTVYGKIGIKVWICKGEVLAKRDLNPNFVGGKTDVSDRRERRDGDHDRGHGGHRDDRRGGGDRRGGGGGGDRRGGGGGGDRRGGGGGGRH	1504
rpsC_lf.cluster1042	3	Ga0577634_0093320_1992_2834	Ga0577634_0093320	1	MGQKVNPHGFRLGITTDFKSRWYADKLYKEYVAEDVAIRRLLQRGMERAGISKVEIERTRDRVRVDIHTARPGIVIGRRGAEADRIRGDLEKLTGKQIQLNILEVRNPEVDAQLVAQGVAEQLSSRVSFRRAMRKAMQSSMKGGAKGIRVQCSGRLGGAEMSRSEFYREGRVPLHTLRADIDYGFYEARTTFGRIGVKVWIYKGEAPTSRAGREAAAAQAALRAAGQRDRGPRGGGRDRGDRGDRGDRGDRSGGGERRGGRRPDGAAAPQAAVSAPEGGS	3754
rpsC_lf.cluster1043	1	Ga0577619_01190091_2_841	Ga0577619_01190091	1	MGQKVHPIGFRLGIKVGERSVKDWDGRWFATGKEFSDLLLEDVRVRGHIMTRMSDAGVAKVEIERSANMITVTIHAAKPGIVIGKSGVKVEELRRTLEAMTAKRIRVTIQEIRQPEINAMLVARSIADQLEKRVAFRRAMKQAVQRAQRFGAKGVRVQVSGRLGGSEMSRREWDRWGRVPLHTLRADIDYGQTEAHTTYGVIGVKVWVYRGDFTPDGRSPEEVAAEQRQPDRRGPRATVRAEVAPEAVAEAAPAVPAEVDYSRGGVFEPGEDSGELRPRG	1196
rpsC_lf.cluster1044	1	Ga0577625_0477134_328_1170	Ga0577625_0477134	1	MGQKVNPYGFRLGITTDFKSRWYADKLYKDYVKEDVAIRRMMTQGMERAGMSKVEIERTRDRVRVDIHTARPGIVIGRRGAEADRIRGDLEKLTGKQVQLNILEVKNPEMDAQLVAQAVAEQLSSRVSFRRAMRKSMQGTLKAGAKGIKIQCGGRLGGAEMSRSEFYREGRVPLHTLRANVDYGFFEAKTTFGRIGVKVWIYKGDVKNIAEVRADNAAARAGNRPARGGGNERPQRRGGERGGERGGRGRRPQTEGAPAGKAEAPAAAEAVAAETPGTEG	1297
rpsC_lf.cluster1045	2	Ga0577617_0008285_8179_9018	Ga0577617_0008285	1	LGITTDFKSRWYADKLYKDYVKEDVAIRRLMTEGMDRAGISKVEIERTRDRVRVDIHTARPGIVIGRRGAEADRIRGKLEKLTSKQVQLNILEVRNPETDAQLVAQGVAEQLSSRVAFRRAMRKAIQTSMKAGVKGIKVQVSGRLGGAEMSRSERYHEGRVPLHTLRANIDYGFYEAKTTFGRIGVKVWIYKGDVTSLSAQRALNAAEARAGRPPREGGGRPGGRDGGRDGGRAPRRDGGAGGRDGGRGPRRDAAPAASAPAEAAAPAEAPAATETKEA	9019
rpsC_lf.cluster1046	3	Ga0577634_0096893_2423_3262	Ga0577634_0096893	1	MGQKVHPESMRVGYIHDWKSNWFNERNFSQFLQEDVKIRAHIIGKLAHAGLSDITIKKDTNEVEVNIHTARPGIVIGKSGSEVDALRKDLHRITRKQVKVNILEIKRPELDAKLVAQSIAEQLQNRVAFRRAMKRALTSAMRSGAKGAKVQVSGRLGGAEMARTESYSDGRVPLHTMRADIDYGFYEARTTFGRIGVKCWINKGEIMPEGYSGADLTDMSAPAPAAADRQDRGGRDGRDGRDGRGRGRGGPGGGRGRGTGPGGGGGGGGRGRGPGGGGR	3683
rpsC_lf.cluster1047	1	Ga0577639_0104506_998_1837	Ga0577639_0104506	1	MGQKVNPHGFRLGITTDFKSRWYADKLYKDYVKEDVAIRKMMTQGMERAGISKVEIERTRDRVRVDIHTARPGIVIGRRGAEADRIRGDLEKLTGKQVQLNILEVKNPETDAQLVAQAVAEQLSSRVSFRRAMRKSMQSTMKAGAKGIKIQCGGRLGGAEMSRSEFYREGRVPLHTLRANVDYGFFEARTTFGRIGVKVWIYKGDVKNIAEVRADNAAARAGNRPARGAGGGGNDRPQRRGGERGGRGRRPQGDAAQAPKAEAVASEAPAAAETPGTEA	2498
rpsC_lf.cluster1048	6	soilwarming_unheated_30-45_052018_S3S8S13_85638_2	soilwarming_unheated_30-45_052018_S3S8S13_85638	1	MGQKIHPTGFRLAVTRNWGSRWYAGNSNFATMLNEDLKVRAYLKAKLKNASVGRVVIERPAKNARITIYSSRPGVVIGKKGEDIEILKSALTKLMGVPVHVNIEEIRKPEADAQLIADSIAQQLEKRIMFRRAMKRAMQNAMRLGAQGIKIMSSGRLNGIEIARKEWYREGRVPLHTLRADIDYGFGEAQTTYGIIGIKVWVYKGDRLANGEAPVIESVGDDDKKRRGPRRDDNKPGARPRPKTAAGAPGAAAPAGAKRVRAKPADTAAVAAPAEKAGE	1698
rpsC_lf.cluster1049	1	Ga0577626_0697707_381_1217	Ga0577626_0697707	1	MGQKIHPTGFRLPVTRNWASRWYANNQNFATMLAEDLKVREYLKAKLKSAAVSRILIERPAKNARITIFSARPGVVIGKKGEDIEALKAELTRRLGVPVAVNIEEVRKPEVDAQLIADSITQQLEKRIMFRRAMKRAMQNAMRLGAQGIKLMSSGRLNGIEIARCEWYREGRVPLHTLKADIDYGFSEAKTTYGIIGVKCWVYRGDRLANGESPGIVTPPGAEDDRRGPRRGPPRGPGGAPGGRGGRPGGGGGYDRGAPRQAAAAPTGDAAAATAAPAP	1217
rpsC_lf.cluster105	2	Ga0577633_0027491_3955_5016	Ga0577633_0027491	1	MGQKVHPESLRVGYIHDWKSNWFNERHFADYLEEDIRIREHIHNKLAHAGLSDITIRKDANEVEVNIHTARPGIVIGKSGSEVDALRRDLHRMTGKAIKVNILEIKRPELDAALVAQSIGEQLQNRVAFRRAMKRALTSAMRSGAKGVRVQVSGRLGGAEMARTEGYSDGRVPLHTLRADIDYGFYEARTTFGRIGVKCWINKGEIMPEGYSGTDLTDVNAPRPGEDRGGRDGGGGGRGGRGGGRGGPGGGGFGGGGRGGGGGRGGGGGGRGGGFGGGGGGGRGGGFGGGGGRGGGGGGGRGGQGGGGRGGGQGGGARGPGSGGGGGRGGRPSQPASAPPSGGAPAPPAEGGS	6398
rpsC_lf.cluster1050	1	Ga0480585_0213930_237_1073	Ga0480585_0213930	1	MGQKVHPESMRVGYIHDWKSTWFNERKFSEYLMEDLHIRDHIENKLGHAGLSEITIRKDANEIEVNIHTARPGIVIGKGGSEVDALRRELHRLTQKQVKVNILEIKRPELDARLVAQSVAEQLQNRVAFRRAMKRALTSAMRSGAKGVKIQVSGRLGGSEMARTEGYSDGRVPLHTLRADIDYGFVEAKTTFGRIGVKVWVNKGEIMPKGFAQDLTELEAPQAVGSGPGGGGGPGGRGGGRGPGGRGPGGPGGPGGRNGGGGPGGRGGRGGGSGGGGGG	1074
rpsC_lf.cluster1051	1	Ga0577635_0216301_115_954	Ga0577635_0216301	1	MRVGYIHDWKSNWFSKKHFSEYLAEDIHVREHITRKLAHAGLSDITIRKDANELEVNIHTARPGIVIGKSGSEVDALRRDLHQMTKKQIKVNILEIKRPELDAKLVAQSIAEQLQNRVAFRRAMKRALTSAMRSGAKGVKVQVAGRLGGAEMARTESYSDGRVPLHTMRADIDYGFYESRTTFGRIGVKCWVNKGEIMPEGYTGADLTDMTAPATQSSDRDGRGGREGRDGRGRGRGGGGPGGGGRGPGGGGRGPGGGGRGPGGGGRGPRSGGPGGGGR	1672
rpsC_lf.cluster1052	1	Ga0577632_0565125_271_1107	Ga0577632_0565125	1	MGQKVHPESMRVGYIHDWKSNWFNERHFAEYLDEDIKIREHIIGKLAHAGLSDITIRKDSNELEVNIHTARPGIVIGKSGSEVDALRRDLHRMTHKQIKVNILEIKRPELDAKLVAQSIAEQLQNRVAFRRAMKRALTSAMRSGAKGVKVQVSGRLGGSEMARTESYSDGRVPLHTMRADIDYGFYEARTTFGRIGVKCWVNKGEIMPEGYTGTDLTDINAPAPPGGERDGRGGRDGRDGRGRGRGGGPGGGRGRSGGGGGGRGSGPGSSRPPRGAGAG	1109
rpsC_lf.cluster1053	2	soilwarming_unheated_30-45_052018_S3S8S13_3478_7	soilwarming_unheated_30-45_052018_S3S8S13_3478	1	MGQKIHPTGFRLAVTRNWGSRWYAGNSNFATMLNEDLKVRAYLKAKLKNASVGRVVIERPAKNARITIYSSRPGVVIGKKGEDIEILKSALTKLMGVPVHVNIEEIRKPEADAQLIADSIAQQLEKRIMFRRAMKRAMQNAMRLGAQGIKIMSSGRLNGIEIARKEWYREGRVPLHTLRADIDYGFGEAQTTYGIIGIKVWVYKGDRLANGDAPVIESVGDDDKKRRGPRRDDNKPGARPRPKTAAGAPGAAAPAAAKRVRAKPADAAAVAAPAEKAGE	6943
rpsC_lf.cluster1054	1	Ga0480590_0106721_3_836	Ga0480590_0106721	1	MGQKVHPESLRVGYIHDWKSNWFNERHFADYLEEDIRIREHIHNKLAHAGLSDITIRKDANEVEVNIHTARPGIVIGKSGSEVDALRRDLHRMTGKAIKVNILEIKRPELDAALVAQSIGEQLQNRVAFRRAMKRALTSAMRSGAKGVRVQVSGRLGGAEMARTEGYSDGRVPLHTLRADIDYGFYEARTTFGRIGVKCWINKGEIMPEGYSGADLTDVNAPRPGDDRGGRDGGGGRGGRGGGRGGPGGGGFGGGGRGGGGGRGGGGGRGGGFGGGGG	1268
rpsC_lf.cluster1055	4	Ga0577635_0053871_1583_2419	Ga0577635_0053871	1	MGQKVHPESMRVGYIHDWKSTWFNEREFSDYLMEDIGIRNHIENKLAHAGLSDITIRKNANEVEVNIHTARPGIVIGKSGSEVDALRRELHRMTGKAVKVNILEIKRPELDAKLVAQSIAEQLQNRVAFRRAMKRALTSAMRSGAKGVKIQVSGRLGGAEMARTEGYSDGRVPLHTLRADIDYGFFEAKTTFGRIGVKVWINKGEIMPKGFAQDLTELEAPQQVGGPGGGPRGGRGGPRGGGGPPRGGGPGGPRGGGGGPRGGGGGPRGGQPPGRGGR	3152
rpsC_lf.cluster1056	3	Ga0577625_0178802_1292_2128	Ga0577625_0178802	1	MGQKIHPTGFRLSVTRNWASRWYAGNGNFAQMLNEDLAARAFLKKKLKNASVGRIVIERPAKNARFTIYSSRPGVVIGKKGEDIEVLKTALTKIMGVPVHVNIEEIRKPEIDSQLIADSISQQLEKRIMFRRAMKRAMQNAMRLGALGIKIMSSGRLNGIEIARKEWYREGRVPLHTLRADIDYGTSEAATTYGIIGVKVWVYKGDRAPNGDAPVIDTPADDKKSRGPRRDDGKPAGRPRPAGAKPTPAGAPAGVRARPAVKVAPAAAAAAPAEKAGE	2182
rpsC_lf.cluster1057	3	Ga0480588_0070174_981_1817	Ga0480588_0070174	1	VGQKINPHGFRLGITTDWKSRWYADKQYAEYVAEDVKIRKLLGRGMERAGISKVEIERTRDRVRVDIFTARPGIVIGRRGAEADRIRGELEKLTKKQVQLNILEVKNPESDAQLVAQGVAEQLSNRVAFRRAMRKAIQSAMRSPQVKGIRVQCGGRLGGAEMSRSEHYRDGRVPLHTLRADIDYGFFEARTTFGRIGVKVWIYKGDVVGGLSARRERDAAPSAADRAPRRDRDARPNRARRSGASGTTPTSTEAGRAAADAQASEAPAAPAAEEKTEG	2239
rpsC_lf.cluster1058	3	Ga0577638_0741566_92_928	Ga0577638_0741566	1	VGQKVNPHGFRLGITTDHVSHWFADSTKAGQRYKDFVREDIRIRQLMSTGMERAGIAKVEIERTRDRVRVDIHTARPGIVIGRRGAEADRIRGELEKLTGKQVQLNILEVKNPEMEAQLVAQGVAEQLTSRVAFRRAMKKAMQSAQRAGAKGIRIACSGRLGGAEMSRSEFYREGRVPLHTLRANIDYGFYEAKTTFGRIGVKVWIYKGDVTAKELAQQAAAAPSRGRGPSDRPGRPGGADRGDRRRRTDRPAADAAPVAAEAPAAEAAAPAAEGGQA	1430
rpsC_lf.cluster1059	4	Ga0577631_0058855_485_1321	Ga0577631_0058855	1	VGQKINPHGFRLGITTDWKSRWYADKQYADYVKEDVAIRRLLSTGLERAGIADVEIERTRDRVRVDIHTARPGIVIGRRGTEADRIRADLEKLTKKQVQLNILEVKNPESVAQLVAQGVAEQLSNRVAFRRAMRKAIQSAMRQPNVKGIRVQCSGRLGGAEMSRSEFYREGRVPLHTLRADIDYGLYEAKTTFGRIGVKVWIYKGDIVGGKRELAAAAPAGADRPRRERPSGTRPRRSGASGTTATSTEAGRAAGAEESAAAESAPAAEPQSTESTES	2840
rpsC_lf.cluster106	2	Ga0577634_0007701_6616_7677	Ga0577634_0007701	1	MGQKIHPVGLRLGITRTWDSRWFEKKNYVSWLHEDVAIRKYFGRMTRAAAISRVEIERRANQARVIINTGKPGIIIGKRGVGIDEIRRNLEKLTGKQVQVNVVEIKVLELDARLVGQNIVDQLEKRIAFRRAMKQAIMRTMKAGARGVKVQVSGRLGGAEIARTERNHDGKVPLHTLRADIDYAHVEAFTTFGRIGVKVWIYKGEVLPDQPRGERDGAGARAQGGDAARFRDNRRGTRGGRGRGGEGGGGGGRGPRPAGAPGQERNAPGLDTTEAMHVAQADNQSLESVIDGAPSAAGNKPDAPHAGAVTHDPNAQHGHGVTTETSVVPPETQRTVDAAERSNVSESTQNEGQ	11786
rpsC_lf.cluster1060	1	Ga0577638_0058926_4439_5275	Ga0577638_0058926	1	VGQKINPHGFRLGITTDWKSRWYADKQYAEYVKEDVAIRRLLSSGLERAGIADVEIERTRDRVRVDIHTARPGIVIGRRGTEADRIRADLEKLTAKQVQLNILEVKNPESQAQLVAQGVAEQLSNRVAFRRAMRKAIQSAMRQPNVKGIRVQCSGRLGGAEMSRSEFYREGRVPLHTLRADIDYGLYEAKTTFGRIGVKVWIYKGDIVGGKRELAAPSSAGAERPRRERPSGSRPRRSGAAGTTATSTDAGRAASGAEEAASAPSADEPAVEAQSTES	5493
rpsC_lf.cluster1061	1	Ga0577638_0000341_26605_27441	Ga0577638_0000341	1	MENRIWIWGINHFVAPDSSLEKRIRFFVESLTAKTRSAAEPYPARSGHYLDFLRSLLFPLLGATLFFLMENEMRGGKIKKRKRKRNARRKKLLGQLGRVLRNRLGSTRLVEQFTDLGGLVRRRIGMMIRIIPKNRRIPYGYNYYLNEVRKMRSLLSGGTNANTFIGSVKIKYVYQSASPIAQDISFQPRDGTRSFRSIFWKIVRNLSLVMPKLRKGVGGIRICRPGRLKGAEIARTECREYGKTSCNTFRHQIDYAYAKVSTRYGILGVKVWIPFPRG	45505
rpsC_lf.cluster1062	2	Ga0577637_0223411_440_1273	Ga0577637_0223411	1	LGHKVHPNGFRLGVYRNWEAKWFAPDKEYKPLLLEDVRLRRMLLARLKNAGVARIETERSSSALTITLHTAKPGIVIGKGGTSVDQLRDELEKTTGKRVRVTIQEIKKPELSAQLVAENVAAQLEKRIAFRRAIKQSLMKTMRAGAQGVKIRVRGRLGGSEMARVEWNREGRVPLHTLKADIDFGQTEAKTTFGRIGVSAWVYTGNFPTEAPPKPAAAVEEPVEAGIPVGAAIGDATSPLAELAQAVAPTPAPVAVEPAPVPAPVATTEAPAAKPKRA	1273
rpsC_lf.cluster1063	2	Ga0480588_0003420_4284_5117	Ga0480588_0003420	1	MGQKVHPIGFRLGISTDWKSRWYADKLYKDYIGEDVKIRKMMSKGLERAGISKVEIERTRDKVRIDIHTARPGIVIGRKGAEADRLRTELEKLTGKQVQLNILEVKSPESDAQLVSQGVAEQLSGRVAFRRAMRKAMQSAMKNPLVRGIRIQVSGRLGGAEMSRTEFYREGRVPLHTLRANIEYGFFEARTTFGRIGVKVWIYKGDAVPGREIQQDAGRPRRGERPERADRPRRGRSGASGTTGAGTEAGRAAAAELTKESSAEAAPVAAVAETQEG	9149
rpsC_lf.cluster1064	3	Ga0577634_0042650_1245_2078	Ga0577634_0042650	1	MRVGYIHDWKSNWFNERQFAAYLLEDMKVRDHIINKLAHAGLSDITIRKNANELEVNIQTARPGIVIGKSGSEVDALRKDLHRMTKKQIKVNILEIKRPELDAKLVAQSIAEQLQNRVAFRRAMKRALTSAMRSGAKGVKVQVSGRLGGAEMARTEMYSDGRVPLHTMRADIDYGFYEARTTFGRIGVKCWINKGEIMPEGYTGADLTDMNAAPPPGADRDGRDGRDGRDRGGRGRGRGGNGPGGPGGRRGGGGPGGRGGPGGQGGRGGGPGRGGPR	5479
rpsC_lf.cluster1065	3	soilwarming_3_unheated_10-20_052016_S37_2742_3	soilwarming_3_unheated_10-20_052016_S37_2742	1	MGQKINPHGFRLGITTDWKSRWYADKQYAEYVAEDVKIRKLLGRGMERAGISKVEIERTRDRVRVDIHTARPGIVIGRRGAEADRIRGELEKLTKKQVQLNILEVKNPESDAQLVAQGVAEQLSNRVAFRRAMRKAIQSAMRSPQVKGIRVQCGGRLGGAEMSRSEHYRDGRVPLHTLRADIDYGFFEARTTFGRIGVKVWIYKGDVVGGINAKRERDAAPAADRAPRRDRDARPNRARRSGASGTTPTSTEAGRAAADAQASETPAAPAAEEKTEG	3836
rpsC_lf.cluster1066	2	Ga0577643_00899656_312_1142	Ga0577643_00899656	1	VGHKVHPNAFRLGLFRPWDAKWYADRDYTRLVHEDMELRRRIQQRLSNAGVPKVEIERSPTQVTLTVHTAKPGIVIGKSGQSVDVLRQELEKLTGKKVRINIQEIKHAELEATLVAESVASQLEKRIAFRRAIKQAVAKTMRMGAQGVRVQVAGRLGGSEMSRREWDREGRVPLHTLKANIDYGRAEAHTTFGRIGVKCWIYRGDVTPLTYVRQKTAVTLDDEPVLAPPRESARPAPAAVEAEPVGAGSGLGEALAGTAPELAAAVAEREAPPAPAE	1142
rpsC_lf.cluster1067	4	Ga0577623_0018057_4583_5413	Ga0577623_0018057	1	MGQKTNPIGFRLGIIRGWDSSWFGGKGFSEKLVEDQKIRKYVDARIQKGGISKVVIERTLKRITLTIHTARPGVVIGKGGNEVDKIKEELKKITKKDVQINIFEIKRPELDAKLVGESIAQQLEARISYRRAMKQAIASAMRVGAEGIKVKVSGRLAGADMARSEQYKEGRIPLHTLRADIDYAISEAQTVYGKIGIKVWIFKGEVYGKRDLSPNIGMINSPAGENKGGGQGGERRGGGRGERNERGGGDRRGGDRGGDHRGGGNRGGGGAGRPKR	6101
rpsC_lf.cluster1068	3	soilwarming_3_heated_80-90_052016_S48_2139_4	soilwarming_3_heated_80-90_052016_S48_2139	1	MGQKVNPHGFRLGITTDFKSRWYAEKKYKDYVAEDVAIRRMLQRGMERAGISKVEIERTTDRVRVDIHTARPGIVIGRRGAEADRIRGDLEKLTAKQIQLNILEVKNPEVDAQLVAQGVAEQLSSRVSFRRAMRKAMQSALKGGAKGIRVQCSGRLGGAEMSRSEFYREGRVPLHTLRADIDYGFYEARTTFGRIGVKVWIYRGDAAPTRAAREAQQAALRAGQQRSRPGDRDRPQQRRRRGGDRPDGRPDGRNDRPDRSQAPASAAEAPATTGEG	3398
rpsC_lf.cluster1069	1	Ga0577639_0024932_2960_3790	Ga0577639_0024932	1	MGQKTNPVGFRLGIIRGWDSSWFGGKGFSEKLVEDQKIRKYVDARIQKGGISKVVIERTLKRITLTIHTARPGVVIGKGGNEVDKIKEELKKITKKDVQINIFEIKRPELDAKLVGESIAQQLEARISYRRAMKQAIASAMRVGAEGIKVKVSGRLAGADMARTEQYKEGRIPLHTLRADIDYAISEAQTVYGKIGIKVWIFKGEVYGKRDLSPNIGMINSPAGENKGGGQGGERRGGGRGERNERGGGGDRRGGGDRGGDHRGGPNRGGGPRPKR	4551
rpsC_lf.cluster107	1	Ga0577638_0279210_500_1561	Ga0577638_0279210	1	MGQKVNPYGFRLGVTTDWKSRWFEERHYRDFVVEDWKIRDFLMTQLEAAAVSRIEVERTRDRLRVDIYTARPGIVIGRRGSEADRLKKTLEEITGLQNRIQLNIQEIKQPELDAALIAQGICDQLVRRVAFRRAMKRAIQTVQKAGAQGVRVQCSGRLGGSEMSRKESYREGRVPLHTLRADIDYGFREAKTNSGRVGVKVWIYKGDILPYKVSVEDKITREAAMAVGETSGQGRPRRLITAGGGRRRLDQPEPGAVPLADEADGIDGIDGIEEVEEVEEVDEVEAVEGAAPVDVGADLDAVEPSTPAEEPVSDLIAPPAVPDELERRLAEDEEIERRNRHEHREAPHFRRED	2507
rpsC_lf.cluster1070	1	Ga0577626_0766202_322_1149	Ga0577626_0766202	1	MGQKVNPYGFRLGITTDWKSRWFAENKEYTESLIEDWKIRDYLRKQLERAAVSRVEIERTRDRLRIDVYTARPGIVIGRRGAEADRLRADLAKITGNPKIHFNIQEIKQPELDAMLIAQGVADQLAGRVSFRRAMKRAVQTAMKAGAQGIRVQCGGRLGGAEMSRKEWYREGRVPLHTLRADIDYGAAEARTTFGRIGVKVWIYKGEILPYKSAADDKISREAAMAVGETSGEAPPRRRVVSAGGGRRRNEETVEVSAETVTDEPAAEAQPLVKEA	1150
rpsC_lf.cluster1071	6	Ga0577619_01500603_23_853	Ga0577619_01500603	1	VGQKVNPHGFRLGITTDFKSRWYAEKKYKDYVAEDVAIRRMLQKGMERAGISKVEIERTTDRVRVDIHTARPGIVIGRRGAEADRIRGDLEKLTAKQIQLNILEVKNPEVDAQLVAQGVAEQLSSRVSFRRAMRKAMQSATKGGAKGIRVQCSGRLGGAEMSRSEFYREGRVPLHTLRADIDYGFYEARTTFGRIGVKVWIYRGDAAPTRAGREAQQAALRAAGAGQRRDRDSGRPAAGQRRPRRDRPDGRPEGRGDRPERTASAAEPSAETSGEG	1034
rpsC_lf.cluster1072	1	Ga0577618_0316001_960_1790	Ga0577618_0316001	1	MGQKTNPIGFRLGIIRGWDSSWFGGKGFSEKLVEDQKIRKYVDARIQKGGISKVVIERTLKRITLTIHTARPGVVIGKGGNDVDKIKEELKKITKKDVQINIFEIKRPELDAKLVGESIAQQLEARISYRRAMKQAIASAMRVGAEGIKVKVSGRLAGADMARSEQYKEGRIPLHTLRADIDYAISEAQTVYGKIGIKVWVFKGEVYGKRDLSPNIGMINSPAGENKGGGQGGERRGSGRGERNERGGGDRRGGDRGGDHRGGGNRGGGGAGRPKR	1856
rpsC_lf.cluster1073	2	Ga0577640_0096966_1001_1831	Ga0577640_0096966	1	VGQKINPHGFRLGITTDWKSRWYADKQYSEYVKEDVAIRRLLSSGLERAGIADVEIERTRDRVRVDIHTARPGIVIGRRGTEADRIRADLEKLTGKQVQLNILEVKNPESQAQLVAQGVAEQLSNRVAFRRAMRKAIQSAMRQPNVKGIRVQCSGRLGGAEMSRSEFYREGRVPLHTLRADIDYGLYEAKTTFGRIGVKVWIYKGDIVGGKRELAAAAPAGAERPRRERPTGTRPRRSGASGTTATGTDAGRAAGEESAAAPADGAPALEPQSTES	2291
rpsC_lf.cluster1074	1	Ga0577631_0111369_1278_2108	Ga0577631_0111369	1	SRIEIERTRDRLRIDVHTARPGIVIGRRGAEADRLRTKLAEITKNPKVQLNIQEIKQPELDAALNAQGIADQLQGRVSFRRAMKRAVQTVQKAGAQGIRVQCAGRLGGSEMSRREFYREGRVPLHTLRADIDYGFREARTTFGRIGVKVWIYKGDILPYKTSTEDKISREAAMAVGETSGQSRPRRVISAGGGRRRPDLGEPGAPAPAPEPAAEEPAATEGAAAEGAAAEAAEEAAEAQPIVSVDPELERLLAEEEEIERRTRGDHHETPHFPKDA	2109
rpsC_lf.cluster1075	5	Ga0577625_0000171_63744_64574	Ga0577625_0000171	1	MGQKINPHGFRLGITTDWKSRWYADKQYAEYVKEDVEIRKMLSKGMERAGISKVEIERTRDRVRVDIHTARPGIVIGRRGAEADRIRGQLEKLTKKQVQLNILEVKNAESDAQLVAQGVAEQLSNRVAFRRAMRKAIQSAMRSPQVKGIRVQCSGRLGGAEMSRSEFYREGRVPLHTLRADIDYGLFEARTTFGRIGVKVWIYKGDIVGGRREGVAAAAPSADRAPRRERPQRRRSGASGTTGTSTEAGRAAAEQSAGGSAATATVEAPAEPGGEG	82886
rpsC_lf.cluster1076	7	Ga0577621_0010943_1371_2201	Ga0577621_0010943	1	MRVGYIHDWKSNWFNDRNFAEYLAEDVRIREHIVRKLAHAGLSDITIRKDSAELEINIHTARPGIVIGKSGSEVDALRRELHRMTSKQIKVNILEIKRPELNASLVAQSIAEQLQNRVAFRRAMKRALTSAMRSGAKGVKVQVAGRLGGAEMARTESYSDGRVPLHTMRADIDYGFYEARTTFGRIGVKCWVNKGEIMPEGYTGTDLTDLTAPATPSSERDGRGGPNGRDGRGRGRGGGGGGRRGSSGRGGQPAAGSGRPAAPDGADRARRSQGQR	6266
rpsC_lf.cluster1077	4	Ga0577626_0571058_508_1338	Ga0577626_0571058	1	MTRMSDAGVSKVEIERSANMITVTIHAAKPGIVIGKSGVKVEELRRTLEAMTGKRIRVTIQEIRQPEIDAFLVARSIADQLEKRVAFRRAMKQAVQRAQRFGAKGVRVQVSGRLGGSEMSRREWDRWGRVPLHTLRADIDYGQTEAHTTYGIIGVKVWIYRGDFTPDGRSPEEVAAEQRQPDRRGPRATVRAEVPEAPAPEVAPPAVPAEIDYSLGGVFDPGEESGELKPRGQRTEPEAAAPQPPAPPTRPAPTPPTPPSPSTRTEGTGPSSRTEE	1373
rpsC_lf.cluster1078	2	Ga0577634_0699916_407_1234	Ga0577634_0699916	1	MGQKVHPESIRVGYIHDWKSNWFNEKNFSDYLHEDTEIRKHIIGRLSHAGLSDITIRKNATEVEVNIHTARPGIVIGKSGSEVDQLRRDLHRITNKQVKVNILEIKRPELDARLVAQSIAEQLQNRVAFRRAMKRALTSAMRSGAKGVKVQVSGRLGGAEMARTEGYSDGRVPLHTLRADIDYGFHEARTTFGRIGVKCWINKGEIMPEGYTGADLTSMDEPPSNAPERGGRDGREGRGRGRGGPGGRGGSGGGPGGPGGRGGGAGGSGSRGGGAG	1235
rpsC_lf.cluster1079	2	Ga0577633_0300192_633_1463	Ga0577633_0300192	1	MRVGYIHDWKSNWFSDRNFAEYLREDVRIREHIVRKLAHAGLSDITIRKDSGELEINIHTARPGIVIGKSGSEVDALRRELHRMTNKQIKVNILEIKRPELNASLVAQSIAEQLQNRVAFRRAMKRALTSAMRSGAKGVKVQVAGRLGGAEMARTESYSDGRVPLHTMRADIDYGFYEARTTFGRIGVKCWVNKGEIMPEGYTGSDLTDLSAPPPPQSERGGRGGRDGGEGRSRRGGGGRERGGARGGARGGQAGAGSTRAVVDAVDGSGAAGGER	1872
rpsC_lf.cluster108	1	Ga0577633_0089324_256_1317	Ga0577633_0089324	1	VGQKVHPESLRVGYIHDWKSNWFNERNFHAYLGEDLRIREHIVGKLAHAGLSDITIRKDANEVEVNIHTARPGIVIGKSGSEVDALRRDLHQMTSKQIKVNILEIKRPELDAKLVAQSIAEQLQNRVAFRRAMKRALTSAMRSGAKGVKVQVSGRLGGAEMARTEGYSDGRVPLHTLRADIDYGFHEARTTFGRIGVKCWINKGEIMPAGYTGADLTELEAPAPASTGGGGGDRGRGRGGRDGGPGGPGRGGPGGPGRGGPGGSGRGGAGRGGPGGAGRGGPGGPGTRGRGGAGGAGSGRGPGGPGRGGAGGPGRGRGNGGGGRGPGGSGGPPSGGRGGAPRGGGRPGSGGGG	3593
rpsC_lf.cluster1080	1	Ga0577642_0149497_1477_2301	Ga0577642_0149497	1	VGQKIHPGGMRVGVIHDWKSNWYTGAKEFPQYLLEDVRIREHIYKKLAHAGLSDILIRKDKQRITVDIYTARPGIVIGKSGVEVDALRRELHALTQKNVHININEIKRPELDAKLVAQSIAEQLSNRVAFRRAMKRALASAIRSGAAGVKIQCSGRLGGGEMSRRETYNEGRVPLHTIRADIDYGFVEARTSAGRIGVKVWINKGEIMPEGYESVTGGEQRLGDQDARRRRGGATEGLGASRESGRGRSQDREGLGPVKRRRGPGGPAGAAGGGG	2301
rpsC_lf.cluster1081	2	Ga0577634_0001125_16285_17112	Ga0577634_0001125	1	MRVGYIHDWKSNWFTDRHFAEYLAEDVRIREHITRKLAHAGLSDITIRKDSGELEINIHTARPGIVIGKSGSEVDALRRELHRMTNKQIKVNILEIKRPELNAALVAQSIAEQLQNRVAFRRAMKRALTSAMRSGAKGVKVQVAGRLGGAEMARTESYSDGRVPLHTMRADIDYGFYEARTTFGRIGVKCWVNKGEIMPEGYTGSDLTDLTAPAAPTSDRDGRGGRDGRDGRGRGRGGGQSRRRPPRSGGQSPAGPGGDSQAEDTTASGSPEVER	26874
rpsC_lf.cluster1082	1	Ga0577621_0000011_95418_96245	Ga0577621_0000011	1	MRVGYIHDWKSNWFNERNFAEYLAEDIKVREHIIAKLAHAGLSDITIRKDSNDLEVNIHTARPGIVIGKSGAEVDALRRDLHSMTKKQIKVNILEIKRPELDAKLVAQSIAEQLQNRVAFRRAMKRALTSAMRSGAKGVKVQVSGRLGGAEMARTESYSDGRVPLHTMRADIDYGFYEARTTFGRIGVKCWVNKGEIMPEGYTGADLTDMSAPAPPSGDREGRGGRDGRDGRGRGRGGPGGGGRGAGGSGSGGRGPGGGRGGRGPSGGSDRGGMR	136176
rpsC_lf.cluster1083	5	Ga0577633_0049437_2850_3677	Ga0577633_0049437	1	VGQKVNPHGFRLGITTDFKSRWYAEKKYKDYVAEDVAIRRMLQKGMERAGISKVEIERTTDRVRVDIHTARPGIVIGRRGAEADRIRGDLEKLTAKQIQLNILEVKNPEVDAQLVAQGVAEQLSSRVSFRRAMRKAMQSATKGGAKGIRVQCSGRLGGAEMSRSEFYREGRVPLHTLRADIDYGFYEARTTFGRIGVKVWIYRGDAAPTRAGREAQQAALRAAGAGQRRDRDRPGAGGGQRRPRRDRPEGRPSADRPERTSAPAAEPQAETTGEG	4838
rpsC_lf.cluster1084	3	Ga0480588_0096386_922_1749	Ga0480588_0096386	1	VGQKVNPHGFRLGISTDHKSRWFADSTKSGQRYSDYVKEDVAIRRLMSKGMERAGISRVEIERTRDRVRVDIHTARPGIVIGRRGAEADRIRGDLEKLTGKQVQLNILEVKNPEVDAQLVAQGVAEQLASRVSFRRAMRKSMQSTMKAGAKGIRVQCSGRLGGAEMSRSEFYREGRVPLHTLRANIDYGFYEAKTTFGRIGVKVWIYKGDAQGNRAEREAAQAAARLAQRQRPARATRRPGRDEGAAPEAPVAAGAVATEAPAPTDSTPTSGTEA	1891
rpsC_lf.cluster1085	1	Ga0577619_01101474_429_1253	Ga0577619_01101474	1	MGQKVHPGGMRVGVIHDWKSNWYTGKKEFPGYLIEDIKIREHITNKLSHAGLSDILIRKDKQRVTVDIYTARPGIVIGKSGVEVDALRKELHAITKKNVHININEIKRPELDAKLVAQSIAEQLQNRVSFRRAMKRALASGIRSGAKGVRIQCGGRLGGTEMSRSEAYSEGRVPLHTIRADIDYGFVEAKTTFGRIGVKVWINKGEIMPEGYGGLDTEKDVRLGEQDQARRRRANVEGLGASREGGRDRQRDREGLGPVRPGRKRSGQGRGAGLP	1254
rpsC_lf.cluster1086	8	Ga0577617_0049137_701_1528	Ga0577617_0049137	1	MLHEDLEMRRIILARLRNAGIAKIETERSSNAQLTVTIHTAKPGIVIGKGGSSVDQLREDLEKRFGNRVRISIQEIKQPELDAQLVAENIASQIERRISYKRAMKQAILRTMRAGAKGVRIYCGGRLRGAEMARREWDREGRVPLHTLRADIDFGRATAKTTFGAIGVKCWIYKDQISPAKRRLPTAEETPIAEQPIAPQPELVDAVAGPVPSAEPDVQPVAVEAPAPAPRRTRTTAAPKADATPKAPARAKAAPKPKASSPAKKTTRTTKKADS	4126
rpsC_lf.cluster1087	1	Ga0577620_0201589_1_825	Ga0577620_0201589	1	VFRPWEANWFANPKDYTKMLHEDLEMRRVILARLRNAGIAKIETERSSNAQLTVTIHTAKPGIVIGKGGASVDQLREDLEKRFGNRVRISIQEIKQPELDAQLVAENIASQIERRISYKRAMKQAILRTMRSGAKGVRIYCGGRLRGAEMARREWDREGRVPLHTLRANIDFGRATANTTFGAIGVKCWIYKDVAVPLKKLTPVSDGTPIAEAIAPQPEAPEVLAEPQILIEAAAVPAAVTDGALTAAPKRTRVAAKPATEAPAVEIETQAPKAK	1385
rpsC_lf.cluster1088	3	Ga0480453_000109_5151_5978	Ga0480453_000109	1	MGQKTNPIGNRLGIIRGWESNWYASRKDFSSRLIEDTRIRTYLTARINKGGISKIVIERTLGKLIITIHTSKPGIIIGKGGGEVDRIKEELKKLTGKDDVQINILEIRRPELDAMIVADTIAKQIENRINFKRAIKMAIASALRMGAEGIKVKASGRLGGAEIARSEEIKQGRTPLHTLRMDIDYANVFALTVYGKIGIKVWICKGEILTKRDLNPNFVSGKNEGPGGERRPDRRDERPDRRDDRRGGGGGDRRQPGGGGGDRRGGGPGAGGRRN	5980
rpsC_lf.cluster1089	2	Ga0577618_0822209_141_968	Ga0577618_0822209	1	VGYIHDWKSNWFNERHFADYLHEDTQIRGHIVGRLSHAGLSDITIKKNATDVEVNIHTARPGIVIGKSGIEVDQLRRDLHRITGKQVKVNILEIKRPELDARLVAQSIAEQLQNRVAFRRAMKRALTSAMRSGAKGVRVQVSGRLGGAEMARTEGYSDGRVPLHTMRADIDYGFHEARTTFGRIGVKCWINKGEIMPEGYKHSDLTSMDEPAPQAADRREGRPGRDGRGRGGPGDGRGRGGPGDGRGGRGGGRGPRGGARGPGQEGGSGAPEVTR	1064
rpsC_lf.cluster109	1	Ga0577632_0003301_1907_2968	Ga0577632_0003301	1	MGQKVHPIGFRLGVYRNWDARWYADKDYTKLLHEDLAMRRLIGSRLRNAGLARIETERSANQLTIIIQTAKPGIVIGKQGASVDALRDELERISGKKVRVTIHEIKTPELDAKLVAENVASQLEKRIAFRRAMKQAIMRTMRAGAKGVKVQVSGRLGGSEMSRREWDRDGRVPLHTLRANIDYGFTEARTTFGRIGVQVWLYKGDFVTATGEQILPGGAVQAPQPEEPPAEVAEPVVAAAAAAETQPAVAEEPAEVEAPVATAAAVVEAPEAEAETEAAEALELGETEEEAEPEEEIETDEDLVGALDLPDTEPAGTTKVGSTKRKPPAGRKPSPSRAKKLPEPAAGLAEEEE	14292
rpsC_lf.cluster1090	4	Ga0577622_0212945_722_1549	Ga0577622_0212945	1	MRVGYIHDWKSNWFNERQFAAYLQEDMKVRDHITNKLAHAGLSDITIRKNANELEVNIQTARPGIVIGKSGSEVDALRKDLHRMTRKQIKVNILEIKRPELDAKLVAQSIAEQLQNRVAFRRAMKRALTSAMRSGAKGVKVQVSGRLGGAEMARTEMYSDGRVPLHTMRADIDYGFYEARTTFGRIGVKCWINKGEIMPEGYTGADLTDMNAAPPPGAERDGRDGRDGRDRGGRGRGRGGNGPGGPGGRRGGGGGPGGRGGQGGRGGGPGRGGPR	1575
rpsC_lf.cluster1091	3	Ga0577625_0000135_81472_82299	Ga0577625_0000135	1	MGQKIHPEGFRVGYIHDWKSTWFEEKNFADVLQEDLQIRDHIVAKLSHAGLSNITIERRGEVAVDIHTARPGIVIGKSGSEVDALRKELHKLTGSPVKVNIREVKRPELDAKLVAQSIAEQLQNRVAFRRAMKRALTSAMRSGAKGVKVQVSGRLGGAEMARTESYSDGRVPLHTLRADIDYGFFEARTTTGRIGVKCWINKGEVMPEGFRSDLASTDDEPQGGQRGGRPGGRPGGDRGPGGGRSGGGRGPGGGGRGPGGGRGGDRGGQRGGGGR	97010
rpsC_lf.cluster1092	1	Ga0577632_0179746_647_1474	Ga0577632_0179746	1	MRVGYIHDWKSNWFTDRNFAEYLAEDVRIREHITRKLAHAGLSDITIRKDSGELEINIHTARPGIVIGKSGSEVDALRRELHRMTNKQIKVNILEIKRPELNAALVAQSIAEQLQNRVAFRRAMKRALTSAMRSGAKGVKVQVAGRLGGAEMARTESYSDGRVPLHTLRADIDYGFYEARTTFGRIGVKCWVNKGEIMPEGYTGSDLTDLTAPAAPNSDRDGRGGRDGRDGRGRGRGGGQSRRRPPRSGGQSPAGPGGDSQAEGTTASGSPEVQR	2148
rpsC_lf.cluster1093	1	Ga0577621_0006086_2607_3434	Ga0577621_0006086	1	MGQKVHPESMRVGYIHDWKSNWFSDRNFAAYLAEDVQIRRHITGKLAHAGLSDITIRKDANELEVNIHTARPGIVIGKSGTEVDALRRDLHRMTRKQIKVNILEIKRPELDAKLVSQSIAEQLQNRVAFRRAMKRALTSAMRSGAKGVKVQVSGRLGGAEMARTESYSDGRVPLHTMRADIDYGFYEARTTFGRIGVKCWINKGEIMPEGYTGADLTDMTGPAPPSSDRGDRSDRDGGGRGRGGRGGGRGERPGRGGGGRGPGPGRSGRPGEERR	8040
rpsC_lf.cluster1094	1	Ga0577625_0093835_2165_2989	Ga0577625_0093835	1	MGQKVNPNGFRLGITTEHKSRWFADSTKEGQRYRDYVKEDVAIRKLMSEGMERAGISRVEIERTRDRVRVDIHTARPGIVIGRRGAEADRIRGELEKLTGKQVQLNILEVKNPEVDSQLVAQGIAEQLSARVSFRRAMRKGMQSATRAGAKGIRVQVSGRLGGAEMSRTEFYREGRVPLHTLRAQIDYGFYEARTTFGRIGVKVWIYKGDVTARELAQQQAAAPRPSRGPRRDGADRPARARRERPEATGTETAAEAPAAEATAAAASTEGEQS	3037
rpsC_lf.cluster1095	1	Ga0577631_0087930_407_1231	Ga0577631_0087930	1	VGQKVNPHGFRLGITTDFKSRWYAEKKYKDYVAEDVAIRRMLQKGMERAGISKVEIERTTDRVRVDIHTARPGIVIGRRGAEADRIRGDLEKLTAKQIQLNILEVKNPEVDAQLVAQGVAEQLSSRVSFRRAMRKAMQSATKGGAKGIRVQCSGRLGGAEMSRSEFYREGRVPLHTLRADIDYGFYEARTTFGRIGVKVWIYKGDAAPTRAGREAQQAALRAAQQRTGGGGGGGRERPQARRPRRGDRPDNRSDRPERTSAPAAEPQAESNGEG	2359
rpsC_lf.cluster1096	41	soilwarming_unheated_30-45_052018_S3S8S13_15973_2	soilwarming_unheated_30-45_052018_S3S8S13_15973	1	MGQKIHPIGLRVGIIRDWESRWYAKKMAPLILEDLTIRTHIKKKLSRAGISRVEIERFGTQSGVGGKSQVRVIIHAARPGIIIGRGGTGIDALKKELDEMTGKQVQLNVQEIRRPELEALLVAENVAQQLERRVAYRRAMKQAVQRSLRAGAKGIRISCSGRLAGSEIARYEWYREGRVPLHTLRADIDFGIAEALTTYGRIGVKVWVYRGEILPERRLETELRRPPRPFDRAGGPPSEPAPVSGGATEPDRTVVIPTKVPRPVVIRRPSDDGA	3667
rpsC_lf.cluster1097	1	Ga0577617_0426861_2_823	Ga0577617_0426861	1	VFRPWEANWFANPKDYTKMLHEDLEMRRVILARLRNAGIAKIETERSSNAQLTVTIHTAKPGIVIGKGGASVDQLREDLEKRFGNRVRISIQEIKQPELDAQLVAENIASQIERRISYKRAMKQAILRTMRSGAKGVRIYCGGRLRGAEMARREWDREGRVPLHTLRANIDFGRATASTTFGAIGVKCWIYKDVAAPLRKQPVAAETTAPIAEMAPQPELADVLAAQPQAVVEVAAPEVEVLTPTAAPKRARATTTAKPKAEPKAKAEVKTETK	1380
rpsC_lf.cluster1098	1	Ga0577628_0255549_26_850	Ga0577628_0255549	1	MRVGYIHDWKSNWFNERQFAAYLQEDMKVRDHITNKLAHAGLSDITIRKNANELEVNIQTARPGIVIGKSGSEVDALRKDLHRMTRKQIKVNILEIKRPELDAKLVAQSIAEQLQNRVAFRRAMKRALTSAMRSGAKGVKVQVSGRLGGAEMARTEMYSDGRVPLHTMRADIDYGFYEARTTFGRIGVKCWINKGEIMPAGYTGADLTDMNAAPPPGAERDGRDGRDGRDRGGRGRGRGGNGPGGPGGRRGGGGPGGRGGQGGRGGGPGRGGPR	1208
rpsC_lf.cluster1099	1	Ga0577632_0189304_353_1177	Ga0577632_0189304	1	MGQKVHPESMRVGYIHDWKSNWFSDRNFAAYLAEDVQIRRHITGKLAHAGLSDITIRKDANELEVNIHTARPGIVIGKSGTEVDALRRDLHRMTRKQIKVNILEIKRPELDAKLVSQSIAEQLQNRVAFRRAMKRALTSAMRSGAKGVKVQVSGRLGGAEMARTESYSDGRVPLHTMRADIDYGFYEARTTFGRIGVKCWINKGEIMPVGYTGADLTDMTGPAPPSSDRGDRSDRDGGGRGRGGRGGRGERPGRGGGGRGPGPGRSGRPGEERR	2090
rpsC_lf.cluster11	2	Ga0577631_0047328_1371_2570	Ga0577631_0047328	1	MGQKIHPGGLRVGVIHDWKSNWYTGKKEFPAYILEDVKIREHIYRKLSHAGLSDILIRKDKQRITVDIYTARPGIVIGKSGVEVDALRRELHAITQKNVHININEIKRPELDAKLVAQSIAEQLSNRVAFRRAMKRALASAIRSGAAGVKIQCAGRLGGGEMSRSETYNEGRVPLHTIRADIDYGFVEARTSAGRIGVKVWINKGEIMPAGYEGIQQGDQRLGDQDTRRRRGGATEGLGASRESGRGRGPDREGLGPVKRRRGPGGGAGGAGGGGGGRGPGGRPGGAGRGPGGPGSGGRGPGGQGGGGGGGRGPGGQGGAGGGGRGRGPAQGSRPAAGRQRPQENVEKPKTDDNAVSAEGREQPVIQPEVETTPKPVADAPDTTSNQDPSAKSDKDGDS	3128
rpsC_lf.cluster110	4	Ga0577621_0234329_167_1225	Ga0577621_0234329	1	LGHKVHPNAFRLGVYRTWEANWFALDKDYTKLLHEDLAMRGLIMGRLRNAGIARIETERSSNAQMTVTIHTAKPGIVIGKGGASVDKLREDLEKQFGNRVRISIQEIKQPELDAQLVAENIASQLERRISHRRAMKQSILRTMRSGAKGVRIAMAGRLRGAEMARREWDREGRVPLHTLRADIQFGRATAKTTFGMIGIKVWIYRDMVKGRTRGGETQATIAPQPTEAEVANAQQAAQQGGPGGPGGRPGGQRPRRRGGRGRTGGGGQGGQGQGGQSSGGQSQGSQGSGGQSQGGQAGGGQGQSGQGQSGQGQSGQGQSGQGQSGQGQSGQGQSGQGQARSDGGREGGSAPA	1491
rpsC_lf.cluster1100	1	Ga0577643_00582577_2_826	Ga0577643_00582577	1	EDWKIRDYLKRQLERAAVSRVEIERTRDRLRVDVYTARPGIVIGRRGAEADRLRAGLLKITGNPKIHFNIQEIKQPELDATLIAQGVADQLTGRVSFRRAMKRAVQTAMKAGAQGIRVQCSGRLGGAEMSRKEWYREGRVPLHTLRADIDYGEAEAKTTFGRIGVKVWIYKGEILPYKSAAEDKIQKEAAMAVGETSGQGPQRRVVSAGGGRRRPAGEATQVEGTPDETPEEATPLVKEADPELERLLAEEEEIERRTRQGQHHEAPKFHGDED	1450
rpsC_lf.cluster1101	3	Ga0577619_00015951_7127_7951	Ga0577619_00015951	1	VGQKVNPHGFRLGITTDFKSRWYADKLYKDYVAEDVAIRRMLQRGMERAGISKVEIERTRDRVRVDIHTARPGIVIGRRGAEADRIRSDLEKLTSKQIQLNILEVKNPEADAQLVAQGVAEQLSSRVSFRRAMRKAMQTAMKGGAKGIRVQCSGRLGGAEMSRSEFYREGRVPLHTLRADIDYGFYEARTTFGRIGVKVWIYRGDAPSTRAEREALQAALRAGGQRRDRDSGRPDSGRPPPRRRRGEGPGSDDAAARAVAAAPVEVAAGAGEEG	9921
rpsC_lf.cluster1102	2	soilwarming_3_heated_60-80_052018_S30_31368_2	soilwarming_3_heated_60-80_052018_S30_31368	1	MGQKANPIGNRLGIIRGWESNWYGNKRDYAGKLIEDQKIRTYLNARINKGGISKIVIERTLGKLIITIHTSKPGIIIGKGGGEVDRIKEELKKLTGKDDVQINILEIRRPELDAMIVADTVARQIENRINYKRAIKMSIASALRMGAEGIKVKVAGRLGGAEIARTEEIKQGRVPLHTFRMDIDYANVFALTVYGKIGIKVWICKGEVLAKRDLNPNFIGGKGEAGERRERRDDRHERHDRRDDRRGGGGGERRGGGGGGGERRGGGGGGRDRR	1852
rpsC_lf.cluster1103	1	Ga0577619_01178938_339_1163	Ga0577619_01178938	1	LGHKVNPIGLRTGIIRTWQSRWYSDKDYTRLLAEDIKLRQVLKQRLRNASVSQIEIERSGGNQVSVTIHTAKPGIVIGKSGSAVEALRQDLKKLVGRDVRLNIVEIGRPELDAELVARNIAESLQKRIAFRRAVKQAIQRTMRFGAKGIKVIVAGRLGGAEMARREREVYGKVPLHTLRADIDYGTAEAATTYGRIGVKVWIYKGDIIGKQKIRVRPPEERVVPVGEEGVEYEEPAYEPYYAEEEYVEPGEEAEPEIDESLFADLVGDEEEEDQ	1203
rpsC_lf.cluster1104	1	Ga0480590_0067936_159_980	Ga0480590_0067936	1	MGQKTNPIGNRLGIIRGWESNWYASRKDFSSRLIEDTRIRTYLTARINKGGISKIVIERTLGKLIITIHTSKPGIIIGKGGGEVDRIKEELKKLTGKDDVQINILEIRRPELDAMIVADTIAKQIENRINFKRAIKMAIASALRMGAEGIKVKASGRLGGAEIARSEEIKQGRTPLHTLRMDIDYANVFALTVYGKIGIKVWICKGEILTKRDLNPNFVSGKNEGPGGERRPDRRDERPDRRDDRRGGGDRRQPGGGGGDRRGGGPGAGGRRN	1556
rpsC_lf.cluster1105	1	Ga0577616_0372275_478_1296	Ga0577616_0372275	1	MGQKVHPIGFRLGVKVGERSVKDWDGRWFATGKEYSDLLLEDVRVRQHILTRMADAGVAKVEIERSANMITVTIHAAKPGIVIGKSGVKVEELRRTLEAMTGKRIRVTIQEIRQPEINAMLVAHSIADQLEKRVAFRRAMKQAVQRAQRFGAKGVRVQVSGRLGGSEMSRREWDRWGRVPLHTLRADIDYGQTEAHTTYGIIGVKVWVYRGDFTPDGRSPEEVAAEQRQPDRRGPRATVRAEVAPEAAAEAAAPAVPAEIDYSRGGVFEPGED	1298
rpsC_lf.cluster1106	9	Ga0577619_00129093_2679_3500	Ga0577619_00129093	1	MRVGYIHDWKSNWFNERHFADYLEEDLKVRDHIINKLAHAGLSDITIRKNANELEVNIMTARPGIVIGKSGSEVDALRKDLHRMTRKQIKVNILEIKRPELDAKLVAQSIAEQLQNRVAFRRAMKRALTSAMRSGAKGVKVQVSGRLGGAEMARTEMYSDGRVPLHTLRADIDYGFHEARTTFGRIGVKCWINKGEIMPEGYTGADLTDMNAAPPQSDRDGGRDGRDGRDGRGGRNRGRGGGGPGGPGGPGRRGAPGRGGQGGRGGGPRGGSR	3991
rpsC_lf.cluster1107	1	Ga0577638_0996568_1_822	Ga0577638_0996568	1	DRPGNKLRITIHTSRPGIIIGRKGAEIEKLKGDLAKKTKREVFIDIQEVHKPELDAQLVSESIALQLEKRVAFRRAMRKAVDSALRFGCKGIKVRVSGRLNGAEIARTEWYLQGQLPLHTLRADIDYGFTEANTTYGVIGIKCWVYKGEILPGGLRTKGLRNEPEPRRAPRPDRRERDRDRAPRQTAPVEHGAVQAAPGEMAPRTTAPILPPMAAPTAPSWKQDVAPAASPEVTPPVTPDVRPDVKPDVKPDVKPEGGENPVEDRKDGEEGKE	1192
rpsC_lf.cluster1108	1	Ga0577625_0310696_2_823	Ga0577625_0310696	1	WKSRWFADKLYKDYIGEDVKIRRMMSKGLERAGISKVDIERTRDRVRVDIHTARPGIVIGRKGAEADRIRGELEKLTGKQVQLNILEVKSPESDAQLVAQGVAEQLSSRVSFRRAMRKSMQSAMKNSIVKGIRVQVSGRLGGAEMSRTEFYREGRVPLHTLRANIDYGFFEARTTFGRIGVKVWIYKGDFVPGREAPAETGPARPRRDRADRPERPRRGRSGSSGTTAGGTEAGRAAAAEMTGGAPAEAAAPAEPTNSSAAPATAAPAEQQEG	1633
rpsC_lf.cluster1109	3	Ga0577625_0001533_20843_21664	Ga0577625_0001533	1	MGQKINPIGFRLAVNRNWASRWYANNKNFPGMLLEDIRVREHLKKKLAHAAVSRVVIERPAKNARITIFSARPGVVIGKKGEDIESLKVELQKMLGVPVHVNIEEVRKPETDAQLIADSIAQQLQKRIMFRRAMKRAIANAMRLGAQGIKIASSGRLNGIEIARYEWYREGRVPLHTLRADIDYGVSSAMTSYGVIGIKVWVFKGEILQKHEQPAAAVAAALAGRAAPEAPAATPAPGAPDGAAPAGKAKKPRARRSPGTGKPGAKNAATRKA	25541
rpsC_lf.cluster111	2	Ga0480455_01059732_30_1088	Ga0480455_01059732	1	MGHKVNPIGFRLGVYRNWDARWYADKDYTKLLHEDIAMRRLIGSRLRNAGVARIETERSANQLTVIIQTAKPGIVIGKQGASVDALRDELERISGKKVRVTIHEIKTPELDATLVAENVASQLEKRIAFRRALKQTLMRSMRAGAKGARIQVSGRLGGAEMSRREWDRDGRVPLHTLRANIDYGQAEARTTFGRIGVQCWLYLGDFVSATGEPLPASGRERPEEAEPAEAVERTVVIPAAAAAVETAVPEPATAPSAGADGESAAEETFPETTEEPAEEEELVEGDEEIAAVVTHVPAGDEKVEKLTPKRAAARRKPTVARKPAAPSRAAKKPAKKPAKKSATAEPEPEDEE	1166
rpsC_lf.cluster1110	3	Ga0577634_0238439_1063_1884	Ga0577634_0238439	1	VGQKVNPHGFRLGITTDFKSTWYAEKKYKDYVAEDVAIRRMLQKGMERAGISKVEIQRTTDRVRVDIHTARPGIVIGRRGAEADRIRTDLEKLTTKQIQLNILEVKNPEVDAQLVAQGVAEQLSSRVSFRRAMRKAMQSATKGGAKGIRVQCSGRLGGAEMSRSEFYREGRVPLHTLRADIDYGFYEARTTFGRIGVKVWIYKGDAAPTRAGREAQQAALRAAQQRTGSGGGGRERPQARRPRRGDRPDNRSDRPERNSAPAAEPPAESSGEG	2305
rpsC_lf.cluster1111	1	Ga0480455_00745943_3_821	Ga0480455_00745943	1	LGHKVHPNAFRLGVFRPWEANWFANPKDYTKMLHEDLEMRRVILARLRNAGIAKIETERSSNAQLTVTIHTAKPGIVIGKGGSSVDQLREDLEKRFGNRVRISIQEIKQPELDAQLVAENIASQIERRISYKRAMKQAILRTMRSGAKGVRIYCGGRLRGAEMARREWDREGRVPLHTLRANIDFGRATANTTFGAIGVKCWIYKDQLPPQRKLAPVAEATVPLAEVIAPQVEALEVLAQPQLEAAVVTATPSPAAPRRTRTTAAPKAEPAAE	1415
rpsC_lf.cluster1112	3	Ga0577638_0623210_2_823	Ga0577638_0623210	1	QLERAAVSRIEIERTRDRLRVDVHTARPGIVIGRRGAEADRLRTKLAEITKNPKVQLNIQEIKQPELDAALIAQGIADQLQGRVSFRRAMKRAVQTVQKAGAQGIRVQCAGRLGGSEMSRREFYREGRVPLHTLRADIDYGFREARTTFGRIGVKVWIYKGDILPYKTSAEDKISREAAMAVGETSGQARPRRVISAGGGRRRADLGEPGTTPTGPAEPATEPAAAEEPTEAAEAPPIVSVDPELERLLAEEEEIERRTRGDHHETPHFPKDA	1587
rpsC_lf.cluster1113	4	soilwarming_2_heated_10-20_052016_S43_411_10	soilwarming_2_heated_10-20_052016_S43_411	1	MGQKVNPHGFRLGITTDFKSRWYAEKKYKDYVQEDVAIRRMLQKGMERAGISKVEIERTTDRVRVDIHTARPGIVIGRRGAEADRIRGDLEKLTAKQIQLNILEVKNPEVDAQLVAQGVAEQLSSRVSFRRAMRKAMQSAIKGGAKGIRVQCAGRLGGAEMSRSEFYREGRVPLHTLRADIDYGFYEARTTFGRIGVKVWIYRGDAAPTRAGREAAQAALRAAGARRDNDRGRPAAGARRPRRDGGRPDNRSDRPERTSAPTAEPSAETTGEG	7546
rpsC_lf.cluster1114	4	Ga0577632_0062763_2409_3230	Ga0577632_0062763	1	MRVGYIHDWKSNWFNERQFAAYLQEDMKVRDHITNKLAHAGLSDITIRKNANELEVNIQTARPGIVIGKSGSEVDALRKDLHRMTRKQIKVNILEIKRPELDAKLVAQSIAEQLQNRVAFRRAMKRALTSAMRSGAKGVKVQVSGRLGGAEMARTEMYSDGRVPLHTMRADIDYGFYEARTTFGRIGVKCWINKGEIMPEGYTGADLTDMNAAPPPGAERDGRDGRDRGDRGGRGRGRGGNGPGGPGGRRGGGPGGRGGQGGRGGGPGRGGPR	3679
rpsC_lf.cluster1115	1	Ga0577630_0359884_2_817	Ga0577630_0359884	1	MGQKVHPEAMRVGYIHDWKSNWFNEKNFAEYLAEDVRVREHIVNKLAHAGLSEITIRKDSQELEVNIHTARPGIVIGKSGTEVDALRRDLHRLTQKQIKVNILEIKRPELDAKLVAQSIAEQLQNRVAFRRAMKRALTSAMRSGAKGVKVQVAGRLGGAEMARTESYSDGRVPLHTMRADIDYGFYEARTTFGRIGVKCWVNKGEIMPEGYTGADLTDMTAPAPPSSDRDGRGGGRDGRDGRGGGGRGRGGGGGGGRGPGGPGGGRGAGGPG	1274
rpsC_lf.cluster1116	3	soilwarming_3_heated_80-90_052016_S48_11031_3	soilwarming_3_heated_80-90_052016_S48_11031	1	MGQKVNPHGFRLGITTDFKSRWYAEKKYKDYVAEDVAIRRMLQKGMERAGISKVEIERTTDRVRVDIHTARPGIVIGRRGAEADRIRGDLEKLTGKQIQLNILEVKNPEVDAQLVAQGVAEQLSSRVSFRRAMRKAMQSAIKGGAKGIRVQCSGRLGGAEMSRSEFYREGRVPLHTLRADIDFGFYEARTTFGRIGVKVWIYKGDAAPTRAGREAQQAALRAAQQRTGGGGGRERPQARRPRRGDRPDNRSDRPERNSAPAAEPSAETSGEG	1510
rpsC_lf.cluster1117	1	Ga0577643_00076243_1928_2746	Ga0577643_00076243	1	MRVGYIHDWKSNWFTDRHFAEYLAEDVRIREHITRKLAHAGLSDITIRKDSGELEINIHTARPGIVIGKSGSEVDALRRELHRMTNKQIKVNILEIKRPELNAALVAQSIAEQLQNRVAFRRAMKRALTSAMRSGAKGVKVQVAGRLGGAEMARTESYSDGRVPLHTMRADIDYGFYEARTTFGRIGVKCWVNKGEIMPEGYTGSDLTDLTAPAAPTSDRDGRGGRDGRGRGRGGGQSRRRPPRSGGQSPAGPGGDSQAEDTTASGSPEVER	3883
rpsC_lf.cluster1118	2	Ga0577618_0240386_469_1287	Ga0577618_0240386	1	MGQKVHPEAMRVGYIHEWKSNWFNSRHFAEYLAEDVRIREYITEKLAHAGLSNITIRKDSGELEVNIHTARPGIVIGKAGSEVDALRRELHRMTNKQIKVNILEIKRPELDAALVAQSIAEQLQNRVAFRRAMKRALTSAMRSGAKGVKVQVAGRLGGAEMARTESYSDGRVPLHTMRADIDYGFYEARTTFGRIGVKCWVNKGEIMPEGYTGTDLTDMTAPPPPSDGRDGRDGRDGRGGRGRGGGGRGGDRGGRGSGGRGGRPRDDSGGSR	2155
rpsC_lf.cluster1119	3	Ga0577627_0187112_1_816	Ga0577627_0187112	1	VGHKVHPNAFRLGVFRPWEANWFANPKDYTKMLHEDLAMRTAILARLRNAGIAKIETERSSNAQLTVTIHTAKPGIVIGKGGSSVDQLREDLEKRFGNRVRISIQEIKQPELDAQLVAENIASQIERRISYKRAMKQAILRTMRSGAKGVRIYCGGRLRGAEMARREWDREGRVPLHTLRADIDFGRATAKTTFGAIGVKCWIYKDQITPKARLPIADGAPIGEAIAPQPEAPVDVAPQPVVEAPQPEPVVAEAPQPEPVVAEAPQPEPAVA	2520
rpsC_lf.cluster112	2	Ga0577627_0626019_70_1128	Ga0577627_0626019	1	MGQKVHPESLRVGYIHDWKSNWFNEKNFSDYLAEDVAVRDHILRKLAHAGLSDITISKKTTEIEVNINTARPGIVIGKSGSEVDALRRDLHRITGKQVKVNILEIKRPELDAKLVAQSIAEQLQNRVAFRRAMKRALTSAIRSGAKGVKVQVSGRLGGAEMARTEGYSDGRVPLHTLRADIDYGFHEARTTFGRIGVKVWINKGEIMPEGYTGADLTIMDEPAPQAPDRRDRRDGRGGGGGGRDGGRGGGGRGGGGRGGPGGRGGGQGGGPGFGGRGGGQGGGPGFGGRGGGQGGGPGGRGGGGRGPGGPGGGRGSGGSGGGRGPGGSRPGGGGGGGGRGGSGGGPRGGEGR	1306
rpsC_lf.cluster1120	1	Ga0577627_0405245_854_1672	Ga0577627_0405245	1	LSDITIRKDANEVEVNIHTARPGIVIGKSGSEVDALRKDLHRMTRKQIKVNILEIKRPELDAKLVAQSIAEQLQNRVAFRRAMKRALTSAMRSGAKGVKVQVSGRLGGAEMARTEGYSDGRVPLHTLRADIDYGFYEARTTFGRIGVKCWINKGEIMPEGYSGQDLTELEAPSPSSAAGGGRGGGPGGRGGGPGGRGGGPGGRGGGPGGRGGGPGGRGGGPGGRGGGPGGRGGGPGGRGGGPGGRGGGPGGRGGGRGGGRGGRGGGSPEVTR	1673
rpsC_lf.cluster1121	2	Ga0480585_0212224_1_819	Ga0480585_0212224	1	ARLRNAGIAKIETERSSNAQLTVTIHTAKPGIVIGKGGSSVDQLREDLEKRFGNRVRISIQEIKQPELDAQLVAENIASQIERRISYKRAMKQAILRTMRSGAKGVRIYCGGRLRGAEMARREWDREGRVPLHTLRANIDFGRATANTTFGAIGVKCWIYKDVAAPLRKQAVATDAAAPVAEIAPQPDLAAVLAEQPQVEAQVATAEPEVATPAAAPRRTRTTTTPTAKPAAKPKAEPKAKAETKAKAAPKAKAETAKAPAKKPATTKKTKS	1078
rpsC_lf.cluster1122	2	Ga0577617_0600375_4_822	Ga0577617_0600375	1	MGQKVHPESMRVGYIHDWKSNWFSDRNFAAYLAEDVGIRKHITGKLAHAGLSDITIRKDTNDLEVNIHTARPGIVIGKSGTEVDALRRDLHRMTRKQIKVNILEIKRPELDAKLVSQSIAEQLQNRVAFRRAMKRALTSAMRSGAKGVKVQVSGRLGGAEMARTESYSDGRVPLHTMRADIDYGFYEARTTFGRIGVKCWINKGEIMPEGYTGADLTDMSGPAPPSSDRGDRSEPNGGGRGRGGGGRGRGDRSGRGERGTGPGGPRQPRGGR	1134
rpsC_lf.cluster1123	1	Ga0577638_0602682_422_1240	Ga0577638_0602682	1	VGQKVNPHGFRLGITTDFKSRWYAEKKYKDYVAEDVAIRRMLQKGMERAGISKVEIERTTDRVRVDIHTARPGIVIGRRGAEADRIRGDLEKLTAKQIQLNILEVKNPEIDAQLVAQGVAEQLSSRVSFRRAMRKAMQSATKGGAKGIRVQCSGRLGGAEMSRSEFYREGRVPLHTLRADIDYGFYEARTTFGRIGVKVWIYKGDAAPTRAGREAQQAALRAAQQRAGGGGGRERPQARRPRRGDRPDTRSDRPERTSAPAAEPQAETSGES	1619
rpsC_lf.cluster1124	2	soilwarming_3_unheated_80-90_052016_S39_206_22	soilwarming_3_unheated_80-90_052016_S39_206	1	MGQKVHPYGFRLGYNKDWHSHWFAKKQYGDYLLEDLKLKAQMKGRFAGAGVSHVDVERAANRLKLIIYTSRPGIIIGRKGAEIDKLKADISARTGKEVLVSIQEIHKPELNAQLQAEKMAAQLEKRIAFRRAMRKTVEETLRFGGQGIKVRVAGRLNGAEIARTEWHLQGRLPLHTLRADIDYGFAEAHTTFGVIGVKCWIYRGEILDPKAAMARGTQPDPINEPRPERGDGRRPRRDREDGGGDRPRGDRGRGPGGPGGGRGRGPGGGGRR	21976
rpsC_lf.cluster1125	3	Ga0577641_0452036_2_817	Ga0577641_0452036	1	MGQKVHPEGLRVGYIHDWKSNWFNEKNFSDYLHEDTLIRRHIVGRLSHAGLSNITIRKNATEVEVNINTARPGIVIGKSGSEVDQLRRDLHRITGKQVKVNILEIKRPELDANLVAQSIAEQLQNRVAFRRAMKRALTSAMRSGAKGVKVQVSGRLGGAEMARTEGYSDGRVPLHTLRADIDYGFHEARTTFGRIGVKCWINKGEIMPEGYTGADLTIMDEPAPQAPERGGRDGRGGRDNRGGGPGGRGGGQGGRGGGPGGRGGGPGGQGGR	1308
rpsC_lf.cluster1126	4	Ga0577625_0074368_382_1200	Ga0577625_0074368	1	MGQKIHPTGFRLAVSRNWASRWYANNTNFASMLQEDIGVREYLKKKLKNASVGRVVIERPAKNARITIYSSRPGVVIGKKGEDIELLKTELQRRMGVPVHVNIEEIRKPETDAQLIADSITQQLERRIMFRRAMKRAMQNAMRLGAQGIKIMSAGRLNGIEIARTEWYREGRVPLHTLRADIDYATSEAKTTYGIIGVKVWVYKGDTLGRNDAPVVEEVAEDKRPRRNARPGGDRRPRRDGEGGGPANAGARRGAGAPRRAGGAGGDGKTGE	3417
rpsC_lf.cluster1127	1	Ga0577633_0000119_43512_44327	Ga0577633_0000119	1	VGQKVNPHGFRLGITTDFKSRWYAEKKYKDYVAEDVAIRRMLQRGMERAGISKVEIERTTDRVRVDIHTARPGIVIGRRGAEADRIRGDLEKLTAKQIQLNILEVKNPEVDAQLVAQGVAEQLSSRVSFRRAMRKAMQSATKGGAKGIRVQCSGRLGGAEMSRSEFYREGRVPLHTLRADIDYGFYEARTTFGRIGVKVWIYRGDAAPTRAGREAAAAALRAAGQRRDRDGGRPSQGQRRPRRERPEGRGDRPGRTASPAAEPQPDTSGEG	50695
rpsC_lf.cluster1128	18	Ga0577633_0321135_376_1191	Ga0577633_0321135	1	VGQKVNPHGFRLGITTDFKSRWYAEKKYKDYVAEDVAIRRMLQKGMERAGISKVEIERTTDRVRVDIHTARPGIVIGRRGAEADRIRGDLEKLTAKQIQLNILEVKNPEVDAQLVAQGVAEQLSSRVSFRRAMRKAMQSATKGGAKGIRVQCSGRLGGAEMSRSEFYREGRVPLHTLRADIDYGFYEARTTFGRIGVKVWIYKGDAAPTRAGREAQQAALRAAGARAGAGGRERPQARRPRRGDRPDNRGDRPDRTAAPAAEPQAESTGEG	1801
rpsC_lf.cluster1129	2	Ga0480452_0035653_2456_3271	Ga0480452_0035653	1	LGHKVNPIGLRTGIIRTWSSRWYSDKEYTRLLQEDIRLRQQLKQRLRNAGVSQIEIERSGGNQVSVTIHTAKPGIVIGKSGSAVEALRQDLKRQVGRDVRLNIVEIGRPELDAELVARNIAESLQKRIAFRRAVKQAIQRTMRFGAKGIKVVVAGRLGGAEMSRREREVSGKVPLHTLRADIDYGTAEAHTTYGRIGVKVWIYKGDIIGKQKIRVRPPEERLVPLGEEGVEYEEPAYEPYYEEEEYVEPGEEAEPEIDESLFAEFGEEEEE	3426
rpsC_lf.cluster113	2	Ga0577620_0000514_12358_13416	Ga0577620_0000514	1	VGHKVNPVGFRLGVYRNWDARWYADKEYTKLLHEDLAMRRLISGRLRNAGLARIETERSANQLTIVIQTAKPGIVIGKQGASVDALRDELERISGKKVRVTIHEIKTPELDAKLVAENVASQLEKRIAFRRAIKQSIMRTMRAGAKGVKIQVSGRLGGSEMSRREWDRDGRVPLHTLRANIDYGKAEARTTFGRIGVTVWIYKGDYVTATGEPVIPGMDGRGDADGDEALERGRRHAPVVEAAAPAPAPAPAAAAAVAEAEPVAAAPAVEAPEAETAEDVAEAPEAEAEADVDAGLDIPEEVTVLVDLPESDETPSATKRAPVKRRATPARKPAAAKGKAVPKPAETDEEEE	20318
rpsC_lf.cluster1130	4	Ga0577619_00013849_3019_3834	Ga0577619_00013849	1	VGQKVNPHGFRLGITTDFKSRWYADKLYKDYVAEDVAIRRMLQKGMERAGISKVEIERTRDRVRVDIHTARPGIVIGRRGAEADRIRGDLEKLTAKQVQLNILEVKNPETDAQLVAQGVAEQLSSRVSFRRAMRKAIQSAMKGGAKGIRVQCSGRLGGAEMSRSEFYREGRVPLHTLRADIDYGIYEARTTFGRIGVKVWIYRGEAAPTRAGREAAAAAQRAGQRRDRPAAPPRRGGGGGGGRRPDRPERGPGAAEAAVPAGAAPAAGAEG	10507
rpsC_lf.cluster1131	1	Ga0577640_0209045_721_1536	Ga0577640_0209045	1	MGQKVHPESMRVGYIHDWKSTWFNEREFSDYLMEDLGIRDHIENKLAHAGLSDITIRKNANEVEVNIHTARPGIVIGKSGSEVDALRRELHRMTGKAVKVNILEIKRPELDAKLVAQSIAEQLQNRVAFRRAMKRALTSAMRSGAKGVKIQVSGRLGGAEMARTEGYSDGRVPLHTLRADIDYGFFEAKTTFGRIGVKVWINKGEIMPKGFAQDLTELEAPQQVGGPGGGPRGGRGGPRGGGGPPRSGGPGGPRGGGGGPRGGQPPGRGGR	1570
rpsC_lf.cluster1132	3	Ga0480590_0036667_464_1279	Ga0480590_0036667	1	MGQKIHPTGFRLAVSRNWASRWYANNTHFAGMLQEDIGVREYLKKKLKNASVSRVVIERPAKNARITIYSSRPGVVIGKKGEDIELLKTELQRRMGVPVHVNIEEVRKPETDAQLIADSITQQLERRIMFRRAMKRAMQNAMRLGAQGIKIMSAGRLNGIEIARTEWYREGRVPLHTLRADIDYATSEAKTTYGVIGVKVWVYKGDTLGRNDAPVVEETAEEKRPRRNARPGDRRPRRDGDGGAPGARRGGPRRGGAGGAGGAGGDAKSGE	2020
rpsC_lf.cluster1133	1	Ga0577625_0150242_146_961	Ga0577625_0150242	1	MGQKTNPIGARLGIIRGWDSNWFANKTDYPKKLIEDHKIRNYLNARINKGGIAKIVIERTLNKLIITIHTSKPGIIIGKGGGEVDRIKEELKKLVSKDDVQINILEIRRPELDANIVADTIARQLENRINYKRAIKMSIASALRMGAEGIKVKVGGRLGGAEIARSEEIKQGRTPLHTLRMDIDYANVFALTVYGKIGVKVWICKGEVLGKRDLNPNVVAGGGKEGGPGERQGGFDRRDDRRGGDDRRGGGGGDRRGGGGGNRGGQGGGRR	2388
rpsC_lf.cluster1134	6	Ga0577638_0220530_821_1636	Ga0577638_0220530	1	VGQKVNPHGFRLGITTDFKSRWYAEKKYKDYVAEDVAIRRLLQKGMERAGISKVEIERTTDRVRVDIHTARPGIVIGRRGAEADRIRGDLEKLTAKQIQLNILEVKNPEVDAQLVAQGVAEQLSSRVSFRRAMRKAMQSATKGGAKGIRVQCSGRLGGAEMSRSEFYREGRVPLHTLRADIDYGFYEARTTFGRIGVKVWIYKGDAAPTRAGREAQQAALRAAGARAGAGGRERPQARRPRRGDRPDNRGDRPERTSAPSTEPQAESSGEG	2846
rpsC_lf.cluster1135	3	Ga0577625_0000021_373546_374361	Ga0577625_0000021	1	MGQKINPIGFRLALNKNWASRWYANNKNFPGMLLEDIRVREFLKKKLAHAAVSRVVIERPAKNARITVHSARPGVVIGKKGEDIESLKVELQKMLGVPVHVNIEEVRKPEIDAQLIADSISQQLQKRIMFRRAMKRAITNAMRLGAQGIKIMSAGRLNGIEIARTEWYREGRVPLHTMRAEIDYGVSEAKTSYGVIGIKVWVFKGEVMHKSEQPAAAVAAALAVTAPAPEKPAPSAAPDGKDKAKKPRAPRKPGAKPGARSGAKNAATRKA	378450
rpsC_lf.cluster1136	1	Ga0577640_0194024_814_1629	Ga0577640_0194024	1	KHITGKLSHAGLSDITIRKDANEVEVNIHTARPGIVIGKSGSEVDALRRDLHRITKKQIKVNILEIKRPELDAKLVAQSIAEQLQNRVAFRRAMKRALTSAMRSGAKGCKIQVGGRLGGSEMARTEMYSDGRVPLHTLRADIDYGFYEARTTFGRIGCKVWINKGEIMPEGYGGADLTEMEAPQQAGIGAGDRDRGGRGRNDRDGRGGRGGRGGGPGGPGGGRGPGGPGGGRGGRGGGGGGGRGPGGAGGSARGGSGGGPRGGGGGYGGGR	1630
rpsC_lf.cluster1137	2	Ga0480586_0027939_1734_2549	Ga0480586_0027939	1	MGQKVHPTGFRLGISTDWKSRWYADKLYKDYISEDVKIRKMMSKGLERAGISKVDIERTRDRVRIDIHTARPGIVIGRKGAEADRIRGNLEKLTGKQVQLNILEVKSPESDAQLVAQGVAEQLSSRVSFRRAMRKAMQSAMKNTLVRGIRVQVSGRLGGAEMSRTEFYREGRVPLHTLRANIEYGFFEARTTFGRIGVKVWIYKGDAAAGGVPEAQAPGRPRREPRGERPDRPRRLRSGASGTTAGGTEAGRAGAAELAQASEPAASPGCG	2549
rpsC_lf.cluster1138	4	Ga0480588_0072937_707_1522	Ga0480588_0072937	1	MGQKIHPEGFRVGYIHDWKSTWFEEKNFADVLQEDLQIRDHIVGKLSHAGLSNITIERRGEVAVDIHTARPGIVIGKSGSEVDALRKELHKLTGSPVKVNIREVKRPELDAKLVAQSIAEQLQNRVAFRRAMKRALTSAMRSGAKGVKVQVSGRLGGAEMARTESYSDGRVPLHTLRADIDYGFFEAKTTTGRIGVKCWINKGEVMPEGFRSDLASTDDEPQGNQRGGRDRGGRGPGGDRGPGGGRSGGGRGPGGGGRGGDRGGRGGGGGR	2194
rpsC_lf.cluster1139	2	Ga0577625_0000003_994796_995611	Ga0577625_0000003	1	MGQKIHPEGFRVGYIHDWKSNWYEDKNFADVLQEDLQIRDHIENKLSHAGLSSITIERRGEVAVDIHTARPGIVIGKSGSEVDALRKELHKLTGSPVKVNIREVKRPELDAKLVAQSIAEQLQNRVAFRRAMKRALTSAMRSGAKGVKVQVSGRLGGAEMARTEQYSDGRVPLHTLRADIDYGFFEARTTTGRIGVKCWINKGEVMPEGFRSDLVSGDGDSQSQNRGGGGRRDDRGGGGRGRGPGGDRGGRGGGGRGPGGGGRGGQRGGGR	1149343
rpsC_lf.cluster114	1	Ga0577618_0834601_2_1054	Ga0577618_0834601	1	PHAAISRVEVERTRDRVRVDVHTARPGIVIGRRGAEADRLRDGLAKITSNPKVQLNIQEIKQPELDAALISQGVADQLVGRVSFRRAMKRAVQTAQKAGAQGIRVQCSGRLGGSEMARTEWYREGRVPLHTLRADIDYGFREAKTTFGRIGVKVWIYKGDILPYRTSAEDKISREAAMAVGETSGQGRPRRIISAGGGRRRPEQGEPGAEPAVPTTPVPEDEGGEAVPIIPEVDPELERLLAEEEEIERRTRQPHETPHFRPDESRARSTSMLMPRKVKHRKQQRGRMSGVSTRGTRIVFGDYGIQALEPGWITARQIEAARIAMTRHVKRGGKVWINIFPDKPVTEKPAE	1054
rpsC_lf.cluster1140	1	Ga0577635_0515727_264_1076	Ga0577635_0515727	1	DTKWYANKQNFSTLLVEDVKIRKFVKKALYNSGVSRIELERAANRVKVTVHTAKPGMVIGKQGAGITDLQKALETMTGKTVSVNVIEIRIAELDAQLVAESIAQQLEKRIAFRRTMKQSVQKAMRMGAKGIKVLISGRIGGAEIARREGAKDGTVPLHTLRADIDYGFAEATTTYGKIGIKCWLFAGDRNAIPAGIDRGDRGDRRDRGGRGGRPGERGGSRGGAGGAGGGGRGGAGGAGGGRPQAPRAAGADRAAIAAGPTPVNREGGRS	1078
rpsC_lf.cluster1141	5	Ga0577638_0053219_4481_5293	Ga0577638_0053219	1	VGQKVNPHGFRLGITTDFKSRWYADKLYKEYVAEDVAIRRMLQRGMERAGISKVEIERTRDRVRVDIHTARPGIVIGRRGAEADRIRGDLEKLTKKQIQLNILEVRNPEVDAQLVAQGVAEQLSSRVSFRRAMRKAIQSAMKGGAKGIRVQCSGRLGGAEMSRSEFYREGRVPLHTLRADIDYGFYEARTTFGRIGVKVWIYRGEAPTSRAGREAAAAAAALRAAGQRDGRRGGRDRDRGDRGERRGGRRPDGASAPASAERGERPGAEG	5760
rpsC_lf.cluster1142	1	Ga0577632_0486233_7_819	Ga0577632_0486233	1	VRDFVQKETERAGYGGMEIQRTPLGTRVNIIAERPGMVIGRRGATINELTSKLQSQFGIENPQISVEEPNYNPGLNAQIMAIKVAESLERGWHFRRVGHSTTQRVMASGAQGVIVEIAGKLTGQRKRREKFIAGHVKYCGETALTLMDVGYAQCKKKLGIIGCTVRIMKKDAHLPDEVRIFAPGEKAAAEAASKARQAAQAAGVQTVTSDFGGAGAAGSSPQTGTPSPAPAQRPAAPAEPRTPAPSTGPAPAPGRRERKSFTVGGQGGSP	1217
rpsC_lf.cluster1143	4	Ga0577623_0072707_670_1482	Ga0577623_0072707	1	MGQKANPIGNRLGIIRGWDSNWYGSKKDYASKLIEDHKIRTYLSARINKGGIAKIVIERTLGKLIVTIHTSKPGIIIGKGGNEVDRIKEELKKLTGKEDVQINILEIRRPELDATIVGDTIARQIENRINFKRATKMAIASTLRMGAEGIKVKLSGRLGGSEIARSEEFKQGRTPLHTFRMDIDYANVFAQTVYGKIGIKVWICKGEVLGKRELNPNFVGGKNDLSDRRDRAGDERRPGGDRRDDRRGGGGGDRGGRGGDNRGGGGRGRN	3222
rpsC_lf.cluster1144	7	soilwarming_heated_10-20_052016_S40S43S46_6840_4	soilwarming_heated_10-20_052016_S40S43S46_6840	1	MGQKIHPTGFRLAVSRNWASRWYANNTNFASMLQEDIGVREYLKKKLKNASVGRVVIERPAKNARITIYSSRPGVVIGKKGEDIELLKSELQRRMGVPVHVNIEEIRKPETDAQLIADSITQQLERRIMFRRAMKRAMQNAMRLGAQGIKIMSAGRLNGIEIARTEWYREGRVPLHTLRADIDYATSEAKTTYGIIGVKVWVYKGDTLGRNDAPVVEEVAEDKRPRRNARPGGDRRPRRDGEGGGPANAGARRGAPRRAGGAGGDGKTGE	3674
rpsC_lf.cluster1145	1	Ga0577625_0535587_406_1215	Ga0577625_0535587	1	MGQKINPIGFRLAVNRNWSSKWYANSRNFAPMLAEDIKVRAFLKKKLAHASVGRVLIERPAKDARITIFSARPGVVIGKKGEEIEALKAELRRIMGVQQVHVNIEEIRKPEIDAQLIADSIAQQLEKRIMFRRAMKRAMQNAMRLGAQGIKIMSAGRLNGIEIARTEWYREGRVPLHTLRADIDYGLGEAKTSYGVIGIKVWVYKGEVLPKAEAAAAALLGAAAPAPQPEAPSEPKRAKKPFPKAGAKKGERGAPARPRPEGDRKTAAAK	1217
rpsC_lf.cluster1146	1	Ga0577624_0048053_484_1296	Ga0577624_0048053	1	MGQKVHPESMRVGYIHDWKSNWFSERNFASYLAEDVAIRRHITGKLAHAGLSDITIRKDTNDLEVNIHTARPGIVIGKSGTEVDALRRDLHRMTRKQIKVNILEIKRPELDAKLVSQSIAEQLQNRVAFRRAMKRALTSAMRSGAKGVKVQVSGRLGGAEMARTESYSDGRVPLHTMRADIDYGFYEARTTFGRIGVKCWINKGEIMPEGYTGADLTDMSGPAPPSSDRDRSDQDGGGRGRGGGRGRGERSGRGDRGGGPGGPRQPRVGR	4357
rpsC_lf.cluster1147	4	Ga0577633_0020610_5801_6610	Ga0577633_0020610	1	VGQKVNPHGFRLGITTDFKSRWYADKLYKDYVAEDVAIRRMLQRGMERAGISKVEIERTRDRVRVDIHTARPGIVIGRRGAEADRIRGDLEKLTSKQIQLNILEVKNPETDAQLVAQGVAEQLSSRVSFRRAMRKAMQTSMKGGAKGIRVQCSGRLGGAEMSRSEFYREGRVPLHTLRADIDYGFYEARTTFGRIGVKVWIYRGEAPTTRAEREAAAAALRAGQRRDRPPQQPRRRRPGDERGQGGPDDAPRAAAAAVAAPAATVGEEG	7295
rpsC_lf.cluster1148	1	Ga0577633_0579593_446_1255	Ga0577633_0579593	1	MKQTQRAGFGGLDIQRTPMGTRVTLIAERPGLVIGRKGSSIKALTDAVERQFNFDNPQIEVQEVGNAALNAQIMAAKLANALERGWHFRRAGHSTVRRIMEAGAKGCLVVIAGKLTGQRHRRAKFKDGHIKYCGEPRNLWMDLGFAVAKLKPGVIGVTVEIMDPRAKLPDEIEIKQPSAEYIAAAALYVPPVEAPAVLEPEPALVSKGTRGPEGADEELEPLIKPGEPESTTAKVKKSKVATKRLKKVAKEVKQLGVDVDVDAEGGDGA	1274
rpsC_lf.cluster1149	8	Ga0577622_0030625_970_1779	Ga0577622_0030625	1	MGQKINPHGFRLGITTDWKSRWYADKQYAEYVKEDVQIRKLLATGMERAGISKVEIERTRDRVRVDIHTARPGIVIGRRGAEADRIRAELEKLTKKQVQLNILEVKNAESDAQLVAQGVAEQLSNRVAFRRAMRKAIQSAMRSPNVKGIRVQCSGRLGGAEMSRSEFYREGRVPLHTLRADIDYGLYEAKTTFGRIGVKVWIYKGDIVGGKREVTASAAPAAGDRRERRERPSRPRRSGSAGTTATSTEAGRAATATAVADAPAEKQEG	3808
rpsC_lf.cluster115	4	Ga0577619_00376704_197_1252	Ga0577619_00376704	1	LGHKVHPNAFRLGVFRPWEANWFANPKDYTKMLHEDLQMRGAILARLRNAGIAKIETERSSNAQLTVTIHTAKPGIVIGKGGSSVDQLREDLEKRFGNRVRISIQEIKQPELNAQLVAENIASQIERRISYKRAMKQAILRTMRAGAKGVRIYCGGRLRGAEMARREWDREGRVPLHTLRADIDFGRATAKTTFGAIGVKCWIYKDQISPKARLPITDGAPIGDAIAPQPEAPVDVAPQPVAVVETVPAEVVTAPVIAEVAAPEAAPKRARTTAPTAKPKAEAAIAAKPAAKTPATPAAKTPATPASKTPATPAVKAAPKATAPKATAPKAEKAPAAKKAPAKKATEKKAK	2323
rpsC_lf.cluster1150	3	Ga0577617_0394935_636_1442	Ga0577617_0394935	1	MAGDKAVQRKDRRIVIENVRRMLLQEYLMKQTRRAGFGGLDIQRTPMGTRVTLIAERPGLVIGRKGGAIKALTEAVERQFNFDNPQIEVQEVSNPSLNAQIMAAKLANALERGWHFRRAGHSTVRRIMEGGAKGCLVVIAGKLTGQRHRRAKFKAGHIKYCGEPRNTWMRKGFAIAKLKPGVIGVTVQIMDPDAKLPDEIVITPRTPESIAAAEAARVEAAAAAQRALAETPPAEPGIVAPEGGEDASIDLIPIEEKPLEEVKTSKVAT	1442
rpsC_lf.cluster1151	2	Ga0577619_00120164_44_853	Ga0577619_00120164	1	VGQKVNPHGFRLGITTDFKSRWYADKLYKDYVAEDVAIRRMLQKGMERAGISKVEIERTRDRVRVDIHTARPGIVIGRRGAEADRIRGDLEKLTAKQVQLNILEVKNPETDAQLVAQGVAEQLSSRVSFRRAMRKAIQSAMKGGAKGIRVQCSGRLGGAEMSRSEFYREGRVPLHTLRADIDYGIYEARTTFGRIGVKVWIYRGEAAPTRAGREKAAAEQRAGQRRERPAAPARRGGGGGRRPDRPERGPAAESAAPVPAGATPRGAEG	4128
rpsC_lf.cluster1152	1	Ga0577631_0243427_470_1279	Ga0577631_0243427	1	VGQKINPHGFRLGITTDWKSRWYADKQYAEYVKEDVEIRKMLSKGMERAGISKVEIERTRDRVRVDIHTARPGIVIGRRGAEADRIRGQLEKLTKKQVQLNILEVKNAESDAQLVAQGVAEQLSNRVAFRRAMRKAIQSAMRSPNVKGIRVQCSGRLGGAEMSRSEFYREGRVPLHTLRADIDYGLYEAKTTFGRIGVKVWIYKGDIVGGKREVTASAAPAAGDRRERRERPSRPRRSGSAGTTATSTEAGRAATATAVADAPAEKQEG	1427
rpsC_lf.cluster1153	1	Ga0480585_0218231_257_1063	Ga0480585_0218231	1	MGQKVHPHGFRLGISTDWRSTWYADKLYKDYIAEDVKIRRMMSKGLERAGIAKVDIERTRDRVRVDIHTARPGIVIGRKGAEADRIRSDLEKLTGKQVQLNIHEVKSPESDAQLVAQGVAEQLSSRVSFRRAMRKAMQSAMKNPIVRGIRVQVSGRLGGAEMSRTEFYLEGRVPLHTLRANIEVGFFEARTTFGRIGVKVWIYKGDAVPGREAPAEAAPRGRRERPDRPERPRRGRSGASGSLAGTTDAGRAAPTGPSAGESTPPAPAE	1063
rpsC_lf.cluster1154	1	Ga0577630_0480135_4_813	Ga0577630_0480135	1	MGQKIHPKATRLGYIQDWESRWLSLRDMPALIGEDYRIRTLVKERFRLAAVSWVGIERTGSYLRINIHTARPGVVIGKRGADIESVRGAIEKITSSKTFINVMEIKEPELDARLVAEAIALQLEKRIAHRRAIKRAMERTMQAGALGIKVQVGGRLGGSEIARREWMREGRVPLHTFSADIDYGFAEAHTTMGLIGVKCWIFKKQHFIKSPKEMLLTAKKDESKLVQSIAIEKAKTPAAPVAAAAPAVMPDLPMSALEQLEGKPAPEGN	1097
rpsC_lf.cluster1155	2	Ga0577632_0116568_1495_2301	Ga0577632_0116568	1	MGQKIHPTGFRLAVSRNWASRWYANNNNFAAMLQEDIGVREYLKKKLKNASVGRVIIERPAKNARITIYSSRPGVVIGKKGEDIELLKSELQRRMGVPVHVNIEEIRKPETDAQLIADSITQQLERRIMFRRAMKRAMQNAMRLGAQGIKIMSAGRLNGIEIARTEWYREGRVPLHTLRADIDYATSEAKTTYGIIGVKVWVYKGDTLGRNDAPVVEEAAEEKRPRRNARPGGDRRPRRDGEGGGPAGARRGAPRRAGGAGGDGKTGE	2698
rpsC_lf.cluster1156	2	soilwarming_heated_45-60_052018_S19S24S29_51689_3	soilwarming_heated_45-60_052018_S19S24S29_51689	1	YLKKRLAHASVGKVVIERPAKDARITIHSARPGVVIGKKGEDIEMLKADLRKLLGVQMVHVNIEEIRKPEVDAQLISDSIAQQLEKRIMFRRAMKRAMQNAMRLGAQGIKIMSAGRLNGIEIARTEWYREGRVPLHTLRADIDYGFSEAKTTYGVIGIKCWVYKGEVMAKGDQPVAPPAPTADEVLAAKKVKKAPPRPAPIVAEEKPEPVAAAKAASDAVSSAAPQAKPRAARPQPAAKKAGDAKAKAEAKSEAKPKTAVKKSRKPKA	1402
rpsC_lf.cluster1157	1	Ga0577625_0426857_575_1378	Ga0577625_0426857	1	MGQKVHPFGFRLGVTKTWRSRWFAKHDYAKLLFEDIELKKSLMERLKQAGVSSIEVDRPGNKLRITIRTSRPGIIIGRKGAEIEKLKGELAKKTQREVFIDIQEVHKPELDAQLVAESIALQLEKRVAFRRAMRKAVDSAQRFGCKGIKVRVSGRLNGAEIARTEWYLHGQLPLHTLRADIDYGFAEAHTTYGVIGVKTWVYKGEILEHPGKRSLRNDPEPRPRTPRRDGPPRDGGRDGGRRDDRRPDSRPPVVREQIVPQASNESGA	1378
rpsC_lf.cluster1158	1	Ga0577633_0091414_2743_3549	Ga0577633_0091414	1	QYKDYVKEDVAIRRLLATGLERAGIADVEIERTRDRVRVDIHTARPGIVIGRRGTEADRIRADLEKLTGKQVQLNILEVKNPESQAQLVAQGVAEQLSNRVAFRRAMRKAIQSAMRQPNVKGIRVQCSGRLGGAEMSRSEFYREGRVPLHTLRADIDYGLYEAKTTFGRIGVKVWIYKGDIVGGKRELTAAVPAGAERPRRERPSGTRPRRSGASGTTATSTEAGRAASGADEAPGADRGYRRGRCRGADHGEHGELNHVDSPQGQAP	3550
rpsC_lf.cluster1159	1	Ga0577622_0437653_1_804	Ga0577622_0437653	1	MEARAEARYVRGSAQKARLVIDLIRGQQAGKAITILQATNKRFAPTIEKVLRSAIANAENKSNDVDVDQLIVTEAYVNEGPRAKRVRPAPMGRAYRYQRRMSHIVVTVGQKTVGKKSVGQKMGQKVHPYGFRLGVTKTWRSRWFAKQDYAKLLMEDIELKASLGARLKSAGVSSIEVDRPGNKLRITIRTSRPGIVIGRKGAEIEKLKQDLAKKTKREVFIDIQEVHKPELDAQLVSESIALQLEKRVAFRRAMRKAVDSALRFGCKG	1080
rpsC_lf.cluster116	2	Ga0577615_0000127_48827_49882	Ga0577615_0000127	1	MGQKVHPGGMRVGVIHDWKSNWYTGKKEFPGYLIEDLKIREHITNKLSHAGLSDILIRKDKQRVTVDIYTARPGIVIGKSGVEVDALRKELHAITKKNVHININEIKRPELDAKLVAQSIAEQLQNRVSFRRAMKRALASGVRSGAKGVRIQCGGRLGGTEMSRSEAYSEGRVPLHTIRADIDYGFVEAKTTFGRIGVKVWINKGEIMPEGYGGLDTEKDVRLGEQDQARRRRANVEGLGASREGGRDRQRDREGLGPVRPGRKRSGGQGRGGGQGRGQGRGGRPAPRNRAGQQENVERTGTDQTARPAEATQPPVEPPVDSTPAPVVDAPDTAAPKQQADEPAKQEGTDS	53949
rpsC_lf.cluster1160	2	Ga0577622_0024840_3122_3928	Ga0577622_0024840	1	MGQKVNPIGIRLGITRDWTSRWYAGRKQFPEHVHTDFRVREFLKEKLKEASVSRILIERAAKKVNITIQTARPGIVIGKKGEDIEKLRQETAQLLGMTINDVRLNIAEIRKPELDSQLVADSIAQQIEKRVMFRRAMKRAVMSTMRSGALGVKVRASGRLNGSEIARTEWYREGRIPLHTFRADIDYGLSEAQTTYGVIGVKVWIFKGEVFDKSELAQAADEAAAGAAPAAVPAAPAAAAAAPPAAAPPAAAATSAATAAAGDAAVQA	4163
rpsC_lf.cluster1161	1	Ga0577625_0132617_51_857	Ga0577625_0132617	1	MGQKTNPIGARLGIIRGWESNWYGNKRDFSTKLIEDNRIRTYLNARINKGGISKIVIERTLNKLIVTIHTSKPGIIIGKGGGEVDRIKEELKKLTGKDDVQINILEIRRPELDAMIVGDTIARQIENRINYKRAIKMAIASSLRMGAEGIKIKISGRLGGSEIARTEELKQGRTPLHTLRMDIDYANVFALTVYGKIGIKVWICKGEVLGKRDLNPNMVGGKAEGGESRGPRRDENRPDRRDERRGGDRRDDRRGGGGGGQRREGGRR	2545
rpsC_lf.cluster1162	1	Ga0577639_0128621_47_853	Ga0577639_0128621	1	MGQKIHPTGFRLAVSRNWASRWYANNNNFAAMLQEDIGVREYLKKKLKNASVGRVVIERPAKNARITIYSSRPGVVIGKKGEDIELLKSELQRRMGVPVHVNIEEIRKPETDAQLIADSITQQLERRIMFRRAMKRAMQNAMRLGAQGIKIMSAGRLNGIEIARTEWYREGRVPLHTLRADIDYATSEAKTTYGIIGVKVWVYKGDTLGRNDSPVVEEVAEEKRPRRNARPGGDRRPRRDGEGGGPAGARRGAPRRAGGAGGDGKTGE	2277
rpsC_lf.cluster1163	4	soilwarming_1_unheated_10-20_052016_S31_869_3	soilwarming_1_unheated_10-20_052016_S31_869	1	MGQKVNPHGFRLGITTDFKSRWYADKLYKEYVAEDVAIRRMLQRGMERAGISKVEIERTRDRVRVDIHTARPGIVIGRRGAEADRIRGDLEKMTSKQIQLNILEVKNPEIDAQLVAQGVAEQLSSRVSFRRAMRKAIQSAMKSPGCKGIRVQCSGRLGGAEMSRSEFYREGRVPLHTLRADIDYGFYEARTTFGRIGVKVWIYKGEAPTSRAGREAQAAALRAAAQQRTQRPRDGQGQGQGPRGRGGRRGAEAAPANAGASAGAGEEG	2530
rpsC_lf.cluster1164	1	Ga0577620_0190274_452_1255	Ga0577620_0190274	1	MGQKIHPEGFRVGYIHDWKSTWFEEKNFADVLQEDLQIRDHIVAKLSHAGLSNITIERRGEVAVDIHTARPGIVIGKSGSEVDALRKELHKLTGSPVKVNIREVKRPELDAKLVAQSIAEQLQNRVAFRRAMKRALTSAMRSGAKGVKVQVSGRLGGAEMARTESYSDGRVPLHTLRADIDYGFFEARTTTGRIGVKCWINKGEVMPEGFRSDLASADDEPQGQRGSRPGGRPGGDRGPGGGRSGGGRGPGGGRGGDRGGQRGGGGR	1428
rpsC_lf.cluster1165	2	Ga0577633_0283374_1052_1855	Ga0577633_0283374	1	MGQKVNPIGLRLGVNRTWDSRWYANTGEYGRLLHEDIKIRKVLRERLAGAGISRIVIERPHKKCRVTIYTAKPGVVIGKKGGDIEKLRKDLAEMVNGAEVFLNLVEVRKPETDATLVAEGVAQQLERRVAFRRAMKRAMQSTMRLGGQGIRINVSGRLGGAEIARMEWYKEGSVPLHTLRADIDYGFAEAHTAYGRIGVKVWIYKGEILEHDPMAQDKRLAESGEQRERRDRDRPPQRADRDDRSRDDRPRGGRGRRREPDATETKV	1934
rpsC_lf.cluster1166	1	soilwarming_3_heated_0-10_052018_S26_120_11	soilwarming_3_heated_0-10_052018_S26_120	1	MGQKIHPEGFRVGYIHDWKSTWFEEKNFADVLQEDLQIRDHIVNKLSHAGLSNITIERRGEVAVDIHTARPGIVIGKSGSEVDALRKELHKLTGSPVKVNIREVKRPELDAKLVAQSIAEQLQNRVAFRRAMKRALTSAMRSGAKGVKVQVSGRLGGAEMARTESYSDGRVPLHTLRADIDYGFFEARTTTGRIGVKCWINKGEVMPEGFRSDLASTDDEPQGQSGRGRGGGRPGGDRGPGGGRSAGGRGPGGGRGGDRGGRGGGGR	7064
rpsC_lf.cluster1167	1	Ga0577625_0760000_202_999	Ga0577625_0760000	1	MGQKVHPGGLRVGVIHDWKSNWWVGKKEFPQYLIEDIRIRQHIYKKLSHAGLSDILIRKDKQRITVDIYTARPGIVIGKSGVEVDALRKEIHAMTQKNVHININEIKRPELDAKLVAQSIAEQLQNRVSFRRAMKRSLASAIRSGAAGVKVQCSGRLGGSEMSRSEQYSEGRVPLHTIRADIDYGFTEARTPTGRIGVKVWINKGEIMPEGYGGVPGGGKETRLGDQDAARRRGGVTEGLGASREGGRGRQQDRTDLGPVRRGRPG	1001
rpsC_lf.cluster1168	1	Ga0480585_0242515_2_802	Ga0480585_0242515	1	KLAHAGLSDITIRKDANEVEVNIHTARPGIVIGKSGSEVDALRRDLHRITKKQIKVNILEIKRPELDAKLVAQSIAEQLQNRVAFRRAMKRALTSAMRSGAKGCKIQVGGRLGGSEMARTEMYSDGRVPLHTLRADIDYGFYEARTTFGRIGCKVWINKGEIMPEGYGGADLTEMEAPQQAGIGAGDRDRGGRGRNDRDGRGGRGGRGGGPGGPGGGRGPGGPGGGRGGRGGGGGGGRGPGGAGGGSRGGSGGGPRGGGGGYGGGR	1007
rpsC_lf.cluster1169	2	Ga0577630_0529987_3_803	Ga0577630_0529987	1	LAEDLKVREFLKARLKSAAVSRILIERPAKNARITIFSARPGVVIGKKGEDIENLKAELTRRLGVPVAVNIEEVRKPEIDAQLIADSITQQLEKRIMFRRAMKRAMQNAMRLGAQGIKIMSSGRLNGIEIARCEWYREGRVPLHTLKADIDYGFSEAKTTYGVIGVKCWVYRGDRLAAGEAPGVQAPAQEEERRPRRPARPGDRPGGDRRGPPPGRGDRAPRQAGAPVDGTDKPAEAGGAEAPKTPTVKRVRKAVPPAGTGGAKGE	1041
rpsC_lf.cluster117	2	Ga0577630_0007836_6156_7211	Ga0577630_0007836	1	MGQKIHPGGLRVGIIHEWKSAWFSERDFGAYLAEDIRIREHILGKLSHAGLSDIYIRKDNQRITIDIYTARPGIVIGKSGSEVDALRRDVHAMTSKAVQININEIKRPELDAKLVAQAVGEQLQNRVSFRRAMKRSLASAIRSGAQGAKIQCGGRLGGSEMSRSEQYSEGRVPLHTLRADIDYGFYQAKTTFGVIGVKVWINKGEIMPEGYEGHAGQTTRLGEVDAKRRRGGAKVTEDLGPTRPGRRGPGGGGGGGGGGNRGRGGQGGGGGGGGGGFGGGGGNRGGQGGGNRGGGGGGFAGGQGGQGGGGQSAPTGRRPRPAAQPRPSDTAPPTPDAPANDAPATGGEGEA	7774
rpsC_lf.cluster1170	3	Ga0577627_0012002_6188_6988	Ga0577627_0012002	1	MGQKIHPEGFRVGYIHDWKSNWFEEKNFADVLQEDLQIRDHIVNKLSHAGLSDITIERRGEVAVDIHTARPGIVIGKSGSEVDALRKELHKLTGSPVKVNIREVKRPELDAKLVAQSIAEQLQNRVAFRRAMKRALTSAMRSGAKGVKVQVSGRLGGAEMARTESYSDGRVPLHTLRADIDYGFFEARTTTGRIGVKCWINKGEVMPEGFRSDLISNDEPPSGGGGRGRDGGGRGRDGGGRGRDGGGRGRDGGPGGGGGGRRGGGR	8392
rpsC_lf.cluster1171	1	Ga0577635_0344966_527_1327	Ga0577635_0344966	1	REYKDYLTEDWKIRRALMTKLESAAVSRIEIERTRDKVRVDIHTARPGIVIGRRGAQADELRALLTEITGNPKVQLNIVEIKSPELDAALIAQGVADQLVNRIAFRRAMKRAVQNAQKAGALGIRVQCSGRLGGAEMSRTEWYREGRVPLHTLRADIDFGVREARTSSGRVGVKVWIYKGDIVPYKSINDDKITREAAMAAGDPSGAGQPRRVVSSAGRRPAEGDVEATPLVKEADPELEKLLDEEEEIARRTHGGSEAPHFRGED	1328
rpsC_lf.cluster1172	3	Ga0577639_0310097_681_1481	Ga0577639_0310097	1	LGQKVHPESIRVGYIHDWKSNWFNEKNFADYLHEDTQIRRHIIGRLSHAGLSDITIRKNANEVEVNIHTARPGIVIGKSGSEVDQLRRDLHRITQKQVKVNILEIKRPELDARLVAQSIAEQLQNRVAFRRAMKRALTSAMRSGAKGVKVQVSGRLGGAEMARTEGYSDGRVPLHTLRADIDYGFHEARTTFGRIGVKCWINKGEIMPEGYTGADLTIMDEAPPQPPDRGGRDGRDGRGRGGRDRDGRGRGGGRRGADPNPGGISR	1513
rpsC_lf.cluster1173	8	Ga0577619_00009635_9336_10136	Ga0577619_00009635	1	MGQKINPYGFRLGITTDWKAKWFAPKDTYKKYLHEDIGIRDYIRKELPHGMISRVDIERTRDRVRVDIHTARPGIVIGRRGAEVEHLKQQIQKMTGANEVRVDALEVKQPQTEAPLLAQAIAEQIAGRVSFRRAMRRSVQEAMRAGARGIKVQCSGRLGGAEMSRTETYREGRVPLTTLRADVDYGFYESRTKYGRIGCKVWIYKGEILPTREEERIRKAAQERVRRRARRRTPSEEASEGAPAAAEPAAPAAPATEAAPADGTES	12179
rpsC_lf.cluster1174	1	Ga0577630_0001232_6632_7429	Ga0577630_0001232	1	MGQKIHPGGFRVGYIQDWKSNWFEEKDFADVLNEDLKIREHIENKLAHAGLSNITIERHGEIAVDIHTARPGIVIGKSGSEVDALRKDLHKLTGKPVKVNIREVKRPELDAKLVAQSIAEQLQNRVAFRRAMKRALTSAMRSGAQGCKVQVSGRLGGAEMARTEGYSDGRVPLHTLRANIDYGFFEARTTTGRIGVKCWINKGEVMPEGFRTNQLEEEDGGPQGQRGGRPGGDRGGRGGDRGGRGGGGRGGPGGGRGGQQRGGGR	19047
rpsC_lf.cluster1175	2	Ga0577631_0130722_760_1557	Ga0577631_0130722	1	MGQKIHPEGFRVGYIHDWKSNWFEEKNFADVLQEDLQIRDHIVKKLSHAGLSDITIERRGEVAVDIHTARPGIVIGKSGSEVDALRKELHKLTGSPVKVNIREVKRPELDAKLVAQSIAEQLQNRVAFRRAMKRALTSAMRSGAKGVKVQVSGRLGGAEMARTESYSDGRVPLHTLRADIDYGFFEARTTTGRIGVKCWINKGEVMPEGFRSDLISNDEPPSGGGGRGRDGGGRGRDGGGRGRDGGGRGRDGGPGGGGGRRGGGR	1951
rpsC_lf.cluster1176	1	Ga0577642_0169342_2_796	Ga0577642_0169342	1	MGQKVHPGGLRVGVIHDWKSNWMVGKKEFAGALLEDIKIREHILGKLAHAGLSDILIRKDKQRITVDIYTARPGIVIGKSGVEVDALRKEIHAMTQKNVHININEIKRPELDAKLVAQSIAEQLQNRVSFRRAMKRSLASAIRSGAAGVKVQCSGRLGGAEMSRSEQYSEGRVPLHTIRADIDYGFTEARTPTGRIGVKVWINKGEIMPAGYGGIPGGGKETRLGDQDAARRRGGVTEGLGASRESARGRSQDREGRGPVRRGKP	2160
rpsC_lf.cluster1177	2	Ga0577615_0015296_1186_1983	Ga0577615_0015296	1	LRNKELEKIVGQKVHPYGFRLGYNKDWHSHWFAKKQYGEFLLEDLRLKRDLKQRFAGAGVSHVDIERAANRLKIIIYTSRPGIIIGRKGAEIDKLKTDLSAKTGREVLVSIQEIHKPELNAQLQAEKIAAQLEKRIAFRRAMRKAVEESLRFGAQGIKVKVSGRLNGAEIARSEWHLQGRLPLHTLRADIDYGLAEAQTTFGQIGVKVWIYRGEILDAKAAMARGTGSDPINETRMGERERRPRTRREREGGGGSDGRRPRGENG	6950
rpsC_lf.cluster1178	5	Ga0480590_0172569_3_797	Ga0480590_0172569	1	MGQKVHPEAMRVGYIHDWKSNWFNDRNFADYLAEDVRIREHIVRKLAHAGLSQITIRKDSGELEVNIHTARPGIVIGKSGSEVDALRRELHRMTNKQIKVNILEIKRPELDAALVAQSIAEQLQNRVAFRRAMKRALTSAMRSGAKGVKVQVAGRLGGAEMARTESYSDGRVPLHTLRADIDYGFYEARTTFGRIGVKCWVNKGEIMPEGYTGADLTDMSAPAAPPGDRDGRGRRDGRNGRDGSRGGRSGPGERSEGRDDQRRGR	1008
rpsC_lf.cluster1179	1	soilwarming_unheated_45-60_052018_S4S9S14_95968_4	soilwarming_unheated_45-60_052018_S4S9S14_95968	1	MGHKVHPNAFRLGVFRPWEANWFANPKDYTKMLHEDLAMRTAILARLRNAGIAKIETERSSNAQLTVTIHTAKPGIVIGKGGSSVDQLREDLEKRFGNRVRISIQEIKQPELDAQLVAENIASQIERRISYKRAMKQAILRTMRAGAKGVRIYCGGRLRGAEMARREWDREGRVPLHTLRADIDFGRATAKTTFGAIGVKCWIYKDQITPKARLPITDGAPIGEAIAPQPEAPIDIAPQPVAEAIVAEPVEAQAVETPAPAVTPK	1701
rpsC_lf.cluster118	3	Ga0577635_0168267_316_1371	Ga0577635_0168267	1	MGQKVHPGGMRVGVIHDWKSNWYTGKKEFPGYLIEDIRIREHITGKLSHAGLSDILIRKDKQRITVDIYTARPGIVIGKSGVEVDALRKELHAITKKNVHININEIKRPELDAKLVAQSIAEQLQNRVSFRRAMKRALASGIRSGAKGVRIQCGGRLGGTEMSRSEAYSEGRVPLHTIRADIDYGFVEAKTTFGRIGVKVWINKGEIMPEGYGGLDTEKDVRLGEQDQARRRRANVEGLGASRESGRDRQRDREGLGPVRPSRKRGQGRGAGQGRGAGQSRGRGAPRGRAGGQDNVERPRTDETATSAEGREQPPTEPQVETTPAPVADAPDTTTPKQQTEDPTKQEKADQ	1887
rpsC_lf.cluster1180	1	Ga0480452_0067631_45_839	Ga0480452_0067631	1	MGHKVNPIGLRVGINRTWDSRWFARRGEYGKLLHEDRAIRAHILKLQRTAGISKVVIERPHKKCRVTVHTARPGVLIGKKGADIEKLRGELARYTSSEVHLNLLEVRKPDTDATLVAENIAQQLERRVAFRRAMKRAVQTALRAGAVGIRINVAGRLGGAEIARTEWYREGRVPLHTLRADIDFGYGLAKTAYGVIGIKVWIFKGEIMEHDPMASERRATEGAGDGQQRPRRDDGERRERRGPRTQRGGGGGSDPGAAESQGQA	2505
rpsC_lf.cluster1181	1	Ga0577639_0217894_2_793	Ga0577639_0217894	1	MGQKIHPTGFRLAVTRNWNSRWYANNRDFGDMLAEDIKVREYLKTKLKNAAVSRVLIERPAKNARITIYSARPGVVIGKKGEDIENLKRELATRLGVPVAVNIEEVRKPEVDAQLIADSITQQLEKRIMFRRAMKRAMQNAMRLGAQGIKIMSAGRLNGIEIARTEWYREGRVPLHTLRADIDYGFSEAKTTYGVIGVKVWVYKGDTLGQRDAPSLDSTPRPEGEERRGPRGPRRDGDRRPSGPGRGGPRGPGGGGGGGGGRTM	1790
rpsC_lf.cluster1182	14	Ga0577627_0323764_1_795	Ga0577627_0323764	1	LAGARDGPRDPDSKEVKPYSRGVGGCKKEVTDPRRRFAEGEYALGQKVHPIGFRLGIIKTWDSKWYEEKNYAQWLYEDIKIREFVKKSLGHAGVSKVEIERAANKVKINVHTARPGIVIGKRGAGIETIKKDLQQFTKNEVFLNIIEVRKAETDAQLVSENIATQLERRIAFRRAMKKAIQTAMKFGAKGIRVACSGRLGGAEMARYEWYREGRVPLHTLRADIDYGFAVAKTTYGTIGCKVWICRGEVLPGKAGQPALLPTRS	1893
rpsC_lf.cluster1183	1	Ga0577624_0706042_214_1005	Ga0577624_0706042	1	MGQKIHPIGFRLSVNKNWSSRWYSGSKNFASMLNEDLKVRAHLKRKLAHASVGKVIIERPAKDARITIHSARPGVVIGKKGEDIEMLKAELRKLLGVQMVHVNIEEIRKPEVDAQLIADSIAQQLEKRIMFRRAMKRAMQNAMRLGAQGIKIMSAGRLNGIEIARTEWYREGRVPLHTLRADIDYGFAEAKTTYGVIGIKCWVYKGEILPGGQRRGLRNEPEPRRMPPRDRDRRDRDRDRDRDRPPRPQLEPTSGVTQAAPGDM	1006
rpsC_lf.cluster1184	1	Ga0577637_0181006_2_793	Ga0577637_0181006	1	MGQKVHPGGMRVGVIHDWKSNWYTGKKEFPQYLIEDIKIREHITGKLAHAGLSDILIRKDKQRITVDIYTARPGIVIGKSGVEVDALRKDIHGMTSKAVHININEIKRPELDAKLVAQSIAEQLENRVSFRRAMKRSLASAIRSGAQGVKVQCGGRLGGGEMSRSESYSEGRVPLHTIRADIDYGFAEAKTTTGRIGVKVWINKGEIMPSGYESAAQQGDTRLGDQDQARRRGGRTEGLGESRQGGRGRGADREGLGPVRQRRP	1398
rpsC_lf.cluster1185	2	Ga0577616_0004551_2228_3019	Ga0577616_0004551	1	MGQKVNPLGIRLGITRDWVSKWYATKKQFPLLVRTDFLVREFLKRKLVEASVSRVLIERAAKKVSITIQTARPGIVIGKKGEDIDKLRAETARLLNMPMADVRLNIAEIRKPELDAQLVAEGIAQQIEKRVMFRRAMKRAVMSTMRSGALGMKVRMSGRLNGAEIARTEWVREGRVPLHTFRADIDYGLAEARTTYGVIGIKCWIFKGEVFDPAELERGAQAGAEAAAAAAAAAAAAAPAAATVPTAAAAAAAAAAPAAVALL	6940
rpsC_lf.cluster1186	1	Ga0577630_0029206_2817_3608	Ga0577630_0029206	1	MGQKTHPHGFRLGFTKTWNAKWYANKKNYSVLLKEDVTIRNAIRARLRDAAISRIDIERSTNQVTVTIHTAKPGVVIGKGGAKVEELRQVLGKTTGKAVKVNIFEIRFPEVDANLIAENVAQQLERRVSFRKVLKQTVQRAMKSGAKGVRVAVAGRLGGAEMSRREWEREGRVPLHTLRADIDFGRAIAKTTFGTIGVKAWIYRGDIEPAPRAVPQGTSASATAPRPTPPMPPAPTAPNAPQVPPAAAPVAPTTSPAVAQGRA	4241
rpsC_lf.cluster1187	2	Ga0577625_0412643_2_790	Ga0577625_0412643	1	VGQKINPHGFRLGITTDWKSRWYADKQYAEYVAEDVKIRKLLSKGMERAGISKVEIERTRDRVRVDIHTARPGIVIGRRGAEADRIRGELEKLTKKQVQLNILEVKNPESDAQLVAQAVAEQLSNRVAFRRAMRKAIQSAMRSSQVKGIRVQCGGRLGGAEMSRSEHYREGRVPLHTLRADIDYGFFEARTTFGRIGVKVWIYKGEVVGGRRQHEARDNATQERAPRRERPNRARRSGATGTTATSTEAGRAAAEAAQAPSEP	1403
rpsC_lf.cluster1188	1	Ga0577634_0547032_1_792	Ga0577634_0547032	1	QLERAAVRRVEIERTRDRLRVDVYTARPGIVIGRRGAEADRLRAGLLKITGNPKIHFNIQEIKQPELDATLIAQGVADQLTGRVSFRRAMKRAVQTAMKAGAQGIRVQCSGRLGGAEMSRKEWYREGRVPLHTLRADIDYGQAEARTTFGRIGVKVWIYKGDILPYKAAAEEKIAREAAMAVGETSGQAPGRRVVSAGGGRRRQPASEPVAAEAAGTDEPVAETSALVKEADPELERLLAEEEEIERRTRQHHETPHFRGDED	1435
rpsC_lf.cluster1189	1	Ga0577618_0528812_2_793	Ga0577618_0528812	1	VGYIHDWKSNWFNERDFSDYLHEDTLIRRHIIGRLSHAGLSDITIRKNANEIEVNIHTARPGIVIGKSGSEVDQLRRDLHRITQKQVKVNILEIKRPELDARLVAQSIAEQLQNRVAFRRAMKRALTSAMRSGAKGVKVQVSGRLGGAEMARTEGYSDGRVPLHTLRADIDYGFHEAATTFGRIGVKCWINKGEIMPEGYTGADLTIMDEPAPPQPDRGGRDGRGGRDGRSGGRGGGRGGRDGRDGRGGSRRGPDPNPGGISR	1386
rpsC_lf.cluster119	1	Ga0480452_0193012_97_1152	Ga0480452_0193012	1	MGQKVRPTGFRTGIMVDWVSRWYANKQDFAELLVEDQVIRKFIKKRYGRSGISKIRIERTREKVTVFIFSARVGMIIGKKGQEVDKLTKELEDLTHRHIEIKTMEVNRPEIDPQLVAEDIAEQLEKRASFRRTMKRAMDQTMEGGARGVRVQLAGRLGGAEMARTESAMNGSIPLSTLRAKIEFGFTEASRGTSASRCGLTTETIWTPRRVPMPLMPKRVKFRKSQRGKVKGNATRGNTVTFGEWGLQALEGGWLSAEAIEAGRITATHSIRGEGRLYIRVFPHKSVTSIPAETRMGKGKGEPEFWAAVVKPGMILFEVAGLPETAARDCLARVAYKMPFRCRLVSRRPNI	1468
rpsC_lf.cluster1190	4	Ga0577625_0003951_11320_12108	Ga0577625_0003951	1	MGQKIHPTGFRLAVTRNWASRWYANNTQFAGMLKEDIGVREFLKKKLKNASVSRVIIERPAKNARITIYSSRPGVVIGKKGEDIEALKTELQRRMGVPVHVNIEEVRKPETDAQLIADSITQQLERRIMFRRAMKRAMQNAMRLGAQGIKIMSAGRLNGIEIARTEWYREGRVPLHTLRADIDYATSEAKTTYGIIGVKVWVYKGDTLGRNDAPVVEEPTEDKRPRRNARPGDRRPRRDGEGGAPGARRGGPRRGGDAKSGE	15931
rpsC_lf.cluster1191	1	Ga0506675_0031624_2384_3169	Ga0506675_0031624	1	MGQKANPIGNRLGIIRGWESNWYGSKKDYASKLIEDNKIRNYLNARINKGGIAKIVIERTLGKLIITIHTSKPGIIIGKGGNEVDRIKEELKKLTNKEDVQINILEIRRPELDATIVGDTIARQIENRINYKRAIKMAIASALRMGAEGIKVKVAGRLGGAEIARTEEIKQGRVPLHTFRMDIDYANVFALTVYGKIGIKVWICKGEILTKRDLNPNFVGGKSDVSDRRDRRDGDRDRRDRRDDRRDRDRRSGGGGGGDRRR	3170
rpsC_lf.cluster1192	1	Ga0577631_0196317_809_1594	Ga0577631_0196317	1	MGQKIHPTGFRLPVTRNWASRWYASNANFATMLAEDLKVREYLKARLKSAAVSRILIERPAKNARITIYSARPGVVIGKKGEDIENLKAELTRRLGVPVAVNIEEVRKPEIDAQLIADSITQQLEKRIMFRRAMKRAMQNAMRLGAQGIKIMSSGRLNGIEIARCEWYREGRVPLHTLKADIDYGFSEAKTTYGVIGVKCWVYRGDRLAHGEAPGAQTPMPEEDRRPRRPARPGERDGRGRPGGGGFDRGAPGRGPGGDRGV	1594
rpsC_lf.cluster1193	8	Ga0577627_0009523_4308_5096	Ga0577627_0009523	1	MGQKVHPVGYRLGFTKTWNAKWFAEAKTYRILLKEDMAIRSTIRGRLRDAAIARIDIERSTNQVTVTIQTAKPGVVIGKGGAKVEELRQALGKTTGKAVKVNIFEIRYPELDANLIAENVAQQLERRVSFRKVLKQTVSRSMKAGAKGVRVAVAGRLGGAEMSRREWEREGRVPLHTLRADIEFGRAIAKTTYGTIGVKAWVYRGDIEPAPRQVSQNAPAAAARPAAMGAPAMPGVPVAPLAPVAPVPAATVATPAGPAGAV	9202
rpsC_lf.cluster1194	1	Ga0577633_0339401_1_789	Ga0577633_0339401	1	LREDLEKRFGNRVRISIQEIKQPELDAQLVAENIASQIERRISYKRAMKQAILRTMRSGAKGVRIYCGGRLRGAEMARREWDREGRVPLHTLRADIDFGRATAKTTFGAIGVKCWIYKDQITPQRRLAAISDGAPIAEQIAPQPEAPVEISELLPATAIATPEAEAAPAESPAAATTATAPAPAPTTAPKRTRTAAAPKAEVAVEAKPVAKPKPAAAKPKPEAKPAAKAKTAAPKAEKAPAKTASAKKTTDTKKPTDKKAKS	1746
rpsC_lf.cluster1195	2	soilwarming_3_unheated_80-90_052016_S39_422_6	soilwarming_3_unheated_80-90_052016_S39_422	1	MGQKVHPYGFRLGYNKDWHSHWYAKKQFGEFLLEDLKLKRELKQKFTGAGVSHVDVERAANRLKIIIYTSRPGIIIGRKGAEIDKLKGDLSARTGREVLVSIQEIHKPELNAQLQAEKIAVQLEKRIAFRRAMRKTVEESIRFGAQGIKVKISGRLNGAEIARSEWHLQGQLPLHTLRADIDYGLAEAHTTFGVIGVKVWIYRGEILDPKAAMARGTGTDPINEPRGDGRERRPRTRREREGGGRDGERSDRPGRGRGGDRS	14093
rpsC_lf.cluster1196	1	Ga0577616_0076903_1744_2529	Ga0577616_0076903	1	MGQKVHPHGFRLGISTDWKSRWYADKLYKDYIAEDVKIRKMMSKGLERAGISKVDIERTRDRVRIDIHTARPGIVIGRKGAEADRIRGELEKLTGKQVQLNILEVKSPESDAQLVAQGVAEQLSSRVSFRRAMRKAMQSAMKNPLVKGIRVQCAGRLGGAEMSRSEFYREGRVPLHTLRANIEYGFFEARTTFGRIGVKVWIYKGDAVPGREAPAESGPARPRRERPERPDRPRRLRSGSSGTTAGGTEAGRAVSAEPAAAG	2529
rpsC_lf.cluster1197	3	Ga0480585_0073509_733_1521	Ga0480585_0073509	1	MGQKTHPHGFRLGFTKTWNAKWYANKKNYSVLLKEDVTIRSAIRARLRDAAISRIDIERSTNQVTVTIHTAKPGVVIGKGGAKVEELRQVLGKTTGKAVKVNIFEIRFPEVDANLIAENVAQQLERRVSFRKVLKQTVQRAMKSGAKGVRVAVAGRLGGAEMSRREWEREGRVPLHTLRADIDFGRAIAKTTFGTIGVKAWIYRGDIEPAPRAVPQGTQTTLSAPRPTPPMPPAPTAPNAPAAPVAPASPVSPAVPAAGGAV	1794
rpsC_lf.cluster1198	1	Ga0577630_0309420_572_1357	Ga0577630_0309420	1	VGQKVHPYGFRLGYNKDWHSHWFAKKNFGEYLIEDLKLKRDLKNRFAGAGVSHVDIERAANRLKIIIYTSRPGIIIGRKGAEIDKLKGDLSSKTGREVLVSIQEIHKPELNAQLQAEKIAAQLEKRIAFRRAMRKAVEESLRFGAQGIKVKVAGRLNGAEIARSEWHLQGQLPLHTLRADIDYGFAEAHTTFGVIGVKVWIYRGEILDPKAAMARGTGTDPINEPRGGDRGERRPRTRREREGRDGERSDRGDRRPRTDRP	1376
rpsC_lf.cluster1199	1	Ga0577619_00029281_1780_2565	Ga0577619_00029281	1	MGQKVNPLGIRLGITRDWTSRWYAGKKQFPLQVHTDFRVREFLKKKLAEASVSRIQIERAAKKVNITIQTARPGIVIGKKGEDIEKLRQETAALLGMAVIDVRLNIAEIRKPELDSQLVADSIAQQIEKRVMFRRAMKRAVMSTMRSGALGVKVRVSGRLNGSEIARTEWYREGRVPLHTFRADIDYGLSEAHTTYGVIGVKVWIFKGEVFDKSELAAQAAAEEAAPAVPAAAVAVAAAAPATAAPVAAASAPAAEPPAPA	7703
rpsC_lf.cluster12	2	Ga0577632_0024274_3136_4335	Ga0577632_0024274	1	MGQKVHPNAFRLGIYKPWQARWYADKDYTEQLLEDVNMRRLILNRLRNAGISKVETERSANQATVIIWTAKPGIVIGKGGASVDQLRDDLEKMTGKKVRVTIQEIKHPELDAMLVAQNVAAQLERRIAFRRAVKQSVLRTMRAGAKGVKIMVSGRLGGAEMSRREWDRDGRVPLHTLKADIDFGQTEARTTFGRIGVSVWVYLGDFDLTSREETFDEIPARQLLDETRAGALQVQAAPTNGAAAEAAPALGVTEASAAVPAPAAAPPEPSPAPPAPAPAAPKEAREAAARPKRAPRAAAPGPAAEADAKPKPAPRKAGSRAQRTPAAVDAEAPVTNTVAEPATPEATAPAPESAEPVAPEAATENAKTAAPKPARKPAARRPRATKTEEPGGDAAKDEA	5761
rpsC_lf.cluster120	6	Ga0577628_0049680_188_1240	Ga0577628_0049680	1	MGQKVNPYGFRLGVTTDWKSRWFSDREYTDYLIEDWHIRDYLMRQLERAAVSRVEVERTRDRLRIDVHTARPGIVIGRRGAEADRLRADLAKITNNVKVQLNIQEIKQPELDAALIAQAVCDQLAGRVSFRRAMKRAVQTAQKAGAQGIRVQCSGRLGGSEMARSEWYREGRVPLHTLRADIDYGFREARTTFGRIGVKVWIYKGDILPYKISGEDKIQREAAMAVGETSGQVRPRRVISAGGGRRKPDQGEPGAEPPPAAEGAEPAEGAEPAEGAEPAEDAVTAEGAVTVEGAVTVEGAEPTEGEEAPAAAPLVKEADPELERLLAEEEEIERRTRQHHETPHFRSGDE	2494
rpsC_lf.cluster1200	11	Ga0577621_0154074_703_1488	Ga0577621_0154074	1	VGQKVHPIGYRLGFTKTWNAKWFAESKTYRVLLKEDIAIRSTIRGRLRDAAIARIDIERSTNQVTVTIQTAKPGVVIGKGGAKVEELRQALGKATGKAVKVNIFEIRYPELDANLIAENVAQQLERRVSFRKVLKQTVSRSMKAGAKGVRVAVAGRLGGAEMSRREWEREGRVPLHTLRADIEFGRAIAKTTYGTIGVKAWVYRGDIEPAPRQVSQNAPAAAARPAAMGAPSVGGPAPVGAPAPVAAPVATPAPAGPVGTA	1854
rpsC_lf.cluster1201	1	Ga0577627_0727411_2_787	Ga0577627_0727411	1	VKIRRYITQKLTRAGISSVDIERKGDQVQVFIRTARPGIVIGRKGAEVDRIRKDIEKMTGKRVDVKVEDMNQAASEMRPETDAALLAQSVSEQLVGRVSFRRAMRRAVQTAMKAGALGVRVQCGGRLGGAEMSRREWYREGRVPLHTLRAKIDYGTAEAKTTFGVIGVKVWVYHGDEIPAQEQEIERARARALAGVPPRGTGGASTGALITDVREVEEGVPVPPAEVREARDEQARQPAQRPARRPGGGTRQPPRRTGGRS	1196
rpsC_lf.cluster1202	2	Ga0577618_0567256_542_1327	Ga0577618_0567256	1	VSKVEIERSANMITVTIHAAKPGIVIGKSGVKVEELRRTLEAMTQKRIRVTIQEIRQPEIDAFLVARSIADQLEKRVAFRRAMKQAVQRAQRFGAKGVRVQVSGRLGGSEMSRREWDRWGRVPLHTLRADIDYGQTEAHTTYGIIGVKVWIYRGDFTPDGRSPEEVAAEQRQPDRRGPRATVRAEVPEAAAPEAAPPAAPAEVDYSTGGVFDPGEESGELKPRAQRAAEPLPAPTPPTRPAPTPPPPSPPASAPPATRTEE	1331
rpsC_lf.cluster1203	2	Ga0577626_0172487_3_785	Ga0577626_0172487	1	MGQKVHPHGFRLGISTDWKSRWYADKLYKDYIAEDVKIRRMMAKGLERAGISKVDIERTRDRVRIDIHTARPGIVIGRKGAEADRIRGELEKLTGKQVQLNILEVKSPESDAQLVAQGVAEQLASRVSFRRAMRKAMQSAMKNTIVKGIRVQCSGRLGGAEMSRSEFYREGRVPLHTLRANIEYGFFEARTTFGRIGVKVWIYKGDAVPGRENQPEQSTTRPRRERSDRPERPRRLRSGSSGTTAGGTEAGRAGTAGAGAA	2713
rpsC_lf.cluster1204	1	Ga0577641_0307931_28_813	Ga0577641_0307931	1	MRAGAKGVKIMVSGRLGGAEMSRREWDRDGRVPLHTLKANIDFGQTEARTTFGRIGVSVWVYLGDFDLTTHEEPFEEIPARQLLDEPRRLPPVPTNGQAAEAAATLAAAIAEAAAPAEETPAVLAIEPTPEAAPKPKRAPRATSAKAAAPEAAEAEAVAKVAKASTTEPKPAKATARRTTGKTAAADAEPAADVETKPEAVATTKAGTRTKAGTRPEAGSSPKAKPTAEAEPKSPAKTAAKKPSASRSKKSDAGDDGKEKA	1600
rpsC_lf.cluster1205	1	Ga0577619_01233883_76_861	Ga0577619_01233883	1	MRVGYIHDWKSNWFSDRNFAAYLEEDVRIRAHITGKLAHAGLSDITIRKDTNELEVNIHTARPGIVIGKSGTEVDALRRDLHRMTRKQIKVNILEIKRPELDAKLVSQSIAEQLQNRVAFRRAMKRSLTSAMRSGAKGVKVQVSGRLGGAEMARTESYSDGRVPLHTLRADIDYGFYEARTTFGRIGVKCWINKGEIMPEGYAGADLTDMTGPAPPSPDRDRGDRDGGGRGRGGGRGRPGGDGGRRRGPGEGRGGRPGGRG	1169
rpsC_lf.cluster1206	1	Ga0577627_0131892_1_783	Ga0577627_0131892	1	MGQKVNPNGFRLGITTDWKSRWFADKQYSEYVKEDVAIRRLMSKGMERAGIAKVEIERTRDRVRVDIHTARPGIVIGRRGAEADRIRGELEKLTHKQVQLNILEVKNPEGDAQLVAQGVAEQLSNRVSFRRAMRKSMQSTLKSPGVKGIRVQCSGRLGGAEMSRSEFYREGRVPLHTLRANIDYGFYEARTTFGRIGVKVWIYKGEVPTGSRAEREAAVAAEALRQRRERPAGAARPRRSGSQGTTGVSTDAGRAASGESG	3001
rpsC_lf.cluster1207	6	Ga0577616_0546078_297_1082	Ga0577616_0546078	1	RGAAAEARPCPEVGDDAVQEENGASQGSEGVTVGQKVHPFGFRLGFNKTWRSRWYSDRDYAKLLHEDLALRQSLKKRFAHAGVAKIETERAVNRLKIDIYTSRPGIIIGRKGTEVDKLKQEIQKKTSREVFINIQEIQKPELDAQLISESVAMQLEKRVAFRRAMRKAVESALRFGARGIKVRVSGRLNGAEIARSEWYLHGQLPLQTLRADIDYGFAEANTTYGQIGIKVWLYKGERLVPQRGREEEYRERAPRRPQART	1082
rpsC_lf.cluster1208	1	Ga0577620_0086522_1345_2127	Ga0577620_0086522	1	MDAKLVAENVASQLEKRIAFRRAIKQSIMRTMRAGARGVRIQVSGRLGGSEMSRREWDRDGRVPLHTLRANIDYGQAEARTTFGRIGVTVWIYKGDFVTATGEPILPGGDGRAREDGGEGAPERPRRTPAARPEPARAAAPSVPAPEPVVAAAPAAVVAPVAPPRPAPVVEPEPEPEPEPEAAVEVEVEVDDEPDTELDVVDDLPDELADVDLSGIDIPDPDAVKGGGDIPKRAPARRKPPVTRKPGAPPKAVVPDAEEE	2142
rpsC_lf.cluster1209	1	Ga0577625_0309604_3_785	Ga0577625_0309604	1	ELHSITGKNVHININEIKRPELDAKLVAQSIAEQLQNRVSFRRAMKRSLASAMRSGAQGIKIQCGGRLGGGEMSRSERYTEGRIPLHTIRADIDYGFAEAKTTYGRIGVKVWINKGEIMPEGFEGMITGKDTRLGDQDQARRRRGGAAEGLGASRESGRGRAQDREGLGLVKKTRRPGGRPGGPAGRPGAGGQGRPRPGTGRPRRQDNVERPRTDENAQSAEGREQPVIEPQVETTPAPVADAPDTTTTETKAEDQRSED	1636
rpsC_lf.cluster121	2	Ga0577625_0060255_1130_2182	Ga0577625_0060255	1	MGQKVHPGGMRVGVIHDWKSNWYTGKKEFPGYLIEDIKIRDHITNKLSHAGLSDILIRKDKQRVTVDIYTARPGIVIGKSGVEVDALRKELHAITKKNVHININEIKRPELDAKLVAQSIAEQLQNRVSFRRAMKRALASGIRSGAKGVRIQCGGRLGGTEMSRSEAYSEGRVPLHTIRADIDYGFVEAKTTFGRIGVKVWINKGEIMPEGYGGLDTEKDVRLGEQDQARRRRANVEGLGASREGGRDRQRDREGLGPVRPGRKKSGGQGRGGQGRGQGRGRPAPRNRAGQQDNVERPRTDETATSAEGREQPPVEPTVETTPAPVADAPDSTTPKQQTDDPTKQEKADT	3798
rpsC_lf.cluster1210	1	Ga0577625_0075427_2_781	Ga0577625_0075427	1	MGQKINPNGFRLGISTDHKSRWYADKLYKSYVGEDVAIRKLLSKGMERAGIAKVEIERTRDRVRVDIHTARPGIVIGRRGAEADRIRGELEKLTGKQVQLNILEVKNPEMDAQLVAQGVAEQLSGRVQFRRAMRKAMQTTMRSGAKGIRIQCSGRLNGAEMSRTEFYREGRVPLHTLRADIDYGFYEAKTTFGRIGVKVWIYKGEVAGTRAERQAQAAARAGVPGRGGNNRPARGGAAERPSRGTRPTRSDRDGGAPEAP	3392
rpsC_lf.cluster1211	1	Ga0577636_0121922_456_1238	Ga0577636_0121922	1	MRVGYIHDWKSNWFNDRNFADYLAEDVRIREHIVRKLAHAGLSQITIRKDSGELEVNIHTARPGIVIGKSGSEVDALRRELHRMTNKQIKVNILEIKRPELDAALVAQSIAEQLQNRVAFRRAMKRALTSAMRSGAKGVKVQVAGRLGGAEMARTESYSDGRVPLHTLRADIDYGFYEARTTFGRIGVKCWVNKGEIMPEGYTGADLTDMSAPAAPPGDRDGRGRRDGRNGRDGSRGGRPGERSEGREDQRRGRPRGRRN	1642
rpsC_lf.cluster1212	3	Ga0577631_0194871_100_882	Ga0577631_0194871	1	VGQKVHPIGYRLGFTKTWNAKWFAEAKNYRILLKEDIAIRSTIRGRLRDAAIARIDIERSTNQVTVTIQTAKPGVVIGKGGAKVEELRQALGKTTGKAVKVNIFEIRYPELDANLIAENVAQQLERRVSFRKVLKQTVGRSMKAGAKGVRVAVAGRLGGAEMSRREWEREGRVPLHTLRADIEFGRAIAKTTYGTIGVKAWVYRGDIEPAPRQVSQNAPAAAARPAAMGAPSGPSAPAPVAPAAPVAPTIPAPAGPVGAA	1600
rpsC_lf.cluster1213	1	Ga0577619_01288900_1_783	Ga0577619_01288900	1	AYLLEDMKVRDHIINKLAHAGLSDITIRKNANELEVNIQTARPGIVIGKSGSEVDALRKDLHRMTKKQIKVNILEIKRPELDAKLVAQSIAEQLQNRVAFRRAMKRALTSAMRSGAKGVKVQVSGRLGGAEMARTEMYSDGRVPLHTMRADIDYGFYEARTTFGRIGVKCWINKGEIMPEGYTGADLTDMNAAPPPGADRDGRDGRDGRDRGGRGRGRGGNGPGGPGGRRGGGGPGGRGGQGGQGGQGGRGGGPGRGGPR	1138
rpsC_lf.cluster1214	1	Ga0577641_0055980_2785_3567	Ga0577641_0055980	1	ITLHTAKPGIVIGKGGTSVDQLRDELEKITGKRVRVTIQEIKKPELAAQLVAENVAAQLEKRIAFRRAIKQSLMKTMRAGAQGVKIRVKGRLGGSEMARVEWNREGRVPLHTLKADIDFGQTEAKTTFGRIGVSAWVYTGNFPTEAPPKPAVAVEEPADAVVPAGVTIGEAPSPLAELVLAAVPAATAPEAAPAAPVTAEAPAAAKPKRATRATKAATEATTTDAGEKPAPKRTPRARATTTDKADAPKAPRARAAKKKE	3567
rpsC_lf.cluster1215	1	Ga0577639_0328415_20_802	Ga0577639_0328415	1	VSRIEIERTGDRLRIDVYTARPGIVIGRRGAEAERLREGLRKISGNPKIQFNIQEIKQPEVDATLLAQGVADQLAGRVSFRRAMKRAVQTAMKAGAQGVRVQCSGRLGGAEMSRKEWYREGRVPLHTLRADVDYGLAEARTTFGRIGVKVWIYKGEILPYKSAVEDKIAREAAMAVGETAGQTAGRRVVSAGGGRRRPAAATDATAAETPVPAEGEEEAPARPLLGEADPELERLLQEEEDINRRIRQQHETPHFRGDDE	1471
rpsC_lf.cluster1216	1	Ga0577621_0447734_257_1039	Ga0577621_0447734	1	KLGHAGLSEITIRKDANEVEVNIHTARPGIVIGKGGSEVDALRRELHRLTQKQVKVNILEIKRPELDSRLVAQSVAEQLQNRVAFRRAMKRALTSAMRSGAKGVKIQVSGRLGGSEMARTEGYSDGRVPLHTMRADIDYGFVEAKTTFGRIGVKVWINKGEIMPSGFQQDLTELEAPQQVGRGPGGGGPGGPGGGRDGGRDGRGGGRGGRGGGPGGGRGPGGPGRGGPGGPGGRGGRGGGPGGGGGRGGRGGGPQGGGGR	1041
rpsC_lf.cluster1217	8	Ga0577641_0226160_410_1189	Ga0577641_0226160	1	MGQKVNPIGIRLGITRDWTSRWYAGKRQFPLQVHTDFRVREFLKERLAEASVSRILIERAAKKVNITIQTARPGIVIGKKGEDIEKLRQETAALLGMPVNDVRLNIAEIRKPELDSQLVADSIAQQIEKRVMFRRAMKRAVMSTMRSGALGVKVRVSGRLNGGEIARTEWYREGRIPLHTFRADIDYGLSEANTTYGVIGVKVWIFKGEVFDKSELAQQAAEGEVAAAPSTPLAPAAPPPVTPPALPAPEVAARSDLMA	1868
rpsC_lf.cluster1218	2	Ga0577634_0010357_4453_5232	Ga0577634_0010357	1	MGQKTHPHGFRLGFTKTWNAKWYANTKNYSGLVKEDVTIRTAIRARLRDAAISRIDIERSTNQVTVTIHTAKPGVVIGKGGAKVEELRQVLGKTTGKAVKVNIFEIRFPEVDANLIAENVAQQLERRVSFRKVLKQTVQRAMKSGAKGVRVAVAGRLGGAEMSRREWEREGRVPLHTLRADIDFGRAIAKTTFGTIGVKAWIYRGDIEPAPRQVSSQNTPTSATAPRATPPLPPTPPMPAAPAPVAPAVPAASPAGGAA	10362
rpsC_lf.cluster1219	1	Ga0577625_0098255_766_1545	Ga0577625_0098255	1	MGRKVHPESLRVGYIHDWKATWFNEKEFDEYLLEDIKIRAHIEGKLAHAGLSTITIKKNKNEVEVNIHTARPGIVIGKSGSEVDALRRDLHKLTGKSVKVNILEIKRPELDAKLVAQSIAEQLQNRVAFRRAMKRALTSAMRSGAKGVRIQVSGRLGGAEMARTEGYSDGRVPLHTLRADIDYGFYEARTTFGRIGCKVWINKGEIMPKGFAQDLTQMEAPQQASGGGGGGGGRDGNGRGRGGGPGGRGGRGGRGGGGR	2967
rpsC_lf.cluster122	1	Ga0577631_0379518_3_1052	Ga0577631_0379518	1	MGQKVHPNAFRLGIYKPWQARWYADKDYTEQLLEDVNMRRLILNRLRNAGISKVETERSANQATVIIWTAKPGIVIGKGGASVDQLRDDLEKMTGKKVRVTIQEIKHPELDAMLVAQNVAAQLERRIAFRRAVKQSVLRTMRAGAKGVKIMVSGRLGGAEMSRREWDRDGRVPLHTLKADIDFGQTEARTTFGRIGVSVWVYLGDFDLTSREETFDEIPARQLLDETRAGALQVQATPTNGAAAEAAPALGVTEASAAVPAPAAAPPEPSPAPTEPAPAAPAAAREGAGEAAARPKRAPRAAVARPAADAGAKPKPAPRKAGSRAQGTPAAVDAEAPLTNTVAEPATPEA	1124
rpsC_lf.cluster1220	8	Ga0480585_0002455_4677_5456	Ga0480585_0002455	1	MGQKVNPYGFRLGITTDHVSRWFSDSTKAGQRYSDYVAEDVKIRRLLQTSLDRAGVSRIEIERTRDRVRVDIHTARPGIVIGRRGAEAERIRSDLEKLTKKQIQLNILEVKNPEADAQLVAQGIAEQLSARVAFRRAMRKGLQGAQRAGAKGVRIQVSGRLGGAEMSRSEFYREGRVPLHTLRANIDYGFYEAKTTFGRIGVKVWIYKGDITNKELAREQANTKSVRPDRNSDRPRRGAAGARTAPAAEATPVAAGVEA	7164
rpsC_lf.cluster1221	1	Ga0577615_0705320_133_912	Ga0577615_0705320	1	MGQKVNPVGLRVGVNRTWDSRWFAGRAEYGRLLHQDMKMREHIMQQRRQAGISKVVIERPHKKCRVTVHTARPGVLIGKKGADIEKLRSQLARFTDSEVHLNILEIRKPEIDATLVAEAIAQQLERRVAFRRAMKRAVQSALRLGALGIRINVAGRLGGAEIARTEWYREGRVPLHTLRADIDFGYGIAKTAYGVIGIKVWIFKGEIMEHDPMASEKRAGELQESGGGGRRRDGDRDRGGERRERAPERPAEGGEKAKT	1093
rpsC_lf.cluster1222	1	Ga0577625_0149999_941_1720	Ga0577625_0149999	1	MGQKANPIGNRLGIIRGWESNWYGSKKDYAGKLIEDNKIRTYLNARINKGGISKIVIERTLGKLIITIHTSKPGIIIGKGGGEVDRIKEELKKLTSKDDVQINILEIRRPELDAMIVADTVARQIENRINYKRAIKMSIASALRMGAEGIKVKVSGRLGGAEIARTEEIKQGRVPLHTFRMDIDYANVFALTVYGKIGIKVWICKGEILTKRDLNPNFVGGKSEVSDRRERRDDRHDRRDDRRGGGGDRRGGGRGDRRS	2390
rpsC_lf.cluster1223	1	Ga0577630_0146730_1212_1988	Ga0577630_0146730	1	MRVGYIHDWKSNWFNEKHFAEYLAEDVRIREHITNKLAHAGLSSITIRKDSNELEVNIHTARPGIVIGKSGSEVDALRRDLHKMTNKQIKVNILEIKRPELDASLVAQSIAEQLQNRVAFRRAMKRALTSAMRSGAKGVKVQVSGRLGGAEMARTESYSDGRVPLHTMRADIDYGFYESRTTFGRIGVKCWINKGEIMPEGYTGADLTDMTAPAPPGNDRDGRGGRDGRDGRGRGRGGGGPGGRGGGPGGQGTRGGRGG	1989
rpsC_lf.cluster1224	1	Ga0577616_0255948_377_1156	Ga0577616_0255948	1	MGQKIHPEGFRVGYIHDWKSTWFEEKNFADVLQEDLQIRDHIVAKLSHAGLSNITIERRGEVAVDIHTARPGIVIGKSGSEVDALRKELHKLTGSPVKVNIREVKRPELDAKLVAQSIAEQLQNRVAFRRAMKRALTSAMRSGAKGVKVQVSGRLGGAEMARTESYSDGRVPLHTLRADIDYGFFEARTTTGRIGVKCWINKGEVMPEGFRSDLASTDGEPQGNQRGRQGGGRGPGGDRGDRGGRGGGGGRGPRGGGGR	1537
rpsC_lf.cluster1225	1	Ga0580224_0217860_279_1055	Ga0580224_0217860	1	MRVGYIHDWKSNWFNERHFADYLEEDLKVRDHIINKLAHAGLSDITIRKNANELEVNIMTARPGIVIGKSGSEVDALRKDLHRMTRKQIKVNILEIKRPELDAKLVAQSIAEQLQNRVAFRRAMKRALTSAMRSGAKGVKVQVSGRLGGAEMARTEMYSDGRVPLHTLRADIDYGFHEARTTFGRIGVKCWINKGEIMPEGYTGADLTDMNAAPPQSDRDGGRNRDRGRHVDRARRGHPGHRRRVRGCARRGHHGRHGR	1056
rpsC_lf.cluster1226	3	Ga0577618_0743688_336_1115	Ga0577618_0743688	1	VSRVEIERTRDRLRVDVYTARPGIVIGRRGAEADRLRAGLLQITGNPKIHFNIQEIKQPELDATLIAQGVADQLAGRVSFRRAMKRAVQTAMKAGAQGIRVQCGGRLGGAEMSRKEWYREGRVPLHTLRADIDYGQAEARTTFGRIGVKVWIYKGDILPYKSAAEDKISKEAAMAVGETAGQGPSGRRVISAGGGRRRPAEEAVPVEGSPDEEVPAEEAKPLVKEADPALEALLAEEEEIERRTSREHHEAPKFHGDEE	1131
rpsC_lf.cluster1227	1	Ga0577625_0485170_2_778	Ga0577625_0485170	1	MGQKINPVGFRLAVNKNWSSRWYANSKNFAPMLAEDIKVREFLKRKLAHASVGRVLIERPAKDARITIFSARPGVVIGKKGEEIEALKAELRRIMGVQQVHVNIEEIRKPEIDAQLIADSIAQQLEKRIMFRRAMKRAMQNAMRLGAQGIKIMSAGRLNGIEIARTEWYREGRVPLHTLRADIDYGLGEAKTSYGVIGIKVWVYKGEVLPKGELPGAVPGATPAAAQPEAPSEPKRAKKPAPRPGAKRGPPRPRSDGDK	1285
rpsC_lf.cluster1228	3	Ga0577619_00011380_8256_9035	Ga0577619_00011380	1	MGQKINPTGFRLGINRTWDSRWYAGKTEYGKLLHEDIAIRAALAKPLKQAAVSKIIIERPHRKCRVTIHSARPGVVIGKKGADIEKLRREVARITDSDVVLNIIEIRKPEIDAKLVAESIAQQLERRVAFRRAMKRAMQSAMRLGAEGIRISCSGRLGGAEIARLEWYKEGRVPLHTLRADVDYGVATAFTTYGTCGVKVWIFKGEILEHDPMAQDKRMAEAEAAGSGGGGDHRERDRERRPRRDNRGDRGRGRDNRDN	11367
rpsC_lf.cluster1229	1	Ga0577632_0351972_3_779	Ga0577632_0351972	1	MGQKVHPESIRVGYIHDWKSNWFNERQFSDYLHEDLQIRDHIIRRLSHAGLSDITIRKNASEVEVNIHTARPGIVIGKSGSEVDQLRRDLHRITSKQVKVNILEIKRPELDARLVAQSIAEQLQNRVAFRRAMKRALTSAMRSGAKGVKVQVSGRLGGAEMARTEGYSDGRVPLHTLRADIDYGFHEARTTFGRIGVKCWINKGEIMPEGYTGADLTIMDEPAPQAPDRGARDGRGGRDGRGRGGSGGGPGGAGGRGGG	1475
rpsC_lf.cluster123	1	Ga0480586_0080083_582_1631	Ga0480586_0080083	1	MGQKIHPGGMRVGVIHDWKSNWYTGKKEFPQYLLEDVKIREHIYKKLAHAGLSDILIRKDKQRITVDIYTARPGIVIGKSGVEVDALRRELHALTQKNVHININEIKRPELDAKLVAQSIAEQLSNRVAFRRAMKRALASAIRSGAAGVKIQCSGRLGGGEMSRRETYNEGRVPLHTIRADIDYGFVEARTSAGRIGVKVWINKGEIMPEGFESITGGEQRLGDQDARRRRGGATEGLGASRESGRGRTQDREGLGPVKRRRGPGGGAGGGAGGAGGRGGAGGRGPGGAGGRGPGGAGGAGGRGPGGPGGAGGAGGGGRGRGPAQGSRPASSRPRPQDNVEKPRTDDNAV	1632
rpsC_lf.cluster1230	4	soilwarming_3_heated_10-20_052016_S46_18383_1	soilwarming_3_heated_10-20_052016_S46_18383	1	MLAEDIKVRGFLKRKLAHASVGRVLIERPAKDARITIFSARPGVVIGKKGEEIEALKAELRRLMGVNQVHVNIEEIRKPEVDAQLIADSIAQQLEKRIMFRRAMKRAMQNAMRLGAQGIKIMSSGRLNGIEIARTEWYREGRVPLHTLRADIDYGLGEAKTSFGVIGIKVWVYKGEVMPKGEVQAALPSAAPAAQPEAPAEPRRAKKPVPKPGARRPSGRPRPEGERKAAKKPDAPAPKTTVKRPKKVLKEEGGGTKE	1037
rpsC_lf.cluster1231	2	Ga0577624_0438247_103_879	Ga0577624_0438247	1	MGQKVNPLGIRLGITRDWTSRWYAGKRQFPMHVHTDFRVREFLKQRLAEASVSRILIERAAKKVNITIQTARPGIVIGKKGEDIEKLRQETASLLGMPVNDVRLNIAEIRKPELDAQLVGDSIAQQIEKRVMFRRAMKRAVMSTMRSGALGVKVRVSGRLNGSEIARTEWYREGRIPLHTFRADIDYGLSEAHTTYGVIGVKVWIFKGEVFDKSELAQQAAEGEAAAPSTPLAAAPAQPATPPALPAAEVAARSDLMA	1350
rpsC_lf.cluster1232	1	Ga0577626_0643934_502_1278	Ga0577626_0643934	1	QLTVTIHTAKPGIVIGKGGASVDQLREDLEKRFGNRVRISIQEIKQPELDAQLVAENIASQIERRISYKRAMKQAILRTMRSGAKGVRIYCGGRLRGAEMARREWDREGRVPLHTLRANIDFGRATASTTFGAIGVKCWIYKDVAAPLRKQPVAADATAPIAEIAPQPELADVLAEQPLAAVLVATPEPEVATPAPKRARTTTTTAKPKAEPKAKAEVKAEPKAKAAPAGRAQGATSKVKAEAKAPAKKTTTTKKTKS	1278
rpsC_lf.cluster1233	8	Ga0577625_0051062_598_1374	Ga0577625_0051062	1	VGQKVHPIGYRLGFTKTWNAKWFAEAKNYRILLKEDIAIRTTIRGRLRDAAIARIDIERSTNQVTVTIQTAKPGVVIGKGGAKVEELRQALGKATGKVVKVNIFEIRYPELDANLIAENVAQQLERRVSFRKVLKQTVSRSMKAGAKGVRVAVAGRLGGAEMSRREWEREGRVPLHTLRADIEFGRAIAKTTFGTIGVKAWIYRGDIEPAPRQVSQNAPAAAARPAVLGAPASVGAPAPVGAPAAVATPVAGGPVGTP	4136
rpsC_lf.cluster1234	1	soilwarming_1_heated_0-10_052018_S16_5348_2	soilwarming_1_heated_0-10_052018_S16_5348	1	MGQKVHPYGFRLGYNKDWHSHWFAKKQYGEFLLEDLKLKRDLKQRFAGAGVSHVDVERAANRLKIVIYTSRPGIIIGRKGAEIDKLKTDLSAKTGREVLVSIQEIHKPELNAQLQAEKIAAQLEKRIAFRRAMRKAVEESLRFGAQGIKVKVSGRLNGAEIARSEWHLQGRLPLHTLRADIDYGLAEAKTTFGQIGVKVWIYRGEILDAKAAMARGTGSDPINETRMGERERRPRTRREREGGGGSDGRRPRGEGQSQ	1536
rpsC_lf.cluster1235	2	soilwarming_unheated_30-45_052018_S3S8S13_122537_2	soilwarming_unheated_30-45_052018_S3S8S13_122537	1	MGQKTHPHGFRLGFTKTWNAKWYANTKNYSGLVKEDVTIRSAIRARLRDAAIARIDIERSTNQVTVTIHTAKPGVVIGKGGAKVEELRQVLGKTTGKAVKVNIFEIRFPEVDANLIAENVAQQLERRVSFRKVLKQTVQRAMKSGAKGVRVAVAGRLGGAEMSRREWEREGRVPLHTLRADIDFGRAIAKTTFGTIGVKAWIYRGDIEPAPRQVSSQNTPTSATAPRATPPLPPTPPMPAAPVPAAPVAPATPAGGAA	1418
rpsC_lf.cluster1236	2	Ga0577616_0629532_5_781	Ga0577616_0629532	1	MLAEDIKVRDFLKRKLAHASVGRVLIERPAKDARITIFSARPGVVIGKKGEEIEALKAELRRLMGVNQVHVNIEEIRKPEVDAQLIADSIAQQLEKRIMFRRAMKRAMQNAMRLGAQGIKIMSSGRLNGIEIARTEWYREGRVPLHTLRADIDYGLGEAKTTFGVIGIKVWVYKGEVMPKGEVQAALPSAAPAAQPETPAEPRRAKKPVPKPGARRPSGRPRPEGERKAAKKPDVPAPKTTVKRPKKVLKEEGGGTKE	1009
rpsC_lf.cluster1237	1	Ga0577615_0000171_31495_32268	Ga0577615_0000171	1	MGQKIHPEGFRVGYIHDWKSTWFEEKNFADVLQEDLQIRDHIVAKLSHAGLSNITIERRGEVAVDIHTARPGIVIGKSGSEVDALRKELHKLTGSPVKVNIREVKRPELDAKLVAQSIAEQLQNRVAFRRAMKRALTSAMRSGAKGVKVQVSGRLGGAEMARTESYSDGRVPLHTLRADIDYGFFEARTTTGRIGVKCWINKGEVMPEGFRSDLASTDGEPQGNQRGRQGGGRGPGGDRGGRGGDRGGRGGQRGGGR	46479
rpsC_lf.cluster1238	1	Ga0577625_0722035_13_786	Ga0577625_0722035	1	LAVSRNWASRWYANNNNFAAMLQEDIGVREYLKKKLKNASVGRVVIERPAKNARITIFSSRPGVVIGKKGEDIELLKSELQKRMGVPVHVNIEEIRKPETDAQLIADSITQQLERRIMFRRAMKRAMQNAMRLGAQGIKIMSAGRLNGIEIARTEWYREGRVPLHTLRADIDYATSEAKTTYGIIGVKVWVYKGDTLGRNDAPVVEEVAEEKRPRRNARPGGDRRPRRDGEGGGPAGARRGAPRRAGGAGGDGKTGE	1030
rpsC_lf.cluster1239	5	Ga0577637_0102543_302_1075	Ga0577637_0102543	1	MGQKTHPHGFRLGFTKTWNAKWYANTKNYSGLVKEDVTIRSAIRARLRDAAISRIDIERSTNQVTVTIHTAKPGVVIGKGGAKVEELRQVLGKTTGKAVKVNIFEIRFPEVDANLIAENVAQQLERRVSFRKVLKQTVQRAMKSGAKGVRVAVAGRLGGAEMSRREWEREGRVPLHTLRADIDFGRAIAKTTFGTIGVKAWIYRGDIEPAPRQVAQNTPTGATAPRATPPLPPTPPLAAAPVPAAPVAPAAPAGGAV	1780
rpsC_lf.cluster124	4	Ga0577633_0100600_1914_2966	Ga0577633_0100600	1	LGHKVHPNAFRLGVFRPWEANWFANPKDYTKMLHEDLEMRRVILSRLRNAGIAKIETERSSNAQLTVTIHTAKPGIVIGKGGSSVDQLREDLEKRFGNRVRISIQEIKQPELDAQLVAENIASQIERRISYKRAMKQAILRTMRSGAKGVRIYCGGRLRGAEMARREWDREGRVPLHTLRANIDFGRATANTTFGAIGVKCWIYKDQLAPQRRLAPVAEATVPLAEVIAPQADILEVLAQPQVEAEVVTATPEPAAAPRRVRTTAAPKAAPKAEPEPEPEAEAKPKAPARTAATRPKAAPKPKAEASAKPATAKPATAKPAAKKAAGRAQGAPEPAKAPAKRPTTKRTKS	3376
rpsC_lf.cluster1240	1	Ga0577619_01353148_2_772	Ga0577619_01353148	1	MGQKVHPESMRVGYIHDWKSNWFNERNFADYLHEDTQIREHIIGRLSHAGLSDITIRKNATEVEINIHTARPGIVIGKSGSEVDQLRRDLHRITNKQVKVNILEIKRPELDARLVAQSIAEQLQNRVAFRRAMKRALTSAMRSGAKGVKVQVSGRLGGAEMARTEGYSDGRVPLHTLRADIDYGFHEARTTFGRIGVKCWINKGEIMPEGYTGADLTIMDEPAPQAPERGGRDGRGGRDGRSAGPGGRGGGGAGGSG	1104
rpsC_lf.cluster1241	1	Ga0577625_0103539_2_772	Ga0577625_0103539	1	MGQKVHPGGLRVGIIHDWKSNWYSRKEFSRYLIEDLRIREHIYGKLSHAGLSDIHIRKDTQKVTVDIYTARPGIVIGKSGVEVDALRRELHALCGRPVQININEIKRPELDAKLMAQSVAEQLQNRVSFRRAMKRSLASAVRSGAQGVKVQCGGRLGGTEMSRSEKYSEGRVPLHTLRADIDYGFAEAKMTYGRIGVKVWINKGEIMPEGYEGGDGQTTRLGEVDARRRRGGARVAEGELGPARPQRRGRGGGPGGG	2888
rpsC_lf.cluster1242	2	Ga0577619_00136765_2420_3193	Ga0577619_00136765	1	VGQKVNPHGFRLGITTDFKSRWYADKLYKEYVAEDVAIRRMLQRGMERAGISKVEIERTRDRVRVDIHTARPGIVIGRRGAEADRIRGDLEKLTAKQIQLNILEVRNPEADAQLVAQGVAEQLSSRVSFRRAMRKAIQSAMKSPEVKGIRVQCSGRLGGAEMSRSEFYREGRVPLHTLRANIDYGFYEARTTFGRIGVKVWIYKGEALTSRAGREAQAAQAALRAAGQQRNQRPRGGGDAPRRRRAPETAAAAEQEG	3883
rpsC_lf.cluster1243	1	Ga0577619_00716059_14_787	Ga0577619_00716059	1	VGQKVNPHGFRLGITTDFKSRWYADKLYKEYVAEDVAIRRLLQRGMERAGISKVEIERTRDRVRVDIHTARPGIVIGRRGAEADRIRGDLEKLTAKQIQLNILEVRNPEIDAQLVAQGVAEQLSSRVSFRRAMRKAIQSAMKGGAKGIRVQCSGRLGGAEMSRSEFYREGRVPLHTLRADIDYGFYEARTTFGRIGVKVWIYKGEAPTSRAGREAQAAQAALRAAGQQRNQRPRGGGGDAPRRRRAPETAAVAEQEG	1622
rpsC_lf.cluster1244	3	Ga0577620_0146186_141_914	Ga0577620_0146186	1	MGQKVNPIGLRLGINRTWDSRWYSGKGEYGQLLHEDMKIRKELMEDLKQAAVSKIIIERPHKKCRVTVQSARPGVVIGKKGADIEKLRKKVAKLTKSDVVINIVEIRKPELDAQLVAESIAQQLERRVAFRRAMKRAVQSAIRLGALGIRINCAGRLGGAEIARVEWYREGRVPLHTLRADIDFGYGLAKTAYGVIGVKVWIFKGEIMEHDPMASEKRAVEAQEGGGGGRRRAGGGSGGDRDGGWTGGERQAEPAKA	1638
rpsC_lf.cluster1245	15	Ga0480449_0029378_1070_1843	Ga0480449_0029378	1	MGQKINPTGLRLGINRTWDSRWFAGKNEYGKLLHEDMKIRQVLAKPLKQAAVSKIIIERPHRKCRVTIHSARPGVVIGKKGADIEKLRREVARITDSDVVLNIIEIRKPELDARLVAESIAQQLERRVAFRRAMKRAVQSAMRLGAEGIRINCSGRLGGAEIARLEWYREGRVPLHTLRADVDYGTATAFTTYGTCGVKVWIFKGEILEHDPMAQDKRMAEAEAAGGGERERDRDRGPRGPRREGRGDRDRRGDRDR	4055
rpsC_lf.cluster1246	1	Ga0577619_00530386_1155_1925	Ga0577619_00530386	1	VGRKVHPNGFRLGVYRSWEANWFAADKDYLKLLHEDLEMRRLIMRRLRNAGIAKIETERSSNAQLTVTIHTAKPGIVIGKGGASVDQLREDLEKRFQNRVRISINEIKQPELDAQLVAENIASQIERRISYRRAMKQSILRTMRAGAKGVRIAAGGRLRGSEMARREWDREGRVPLHTLRADIDFGRATAKTTFGVIGVKCWIYKGLVAGPKRGGDLEAAFPQPGAGVTPTPPGAAAAEAVPAPIAEAVPAPIAEAV	1925
rpsC_lf.cluster1247	1	Ga0577619_01484344_1_771	Ga0577619_01484344	1	LGHKVHPNAFRLGVFRPWEANWFANPKDYTKMLHEDLQMRSAILARLRNAGIAKIETERSSNAQLTVTIHTAKPGIVIGKGGSSVDQLREDLEKRFGNRVRISIQEIKQPELNAQLVAENIASQIERRISYKRAMKQAILRTMRAGAKGVRIYCGGRLRGAEMARREWDREGRVPLHTLRADIDFGRATAKTTFGAIGVKCWIYKDQITPKARPPITDGAPIGDAIAPQPEAPVDVASQPVAVVETAQAEPAIAEVA	1041
rpsC_lf.cluster1248	1	Ga0577627_0112357_18_791	Ga0577627_0112357	1	MRSGAQGIKIRVGGRLGGAEMSRSETYSEGRVPLHTIRADIDYGFVEAKTTFGRIGVKVWINKGEIMPEGYGGAAEGTRLGDQDQARRRGGALEGLGASRESARNRSQDREGLGPVKRRRGPGGPGGPGGAKRSGGRPGGARPRSSDRARGGPRPDAPPAPEGRDRPLVDPKALAEQTSAAPQVETPPAVEIPQVVEPQVEATPAPAVEAPAPAAEKPVAEKKPAAAKKPAAPKKPAAEKKPAAEKKPAAPRKKKED	3246
rpsC_lf.cluster1249	2	soilwarming_3_heated_60-80_052018_S30_740_10	soilwarming_3_heated_60-80_052018_S30_740	1	MGHKVHPYGFRIGINKPWLAKWYADKDYATLLQEDMKIRALVSKQLANASVSQVEIERGINHVTVTVHSAKPGIVIGKGGQNVELLRTSIGKLTDKKVKLEIKEILQPELDAVLVAQNVAGQLERRIAFRKAVKQTVQRTIKAGAKGVKIQVSGRLGGAEMSRTEWDKEGRIPLGTLRADISYGLVHARTTYGRIGVKVWVYRGDQLGERPGSARTEPREPRQRPTTRTRTKAATSATSAATAAAVESTPAGAGEEA	11879
rpsC_lf.cluster125	9	Ga0577640_0270602_92_1144	Ga0577640_0270602	1	MGQKVHPGGMRVGVIHDWKSNWYTGKKEFPGYLIEDIKIREHITNKLSHAGLSDILIRKDKQRVTVDIYTARPGIVIGKSGVEVDALRKELHAITKKNVHININEIKRPELDAKLVAQSIAEQLQNRVSFRRAMKRALASGIRSGAKGVRIQCGGRLGGTEMSRSEAYSEGRVPLHTIRADIDYGFVEAKTTFGRIGVKVWINKGEIMPEGYGGLDTEKDVRLGEQDQARRRRANVEGLGASREGGRDRQRDREGLGPVRPGRKRSGQGRGGQGRGQGRGGRPAPRSRAGEQDNVERPRTDETATPAEGREKPPVEPTVETTPAPVADAPDTTTPKQQTEDPTKQEKADT	1376
rpsC_lf.cluster1250	2	Ga0480585_0023902_1516_2289	Ga0480585_0023902	1	MGQKTHPHGFRLGFTKTWNAKWYANKKNYRILLKEDVSIRSAIRSRLRDAAIARIDIERSTNQVTVTIHTAKPGVVIGKGGAKVEELRQVLGKTTGKAVKVNIFEIRFPEVDANLIAENVAQQLERRVSFRKVLKQTVQRAMKSGAKGVRVAVAGRLGGAEMSRREWEREGRVPLHTLRADIEFGRAIAKTTFGTIGVKAWIYRGDIEPAPRQVSQNTPNATTAPRATPPMPPAPPLPAAPVPAAPVAPAVPAGGAV	2929
rpsC_lf.cluster1251	3	Ga0577615_0477039_519_1292	Ga0577615_0477039	1	MGQKVNPIGIRLGITRDWTSRWYAGKRQFPLHVHTDFRVREFLKKRLAEASVSRILIERAAKKVNITIQTARPGIVIGKKGEDIEKLRQETAGLLGMPMNDVRLNIAEIRKPELDAQLVGDSIAQQIEKRVMFRRAMKRAVMSTMRSGALGVKVRVSGRLNGSEIARTEWYREGRIPLHTFRADIDYGLSEAHTTYGVIGVKVWIFKGEVFDKSELAQQASEAEAAAAPSAAAAPAQPVTPPAPPAPEVAARSDLMA	1369
rpsC_lf.cluster1252	6	soilwarming_1_heated_0-10_052018_S16_158_9	soilwarming_1_heated_0-10_052018_S16_158	1	MGQKVHPYGFRLGYNKDWHSHWFAKKQYGEYLLEDLKLKRDLKQRFAGAGVSHVDIERAANRLKIIIYTSRPGIIIGRKGAEIDKLKSDLSTKTGREVLVSIQEIHKPELNAQLQAEKIAAQLEKRIAFRRAMRKAVEESLRFGAQGIKVKVSGRLNGAEIARSEWHLQGRLPLHTLRADVDYGLAEARTTFGQIGVKVWIYRGEILDAKAAMARGTGSDPINETRMGERERRPRTRREREGGGGSDGRRPRGENG	5257
rpsC_lf.cluster1253	2	soilwarming_3_unheated_0-10_052018_S11_11_157	soilwarming_3_unheated_0-10_052018_S11_11	1	MGQKVHPYGFRLGYNKDWHSHWFAKKNYAEYLLEDLKLKRDLKQRFAGAGVSHVDIERAANRLKIIIYTSRPGIIIGRKGAEIDKLKSDLSAKTGREVLVSIQEIHKPELNAQLQAEKIAAQLEKRIAFRRAMRKAVEESLRFGAQGIKVKVSGRLNGAEIARSEWHLQGQLPLHTLRADVDYGLAEARTTFGQIGVKVWIYRGEILDAKAAMARGTGSDPINETRMGERERRPRTRREREGGGGSDGRRPRGENG	290244
rpsC_lf.cluster1254	2	Ga0577626_0169145_437_1207	Ga0577626_0169145	1	MGQKVNPLGIRLGITRDWTSKWYAGKKQFPQHVYTDWRVRGFLRSRLSEASVSRIQIERAAKKVNITIQTARPGIVIGKKGEDIEKLRLETAKLLGMPIGDVRLNIAEIRKPELDAQLVADSIAQQIEKRVMFRRAMKRAVMSTMRSGALGVKVRVSGRLNGGEIARTEQYREGRIPLHTFRADIDYGLSESHTTYGVIGVKVWIFKGEVFDKAQIEQAAAEGEAAQGAGAPAPAPAQAPAPAVTAVPPAEATAQA	2741
rpsC_lf.cluster1255	10	soilwarming_3_unheated_45-60_052018_S14_95_6	soilwarming_3_unheated_45-60_052018_S14_95	1	MGQKVHPYGFRLGYNKDWHSHWFAKKQYGEYLLEDLKLKRDLKQRFAGAGVSHVDIERAANRLKIIIYTSRPGIIIGRKGAEIDKLKTDLSAKTGREVLVSIQEIHKPELNAQLQAEKIAAQLEKRIAFRRAMRKAVEESLRFGAQGIKVKVSGRLNGAEIARSEWHLQGQLPLHTLRADIDYGLAEARTTFGQIGVKVWIYRGEILDAKAAMARGTGSDPINETRMGERERRPRTRREREGGGGSDGRRPRGENA	10312
rpsC_lf.cluster1256	8	soilwarming_3_unheated_10-30_052018_S12_1036_10	soilwarming_3_unheated_10-30_052018_S12_1036	1	MGQKVHPYGFRLGYNKDWHSHWFAKKQYGEYLLEDLKLKRVLKQRFAGAGVSHVDIERAANRLKIIIYTSRPGIIIGRKGAEIDKLKSDLSAKTGREVLVSIQEIHKPELNAQLQAEKIAAQLEKRIAFRRAMRKAVEESLRFGAQGIKVKVSGRLNGAEIARSEWHLQGQLPLHTLRADIDYGLAEAKTTFGQIGVKVWIYRGEILDAKAAMARGTGSDPINETRMGERERRPRTRREREGAGGSDGRRPRGENA	8800
rpsC_lf.cluster1257	8	Ga0577625_0174873_487_1257	Ga0577625_0174873	1	VGQKVHPYGFRLGYNKDWHSHWFAKKQYGEFLLEDLRLKRVLKQRFTGAGVSHVDIERAANRLKIINYTSRPGIIIGRKGAEIDKLKSDLSAKTGREVLVSIQEIHKPELNAQLQAEKIAAQLEKRIAFRRAMRKAVEESLRFGAQGIKVKVSGRLNGAEIARSEWHLQGQLPLHTLRADIDYGLAEAKTTFGQIGVKVWIYRGEILDAKAAMARGTGSDPINETRMGERERRPRTRREREGGGGSDGRRPRGENA	2207
rpsC_lf.cluster1258	7	Ga0577615_0019026_1255_2025	Ga0577615_0019026	1	VGQKVHPYGFRLGYNKDWHSHWFAKKQYGEYLLEDLRLKRDLKQRFAGAGVSHVDIERAANRLKIIIYTSRPGIIIGRKGAEIDKLKTDLSAKTGKEVLVSIQEIHKPELNAQLQAEKIAAQLEKRIAFRRAMRKAVEESLRFGAQGIKVKVSGRLNGAEIARSEWHLQGQLPLHTLRADIDYGLAEARTTFGQIGVKVWIYRGEILDAKAAMARGTGSDPINETRMGERERRPRTRREREGGGGSDGRRPRGENG	6375
rpsC_lf.cluster1259	2	Ga0577618_0001336_11416_12186	Ga0577618_0001336	1	MGHKVHPYGFRIGINKPWLAKWYADRDYATLLREDMRIRQLVSKQLANASVSQVEIERGINHVTVTVHSAKPGIVIGKGGQNVELLRTSVGKLTDKKVKLEIKEILQPELDAVLVAQNVAGQLERRIAFRKAVKQTVQRTIKAGAKGVKIQVSGRLGGAEMSRTEWDKEGRIPLGTLRADISYGVVHARTTYGRIGVKVWIYRGDQLGERPGSARTEPRQPRERPTRGRSRAGSTSTSPVAAATAASEAATRAEEA	21048
rpsC_lf.cluster126	3	Ga0577633_0023393_2659_3711	Ga0577633_0023393	1	MGQKVHPIGFRLGVYRNWDARWYADKDYTALLHEDIAIRRLIGGRLRNAGVARIETERRGNELTVTIQTAKPGIVIGKQGASVDALRDELEKITAKKVRVTIHEIKTPELDAKLVAENVASQLEKRIAFRRALKQTLLRSMRAGAKGCKIQVSGRLGGAEMSRREWDRGGRVPLHTLRANIDYGQAEARTTFGRIGVQAWIYKGDFVTATGEPISGTSVREADESESTDSLERAPAAEAPVRARATTAAAEPAPAAAVVIEESAVDLSAEDTEADDAEPDVDADDDAVVAAVGAIPEDGKKVEKLVSKRKAPAAAKKPSGRAAAKPSPARKPAARKPSGGTSPDSAAEEE	6883
rpsC_lf.cluster1260	1	Ga0577640_0231863_3_773	Ga0577640_0231863	1	TAKPGIVIGKGGASVDKLREDLEKQFGNRVRISIQEIKQPELDAQLVAENIASQLERRISHRRAMKQSILRTMRSGAKGVRIAMAGRLRGAEMARREWDREGRVPLHTLRADIQFGRATAKTTFGMIGIKVWIYRDMVKGRTRGGETQATIAPQPTEAEVANAQQAAQQGGPGGPGGRPGGQRPRRRGGRGRTGGGGQGGQGQGGGGQSQGQGGQGSGGQGQSGQGQSGQGQSGQGQSGQGQARSDGGREGGSAPA	1490
rpsC_lf.cluster1261	3	Ga0577625_0021243_2944_3714	Ga0577625_0021243	1	MGQKTHPHGFRLGFTKTWNAKWYANKKNYRVLLKEDITIRTAIRSRLRDAAISRIDIERSTNQVTVTVHTAKPGVVIGKGGAKVEELRQVLGKTTGKAVKVNIFEIRFPEVDANLIAENVAQQLERRVSFRKVLKQTVQRAMKSGAKGVRVAVAGRLGGAEMSRREWEREGRVPLHTLRADIDFGRAIAKTTFGTIGVKAWIYRGDIEPAPRQVAQGGVQTGAVAPRATPPMPPAPAAPVAPASPVSPAAPAGGAA	6465
rpsC_lf.cluster1262	11	Ga0480441_000639_3501_4271	Ga0480441_000639	1	MGQKTHPHGFRLGFTKTWNAKWYANSKNYRVLLKEDVSIRGAIRARLRDAAISRIDIERSTNQVTVTIHTAKPGVVIGKGGAKVEELRQVLGKTTGKAVKVNIFEIRFPEVDANLIAENVAQQLERRVSFRKVLKQTVQRAMKSGAKGVRVAVAGRLGGAEMSRREWEREGRVPLHTLRADIDFGRAIAKTTFGTIGVKAWIYRGDIEPAPRQVAQGGVQTGAVAPRATPPMPPTPIAPAPPVSPAAPVAPAGGAV	4585
rpsC_lf.cluster1263	1	Ga0506675_0191990_203_973	Ga0506675_0191990	1	MGQKVNPIGIRLGITRDWTSRWYAGKRQFPMHVHTDFRVREFLKQKLAEASVSRILIERAAKKVNITIQTARPGIVIGKKGEDIEKLRQETATLLGMPVNDVRLNIAEIRKPELDAQLVGDSIAQQIEKRVMFRRAMKRAVMSTMRSGALGVKVRVSGRLNGSEIARTEWYREGRIPLHTFRADIDYGLSEAHTTYGVIGVKVWIFKGEVFDKSELAQQASEAEAAPAPSTPLAAAPAQPATPPAPEVAARSDLMA	1471
rpsC_lf.cluster1264	8	soilwarming_2_unheated_45-60_052018_S9_747_9	soilwarming_2_unheated_45-60_052018_S9_747	1	MGQKVNPIGIRLGITRDWTSRWYAGKRQFPLQVHTDFRVREFLKERLAEASVSRILIERAAKKVNITIQTARPGIVIGKKGEDIEKLRQETAALLGMPVNDVRLNIAEIRKPELDSQLVADSIAQQIEKRVMFRRAMKRAVMSTMRSGALGVKVRVSGRLNGGEIARTEWYREGRIPLHTFRADIDYGLSEANTTYGVIGVKVWIFKGEVFDKSELAQQAAEGEVAAAPSTPLAPAAPPPVTPPAPEVAARSDLMA	12575
rpsC_lf.cluster1265	7	Ga0577620_0034691_1208_1978	Ga0577620_0034691	1	MGQKVNPIGIRLGITRDWTSRWYAGKRQFPLQVHTDFRVREFLKERLAEASVSRILIERAAKKVNITIQTARPGIVIGKKGEDIEKLRQETAALLGMPVIDVRLNIAEIRKPELDSQLVADSIAQQIEKRVMFRRAMKRAVMSTMRSGALGVKVRVSGRLNGSEIARTEWYREGRIPLHTFRADIDYGLSEANTTYGVIGVKVWIFKGEVFDKSELAQQAAEGEVAAAPSTPVAPAAPPPVTPPAPEVAARSDLMA	3349
rpsC_lf.cluster1266	1	Ga0480585_0220856_3_770	Ga0480585_0220856	1	MGQKVHPIGFRLGVKVGDRSVKDWQGRWFATGREYATLLLEDIRVRQHIMTRMQDAGVSKVEIERSANMITVTIHAAKPGIVIGKSGVKVEELRRNLEAMTGKRIRVTIQEIRQPEIDAFLVARSIADQLEKRVAFRRAMKQAVQRAQRFGAKGVRVQVSGRLGGSEMSRREWDRWGRVPLHTLRADIDFGQTEAHTTYGIIGVKVWVYRGDFTPDGRSPEEVAAEQRQPDRRGPRATVRAEVPEAPAPEAVAPAV	1057
rpsC_lf.cluster1267	5	Ga0480462_012812_226_996	Ga0480462_012812	1	VGQKVHPYGFRLGYNKDWHSHWFAKKQYGEYLLEDLKLKRVLKQRFAGAGVSHVDIERAANRLKIIIYTSRPGIIIGRKGAEIDKLKSDLSAKTGREVLVSIQEIHKPELNAQLQAEKIAAQLEKRIAFRRAMRKAVEESLRFGAQGIKVKVSGRLNGAEIARSEWHLQGQLPLHTLRADIDYGLAEAKTTFGQIGVKVWIYRGEILDAKAAMARGTGSDPINETRMGERERRPRTRREREGAGGSDGRRPRGDSQ	1235
rpsC_lf.cluster1268	2	Ga0480586_0013156_328_1098	Ga0480586_0013156	1	VGQKVHPYGFRLGYNKDWHSHWFAKKQYAEYLLEDLKLKRDLKQRFAGAGVSHVDIERAANRLKIIIYTSRPGIIIGRKGAEIDKLKTDLSAKTGREVLVSIQEIHKPELNAQLQAEKIAAQLEKRIAFRRAMRKAVEESLRFGAQGIKVKVSGRLNGAEIARSEWHLQGQLPLHTLRADIDYGLAEARTTFGQIGVKVWIYRGEILDAKAAMARGTGSDPINETRMGERERRPRTRREREGGGGSDGRRPRGENG	3426
rpsC_lf.cluster1269	1	Ga0577641_0373995_674_1444	Ga0577641_0373995	1	SIAEQLSNRVAFRRAMKRALASAIRSGAAGVKIQCSGRLGGGEMSRRETYNEGRVPLHTIRADIDYGFVEARTSAGRIGVKVWINKGEIMPEGYESVTGGEQRLGDQDARRRRGGATEGLGASRESGRGRSQDREGLGPVKRRRGPGGPAGAAGGGGRGAGGRGAGGAGGGRGPGGAGGRGPGGAGGAGGAGGATGRGRPPAQGARPASSRPRSKETPPPKDSVEKPSSDDQPVVDQPVVEPTAEETPKGDEGAES	1446
rpsC_lf.cluster127	2	Ga0577628_0224201_34_1086	Ga0577628_0224201	1	VGHKINPHGFRLGANPNFTWHSRWYADKSYQAWLQEDLRVRAYIEKTLAHAGISRVDIERKGEDRIQVDIHTARPGIVIGRRGAEVDRIRDDLKNITNKDNIQLNVFEIKQPELEAPLVAQGIAEQLVGRVSFRRAMRRGVQTAMRAGAKGIRVQVGGRLGGAEMSRSEWYREGRVPLHTIRADIDYGFREAHTQFGGRIGVKVWIYRGDVMPTLEEKEAELAKARARAAATGDIIPAAIPPRDRATRERPGTGRGAPGRGAKPAARGTGTRAPRGTGPARAPKAPGAPKAPAAPKAAPKPKAEAPAPEPAAPDAAAPDAAAPEAAAPDAAAPDAAAPDAAAPEAPKADE	1287
rpsC_lf.cluster1270	1	Ga0480446_0069649_3_767	Ga0480446_0069649	1	MGQKVHPYGFRLGVTKTWRSRWFAKQEYSKLLHEDLELKESLLNRLKAAGISSVEVDRPGNKLRITIRTSRPGIIIGRKGAEIEKLKSDLAKKTKREVFIDIQEVHRPELDAQLVSESIAVAFRRAMRKAVDSALRFGCKGIKVRVSGRLNGAEIARSEWYLQGQLPLHTLRADIDYGFSQAYTTYGVIGVKVWIYKGEVLDGASRRDSLRNEGEPRRRRRDDRDRDRERRSFGPPSTAEPVGAVIQPPPSEMPK	1723
rpsC_lf.cluster1271	1	Ga0577642_0653491_253_1020	Ga0577642_0653491	1	VHPYGFRLGINKPWLAKWYADRDYATLLQEDMKIRALVAKQLSNASVSQVEIERGINHVTVTVHSAKPGIVIGKGGQNVELLRNSIGKLTDKKVKLEIKEILQPELDAVLVAQNVAGQLERRIAFRKAVKQTVQRTIKAGAKGVKIQVSGRLGGAEMSRTEWDKEGRIPLGTLRADISYGVVHARTTYGRIGVKVWVYRGDQLGERPGSARTEPREPRQRTTRGRTRTAATAAAATAAAGSSAAEASNASAGEEA	1022
rpsC_lf.cluster1272	2	Ga0577631_0006502_5836_6603	Ga0577631_0006502	1	MGQKVNPIGIRLGITRDWTSRWYAGKKQFPLHVHTDFRVREFLKSRLSEASVSRIQIERAAKKVNITIQTARPGIVIGKKGEDIEKLRQETAKLLGMPVSDVRLNIAEIRKPELDSQLVADSIAQQIEKRVMFRRAMKRAVMSTMRSGALGVKVRVSGRLNGSEIARTEWYREGRIPLHTFRADIDYGLSEAQTTYGVIGVKVWIFKGEVFDKTELEQQSAEGGDAPAQAAPATQPAAAQPAAAQPAAAEAPAQA	7028
rpsC_lf.cluster1273	11	Ga0577628_0054383_1486_2253	Ga0577628_0054383	1	VGQKVHPYGFRLGYNKDWHSHWFAKKQYGEFLLEDLRLKRDLKQRFAGAGVSHVDIERAANRLKIIIYTSRPGIIIGRKGAEIDKLKGDLSSKTGREVLVSIQEIHKPELNAQLQAEKIAAQLEKRIAFRRAMRKAVEESLRFGAQGIKVKVSGRLNGAEIARSEWHLQGQLPLHTLRADIDYGLAEARTTFGQIGVKVWIYRGEILDPKAAMARGTGSDPINETRMGERERRPRTRREREGGGSDGRRPRGENG	2402
rpsC_lf.cluster1274	1	Ga0480452_0354079_2_766	Ga0480452_0354079	1	MGQKVHPNAFRLGIYKPWQARWYGDKDYTDMLIEDMRMRRLILERLRNAGISKVETERSANQATVIIWTAKPGIVIGKGGTSVDQLRDDLEKMTGKKVRVTIQEIKHPELDAALVAQNVAAQLERRIAFRRAIKQSVLRTMRAGAKGVKIAVSGRLGGAEMSRREWDRDGRVPLHTLKANIDFGQTEARTTFGRIGVSAWVYLGDFDLTEPEEAFEEIPARQLLEETRPAPAPPATDGARSPAGGRLGWGSGLRC	1067
rpsC_lf.cluster1275	3	Ga0577643_00047419_1341_2108	Ga0577643_00047419	1	VGQKVHPVGYRLGFTKTWNAKWFAEAKNYRILLKEDIAIRSTIRGRLRDAAIARIDIERSTNQVTVTIQTAKPGVVIGKGGAKVEELRQALGKTTGKVVKVNIFEIRYPELDANLIAENVAQQLERRVSFRKVLKQTVSRSMKAGAKGVRVAVAGRLGGAEMSRREWEREGRVPLHTLRADIEFGRAIAKTTYGTIGVKAWIYRGDIEPAPRQVSQNAPAAAARPAALGALLNAPAPAAPAAPSIATPTGPVGAA	4759
rpsC_lf.cluster1276	3	Ga0577619_00783807_719_1486	Ga0577619_00783807	1	VGQKVHPVGYRLGFTKTWNAKWFAEAKNYRTLLKEDIAIRSTIRGRLRDAAIARIDIERSTNQVTVTIQTAKPGVVIGKGGAKVEELRQALGKATGKVVKVNIFEIRYPELDANLIAENVAQQLERRVSFRKVLKQTVSRSMKAGAKGVRVAVAGRLGGAEMSRREWEREGRVPLHTLRADIEFGRAIAKTTFGTIGVKAWIYRGDIEPAPRQVSQNAPAAAARPAVLGAPAGGGTTPAAAPMPTSGPAASAGPA	1538
rpsC_lf.cluster1277	1	Ga0577626_0893506_38_805	Ga0577626_0893506	1	MGQKVNPYGFRLGITTDHVSRWFSDSTKPGQRYSDFVAEDVKIRRLLQTSLDRAGVSRIEIERTRDRVRVDIHTARPGIVIGRRGAEAERIRSDLEKLTKKQIQLNILEVKNPEADAQLVAQGIAEQLSARVAFRRAMRKGLQGAQRAGAKGVRIQVSGRLGGAEMSRSEFYREGRVPLHTLRANIDYGFYEAKTTFGRIGVKVWIYKGDITNKELAREQANTKSTRPERNDRPRRGGRSNAPAETAPAAAGVEA	1047
rpsC_lf.cluster1278	1	Ga0577634_0266103_2_763	Ga0577634_0266103	1	MGQKVHPHGFRRGISTDWKSRWYADKLYKDYIAEDVKIRRMMSKGLERAGIAKVDIERTRDRVRVDIHTARPGIVIGRKGAEADRIRGELEKLTAKQVQLNIIEVKNPESDAQLVAQGVAEQLSSRVSFRRAMRKAMQSAMKNTLVRGIRVQVSGRLGGAEMSRTEFYREGRVPLHTLRANIEYGFFEARTTFGRIGVKVWIYKGDAVPGREAPAEAAPPRGRRERGDRAERPRRGRSGASGTTGGGTEAGRAA	2170
rpsC_lf.cluster1279	8	Ga0577619_00020164_2818_3582	Ga0577619_00020164	1	VGQKVHPYGFRLGYNKDWHSHWFAKKQYGEFLLEDLRLKRDLKQRFAGAGVSHVDIERAANRLKIIIYTSRPGIIIGRKGAEIDKLKSDLSSKTGREVLVSIQEIHKPELNAQLQAEKIAAQLEKRIAFRRAMRKAVEESLRFGAQGIKVKVSGRLNGAEIARSEWHLQGQLPLHTLRADIDYGLAEARTTFGQIGVKVWIYRGEILDPKAAMARGTGSDPINETRMGERERRPRTRREREGGSDGRRPRGENG	9009
rpsC_lf.cluster128	1	Ga0577618_0077281_1840_2892	Ga0577618_0077281	1	MGQKVNPYGFRLGVTTDWKSRWFSDREYTDYLIEDWHIRDYLMRQLERAAVSRVEVERTRDRLRIDVHTARPGIVIGRRGAEADRLRADLAKITNNVKVQLNIQEIKQPELDAALIAQAVCDQLAGRVSFRRAMKRAVQTAQKAGAQGIRVQCSGRLGGSEMARSEWYREGRVPLHTLRADIDYGFREARTTFGRIGVKVWIYKGDILPYKISGEDKIQREAAMAVGETSGQVRPRRVISAGGGRRKPDQGEPGAEPPPAAEGAEPAEGAEPAEGAEPAEGAVTAEGAVTVEGAEPTEGAEPTEGEEAAAAAPLVKEADPELERLLAEEEEIERRTRQHHETPHFRLGDE	3876
rpsC_lf.cluster1280	1	Ga0577639_0680166_248_1012	Ga0577639_0680166	1	ITIRKDANEVEVNIHTARPGIVIGKSGSEVDALRKDLHRMTRKQIKVNILEIKRPELDAKLVAQSIAEQLQNRVAFRRAMKRALTSAMRSGAKGVKVQVSGRLGGAEMARTEGYSDGRVPLHTLRADIDYGFYEARTTFGRIGVKCWINKGEIMPEGYSGQDLTELEAPSSQAAPGGRGGDGRGRGGPGGRGGGPGGRGGGPGGRGGGPGGRGGGPGGRGGGPGGRGGGPGGRGGGGGGGRGGRRGGGSPEVTR	1013
rpsC_lf.cluster1281	5	Ga0577643_00051484_349_1113	Ga0577643_00051484	1	VGQKVHPYGFRLGYNKDWHSHWFAKKQYGEFLLEDLKLKRDLKQRFAGAGVSHVDIERAANRLKIIIFTSRPGIIIGRKGAEIDKLKTDLSAKTGREVLVSIQEIHKPELNAQLQAEKIAAQLEKRIAFRRAMRKAVEESLRFGAQGIKVKVSGRLNGAEIARSEWHLQGQLPLHTLRADIDYGLAEARTTFGQIGVKVWIYRGEILDAKAAMARGTGSDPINETRMGERERRPRTRREREGGSDGRRPRGENT	4600
rpsC_lf.cluster1282	1	soilwarming_3_unheated_60-80_052018_S15_61_25	soilwarming_3_unheated_60-80_052018_S15_61	1	MGHKVHPYGFRIGINKPWLAKWYADKDYATLLQEDMKIRALVSKQLANASVSQVEIERGINHVTVTVHSAKPGIVIGKGGQNVELLRTSIGKLTDKKVKLEIKEILQPELDAVLVAQNVAGQLERRIAFRKAVKQTVQRTIKAGAKGVKIQVSGRLGGAEMSRTEWDKEGRIPLGTLRADISYGLVHARTTYGRIGVKVWVYRGDQLGERPGSARTEPREPRQRPTTRTRTKAATSAATAAAVESTPAGAGEEA	25844
rpsC_lf.cluster1283	1	Ga0480449_0222854_421_1185	Ga0480449_0222854	1	MSSVKNVINDSYKLMLLKDYLREAIKEAGFADVDIQKTPTGTRVGLHVTRPGIVIGRKGSGIRDLTKVLEKDFDLKNPQISVIEIIKPELQPSVMCNRMSQHLARGTAFRRAVMWTMQTIMNAGAMGVQITISGKLRGERSSFEKHSKGILPRAGHFADIVVSEDIVHVGTKMGRIGVRIRIARKERYIPEFELREIKKEAAKVIPEVEEKEIEVIEEIPIDPTKPRTESELVEIEEKLVEQVETFEEIEEELK	1487
rpsC_lf.cluster1284	1	Ga0577643_00912038_1_762	Ga0577643_00912038	1	LGQKVHPNAFRLGVYKPWQARWFGDRNYTEMLLEDNRMRQLIIERLRNAGISKVETERSANQVTVIIWTAKPGIVIGKGGASVDQLRDDLEKLSGKKVRVTIQEIKHPELDAALVAQNVAAQLERRIAFRRAIKQSVLRTMRAGAKGVKIAVSGRLGGAEMSRREWDRDGRVPLHTLKANIDFGQTEARTTFGRIGVSAWVYLGDFELIEHEDTFEEIPARTLLEEAGPRLAATPVLQEAADAPPAAAAAAGVA	1133
rpsC_lf.cluster1285	4	Ga0577641_0203338_702_1466	Ga0577641_0203338	1	VGQKVNPHGFRLGITTDFKSRWYADKLYKEYVAEDVAIRRLLQRGMERAGISKVEIERTRDRVRVDIHTARPGIVIGRRGAEADRIRGDLEKLTSKQIQLNILEVRNPEADAQLVAQGVAEQLSSRVSFRRAMRKAIQSAMKSQEVKGIRVQCSGRLGGAEMSRSEFYREGRVPLHTLRANIDYGFYEARTTFGRIGVKVWIYKGEAPTSRAGREAQAAQAALRAAGQQRSNQRPRDTQRRRRAPEAAAAGQEG	1969
rpsC_lf.cluster1286	2	Ga0480588_0250727_1_765	Ga0480588_0250727	1	IYSARPGVVIGKKGEDIEALKKELASRLGVPVAVNIEEVRKPEVDAQLIADSITQQLEKRIMFRRAMKRAMQNAMRLGAQGIKIMSAGRLNGIEIARTEWYREGRVPLHTLRADIDYGFSEAKTTYGVIGVKVWVYKGDTLGQRDAPSLDSTPRPEGEERRGPRGPRRDGDRRPGGPGRGGPRGPGGGSGGGGGGAGGGGRTMSGSTNVAPADGSDKPAEATPGADAPKSAVKRVPRKTGAAPAGTPPTDGKGE	1105
rpsC_lf.cluster1287	1	soilwarming_unheated_30-45_052018_S3S8S13_14342_3	soilwarming_unheated_30-45_052018_S3S8S13_14342	1	MGQKVNPIGLRLGINRTWDSRWFADGPDYGRLLHEDIKVRSALKKRLYQAGVSRIVIERPHKKCRITIYAARPGVIIGKKGADIDKLRKDIAAMTDGEVHLNIVEVRKPETDAQLVAENIAQQLERRVAFRRAMKRSLQSGMRLGAKGMRIEVAGRLGGAEIARNESYQEGRVPRHTLRADIDYGVTQAATTYGVIGVKVWVFKGEVLEHDPMALDKRLASESGPAGEGGGGRERGDRPDRGPRRERRGESQNA	3844
rpsC_lf.cluster1288	2	Ga0577625_0227219_44_808	Ga0577625_0227219	1	VGQKVHPYGFRLGYNKDWHSHWFAKKQYGEFLLEDLRLKRVLKQRFAGAGVSHVDIERAANRLKIIIYTSRPGIIIGRKGAEIDKLKSDLSSKTGREVLVSIQEIHKPELNAQLQAEKIAAQLEKRIAFRRAMRKAVEESLRFGAQGIKVKVSGRLNGAEIARSEWHLQGRLPLHTLRADIDYGFAEARTTFGQIGVKVWIYRGEILDPKAAMARGTGSDPINETRMGERERRPRTRREREGGSDGRRPRGENG	1925
rpsC_lf.cluster1289	2	Ga0577624_0339972_459_1223	Ga0577624_0339972	1	MGQKVHPIGYRLGFTKTWNAKWFAEAKNYRILLKEDIAIRSTIRGRLRDAAIARIDIERSTNQVTVTIQTAKPGVVIGKGGAKVEELRQALGKATGKTVKVNIFEIRYPELDANLIAENVAQQLERRVSFRKVLKQTVSRSMKAGAKGVRVAVAGRLGGAEMSRREWEREGRVPLHTLRADIEFGRAIAKTTYGTIGVKAWIYRGDIEPAPRQVSQNAPAAAARPAALGAPAGGATQPVAAPVPSGPAASVGPA	1566
rpsC_lf.cluster129	1	Ga0577631_0199811_393_1445	Ga0577631_0199811	1	MGRKVHPNGFRLGVYRGWEANWFATDKDYLKLLHEDMDMRRLILKRLRNAGIARIETERSSNAQLTVTIHTAKPGIVIGKGGASVDQLREDLEKRFGNRVRISINEIKQPEMNAQLVAENIASQIERRISYRRAMKQSILRTMRAGAKGVRIAAGGRLRGSEMARREWDREGRVPLHTLRADIDFGRATARTTFGMIGVKCWIYKGLVPGRKRGGELDVEGVPQPVDGGTPAPAAAAAAAPTAAPAAAAPAAAAPPAPAPAETAPVVAEAPAAAEASAPAVEAPPAPESAAPAATPVAPAPVEAPPAPEAAEPAATTEPAAAEPAPKAPRKRTTKAKTEPATKDDADAPA	1580
rpsC_lf.cluster1290	4	Ga0480588_0029145_1167_1931	Ga0480588_0029145	1	MGQKTHPQGFRLGFTKTWNAKWYANKKNYRILLKEDVSIRTAIRSRLRDAAIARIDIERSTNQVTVTIHTAKPGVVIGKGGAKVEELRQVLGKTTGKAVKVNIFEIRFPEVDANLIAENVAQQLERRVSFRKVLKQTVQRAMKSGAKGVRVAVAGRLGGAEMSRREWEREGRVPLHTLRADIEFGRAIAKTTFGTIGVKAWIYRGDIEPAPRQVSQNQPNAATAPRATPPMPPAPPVPAAPAPVAPAVPTGGAA	3490
rpsC_lf.cluster1291	5	Ga0506675_0035807_1980_2744	Ga0506675_0035807	1	MGQKVNPIGIRLGITRDWTSRWYAGKRQFPLHVHTDFRVREFLKKRLAEASVSRILIERAAKKVNITIQTARPGIVIGKKGEDIEKLRQETAGLLGMPMNDVRLNIAEIRKPELDAQLVGDSIAQQIEKRVMFRRAMKRAVMSTMRSGALGVKVRVSGRLNGSEIARTEWYREGRIPLHTFRADIDYGLSEAHTTYGVIGVKVWIFKGEVFDKSELAQQASEAEAAAAPSAAAAPAQPVTPPAPEVAARSDLMA	3024
rpsC_lf.cluster1292	1	soilwarming_1_unheated_30-45_052018_S3_6496_3	soilwarming_1_unheated_30-45_052018_S3_6496	1	MGQKVNPIGLRLGINRTWDSRWFADGPDYGRLLHEDIKVRSALKKRLYQAGVSRIVIERPHKKCRITIYAARPGVIIGKKGADIDKLRKDIAAMTDGEVHLNIVEVRKPETDAQLVAENIAQQLERRVAFRRAMKRSLQSGMRLGAKGMRIEVAGRLGGAEIARNESYQEGRVPRHTLRADIDYGVTVATTTYGVIGVKVWVFKGEVLEHDPMALDKRLASESGPAGEGGGGRERGDRPDRGPRRERRGEATNA	2932
rpsC_lf.cluster1293	9	Ga0577620_0000739_4872_5633	Ga0577620_0000739	1	MGQKVHPLGFRLGFVKTWNAKWYAGSKNYPILLKEDVAIRSGIRARLRDAAIARIDIERSTNQVTVTIHTAKPGVVIGKGGAKVEELRQVLGKTTGKTVKVNIFEIRYPELDAVLIAENVAQQLERRVSFRKVLKQTVLRSMKSGAKGVRVAVAGRLGGAEMSRREWEREGRVPLHTLRADIEFGRAIAKTTYGTIGVKAWVYKGDIEPAPRQVAQNTPGGSAQRPVVPPPPPMPAPAPTPAAAATPTPAVGV	17322
rpsC_lf.cluster1294	7	Ga0577628_0072574_695_1456	Ga0577628_0072574	1	MGQKVHPVGYRLGFTKTWNAKWFAEAKNYRTLLKEDIAIRTTIRGRLRDAAIARIDIERSTNQVTVTIQTAKPGVVIGKGGAKVEELRQALGKATGKVVKVNIFEIRYPELDANLIAENVAQQLERRVSFRKVLKQTVSRSMKAGAKGVRVAVAGRLGGAEMSRREWEREGRVPLHTLRADIEFGRAIAKTTFGTIGVKAWVYRGDIEPAPRQVSQNAPAAAARPAVLGAPAAVGASPAPVGAPVASGPVGTP	2128
rpsC_lf.cluster1295	6	Ga0506675_0099791_201_962	Ga0506675_0099791	1	MGHKVNPIGLRVGINRTWDSRWFASRAEYGRLLHEDMHIRDHILKQQRQAGISKVVIERPHKKCRVTVHTARPGVLIGKKGADIEKLRGELARLTQSEVHLNIVEVRKPEIDATLVAETIAQQLERRVAFRRAMKRAVQSAIRLGALGIRINCSGRLGGAEIARVEWYREGRVPLHTLRADIDFGYGLAKTAYGVIGVKVWIFKGEIMEHDPMAAEKRALEAQEGGGGGRRRSGGERDGGWTGGERQAEPAKA	1984
rpsC_lf.cluster1296	9	Ga0577643_00849155_398_1159	Ga0577643_00849155	1	LSVTKYFIKDVSRRLEIDEHLALELKRAGYSHVELTKSPVGTRVVIYAAKPGMVIGRRGQSIRDLTKVLEDKFHIENPQLSVANIDVPEQDPKVVASQVASALQRGVHFRRAAYWALQRVMESQALGVEITIRGKLTTERSRFEKFKAGYLPRVGDPVLKSVKTAVADVQLKQGLFGINVRILPPQTSYIDKPIMLTPPADTTPPPAKPAKETEPVAAPEVVAEVLVEAEPQAEVAVVVEDKEEEETGDSEKA	1179
rpsC_lf.cluster1297	3	Ga0577620_0370195_169_930	Ga0577620_0370195	1	MGQKVNPVGLRLGINRTWDSRWFADGSDYGRLLHEDIKVRRELKKRLYQAGVSRIIIERPHKKCRITIYAARPGVIIGKKGADIDKLRKDVAAMTDGEVHLNIIEIRKPETDAQLVAENIAQQLERRVAFRRAMKRSMQSAMRLGAKGVRINVSGRLGGAEIARMEWYREGRVPLHTLRADIDYGFTEAKTTYGIIGVKVWVFKGEVLEHDPMALDKRLAGESGPAGEGGGRDRAGDRPDRGPRRDRREQANA	1000
rpsC_lf.cluster1298	16	soilwarming_3_heated_60-80_052018_S30_11499_7	soilwarming_3_heated_60-80_052018_S30_11499	1	MGQKVHPLGFRLGFVKTWNAKWYAGSKNYPVLLKEDVTIRSAIRARLRDAAISRIDIERSTNQVTVTIHTAKPGVVIGKGGAKVEELRQVLGKTTGKAVKVNIFEIRYPELDAVLIAENVAQQLERRVSFRKVLKQTVLRSMKSGAKGVRVAVAGRLGGAEMSRREWEREGRVPLHTMRADIEFGRAIAKTTFGTIGVKAWVYKGDIEPAPRQVAQNAPGSGVQRPAAPPLPAPAPVVPAPVAAPSAPPAVGV	3065
rpsC_lf.cluster1299	2	Ga0577619_00038751_3175_3936	Ga0577619_00038751	1	MGQKVNPHGFRLGITTDFKSRWYADKLYKEYVAEDVAIRRMLQRGMERAGISKVEIERTRDRVRVDIHTARPGIVIGRRGAEADRIRGDLEKLTSKQIQLNILEVRNPETDAQLVAQGVAEQLSSRVSFRRAMRKAIQSAMKGGAKGIRVQCSGRLGGAEMSRSEFYREGRVPLHTLRADIDYGFYEARTTFGRIGVKVWIYRGEAPTSRAGREKQAAEAALRGAGQQRNARPGRDAQRRRRGPEPAAAEQEG	6837
rpsC_lf.cluster13	3	Ga0577615_0164008_172_1371	Ga0577615_0164008	1	MGQKIHPGGLRVGVIHDWKSNWYTGKKEFPAYILEDVKIREHIYRKLSHAGLSDILIRKDKQRITVDIYTARPGIVIGKSGVEVDALRRELHAITQKNVHININEIKRPELDAKLVAQSIAEQLSNRVAFRRAMKRALASAIRSGAAGVKIQCAGRLGGGEMSRSETYNEGRVPLHTIRADIDYGFVEARTSAGRIGVKVWINKGEIMPAGYEGVQQGDQRLGDQDTRRRRGGATEGLGASRESGRGRGPDREGLGPVKRRRGPGGGAGGGGGGRGPGGAGGGRGRGPGGAGGGGGGRGPGGPGGPGGPGGSGGGGGGRGRGPAPGSRPAGGGGGAGRVARPQENVEKPKTDDNAVSAEGREQPVIKPEVETTPKPVADAPDTTSNQDPSAKSDKDGES	2420
rpsC_lf.cluster130	1	Ga0577632_0001464_15432_16484	Ga0577632_0001464	1	MGQKVHPEALRVGYIHDWKSNWFNEKNFSDYLYEDVQIRSHIIGRLSHAGLSDITIRKNATEVEVNIHTARPGIVIGKSGSEVDQLRRDLHRITSKQVKVNILEIKRPELDARLVAQSIAEQLQNRVAFRRAMKRALTSAMRSGAKGVKVQVSGRLGGAEMARTEGYSDGRVPLHTLRADIDYGFHEARTTFGRIGVKCWINKGEIMPEGYTGADLTIMDEPAPQAPERGGRDGRGRGDGRGGRGGGPGGPGGRGGGPGGRGGGPGGRGGGPGGPGGRGGGPGGRGGGPGGRGGGPGGRGGGPGGGGGRGPRPGGGGGPGGGGGRGPRPGGGGGRGGQGGGGQSGGGITR	20123
rpsC_lf.cluster1300	8	Ga0577621_0408378_167_928	Ga0577621_0408378	1	MGQKVNPIGLRLGINRTWDSRWFADGADYGKLLHEDIKVRRALKKRLYQAGVSRITIERPHKKCRITIYAARPGVIIGKKGADIDKLRKDIAAMTDGEVHLNIVEIRKPETDAQLIAENIAQQLERRVAFRRAMKRSMQSAMRLGAKGVRINVSGRLGGAEIARMEWYREGRVPLHTLRADIDYGFTEAKTTYGIIGVKVWVFKGEVLEHDPMALDKRLAGESGPAGEGGGRDRAGDRPDRGPRRDRRDQANA	1098
rpsC_lf.cluster1301	2	Ga0577633_0330108_561_1322	Ga0577633_0330108	1	LSVTKYFIKDVSRRLEIDEHLALELKRAGYSHVELTKSPVGTRVVIYAAKPGMVIGRRGQSIRDLTKVLEDKFHIENPQLSVANIDVPEQDPKVVASQVASALQRGVHFRRAAYWALQRVMESQALGVEITIRGKLTTERSRFEKFKAGYLPRVGDPVLKSVKTAVADVQLKQGLFGINVRILPPQTSYIDKPIMLTPPAETTPPQAKPAKETEVVATPEAVTEVLVEAEPQAEVAVVGEDKEEEETGDSEKA	1773
rpsC_lf.cluster1302	1	Ga0480586_0088506_287_1048	Ga0480586_0088506	1	MGQKIHPIGFRLSVLRNWTSKWYANSKNFPGMLQEDVKVRDFLKQKLAHAAVGKIIIERPAKNAKITIFSARPGVVIGKKGEDIESLKAQLQKLLHVPVHINIEEIRKPELDAQLISDSIAQQLQKRIMFRRAMKRAITNAMRLGAQGIKIMSAGRLNGIEIARTEWYREGRVPLHTLRADIDYGFSEAKTTYGIIGIKVWVFKGEILTKHEQALAAPAATPESLVTDKPADRPAAKPAPKKRRTGVKHAAAS	1562
rpsC_lf.cluster1303	1	Ga0577619_01293559_305_1066	Ga0577619_01293559	1	MGQKVNPVGLRLGINRTWDSRWFASGPEYARLLHDDMRVRAALKKRLAQAGVSRIIIERPHKRCRVTIYAARPGVIIGKKGADIEKLRKDLSAMTEGEVHLNIVEIRKPETDAQLVAENIAQQLERRIAFRRAMKRSMQSAMRLGAKGVRVEVAGRLGGAEIARAESYHEGRVPRHTLRADIDYGFAEAQTTYGIIGVKAWIFKGEVLEHDPMALDKRLASESGPAGEGGGREPRGDRPDRAPRRDRREAANA	1135
rpsC_lf.cluster1304	3	Ga0577627_0545489_541_1302	Ga0577627_0545489	1	LSVTKYFVKDVSRRLEIDEHLALELKRAGYSHVELTKSPVGTRVVIYAAKPGMVIGRRGQSIRDLTKVLEDKFHIENPQLSVANIEVPEQDPKVVASQVASALQRGVHFRRAAYWAIQRVMESQALGVEITIRGKLTTERSRFEKFKAGYLPRVGDPVLKSVKRAVADVQLKQGLFGINVRILPPQTSYIDKPIMLTPPAETTPPPSKPAKETEVVATPEVVAEVLVEAEPQAEVTVVVEDKEEEETGDSEKA	1415
rpsC_lf.cluster1305	1	Ga0480455_01256621_284_1045	Ga0480455_01256621	1	MVYVTRPGLAIGRRGTGIKDLTDRVAKRFGFPNPQIAVSEVQSPELNPRIMAARIAQIVARGTAFRRAATWTMNTIMGAGAMGVEISVAGKLRSDRSHSEKYRMGIVPKSGETSTRIVREAGTDVLMKLGLYGINVKIAIKNAIPPIFELKEEAQTQEAAQPTPPPQVAPIPVATPVPQVPAKVEKEVLEAIEADETPKEAEALTEEVAPPAEEVAPPAEEVAPPNPEEPTPKEEKIVETKSEGAQTARPDAA	1059
rpsC_lf.cluster1306	2	Ga0577626_0544826_7_768	Ga0577626_0544826	1	MGQKVNPIGLRLGINRTWDSRWYAGKNEYGTLLHEDMKIRKELMTSLKQAAVSKIVIERPHKKCRVTVHSARPGVVIGKKGADIEKLRKSVAKLTDSDVVINIVEIRKPELDATLVAESIAQQLERRVAFRRAMKRAVQSAVRLGAQGIRINCSGRLGGAEIARMEWYREGRVPLHTLRADVDYGFTEAKTTYGIIGVKVWVFKGEVLDHDPMALDKRLAGESGPAGEGGGRDRSGDRPDRGPRRDRREQANA	1412
rpsC_lf.cluster1307	1	Ga0577630_0217192_871_1632	Ga0577630_0217192	1	MGQKIHPVGFRLSVLRNWSSKWYANSKNFPGMLQEDVKVRDFLKQKLAHAAVGRIIIERPAKNAKITIFSARPGVVIGKKGEDIESLKAQLQKLLHVPVHINIEEIRKPELDAQLISDSIAQQLQKRIMFRRAMKRAITNAMRLGAQGIKIMSAGRLNGIEIARTEWYREGRVPLHTLRADIDYGFSEAKTTYGIIGIKVWVFKGEILTKHEQALAAPAAQPESVVTDKPADKPAAKPAPKKRRTGVKHAATS	1645
rpsC_lf.cluster1308	2	Ga0480452_0012078_1047_1808	Ga0480452_0012078	1	LSVTKYFIKDVSRRLEIDEHLALELKRAGYSHVELTKSPVGTRVVIYAAKPGMVIGRRGQSIRDLTKVLEDKFHIENPQLSVANIDVPEQDPKVVASQVASALQRGVHFRRAAYWALQRVMESQALGVEITIRGKLTTERSRFEKFKAGYLPRVGDPVLKSVKTAVADVQLKQGLFGINVRILPPQTSYIDKPIMLTPPAETTPPQAKPAKETEVVATPEVVTEVLVEAEPQAAVAVVVEDKEEEETGDSEKA	5709
rpsC_lf.cluster1309	1	Ga0577638_0875084_8_769	Ga0577638_0875084	1	MITVTIHAAKPGIVIGKSGVKVEELRRTLEAMTGKRIRVTIQEIRQPEIDAFLVARSIADQLEKRVAFRRAMKQAVQRAQRFGAKGVRVQVSGRLGGSEMSRREWDRWGRVPLHTLRADIDYGQTEARTTYGVIGVKVWIYRGEFTPDGRSPEEVAAEQRQPDRRGPRATVRAEVPEAAVAEVAAPAEPAEIDYSHGGVFEPGDESGELKPRGQRTDGAEAAPPPPPAPPTRPAPTPPTPPSPPAGPTPRSEE	1292
rpsC_lf.cluster131	1	Ga0577639_0098480_1326_2378	Ga0577639_0098480	1	MGQKVHPGGMRVGVIHDWKSNWYTGKKEFPGYLIEDIKIREHITNKLSHAGLSDILIRKDKQRVTVDIYTARPGIVIGKSGVEVDALRKELHAITKKNVHININEIKRPELDAKLVAQSIAEQLQNRVSFRRAMKRALASGIRSGAKGVRIQCGGRLGGTEMSRSEAYSEGRVPLHTIRADIDYGFVEAKTTFGRIGVKVWINKGEIMPEGYGGLDTEKDVRLGEQDQARRRRANVEGLGASREGGRDRQRDREGLGPVRPGRKKTGQGRGSGRGQGRGGRPPAGRSRAGQQDNVERPRTDETATSAEGREQPPVEPTVETTPAPVADAPDTTTPKQQTEDPTKQEKADS	2565
rpsC_lf.cluster1310	5	Ga0577631_0000002_347394_348155	Ga0577631_0000002	1	LGQKVHPLGFRLGFVKTWNAKWYAGSKNYPILLKEDVAIRSGIRARLRDAAIARIEIERSTNQVTVTIHTAKPGVVIGKGGAKVEELRQVLGKTTGKTVKVNIFEIRYPELDAVLIAENVAQQLERRVSFRKVLKQTVLRSMKSGAKGVRVAVAGRLGGAEMSRREWEREGRVPLHTLRADIEFGRAIAKTTYGTIGVKAWVYKGDIEPAPRQVAQNTPGGSALRPVVPPPPPMPAPAPTPAATATPTPAVGV	383467
rpsC_lf.cluster1311	1	Ga0577634_0454253_1_762	Ga0577634_0454253	1	GNKLRITIRTSRPGIIIGRKGAEIEKLKSDLAKKTKREVFIDIQEVHRPELDAQLVSESIALQLEKRVAFRRAMRKAVDSALRFGCKGIKVRVSGRLNGAEIARSEWYLQGQLPLHTLRADIDYGFSQAYTTYGVIGVKVWVYKGEVLDGGRRDSMRNEGEPRRRRREEREPFREQRERRPVAAASPAPEPSGPATQAPPAEMPKPANAPIIPPLSVPVAPSWKQEQKTSEPSVTPAESAAPPVVDEKQEGGE	1602
rpsC_lf.cluster1312	1	soilwarming_unheated_45-60_052018_S4S9S14_219481_1	soilwarming_unheated_45-60_052018_S4S9S14_219481	1	MSVTKYFIKDVSRRLEIDEHLALELKRAGYSHVELTKSPVGTRVVIYAAKPGMVIGRRGQSIRDLTKVLEDKFHIENPQLSVANIDVPEQDPKVVASQVASALQRGVHFRRAAYWALQRVMESQALGVEITIRGKLTTERSRFEKFKAGYLPRVGDPVLKSVKTAVADVQLKQGLFGINVRILPPQTSYIDKPIMLTPPAETTPPPAKPAKETEVVATPEVVTEVLVEAEPQAEVTVVVEDKEEEETGDSEKA	1059
rpsC_lf.cluster1313	2	Ga0577633_0579230_54_815	Ga0577633_0579230	1	VGQKVHPLGFRLGFVKTWNAKWYAGSKNYPILLKEDVAIRSGIRARLRDAAISRIEIERSTNQVTVTIHTAKPGVVIGKGGAKVEELRQVLGKTTGKAVKVNIFEIRYPELDAALIAENVAQQLERRVSFRKVLKQTVLRSMKSGAKGVRVAVAGRLGGAEMSRREWEREGRVPLHTLRADIEFGRAIAKTTYGTIGVKAWVYKGDIEPAPRQVAQNAPGGSAARPVAPPAPAPAPPAPTPVAAPLAPPAVGV	1274
rpsC_lf.cluster1314	5	Ga0577627_0854273_279_1040	Ga0577627_0854273	1	MGQKVHPLGFRLGFVKTWNAKWYAGSKNYPILLKEDVTIRAAIRARLRDAAISRIDIERSTNQVTVTIHTAKPGVVIGKGGAKVEELRQVLGKTTGKTVKVNIFEIRYPELDAVLIAENVAQQLERRVSFRKVLKQTVLRSMKSGAKGVRVAVAGRLGGAEMSRREWEREGRVPLHTLRADIEFGRAIAKTTFGTIGVKAWIYKGDIEPAPRQVAQNAPGSSASRPAAPPAPAPAPAAPAPVAAPIAPPAVGV	1086
rpsC_lf.cluster1315	4	Ga0577631_0017660_371_1132	Ga0577631_0017660	1	VGQKVHPIGYRLGFTKTWNAKWFAEAKNYRILLKEDIAIRTTIRGRLRDAAIARIDIERSTNQVTVTIQTAKPGVVIGKGGAKVEELRQALGKATGKVVKVNIFEIRYPELDANLIAENVAQQLERRVSFRKVLKQTVSRSMKAGAKGVRVAVAGRLGGAEMSRREWEREGRVPLHTLRADIEFGRAIAKTTFGTIGVKAWVYRGDIEPAPRQVSQNAPAAAARPAVLGAPAAVGAAPAPVGAPVASGPVGTP	4736
rpsC_lf.cluster1316	1	Ga0577630_0498155_316_1074	Ga0577630_0498155	1	MGQKVHPESLRVGYIHDWKSNWFNERHFADYLEEDIRIREHIHNKLAHAGLSDITIRKDANEVEVNIHTARPGIVIGKSGSEVDALRRDLHRMTGKAIKVNILEIKRPELDAALVAQSIGEQLQNRVAFRRAMKRALTSAMRSGAKGVRVQVSGRLGGAEMARTEGYSDGRVPLHTLRADIDYGFYEARTTFGRIGVKCWINKGEIMPEGYSGADLTDVNAPLPGDRGGRDDRGRGRGDGRGRGGGGGGRGRG	1076
rpsC_lf.cluster1317	4	Ga0480588_0026616_2018_2779	Ga0480588_0026616	1	MGQKVNPVGLRLGINRTWDSRWFADGADYGRLLHEDIKVRRALKKRLYQAGVSRIIIERPHKKCRITIYAARPGVIIGKKGADIDKLRKDIAAMTEGEVHLNIVEIRKPETDAQLVAENIAQQLERRVAFRRAMKRSMQSAMRLGAKGVRINVAGRLGGAEIARMEWYREGRVPLHTLRADIDYGFTEAKTTYGIIGVKVWVFKGEVLEHDPMALDKRLGSESGPAGEGGGRDRSGDRPDRGPRRDRREQANA	3646
rpsC_lf.cluster1318	1	Ga0577615_0163163_1636_2397	Ga0577615_0163163	1	VGQKVHPVGYRLGFTKTWNAKWFAEAKNYRILLKEDISIRSTIRGRLRDAAIARIDIERSTNQVTVTIQTAKPGVVIGKGGAKVEELRQALGKTTGKVVKVNIFEIRYPELDANLIAENVAQQLERRVSFRKVLKQTVSRSMKAGAKGVRVAVAGRLGGAEMSRREWEREGRVPLHTLRADIEFGRAIAKTTYGTIGVKAWVYRGDIAPAPRQVSQNAPAAAARPAVLGAPVGAGGPAGPGIVPVAGGPVGTP	2427
rpsC_lf.cluster1319	2	Ga0577636_0014223_1302_2063	Ga0577636_0014223	1	VGQKVNPHGFRLGITTDFKSRWYADKLYKEYVAEDVAIRRMLQRGMERAGISKVEIERTRDRVRVDIHTARPGIVIGRRGAEADRIRGDLEKLTSKQIQLNILEVKNPEIDAQLVAQGVAEQLSSRVSFRRAMRKAIQSAMKGGAKGIRVQCSGRLGGAEMSRSEFYREGRVPLHTLRADIDYGFYEARTTFGRIGVKVWIYKGEAPTSRAGREAQAAALRAAAQQRPQRPSREPQRRRRAPEAAGAGAGEEG	3508
rpsC_lf.cluster132	3	Ga0577627_0704907_3_1052	Ga0577627_0704907	1	LIEDIKIREHITNKLSHAGLSDILIRKDKQRVTVDIYTARPGIVIGKSGVEVDALRKELHAITKKNVHININEIKRPELDAKLVAQSIAEQLQNRVSFRRAMKRALASGIRSGAKGVRIQCGGRLGGTEMSRSEAYSEGRVPLHTIRADIDYGFVEAKTTFGRIGVKVWINKGEIMPEGYGGLDTEKDVRLGEQDQARRRRANVEGLGASREGGRDRQRDREGLGPVRPKRRGGGQGRGSGGQGQRTGQGRGGGRPAPRSRAGQQDNVERPRTGTDEVAKPAEPRDRAAQPPVRESGPAEGARGNPEVPTTETDASTVEATPAPVADAPDTTAPTQEPNDTTKPEKADQ	1218
rpsC_lf.cluster1320	6	Ga0577630_0336410_201_962	Ga0577630_0336410	1	MGQKVHPLGFRLGFVKTWNAKWYAGSKNYPILLKEDVAIRAGIRARLRDAAISRIEIERSTNQVTVTIHTAKPGVVIGKGGAKVEELRQVLGKTTGKAVKVNIFEIRYPELDAMLIAENVAQQLERRVSFRKVLKQTVLRSMKSGAKGVRVAVAGRLGGAEMSRREWEREGRVPLHTMRADIEFGRAIAKTTYGTIGVKAWVYKGDIEPAPRQVAQNTPGGSALRPVVPPPPPMPAPAPTPAATATPTPAVGV	1318
rpsC_lf.cluster1321	1	Ga0577643_00640857_479_1240	Ga0577643_00640857	1	LSVTKYFIKDVSRRLEIDEHLALELKRAGYSHVELTKSPVGTRVVIYAAKPGMVIGRRGQSIRDLTKVLEDKFHIENPQLSVANIDVPEQDPKVVASQVASALQRGVHFRRAAYWALQRVMESQALGVEITIRGKLTTERSRFEKFKAGYLPRVGDPVLKSVKTAVADVQLKQGLFGINVRILPPQTSYIDKPIMLTPPADTTPPPAKPAKETEVVATPEVEAEVLVEAAPQAEVAVVVEDKEEEETGDSEKA	1377
rpsC_lf.cluster1322	4	Ga0577619_00068808_3362_4123	Ga0577619_00068808	1	LSVTKYFVKDVSRRLEIDEHLALELKRAGYSHVELTKSPVGTRVVIYAAKPGMVIGRRGQSIRDLTKVLEEKFHIENPQLSVANIEVPEQDPKVVASQVASALQRGVHFRRAAYWALQRVMESQALGVEITIRGKLTTERSRFEKFKAGYLPRVGDPVLKSVKTAVADVQLKQGLFGINVRILPPQTSYIDKPIMLTPPAETTPPQVKPAKETEPVAAPEIVAEVMVEAEPQAEVAVVVEDKEEEETGDSEKA	5329
rpsC_lf.cluster1323	2	Ga0577643_00633955_3_764	Ga0577643_00633955	1	IKVREFLKRKLAHASVGRVLIERPAKDARITIFSARPGVVIGKKGEEIEALKAELRRLMGVNQVHVNIEEIRKPEVDAQLIADSIAQQLEKRIMFRRAMKRAMQNAMRLGAQGIKIMSSGRLNGIEIARTEWYREGRVPLHTLRADIDYGLGEAKTSFGVIGIKVWVYKGEVMPKGEAQAALPSAAPAAQPETPAAPRRAKKPVPKPGARRPSGRPRPEGERKAAKKPDAPAPKTTVKRPKKVLKEEGGETKE	1385
rpsC_lf.cluster1324	1	Ga0577639_0051544_2618_3379	Ga0577639_0051544	1	DRPGNKLRITIRTSRPGIIIGRKGAEIEKLKGDLAKKTKREIFIDIQEVHRPELDAQLVSESIALQLEKRVAFRRAMRKSVDSALRFGCKGIKVRVSGRLNGAEIARSEWYLQGQLPLHTLRADVDYGFSQAYTTYGVIGIKVWIYKGEVIEAGNRSRNTLRNEGEPRRRRRDDRPDRDRDRDRRPPMQQQAPAPEATGPVVQQAPGELPKPAASAPVVPPLSAPTVPSWKQEGANRPAAGETPGGEEGKPNE	3380
rpsC_lf.cluster1325	2	Ga0577625_0191962_691_1449	Ga0577625_0191962	1	MGQKVHPLGFRLGFVKTWNAKWYAGSKNYPVLLKEDVTIRAAIRARLRDAAISRIEIERSTNQVTVTIHTAKPGVVIGKGGAKVEELRQVLGKTTGKAVKVNIFEIRYPELDAVLIAENVAQQLERRVSFRKVLKQTVLRSMKSGAKGVRVAVAGRLGGAEMSRREWEREGRVPLHTLRADIEFGRAIAKTTYGTIGVKAWVYKGDIEPAPRQVAQNAPGGSTSRPVAPPAPPPPPSPVPAAAPSAPPAVGV	2102
rpsC_lf.cluster1326	1	Ga0577632_0142284_3_758	Ga0577632_0142284	1	MGQKVHPNAFRLGIYKPWQARWYADKDYTEMLLEDMKMRRLILNRLRNAGISKVETERSANQATVVIWTAKPGIVIGKGGASVDQLRDDLEKMTGKKVRVTIQEIKHPELDAMLVAQNVAAQLERRIAFRRAVKQSVLRTMRAGAKGVKIMVSGRLGGAEMSRREWDRDGRVPLHTLKANIDFGQTEARTTFGRIGVSVWVYLGDFDLTPARRPSTRSPPASCSTSRASWRRPRPTARPPRPPPPLQPPSPK	2433
rpsC_lf.cluster1327	3	Ga0577618_0035639_4566_5324	Ga0577618_0035639	1	MGQKVHPLGFRLGFVKTWNAKWYAGSKNYPILLKEDLTIRAAIRARLRDAAISRIDIERSTNQVTVTIHTAKPGVVIGKGGAKVEELRQVLGKTTGKAVKVNIFEIRYPELDAMLIAENVAQQLERRVSFRKVLKQTVLRSMKSGAKGVRVAVAGRLGGAEMSRREWEREGRVPLHTLRADIEFGRAIAKTTFGTIGVKAWVYKGDIEPAPRQVAQNAPGSGAQRPLAPLAPAPVPAPAPVAAPSTPPAVGV	5619
rpsC_lf.cluster1328	2	Ga0577616_0088141_493_1251	Ga0577616_0088141	1	MGQKVNPLGIRLGITRDWTSKWYAGKKQFPQHVYTDFRVRGFLRSRLAEASVSRIQIERAAKKVNITIQTARPGIVIGKKGEDIEKLRSETAKLLGMPMSDVRLNIAEIRKPELDAQLVADSIAQQIEKRVMFRRAMKRAVMSTMRSGALGVKVRVSGRLNGGEIARTEQYREGRIPLHTFRADIDYGLSESHTTYGVIGVKVWIFKGEVFDKVEIEQAAAEGEAAQGAGAPAPAPVAAPPAAPAAEAPAQA	2400
rpsC_lf.cluster1329	1	Ga0577631_0061672_1_756	Ga0577631_0061672	1	MGQKVHPHGFRLGISTDWKSRWYADKLYKDYIAEDVKIRRMMAKGLERAGISKVDIERTRDRVRVDIHTARPGIVIGRKGAEADRIRGELEKLTGKQVQLNILEVKNPESDAQLVAQGVAEQLSSRVSFRRAMRKAMQQAMKNPLVRGIRVQVSGRLGGAEMSRTEFYREGRVPLHTLRANIEYGFFEARTTFGRIGVKVWIYKGDAVPGREAPAEQAPSRGRRERGDRPERPRRGRSGSSGTTAGGTEAGR	2781
rpsC_lf.cluster133	1	Ga0577643_00029626_4727_5776	Ga0577643_00029626	1	VGRKVHPNGFRLGVYRGWEANWFATDKDYLKLLHEDMEMRRLIMKRLRNAGIARIETERSSNAQLTVTIHTAKPGIVIGKGGASVDQLREDLEKRFQNRVRISINEIKQPEMDAQLVAENIASQIERRISYRRAMKQSILRTMRAGAKGVRIAAGGRLRGSEMARREWDREGRVPLHTLRADIDFGRATARTTFGMIGVKCWIYKGLVPGRKRGGDLEAEVVPQPVDGGVPAPAAPAPAPAPAEPAAAAAQAATVAAAPVKAPPVTPEAAAPVEAPPVSAQAAAPVEAPPVTAEAAAQVEAPPVTAEAAAAAAEAPAAPTAKPAPKAPRKRTTKPKAEPASKEDADAPA	5782
rpsC_lf.cluster1330	4	Ga0577625_0025635_2896_3654	Ga0577625_0025635	1	VGQKVHPVGYRLGFTKTWNAKWFAEAKNYRILLKEDIAIRSTIRGRLRDAAIARIDIERSTNQVTVTIQTAKPGVVIGKGGAKVEELRQALGKATGKVVKVNIFEIRYPELDANLIAENVAQQLERRVSFRKVLKQTVSRSMKAGAKGVRVAVAGRLGGAEMSRREWEREGRVPLHTLRADIEFGRAIAKTTFGTIGVKAWVYRGDIEPAPRQVSQNAPAAAARPAVLGAPQTSPAPAAPVAPVTVPTGPVA	5874
rpsC_lf.cluster1331	1	Ga0577625_0490722_4_762	Ga0577625_0490722	1	MGQKVNPIGLRLGVNRTWDSRWFADGGDYGRLLHQDIAVRKALKKRLYQAGVSRIIIERPHKKCRVTIYAARPGVIIGKKGGDIDKLRKDLSAMTEGEVFLNIVEVRKPEVDAQLIAESIAQQLERRIAFRRAMKRSMQSAMRLGAKGVRINVSGRLGGAEIARMEWYREGRVPLHTLRADIDYGFTEAKTTYGIIGVKVWVFKGEVLEHDPMAQDKRWALEASGPGGEDSRRDRDRGDRRPRRDRPSETPA	1277
rpsC_lf.cluster1332	2	Ga0577641_0551907_396_1154	Ga0577641_0551907	1	MGQKVNPLGIRLGITRDWTSKWYAGKKQFPQHVYTDWRVRGFLRSRLAEASVSRVHIERAAKKVNITIQTARPGIVIGKKGEDIEKLRLETAKLLGMTVGDVRLNIAEIRKPELDAQLVADSIAQQIEKRVMFRRAMKRAVMSTMRSGALGVKVRVSGRLNGGEIARTEQYREGRIPLHTFRADIDYGLSESHTTYGVIGVKVWIFKGEVFDKAQIEQAAAEGEAAPAAGTPAAQAPPPPPAAPPEATQAGA	1173
rpsC_lf.cluster1333	2	Ga0577627_0667897_413_1171	Ga0577627_0667897	1	MGQKVNPLGIRLGITRDWTSKWYAGKKQFPQHVYTDFRVRRFLRSRLAEASVSRIQIERAAKKVNITIQTARPGIVIGKKGEDIEKLRLETAKLLGMPIGDVRLNIAEIRKPELDAQLVADSIAQQIEKRVMFRRAMKRAVMSTMRSGALGVKVRVSGRLNGGEIARTEQYREGRIPLHTFRADIDYGLSESHTTYGVIGVKVWIFKGEVFDKAQIEQAAAEGEASQGAAAPAQAPAPAVTAVPPAEATAQA	1257
rpsC_lf.cluster1334	2	Ga0577635_0337401_578_1336	Ga0577635_0337401	1	MGQKVHPLGFRLGFVKTWNAKWYAGSKNYPVLLKEDVTIRSAIRARLRDAAISRIEIERSTNQVTVTIHTAKPGVVIGKGGAKVEELRQVLGKTTGKAVKVNIFEIRYPELDAVLIAENVAQQLERRVSFRKVLKQTVLRSMKSGAKGVRVAVAGRLGGAEMSRREWEREGRVPLHTLRADIEFGRAIAKTTYGTIGVKAWVYKGDIEPAPRQVSQNAPGGSASRPIAPLAPPPPPPPVPAAAPSAPPAVGV	1342
rpsC_lf.cluster1335	1	Ga0577622_0032791_625_1383	Ga0577622_0032791	1	MGQKVNPLGIRLGITRDWTSKWYAGKKQFPQHVYTDWRVRGFLRSRLAEASVSRVHIERAAKKVNITIQTARPGIVIGKKGEDIEKLRLETAKLLGMTVGDVRLNIAEIRKPELDAQLVADSIAQQIEKRVMFRRAMKRAVMSTMRSGALGVKVRVSGRLNGGEIARTEQYREGRIPLHTFRADIDYGLSESHTTYGVIGVKVWIFKGEVFDKAQIEQAAAEGEAAPAAGTPAAQAPPPPPAAPAADATAQA	3701
rpsC_lf.cluster1336	1	Ga0577639_0482975_455_1210	Ga0577639_0482975	1	VFRPWEANWFANPKDYTKMLHEDLEMRRVILARLRNAGIAKIETERSSNAQLTVTIHTAKPGIVIGKGGASVDQLREDLEKRFGNRVRISIQEIKQPELDAQLVAENIASQIERRISYKRAMKQAILRTMRSGAKGVRIYCGGRLRGAEMARREWDREGRVPLHTLRANIDFGRATANTTFGAIGVKCWIYKDVAVPLKKLPAAADGAPIADQIAPQPEIPEIVADQLVPEKIDTALLETANTPAITAAPKR	1212
rpsC_lf.cluster1337	5	Ga0577641_0515588_2_760	Ga0577641_0515588	1	VGQKVHPVGYRLGFTKTWNAKWFAEAKNYRILLKEDIAIRTTIRGRLRDAAIARIDIERSTNQVTVTIQTAKPGVVIGKGGAKVEELRQALGKATGKVVKVNIFEIRYPELDANLIAENVAQQLERRVSFRKVLKQTVSRSMKAGAKGVRVAVAGRLGGAEMSRREWEREGRVPLHTLRADIEFGRAIAKTTFGTIGVKAWIYRGDIEPAPRQVSQNAPAAAARPAALGAPAAVGAPVPVGAPVASGPVGTP	1218
rpsC_lf.cluster1338	4	Ga0577632_0067579_710_1468	Ga0577632_0067579	1	MGQKVHPLGFRLGFVKTWNAKWYAGSKNYPILLKEDVTIRSAIRARLRDAAISRIDIERSTNQVTVTIHTAKPGVVIGKGGAKVEELRQVLGKTTGKAVKVNIFEIRYPELDAVLIAENVAQQLERRVSFRKVLKQTVLRSMKSGAKGVRVAVAGRLGGAEMSRREWEREGRVPLHTLRADIEFGRAIAKTTYGTIGVKAWVYKGDIEPAPRQVAQNAPGGSAPRPVGPPAPPPPPMPSPAAAPSAPPAVGV	3549
rpsC_lf.cluster1339	1	soilwarming_unheated_30-45_052018_S3S8S13_171223_2	soilwarming_unheated_30-45_052018_S3S8S13_171223	1	MGQKVNPLGIRLGITRDWTSKWYAGKKQFPQHVYTDFRVRGFLRSRLAEASVSRIQIERAAKKVNITIQTARPGIVIGKKGEDIEKLRQETAKLLGMTVGDVRLNIAEIRKPELDAQLVADSIAQQIEKRVMFRRAMKRAVMSTMRSGALGVKVRVSGRLNGGEIARTEQYREGRIPLHTFRADIDYGLSESHTTYGVIGVKVWIFKGEVFDKAQIEQAAAEGEASQGAAAPAQAPAPAVTAVPPAEATAQA	1192
rpsC_lf.cluster134	1	Ga0577634_0488404_183_1232	Ga0577634_0488404	1	MGQKVNPVGFRLGIYRNWDARWYADKDYTKLLHEDLAMRRLITGRLRNAGLARIETERSANQLTIIIQTAKPGIVIGKQGASVDALRDELERISGKKVRVTIHEIKSPEVDAKLVAESVASQLEKRIAFRRAIKQSIMRTMRAGAKGVKIQVSGRLGGSEMSRREWDRDGRVPLHTLRANIDYGQAEARTTFGRIGVTVWIYKGDFVTATGEPILPGGDGRGREEGGDGAERPRRAPAARPEPARAAAPRAAAVAEPEVVAEPARVEPEVAVEEPEVEAAIDTTEADVDVDIDIADVDIPEIPGVDIPETEPEGTLKRAPARRKPATPRKPGAAPAKGRVADEPEVEEE	1535
rpsC_lf.cluster1340	2	Ga0577626_0031651_808_1566	Ga0577626_0031651	1	MGQKIHPTGFRLALNKNWASRWYANNKNFPGMLLEDVKVRDFLKEKLGHAAVSRVVIERPAKNARITIFSARPGVVIGKKGEDIESLKGQLQRMLGVPVHVNIEEVRKPELDAQLISDSIAQQLQKRIMFRRAMKRAITNAMRLGAQGIKIMSAGRLNGIEIARTEWYREGRVPLHTLRADIDYGFAEAKTTYGVIGIKVWVFKGEIMAKNEQPALLGAIGAPTPEPEQPPARKARKTPARTGAKRATASQT	6469
rpsC_lf.cluster1341	2	soilwarming_3_heated_45-60_052018_S29_15443_2	soilwarming_3_heated_45-60_052018_S29_15443	1	MGQKVNPIGLRLGINRTWDSRWFADGNDYGRLLHEDIKVRRELKKRLNQAGVSRIIIERPHKKCRVTIYAARPGVIIGKKGADIDKLRKDLSEMTEGEVHLNIVEIRKPETDAQLVAENIAQQLERRVAFRRAMKRSIQSTMRLGAKGIRINVSGRLGGAEIARMEWYKEGRVPLHTLRADMDYGFAEAKTTYGIIGVKTWIFKGEVLEHDPMAQDKRLATESGPAGEGGGRSDRGDRGDRGDRGGRRDRAG	1555
rpsC_lf.cluster1342	12	soilwarming_unheated_10-30_052018_S2S7S12_43044_2	soilwarming_unheated_10-30_052018_S2S7S12_43044	1	MGQKVHPLGFRLGFVKTWNAKWYAGSKNYPILLKEDVTIRSAIRARLRDAAISRIDIERSTNQVTVTIHTAKPGVVIGKGGAKVEELRQVLGKTTGKAVKVNIFEIRYPELDAVLIAENVAQQLERRVSFRKVLKQTVLRSMKSGAKGVRVAVAGRLGGAEMSRREWEREGRVPLHTLRADIEFGRAIAKTTYGTIGVKAWVYKGDIEPAPRQVAQNAPGGSAARPVAPPAPPLPPIPAPVAAPSAPPAVGV	1639
rpsC_lf.cluster1343	8	Ga0577635_0036005_1273_2031	Ga0577635_0036005	1	VGQKVHPIGYRLGFTKTWNAKWFAEAKNYRILLKEDIAIRNTIRGRLRDAAIARIDIERSTNQVTVTIQTAKPGVVIGKGGAKVEELRQALGKATGKVVKVNIFEIRYPELDANLIAENVAQQLERRVSFRKVLKQTVSRSMKAGAKGVRVAVAGRLGGAEMSRREWEREGRVPLHTLRADIEFGRAIAKTTFGTIGVKAWVYRGDIEPAPRQVSQNAPAAALRPAVLGAPAAVGAPAAVVAPVAGGPVGTP	3742
rpsC_lf.cluster1344	1	Ga0480449_0239230_87_845	Ga0480449_0239230	1	MGQKVNPLGIRLGITRDWTSKWYAGKKQFPQHVYTDWRVRGFLRSRLAEASVSRVHIERAAKKVNITIQTARPGIVIGKKGEDIEKLRLETAKLLGMTVGDVRLNIAEIRKPELDAQLVADSIAQQIEKRVMFRRAMKRAVMSTMRSGALGVKVRVSGRLNGGEIARTEQYREGRIPLHTFRADIDYGLSESHTTYGVIGVKVWIFKGEVFDKAQIEQAAAEGEAAPAAATPAAQAPPPPPAAPADATQAGA	1430
rpsC_lf.cluster1345	2	Ga0577641_0008958_3817_4575	Ga0577641_0008958	1	MGQKVHPLGFRLGFVKTWNAKWYAGSKNYPILLKEDVTIRAAIRARLRDAAISRIEIERSTNQVTVTIHTAKPGVVIGKGGAKVEELRQVLGKTTGKAVKVNIFEIRYPELDAMLIAENVAQQLERRVSFRKVLKQTVLRSMKSGAKGVRVAVAGRLGGAEMSRREWEREGRVPLHTLRADIEFGRAIAKTTFGTIGVKAWVYKGDIEPAPRQVAQNAPGSGAQRPSAPPAPAPVPAPAPVAVPSTPPAVGV	7498
rpsC_lf.cluster1346	1	Ga0577626_0157931_2088_2843	Ga0577626_0157931	1	VGNKISPKALRVGYIQDWESRWYAPKDMPDLIEEDFRIRQYLKERFRMAAVSKVTIERTGKYVRINLHTARPGVIIGKKGADIEELKKEIQEMTRSEATINVVEVKRPELDAQLVAEGVAFQLEKQIAFRRAMKRAVERTMQAGAGGIKIMVAGRLGGAEIARTEWTMEGRVPLHTFRADIDYGFTEAHITMGRIGVKCWIFKKEFFMKSDKDLIKEAEVLTPVATVPAAAPAQAPAAKAEEIPAVKAPEAT	2843
rpsC_lf.cluster1347	1	Ga0577643_00039809_3010_3768	Ga0577643_00039809	1	MGQKVHPLGFRLGFVKTWNAKWYAGSKNYPILLKEDVTIRAAIRARLRDAAISRIEIERSTNQVTVTIHTAKPGVVIGKGGAKVEELRQVLGKTTGKAVKVNIFEIRYPELDAMLIAENVAQQLERRVSFRKVLKQTVLRSMKSGAKGVRVAVAGRLGGAEMSRREWEREGRVPLHTLRADIEFGRAIAKTTFGTIGVKAWVYKGDIEPAPRQVAQNAPGSGAQRPLAPPAPAAVPAPAPVAAPSTPPAVGV	5121
rpsC_lf.cluster1348	1	Ga0577630_0037707_2259_3017	Ga0577630_0037707	1	MGQKVNPLGIRLGITRDWTSKWYAGKKQFPQHVYTDWRVRGFLRSRLAEASVSRVHIERAAKKVNITIQTARPGIVIGKKGEDIEKLRLETAKLLGMTVGDVRLNIAEIRKPELDAQLVADSIAQQIEKRVMFRRAMKRAVMSTMRSGALGVKVRVSGRLNGGEIARTEQYREGRIPLHTFRADIDYGLSESHTTYGVIGVKVWIFKGEVFDKAQIEQAAAEGEAAQGAGTPPAPAPVVAPPAPPADAPAQA	3769
rpsC_lf.cluster1349	17	Ga0480449_0401478_2_760	Ga0480449_0401478	1	RARREVRDDAVNNTCHQESEGVTVGQKVHPIGFRLGFNKTWRSRWYSDRDYAKLLHEDINLRQTLKKRFAHAGVSKIETERAANKLKIDIYTSRPGIIIGRKGTEVEKLKQEIQKRTNREVFINIQEIQKPELDAQLISESVAMQLEKRVAFRRAMRKAVESALRFGARGIKVRVSGRLNGAEIARSEWYLHGQLPLQTLRADIDYGFAEASTTYGQIGIKVWLYKGERLVPLRGREEEYRERAPRRPAARA	1066
rpsC_lf.cluster135	2	Ga0577633_0054274_1099_2145	Ga0577633_0054274	1	VGHKVHPNAFRLGVYRPWEANWFAQKKDYTKLLHEDLDMRRLILRRLRNAGIAKIETERSSNAQMTVTIHTAKPGIVIGKGGSSVDQLREDLEKRFGNRVRISIQEIKQPELDAQLVAENIASQIERRISYRRAMKQSILRTMRSGAKGVRVALGGRLRGSEMARREWDREGRVPLHTLRADILFGRATAHTTFGTTGVKVWIYKDNFVIAPRGGAVPGEEVAPQPALPQPRPETPEGVGAEASAPVPTAPAPTAAAPTAAAPTAPAPTAAAPTAAAPTVAAPTAAAPSVADVTPVDPGSPVVAEAVVAEQVQAEETVKAPRKRATKKAETTEPVPEAPATEEGDASS	4618
rpsC_lf.cluster1350	3	Ga0577638_0599026_22_780	Ga0577638_0599026	1	MGQKVNPLGIRLGITRDWTSKWYAGKKQFPQHVYTDWRVRGFLRSRLAEASVSRVHIERAAKKVNITIQTARPGIVIGKKGEDIEKLRLETAKLLGMSVGDVRLNIAEIRKPELDAQLVADSIAQQIEKRVMFRRAMKRAVMSTMRSGALGVKVRVSGRLNGGEIARTEQYREGRIPLHTFRADIDYGLSESHTTYGVIGVKVWIFKGEVFDKAQLEQAPAEGEAAPGPGAPAQAPAPAVTAVPPADATAQA	1625
rpsC_lf.cluster1351	2	Ga0577641_0316726_2_757	Ga0577641_0316726	1	LSVTKYFVKDVSRRLEIDEHLALELKRAGYSHVELTKSPVGTRVVIYAAKPGMVIGRRGQSIRDLTKVLEEKFHIENPQLSVANIEVPEQDPKVVASQVASALQRGVHFRRAAYWAIQRVMESQALGVEITIRGKLTTERSRFEKFKAGYLPRVGDPVLKSVKTAVADVQLKQGLFGINVRILPPQTSYIDKPIMLTPPADTTPPPAKPAKETEVVATPEIVTEVMVDAEPPAEVAVVVEDKEEEETGDSEK	1577
rpsC_lf.cluster1352	2	Ga0577620_0215070_147_905	Ga0577620_0215070	1	VGQKVHPVGYRLGFTKTWNAKWFAEAKNYRILLKEDIAIRSTIRGRLRDAAIARIDIERSTNQVTVTIQTAKPGVVIGKGGAKVEELRQALGKATGKVVKVNIFEIRYPELDANLIAENVAQQLERRVSFRKVLKQTVSRSMKAGAKGVRVAVAGRLGGAEMSRREWEREGRVPLHTLRADIEFGRAIAKTTFGTIGVKAWVYRGDIEPAPRQVSQNAPAAAARPAALGAPQSAPAPAAPIAPVTAPTGPVA	1339
rpsC_lf.cluster1353	1	Ga0577616_0427406_2_757	Ga0577616_0427406	1	PGIVIGKSGVKVEELRRTLEAMTGKRIRVTIQEIRQPEIDAFLVARSIADQLEKRVAFRRAMKQAVQRAQRFGAKGVRVQVSGRLGGSEMSRREWDRWGRVPLHTLRADIDFGLTEAHTTYGIIGVKVWVYRGDFTPDGRSPEEVAAEQRQPDRRGPRATVRAEVPEAAAPEAVAAAVPADVDYSRGGVFDPGEETGEIRPRGQGQAPEGASTPPAAAQPPVAPTPPTRPAPTPPRAPTPPAPPAAPKAEE	1217
rpsC_lf.cluster1354	7	Ga0577639_0183467_1050_1805	Ga0577639_0183467	1	MGQKVNPLGIRLGITRDWTSKWYAGKKQFPQHVYTDWRVRGFLRSRLAEASVSRVHIERAAKKVNITIQTARPGIVIGKKGEDIEKLRQETAKLLGMTVGDVRLNIAEIRKPELDAQLVADSIAQQIEKRVMFRRAMKRAVMSTMRSGALGVKVRVSGRLNGGEIARTEQYREGRIPLHTFRADIDYGLSESHTTYGVIGVKVWIFKGEVFDKAQIEQAAAEGEAAQGAPAPAPAVAPAAPAASAEATAQA	1938
rpsC_lf.cluster1355	5	Ga0577639_0036599_701_1456	Ga0577639_0036599	1	MGQKIHPTGFRLALNKNWASKWYANNKNFSGMLLEDVKVRAFLKEKLGHAAVSRVVIERPAKNARITIFSARPGVVIGKKGEDIESLKGQLQRMLGVPVHVNIEEVRKPELDAQLISDSIAQQLQKRIMFRRAMKRAITNAMRLGAQGIKIMSAGRLNGIEIARTEWYREGRVPLHTLRADIDYGFSEAKTTYGVIGIKVWVFKGEILAKNEQPSLGAIGAPAIEPEQPPARKGRKTPARTGAKRATASQT	3892
rpsC_lf.cluster1356	9	Ga0480455_00181226_1918_2673	Ga0480455_00181226	1	VGQKVNPHGFRLGITTDFKSRWYADKLYKEYVAEDVAIRRMLQRGMERAGISKVEIERTRDRVRVDIHTARPGIVIGRRGAEADRIRGDLEKLTAKQIQLNILEVKNPEIDAQLVAQGVAEQLSSRVSFRRAMRKAIQSAMKGGAKGIRVQCSGRLGGAEMSRSEFYREGRVPLHTLRADIDYGFYEARTTFGRIGVKVWIYKGEAPTSRAGREAQQAALRAAAQQRPQRPRDAQRPRRRSPDGASAGEEG	2902
rpsC_lf.cluster1357	1	Ga0480478_018575_344_1099	Ga0480478_018575	1	VGQKVNPHGFRLGITTDFKSTWYADKLYKEYVAEDVAIRRLLQRGMERAGISKVEIQRTRDRVRVDIHTARPGIVIGRRGAEADRIRGDLEKLTAKQIQLNILEVKNPEIDAQLVAQGVAEQLSSRVSFRRAMRKAIQSAMKGGAKGIRVQCSGRLGGAEMSRSEFYREGRVPLHTLRADIDYGFYEARTTFGRIGVKVWIYKGEAPTSRAGREAQQAALRAAAQQRPQRPRDAQRPRRRSPEGASAGEEG	2036
rpsC_lf.cluster1358	1	Ga0577632_0545142_347_1102	Ga0577632_0545142	1	MGTRVTLLAERPGLVIGRKGGAIKTLTEAVERQFKFDNPQIEVQEVAAPALNAQIMAEKLANALERGWHFRRAGHSTVRRIMEAGAKGCLVVIAGKLTGQRHRTEKFKAGHIKYCGEPRHLWMAHGFAAAKLKPGIIGVTVEIMDPRAKLPDEIEIKQPSAEYIEAAAQAAAAKLVAPVEPLEETPDLPPLAIEAEDVETEPELVIPTVESEATKKVRKSRVGAKKLKKVAKEVKQLGVEADVEVEGGDEA	1134
rpsC_lf.cluster1359	5	Ga0577622_0005323_4144_4899	Ga0577622_0005323	1	VGQKIHPIGLRLGIIKDWESKWYAEKNFADLIQEDQALRRHIKKKLGRAGISRIEIERTANRVRITIHSARPGIIIGRGGTGIDALKKELDSLTGKQIQLNVQEIRRAELEATLVAQNVASQLERRVAYRRAMKQAVARTLRSGAKGIRISCAGRLAGAEIARYEWYRDGRVPLQTLRADIDFGVAEALTTYGRIGVKVWIYRGDVLPERRRPGELRGRPGETVVLPSRMPRVTVQRRPEANVDAQEGEVS	7812
rpsC_lf.cluster136	2	Ga0577643_00355428_147_1193	Ga0577643_00355428	1	MGQKVHPHGFRLGYIYDWNSKWYADRNYTEQLHGDLAIRGAIKKMLPDAGIARVEIERNANQITVSVHTARPGIVIGRGGQRVDELRTSLEKLSGNKVRVNINEIRVPEIEAPLVARAVAEQIERRVAHRRAIKQAALRAMQRGAKGVRIRISGRLGGSDMSRTDQERQGRVPLHTLRADVDYGTSEAHTTLGQIGVKVWIYKGDKQIERAHRRKETEAATEEEGQTPASVVAAAVEEAAAETPATEALAETAAQEPIAEAAAPEAVAETHISEAVVEKPAPAVAERAASKRALRAAPKAARKASSKVAAVKPAPKAAAEKPAPKAAAEEPAAEAETPATEETTDASA	1874
rpsC_lf.cluster1360	1	Ga0577618_0449436_20_775	Ga0577618_0449436	1	MITVTIHAAKPGIVIGKSGVKVEELRRTLEAMTGKRIRVTIQEIRQPEIDAFLVARSIADQLEKRVAFRRAMKQAVQRAQRFGAKGVRVQVSGRLGGSEMSRREWDRWGRVPLHTLRADIDYGQTEAHTTYGIIGVKVWIYRGDFTPDGRSPEEVAAEQRQPDRRGPRATVRAEVPEAAAPEAAPPAVPAEIDYSRGGVFDPGEESGEIRPRGAREGEAAPPAAPQAPTPPVRPAPTPPPPPTPPQARTEE	1522
rpsC_lf.cluster1361	2	Ga0577618_0004230_12070_12825	Ga0577618_0004230	1	VGQKVNPHGFRLGITTDFKSRWYADKLYKEYVAEDVAIRRMLQRGMERAGISKVEIERTRDRVRVDIHTARPGIVIGRRGAEADRIRGDLEKLTAKQIQLNILEVKNPETDAQLVAQGVAEQLSSRVSFRRAMRKAIQSAMKGGAKGIRVQCSGRLGGAEMSRSEFYREGRVPLHTLRADIDYGFYEARTTFGRIGVKVWIYKGEAPTSRAGREAQQAALRAAAQQRPQRPRDAQRPRRRSPEGSSAGEEG	13868
rpsC_lf.cluster1362	1	Ga0577638_0858614_3_755	Ga0577638_0858614	1	MGQKVNPYGFRLGITTDWKSRWFNDREYQSLVIEDWKIRNYLMTELERAAVSRVEVERTRDRLRVEVFTARPGIVIGRRGAEADRLREGLARITGNVKVQLNITEIKQPELDAALIAQGIADQVSARVNFRRAMKRAVQTVQKAGAQGIRVQCAGRLGGSEMSRKEFYREGRVPLHTLRADIDYGLREAKTTYGRIGVKVWIYKGDILPYKVSAEEKISKEAAMATGGTSGQGGARRVITAGGGRRRPDPG	1307
rpsC_lf.cluster1363	4	Ga0577642_0326077_625_1380	Ga0577642_0326077	1	VGQKIHPIGLRLGIIKDWESKWYAEKNFADLIQEDQALRRHIKKKLGRAGISRIEIERTANRVRLTIHSARPGIIIGRGGTGIDALKKELDSLTGKQIQLNVQEIRRAELEATLVAQNVASQLERRVAYRRAMKQAVARTHRSGAKGIRISCAGRLAGAEIARYEWYRDGRVPLQTLRADIDFGVAEALTTYGRIGVKVWIYRGDVLPERRRPGELRGRPGETVVLPSRMPRVTVQRRPEANVDAQAGEVS	1526
rpsC_lf.cluster1364	3	Ga0577632_0122439_1571_2326	Ga0577632_0122439	1	MGQKVNPLGIRLGITRDWTSKWYAGKKQFPQHVYTDWRVRGFLRSRLAEASVSRVHIERAAKKVNITIQTARPGIVIGKKGEDIEKLRLETAKLLGMTVGDVRLNIAEIRKPELDAQLVADSIAQQIEKRVMFRRAMKRAVMSTMRSGALGVKVRVSGRLNGGEIARTEQYREGRIPLHTFRADIDYGLSESHTTYGVIGVKVWIFKGEVFDKAQIEQAAAESEAAQGTPAPAPAVAPAAPAASAEATAQA	2628
rpsC_lf.cluster1365	6	Ga0577642_0121275_1606_2361	Ga0577642_0121275	1	VGQKVHPIGYRLGFTKTWNAKWFAEAKNYRILLKEDIAIRTTIRARLRDAAIARIDIERSTNQVTVTIQTAKPGVVIGKGGAKVEELRQALGKATGKVVKVNIFEIRYPELDANLIAENVAQQLERRVSFRKVLKQTVSRSMKAGAKGVRVAVAGRLGGAEMSRREWEREGRVPLHTLRADIEFGRAIAKTTFGTIGVKAWVYRGDIEPAPRQVSQNAPAAALRPAVLGAPAAVGAPAPVAAPVGGPVGTP	2555
rpsC_lf.cluster1366	2	Ga0577637_0134971_821_1576	Ga0577637_0134971	1	VGQKVNPHGFRLGITTDFKSRWYADKLYKEYVAEDVAIRRMLQRGMERAGISKVEIERTRDRVRVDIHTARPGIVIGRRGAEADRIRGDLEKLTSKQIQLNILEVKNPEIDAQLVAQGVAEQLSSRVSFRRAMRKAIQSAMKGGAKGIRVQCSGRLGGAEMSRSEFYREGRVPLHTLRADIDYGFYEARTTFGRIGVKVWIYKGEAPTSRAGREAQQAALRAAAQQRAPRGPREPQRRRRAPETAAAGEEG	1587
rpsC_lf.cluster1367	1	Ga0577630_0417740_424_1179	Ga0577630_0417740	1	IKRPELDAKLVAQSIAEQLQNRVAFRRAMKRALTSAMRSGAKGCKIQVGGRLGGAEMARSESYSDGRVPLHTLRADIDYGFYEARTTFGRIGVKCWINKGEIMPVGFSGQDLTSLDEPAGGPAGADDDRRGGRGRDGRGRGDGRGGGGQGGGGGRGRGGQGGGGGGGRGGGPGGPGGRGGGGGFGGGGGGGGRGGGAGGGGGRGGGGGFGGGGAGGGRGGGGGFGGGGGRGGGAGGGRGGGRPDLSGGISR	1179
rpsC_lf.cluster1368	4	Ga0577634_0028037_365_1120	Ga0577634_0028037	1	VGQKIHPIGLRLGIVKDWESKWYAEKNFPDLIQEDQILRRHIKRKLGRAGISRIEIERTDNRVRITIHSARPGIIIGRGGTGIDALKKELEAMTAKQIQLNVQEIRRAELEAVLVAQNVAGQLERRVAYRRAMKQAVARSLRSGAKGIRISCRGRLAGAEIARYEWYRDGRVPLQTLRADIDFGIAEALTTYGRIGVKVWIYRGDVLPERRRPGEMRGRPGETVVLPSRMPRVVVQRRPEPHADAQEGEVS	6654
rpsC_lf.cluster1369	2	Ga0577643_00037240_602_1357	Ga0577643_00037240	1	VGQKIHPIGLRLGIVKDWESKWYAEKNFPDLLQEDQVLRRHIKKKLGRAGISRIEIERTANRVRITIHSARPGIIIGRGGTGIDALKKELDQLTGKQIQLNVQEIRRAELEATLVAQNVASQLERRVAYRRAMKQAVARTLRSGAKGIRISCSGRLAGAEIARYEWYRDGRVPLQTLRADIDFGVAEALTTYGRIGVKVWIYRGDVLPERRRPGELRGRPGETVVLPSRMPRVNVQRRPEANVNAQAGEVS	5267
rpsC_lf.cluster137	2	Ga0577624_0023783_2545_3591	Ga0577624_0023783	1	VGHKVHPNAFRLGVYRPWEATWFASSKDYTKLLHEDLSMRQLILGRLRNAGIAKIETERSSSTTNAQMTITIHTAKPGIVIGKGGASVDLLREDLEKKFGNRVRISIQEIKQPELDAQLVAENIASQIERRISHRRAMKQAILRTMRAGAKGVRIALAGRLRGAEMARREWDREGRVPLHTLRADIRFGRATAKTTFGMIGVKCWIYRDLYAPKQRGGEVGDGESPQAPEAAQAAGAPAAGPGDAERASAQRRRSPRGQGGRAPQAGPPASRPPGGPGTRSPRRTGPEPPAAAQPAPPAAAPPAAAQPAPPAAAPPAAAQPAPSAGDPPAPPAADAAGETNEGVDAST	6145
rpsC_lf.cluster1370	1	Ga0480585_0152603_431_1186	Ga0480585_0152603	1	MGQKVNPLGIRLGITRDWTSKWYAGKKQFPQHVYTDWRVRGFLRSRLSEASVSRIQIERAAKKVNITIQTARPGIVIGKKGEDIEKLRLETAKLLGMPIGDVRLNIAEIRKPELDAQLVADSIAQQIEKRVMFRRAMKRAVMSTMRSGALGVKVRVSGRLNGGEIARTEQYREGRIPLHTFRADIDYGLSESHTTYGVIGVKVWIFKGEVFDKAQIEQAAAEGEAAQAAGTPAPAPVVAPPAPAADAPAQA	1272
rpsC_lf.cluster1371	1	Ga0480452_0001776_5000_5752	Ga0480452_0001776	1	MGQKINPIGFRLGVNRTWDSRWFADGATYARLLHQDLKLRTWLKERLNAAGVSRIIIERPHKKCRVTIYAARPGVVIGKKGADIEKLRKDISAQTEGEVHLNIVEVRKPETDAQLIAENIAQQLERRIAFRRAMKRSMQSAMRLGAKGVRINVSGRLGGAEIARMEWYREGRVPLHTLRADIDYGFIEAKTTYGIIGVKVWVFKGEVLEHDPMAQDKRWALEAAGPSSNEGRGGDRGGRNDRGQRRGREG	13529
rpsC_lf.cluster1372	2	Ga0577627_0351466_840_1592	Ga0577627_0351466	1	LGQKVHPYGFRLGYNKDWHSHWFAKKQFGDFLIEDLKLKAELKRRFTGAGVSHVDVERAANRLKIIIYTSRPGIIIGRKGSEIDKLKGDISSRTGREVLVSIQEIHKPELNAQLQAEKIAAQLEKRIAFRRAMRKAVEESLRFGAQGIKVKVSGRLNGAEIARSEWHLQGQLPLHTLRSDVDYGFAEAHTTFGVIGVKVWIYRGQILDANAAMARGTGTDPINETRGPGQREGRQRPARARRERPERPDR	1811
rpsC_lf.cluster1373	7	Ga0480449_0061399_2050_2802	Ga0480449_0061399	1	LSVTKYFIKDVSRRLEIDEHLALELKRAGYSHVELTKSPVGTRVVIYAAKPGMVIGRRGQSIRDLTKVLEEKFHIENPQLSVANIEVPEQDPKVVASQVSQALQRGVHFRRAAYWAIQRVMESQALGVEITIRGKLTTERSRFEKFKAGYLPRVGDPVLKSVKTAVADVQLKQGLFGINVRILPPQINYVDKPIMLTPPAETAPQPAVAVKEVEPVAAPGVVVEVETTAGDVAVVVEDKEEEETGDSEKA	2886
rpsC_lf.cluster1374	3	Ga0577635_0000015_4786_5538	Ga0577635_0000015	1	LGQKVHPYGFRLGYNKDWHSHWFAKKQYGDFLIEDLKLKAELKRRFTGAGVSHVDVERAANRLKIIIYTSRPGIIIGRKGSEIDKLKGDISSRTGREVLVSIQEIHKPELNAQLQAEKIAAQLEKRIAFRRAMRKAVEESLRFGAQGIKVKVSGRLNGAEIARSEWHLQGQLPLHTLRSDVDYGFAEAHTTFGVIGVKVWIYRGVILDANAAMARGTGTDPINETRGPGQREGRQRPARARRDRPERPER	194317
rpsC_lf.cluster1375	5	Ga0480449_0345627_161_913	Ga0480449_0345627	1	LSVTKYFVKDVSRRLEIDEHLALELKRAGYSHVELTKSPVGTRVVIYAAKPGMVIGRRGQSIRDLTKVLEEKFHIENPQLSVANIEIPEQDPKVVASQVSQALQRGVHFRRAAYWAIQRVMESQALGVEITIRGKLTTERSRFEKFKAGYLPRVGDPVLKSVKTAVADVQLKQGLFGINVRILPPQIDYIDKPIMLTPPAQTAPQPAVLVKDVEPVAAPEVVVEVETTAGDVAVVVEEKEEEETGDSEKA	1162
rpsC_lf.cluster1376	8	Ga0577618_0111468_31_783	Ga0577618_0111468	1	LSVTKYFIKDVSRRLEIDEHLALELKRAGYSHVELTKSPVGTRVVIYAAKPGMVIGRRGQSIRDLTKVLEEKFHIENPQLSVANIEVPEQDPKVVASQVSQALQRGVHFRRAAYWAIQRVMESQALGVEITIRGKLTTERSRFEKFKAGYLPRVGDPVLKSVKTAVADVQLKQGLFGINVRILPPQIDYIDKPIMLTPPAQTTPQPVTPAKEIEPAAAPEVAVEVETQTGDVAVVVEEKEEEETGDSEKA	3222
rpsC_lf.cluster1377	1	Ga0480588_0084675_1273_2025	Ga0480588_0084675	1	IEIERTRERLRVDVHTARPGIVIGRRGAQADELRTGLTAISGNNKVQLNIQEIKQPELDAALIAQGVADQLAGRVAFRRAMKRAVQSAQKAGALGIRVQCSGRLGGAEMSRTEWYREGRVPLHTLRADIDYGFREARTPAGRIGVKVWLYKGDILPYKAQSDDKITREAAMAVGETSGAGEPRRVVSSSAAARRRPDAAAGPETDAPVEAEPLVKEADPELERLLAEEEEIERRVHDHHETPKFHPGDGD	2026
rpsC_lf.cluster1378	3	soilwarming_2_heated_60-80_052018_S25_1519_2	soilwarming_2_heated_60-80_052018_S25_1519	1	MSVTKYFIKDLSRRLEIDEHLALELKRAGYSHVELTKSPVGTRVVIYAAKPGMVIGRRGQSIRDLTKVLEEKFHIENPQLSVANIEVPEQDPKVVASQVSQALQRGVHFRRAAYWAIQRVMESQALGVEITIRGKLTTERSRFEKFKAGYLPRVGDPVLKSVKTAVADVQLKQGLFGINVRILPPQIDYIDKPIMLTPPAQTTPQPVTPAKEIEPAAAPEVAVEVETQAGDVAVVVEDKEEEETGDSEKA	7218
rpsC_lf.cluster1379	1	Ga0577625_0052031_418_1170	Ga0577625_0052031	1	MGQKIHPTGFRLALNRNWASRWYANNKNFSSMLLEDVKVRDFLKEKLGHAAVSRVVIERPAKNARITIFSARPGVVIGKKGEDIESLKAQLQRMLGVPVHVNIEEVRKPELDAQLISDSIAQQLQKRIMFRRAMKRAITNAMRLGAQGIKIMSAGRLNGIEIARTEWYREGRVPLHTLRADIDYGFSEAKTTYGVIGIKVWVFKGEIMPKGEQNLLAPQTQLPEPEAPAPRKPRKQPARTGARRATASQT	4095
rpsC_lf.cluster138	2	Ga0577625_0021843_649_1692	Ga0577625_0021843	1	VGQKVNPHGFRLGITTDWTSRWYADKNYADYVKEDVAIRKLMSKGMERAGISKVEIERTRDRVRVDIHTARPGIVIGRRGAEADRIRGDLEKLTGKQVQLNILEVKQPESDAQLVAQGVAEQLSSRVSFRRAMRKSMQSAMKSPGVKGIRVQCAGRLGGAEMSRSEFYREGRVPLHTLRADIDYGVYEARTTFGRIGVKVWIYKGDKVMSRAEREAQEAALRQQRRDRPARRGPRSGSTGTTAGGTEAGRQAVEDPQTDGDHVLATAEPEVANAPVERTPDVAETPAVPLAEVSSGESEGGPATSSTEASAAGATAEAAAPETAATEVSPAETPGDVAATETPETEA	6375
rpsC_lf.cluster1380	6	Ga0577619_00419512_1084_1836	Ga0577619_00419512	1	LSVTKYFIKDVSRRLEIDEHLALELKRAGYSHVELTKSPVGTRVVIYAAKPGMVIGRRGQSIRDLTKVLEEKFHIENPQLSVANIEVPEQDPKVVASQVSQALQRGVHFRRAAYWAIQRVMESQALGVEITIRGKLTTERSRFEKFKAGYLPRVGDPVLKSVKTAVADVQLKQGLFGINVRILPPQINYIDKPIMLTPPAETAPQPAVAVEEVEPVAAPGVVVEVETTVGDVAVVVEDKEEEETGDSEKA	2192
rpsC_lf.cluster1381	2	Ga0577633_0039715_4004_4756	Ga0577633_0039715	1	LSVTKYFVKDVSRRLEIDEHLALELKRAGYSHVELTKSPVGTRVVIYAAKPGMVIGRRGQSIRDLTKVLEEKFHIENPQLSVANIEIPEQDPKVVASQVSQALQRGVHFRRAAYWAIQRVMESQALGVEITIRGKLTTERSRFEKFKAGYLPRVGDPVLKSVKTAVADVQLKQCLFGILVRILPPQIDYIDKPIMLTPPAETSPQPAALAKEPEPVAAPEVVVEVETTAGDVAVVVEDKEEEETGDSEKA	5380
rpsC_lf.cluster1382	1	Ga0480455_00371216_728_1480	Ga0480455_00371216	1	LSVTKYFVKDVSRRLEIDEHLALELKRAGYSHVELTKSPVGTRVVIYAAKPGMVIGRRGQSIRDLTKVLEEKFHIENPQLSVANIEIPEQDPKVVASQVASALQRGVHFRRAAYWAIQRVMESQALGVEITIRGKLTTERSRFEKFKAGYLPRVGDPVLKSVKTAVADVQLKQGLFGINVRILPPQVDYIDKPIMLTPPAETTPLPVAPVKEAEQIAMPVVEVEVETVVGDVPVIVEDKEKEETGDSEKA	2038
rpsC_lf.cluster1383	8	Ga0480449_0000147_19925_20677	Ga0480449_0000147	1	LSVTKYFIKDVSRRLEIDEHLALELKRAGYSHVELTKSPVGTRVVIYAAKPGMVIGRRGQSIRDLTKVLEEKFHIENPQLSVANIEVPEQDPKVVASQVSQALQRGVHFRRAAYWAIQRVMESQALGVEITIRGKLTTERSRFEKFKAGYLPRVGDPVLKSVKTAVADVQLKQGLFGINVRILPPQIDYIDKPIMLTPPAETAPQPAAPAKEVGPVVEPEVVVEVETTAGDVAVVVEDKEEEESGDSEKA	35125
rpsC_lf.cluster1384	5	Ga0577623_0505431_348_1100	Ga0577623_0505431	1	LSVTKYFVKDVSRRLEIDDHLALELKRAGYSHVELTKSPVGTRVVIYAAKPGMVIGRRGQSIRDLTKVLEEKFHIENPQLSVANIEVPEQDPKVVASQVASALQRGVHFRRAAYWAIQRVMESQALGVEITIRGKLTTERSRFEKFKAGYLPRVGDPVLKSVKTAVADVQLKQGLFGINVRILPPQMNYIDKPIMLTPPAETTPQPAPPAKEAEQIAMPAIEVEVETVVGDVPVVVEDKEEEETGDSEKA	1107
rpsC_lf.cluster1385	9	Ga0480585_0051031_401_1153	Ga0480585_0051031	1	MGQKIHPTGFRLALNKNWASKWYANNKNFSGMLLEDVKVRAFLKEKLAHAAVSRVVIERPAKNARITIFSARPGVVIGKKGEDIESLKGQLQRMLGVPVHVNIEEVRKPELDAQLISDSIAQQLQKRIMFRRAMKRAITNAMRLGAQGIKIMSAGRLNGIEIARTEWYREGRVPLHTLRADIDYGFSEAKTTYGVIGIKVWVFKGEILPKNEQALLGAIPPAAEPEQPPARKPRKTPARTGARRATTSQT	2110
rpsC_lf.cluster1386	2	Ga0577638_0556544_649_1401	Ga0577638_0556544	1	VGQKVNPHGFRLGITTDFKSRWYADKLYKEYVAEDVAIRRMLQRGMERAGISKVEIERTRDRVRVDIHTARPGIVIGRRGAEADRIRGDLEKLTAKQIQLNILEVKNPEIDAQLVAQGVAEQLSSRVSFRRAMRKAIQSAMKGGAKGIRVQCSGRLGGAEMSRSEFYREGRVPLHTLRADIDYGFYEARTTFGRIGVKVWIYKGEAPTSRAGREAQQAALRAAAQQRTQRPREPQRRRRAPETAAAGEEG	1696
rpsC_lf.cluster1387	1	Ga0480584_0077729_1155_1907	Ga0480584_0077729	1	VRVDIHTARPGIVIGRRGAEADRIRSDLEKLTSKQIQLNILEVKNPEIDAQLVAQGVAEQLSSRVSFRRAMRKAMQTAMKGGAKGIRVQCAGRLGGAEMSRSEFYREGRVPLHTLRADIDYGFYEARTTFGRIGVKVWIYRGEAAQTRAEREAAAAALRAGQRPGGRDRDRDRDRGPQRGRRRPGGPDAGGDRGGDRGERGDRAPEARDQQAAREQQTAREQQTVGASTPASTPAGGPAGGPGASSGEEG	1922
rpsC_lf.cluster1388	1	Ga0577639_0480958_1_753	Ga0577639_0480958	1	DVEIRKMLSKGMERAGISKVEIERTRDRVRVDIWTARPGIVIGRRGAEADRIRGNLEKLSGKQVQLNIREVKNAESDAQLVAQGVAEQLSNRVAFRRAMRKAIQTAMRSPQVKGIRVQCSGRLGGAEMSRSEFYREGRVPLHTLRADIDYGLFEARTTFGRIGVKVWIYKGDVVGGRRELAAATDAPSSAPRRERPTRRRSGASGTTATSTDAGRAAAQQASAPGSVAVEEQPAPASPEATATETSGGEG	1215
rpsC_lf.cluster1389	2	soilwarming_3_unheated_0-10_052018_S11_458_2	soilwarming_3_unheated_0-10_052018_S11_458	1	MGQKVHPYGFRVGYNKDWHSHWYAKKEFAAFLAEDLQLKRDLKKRFTGAGVSHIDVERAANRLKIIIYTSRPGIIIGRKGSEIEKLKEDLSKKTGREVIVSIQEITKPELNAQLQAEKIAQQLEKRIAFRRAMRKILEESQRFGAQGVKVMCAGRLNGAEIARTEWSLEGRLPLHTLRADIDYGFAEALTTFGIIGVKVWIYRGDILDPNASIARGTTSDPINEPKVQGGGRGDRRPPRRDRGDRNDNRR	4579
rpsC_lf.cluster139	2	Ga0577634_0499509_44_1087	Ga0577634_0499509	1	VGHKVNPIGFRLGVYRNWEARWYADKDYTKLLHEDLAMRRLINSRLRNAGLARIETERSANQLTVVIQTAKPGIVIGKQGASVDALRDELERITGKKVRVTIHEIKNPEMDAKLVAENVASQLEKRIAFRRAIKQSIMRTMRAGAKGVRIQVSGRLGGSEMSRREWDRDGRVPLHTLRANIDYGVTEARTTFGRIGVQVWIYKGDFVTATGEPIAADGTTRSQREAAGDGEPTGSATLVPRAPRRAPAVVEAPEPPELQPEQEKVAIAEMPADIAEAQVEAAEAAEVEEAIDSDDEIVAALDVPGVPDTEEVAPKRVPVKRKTTTARRPSTKSKAAPPAGTPDAEEE	1515
rpsC_lf.cluster1390	3	Ga0577643_00041966_1567_2319	Ga0577643_00041966	1	LSVTKYFIKDVSRRLEIDEHLALELKRAGYSHVELTKSPVGTRVVIYAAKPGMVIGRRGQSIRDLTKVLEDKFHIENPQLSVANIDVPEQDPKVVASQVASALQRGVHFRRAAYWALQRVMESQALGVEITIRGKLTTERSRFEKFKAGYLPRVGDPVLKSVKTAVADVQLKQGLFGINVRILPPQANYIDKPIMLNPPVEATPPTVTPAKEAEPVAMPAIEVEVETTAGDVAVVVEDKEEEETGDSEKA	5010
rpsC_lf.cluster1391	1	Ga0577618_0388636_900_1652	Ga0577618_0388636	1	QKVHPIGYRLGFTKTWNAKWFAEAKNYRILLKEDIAIRSTIRGRLRDAAIARIDIERSTNQVTVTIQTAKPGVVIGKGGAKVEELRQALGKATGKVVKVNIFEIRYPELDANLIAENVAQQLERRVSFRKVLKQTVSRSMKAGAKGVRVAVAGRLGGAEMSRREWEREGRVPLHTLRADIEFGRAIAKTTFGTIGVKAWVYRGDIEPAPRQVSQNAPAAAARPAVLGAPQTSPAPATPIAPAHAPTGPVA	1654
rpsC_lf.cluster1392	8	Ga0577619_00731976_793_1545	Ga0577619_00731976	1	VGQKVNPHGFRLGITTDFKSRWYADKLYKEYVAEDVAIRRMLQRGMERAGISKVEIERTRDRVRVDIHTARPGIVIGRRGAEADRIRGDLEKLTAKQIQLNILEVKNPEIDAQLVAQGVAEQLSSRVSFRRAMRKAIQSAMKGGAKGIRVQCSGRLGGAEMSRSEFYREGRVPLHTLRADIDYGFYEARTTFGRIGVKVWIYKGEAPTSRAGREAQQAALRAAAQQRTQRPREPQRRRRAPEAAVVGEEG	1601
rpsC_lf.cluster1393	1	Ga0577643_00011702_410_1162	Ga0577643_00011702	1	LSVTKYFIKDVSRRLEIDEHLALELKRAGYSHVELTKSPVGTRVVIYAAKPGMVIGRRGQSIRDLTKVLEEKFHIENPQLSVANIEVPEQDPKVVASQVSQALQRGVHFRRAAYWAIQRVMESQALGVEITIRGKLTTERSRFEKFKAGYLPRVGDPVLKSVKTAVADVQLKQGLFGINVRILPPQIDYIDKPIMLTPPAETAAQPTAPAKEVEPLAAPEVVVEVETTVGDVAVVVEDKEAEETGDSEKA	8435
rpsC_lf.cluster1394	2	Ga0577642_0232251_368_1120	Ga0577642_0232251	1	LSVTKYFVKDVSRRLEIDEHLALELKRAGYSHVELTKSPVGTRVVIYAAKPGMVIGRRGQSIRDLTKVLEEKFHIENPQLSVANIEVPEQDPKVVASQVASALQRGVHFRRAAYWAIQRVMESQALGVEITIRGKLTTERSRFEKFKAGYLPRVGDPVLKSVKTAVADVQLKQGLFGINVRILPPQIDYIDKPIMLTPPAETTPLPVAPAKEAEQIAMPAVEVEVETVVGDVPVVVEDKEEEETGDSEKA	1835
rpsC_lf.cluster1395	4	Ga0480588_0061391_1207_1959	Ga0480588_0061391	1	MGQKIHPIGFRLALNKNWASRWYANNKNFPVMLLEDVKVRAFLKEKLAHAAVSRVVIERPAKNARITIFSARPGVVIGKKGEDIESLKSQLQKMLGVPVHVNIEEVRKPELDAQLISDSISQQLQKRIMFRRAMKRAITNAMRLGAQGIKIMSAGRLNGIEIARTEWYREGRVPLHTLRADIDYGFAEAKTTYGVIGIKVWVFKGEIMPKGELNLLAPQQPVVEPEQPAPRKPRKTPARTGARRATTSQT	2405
rpsC_lf.cluster1396	3	Ga0577619_01376188_68_820	Ga0577619_01376188	1	LSVTKYFIKDVSRRLEIDEHLALELKRAGYSHVELTKSPVGTRVVIYAAKPGMVIGRRGQSIRDLTKVLEEKFHIENPQLSVANIEVPEQDPKVVASQVSQALQRGVHFRRAAYWAIQRVMESQALGVEITIRGKLTTERSRFEKFKAGYLPRVGDPVLKSVKRAVADVQLKQGLFGINVRILPPQIDYIDKPIMLTPPAETAPQPAVAVKEVEPVAAPEVVVEVETTAGDVAVVVEDKEEEDTGDSEKA	1092
rpsC_lf.cluster1397	2	soilwarming_3_heated_60-80_052018_S30_13973_5	soilwarming_3_heated_60-80_052018_S30_13973	1	MGQKTHPIGLRLGIVKTWDSRWFAKRNYAELLREDLLIKRYLKKRLYQAGISKITIERKGDKVTIGIRTARPGLVIGRKGEQVDKLSEEMKQLTKKVVQLNIEEIKRADLDAQLVAEHIAKQLEQRVSFRRCMKKAIASSMRAGAQGIRVACSGRLGGSEMARYETYREGRVPLHTLRADIDFARATAFTPYGTCGVKVWMFHGELLDKPAAGITERGAEPDHGMRAAPTGGRSRPVSERGAGVASPATR	2781
rpsC_lf.cluster1398	3	Ga0577616_0063302_320_1072	Ga0577616_0063302	1	MGQKVNPLGIRLGITRDWTSRWYAGKKQFPLHVHTDFRVREFLKERLAEASVSRIQIERAAKKVNITIQTARPGIVIGKKGEDIEKLRQETAKLLGMAVLDVRLNIAEIRKPELDAQLVADSIAQQIEKRVMFRRAMKRAVMSTMRSGALGVKVRVSGRLNGSEIARTEWYREGRIPLHTFRADIDYGLSESMTTYGVIGVKVWIFKGEVFDKVELAQPVAEGEAAPAQAAPAQAAPATPATPAEAPAQA	2728
rpsC_lf.cluster1399	2	soilwarming_3_unheated_10-30_052018_S12_15722_2	soilwarming_3_unheated_10-30_052018_S12_15722	1	MGQKVHPYGFRVGYNKDWHSHWFAKQEFAKFLAEDLNLKRDLKKRFAGAGVSHIDIERAATRLKIIIYTSRPGIIIGRKGAEIEKLREDLSKKTGREVLISIQEIRHPELNAQLQAEKIAQQLEKRIAFRRAMKKTIEETNRFGAQGIKVMIAGRLNGAEIARTEWSLEGRLPLHTLRADIDYGFAEALTTFGIIGVKVWIYRGEILDPNASMARGTTTDPVNEVKANHGARGDRRPRRDRDDRGGGGRR	1763
rpsC_lf.cluster14	8	soilwarming_2_heated_60-80_052018_S25_19455_1	soilwarming_2_heated_60-80_052018_S25_19455	1	MGQKVHPNAFRLGIYRPWQARWYADKDYTDMLLEDMKMRRLILNRLRNAGISKVETERAANQATVVIWTAKPGIVIGKGGASVDQLRDDLEKMTGKKVRVTIQEIKHPELDAMLVAQNVAAQLERRIAFRRAVKQSVLRTMRAGAKGVKIMVSGRLGGAEMSRREWDRDGRVPLHTLKANIDFGQTEARTTFGRIGVSVWVYLGDFDLTTHEEPFEEIPARQLLDEPRRLPPVATNGQAAEAAATLAAAIAEAAAPAEETPAVLAAEPTPEAASRPKRAPRATAAKVAKPEDAEAKVVAKAAKTPTAEPKPATATARRTTGKAAGAENAEPAAGVEAKPEAVSTTKAGTRSKAGTAVAGTKTGAAARPKTPAKAPAEKPRASRPKKSDPGDTGKEKA	1913
rpsC_lf.cluster140	1	Ga0577643_00680068_270_1313	Ga0577643_00680068	1	MGHKVNPIGFRLGVYRNWDARWYADKDYTKLLHEDIAMRRLIGSRLRNAGVARIETERSANQLTVIIQTAKPGIVIGKQGASVDALRDELERISGKKVRVTIHEIKTPELDATLVAENVASQLEKRIAFRRALKQTLMRSMRAGAKGARIQVSGRLGGAEMSRREWDRDGRVPLHTLRANIDYGQAEARTTFGRIGVQCWLYLGDFVSATGEPLPASGRERPEEAEPAEAVERTVVIPAAAAAVETVAEPVTAPADADGESAVEESFPEIPEEPAEEEEEIVEGDEEIAAVVSHVPASDEKVEKLTPKRAAARRKPTTARKPAAPSRAAKKPVKKPAAAEPEPEDEE	1334
rpsC_lf.cluster1400	4	Ga0577617_0565930_33_785	Ga0577617_0565930	1	VGQKVNPHGFRLGITTDFKSRWYADKLYKEYVAEDVAIRRMLQRGMERAGISKVEIERTRDRVRVDIHTARPGIVIGRRGAEADRIRGDLEKLTSKQIQLNILEVKNPEIDAQLVAQGVAEQLSSRVSFRRAMRKAIQSAMKGGAKGIRVQCSGRLGGAEMSRSEFYREGRVPLHTLRADIDYGFYEARTTFGRIGVKVWIYKGEAPTSRAGREAQQAALRAAAQQRPQRPREPQRRRRGAEAATAGEEG	1174
rpsC_lf.cluster1401	5	soilwarming_3_unheated_45-60_052018_S14_7810_3	soilwarming_3_unheated_45-60_052018_S14_7810	1	MGQKVHPLGFRLGFVKTWNAKWYAGSKNYPVLLKEDVAIRSGIRARLRDAAISRIEIERSTNQVTVTIHTAKPGVVIGKGGAKVEELRQVLGKTTGKAVKVNIFEIRYPELDAMLIAENVAQQLERRVSFRKVLKQTVLRSMKSGAKGVRVAVAGRLGGAEMSRREWEREGRVPLHTMRADIEFGRAIAKTTYGTIGVKAWVYKGDIEPAPRQVTQNAPGGLAPRPAAPLPPPPAPTPLVAPTAPPAVGV	1676
rpsC_lf.cluster1402	3	Ga0577643_00101233_2449_3201	Ga0577643_00101233	1	LSAVKNVMKNNFRNLELDEYLAATLKDAGYGDVDIQKTPIGTRITLYVTRPGLVIGRKGIGIKDLTTRLEEKFGLTNPQISVLEVSVPELNPKIMCNRIAQLIERGTAFRRAAMWSMNTIMNAGALGVEVAIAGKLRSERAHFEKHSSGVIPKSGDLAEKIVRIGTTSVLTKMGLMGIQLRIALKNELPQDFEFSESAVQVDSSPPSQTAAGVGAEQSTIAATDAGDVALKPTVADREKMVSPGNTNGQT	3419
rpsC_lf.cluster1403	1	Ga0480585_0001153_3581_4333	Ga0480585_0001153	1	MGQKVHPLGFRLGFVKTWNAKWYAGSKNYPVLLKEDVAIRSGIRARLRDAAISRIEIERSTNQVTVTIHTAKPGVVIGKGGAKVEELRQVLGKTTGKAVKVNIFEIRYPELDAMLIAENVAQQLERRVSFRKVLKQTVLRSMKSGAKGVRVAVAGRLGGAEMSRREWEREGRVPLHTMRADIEFGRAIAKTTYGTIGVKAWVYKGDIEPAPRQVTQNAPGGLAQRPAAPLPPPPAPAPLVAPSAPPAVGV	9210
rpsC_lf.cluster1404	2	Ga0577633_0603157_2_754	Ga0577633_0603157	1	KLTGKQVQVNVVEIKTIELDARLVGQNIVDQLEKRIAFRRAMKQAIMRTMKAGARGVKVQVSGRLGGAEIARTERNHDGKVPLHTLRADIDYAHVEAFTTFGRIGVKVWIYKGEVLPDQPRGEREVQGRPGAAGDAARFRDNRRGTRGGRGRGEGRPAGAPRADEAPAIDTADAMRAALTEGPSLESVIEGGAPVEHHHTGPHAGAVTHETSAEHGRGVTTETSVVPPETQATHDDAERPGAPSVENEGQ	1243
rpsC_lf.cluster1405	1	Ga0577634_0312095_1197_1949	Ga0577634_0312095	1	LSVTKYFIKDVSRRLEIDEHLALELKRAGYSHVELTKSPVGTRVVIYAAKPGMVIGRRGQSIRDLTKVLEEKFHIENPQLSVANIEVPEQDPKVVASQVSQALQRGVHFRRAAYWAIQRVMESQALGVEITIRGKLTTERSRFEKFKAGYLPRVGDPVLKSVKTAVADVQLKQGLFGINVRILPPQIDYIDKPIMLTPPAQTTPQPVTPAKEIEPAAAPEVAVEIETQAGDVAVVVEDKEEEKTGDSEKA	1985
rpsC_lf.cluster1406	2	soilwarming_1_heated_10-30_052018_S17_5879_1	soilwarming_1_heated_10-30_052018_S17_5879	1	MGQKVHPIGYRLGFTKTWNAKWFAEAKNYRILLKEDINIRSTIRGRLRDAAIARIDIERSTNQVTVTIQTAKPGVVIGKGGAKVEELRQALGKTTGKVVKVNIFEIRYPELDANLIAENVAQQLERRVSFRKVLKQTVSRSMKAGAKGVRVAVAGRLGGAEMSRREWEREGRVPLHTLRADIEFGRAIAKTTFGTIGVKAWIYRGDIEPAPRAVPQGTQASVSAPRPTPPMPPQAPLAAAPAPTAPSPA	1482
rpsC_lf.cluster1407	8	Ga0577619_00350915_1512_2261	Ga0577619_00350915	1	LSVTKYFIKDVSRRLEIDEHLALELKRAGYSHVELTKSPVGTRVVIYAAKPGMVIGRRGQSIRDLTKVLEDKFHIENPQLSVANIEVPEQDPKVVASQVASALQRGVHFRRAAYWAIQRVMESQALGVEITIRGKLTTERSRFEKFKAGYLPRVGDPVLKSVKRAVADVQLKQGLFGINVRILPPQIDYIDKPIMLTPPAQTTPQPAAPAKEAEPIAAPEVAVEVDTPAEVGVVVENKEEEKTADSEKA	2413
rpsC_lf.cluster1408	1	Ga0577638_0370958_904_1653	Ga0577638_0370958	1	LSVTKYFVKDVSRRLEIDEHLALELKRAGYSHVELTKSPVGTRVVIYAAKPGMVIGRRGQSIRDLTKVLEDKFHIENPQLSVANIEVPEQDPKVVASQVASALQRGVHFRRAAYWAIQRVMESQALGVEITIRGKLTTERSRFEKFKAGYLPRVGDPVLKSVRRAVADVQLKQGLFGINVRILPPQIDYIDKPIMLTPPAQTTPQPAAPPKEAEPVPPAEVAVEIETPTEVSVVVENKEEEKTADSEKA	2141
rpsC_lf.cluster1409	8	Ga0577619_00169295_1421_2170	Ga0577619_00169295	1	LSVTKYFVKDVSRRLEIDEHLALELKRAGYSHVELTKSPVGTRVVIYAAKPGMVIGRRGQSIRDLTKVLEDKFHIENPQLSVANIEVPEQDPKVVASQVASALQRGVHFRRAAYWAIQRVMESQALGVEITIRGKLTTERSRFEKFKAGYLPRVGDPVLKSVKRAVADVQLKQGLFGINVRILPPQIDYIDKPIMLTPPAQTTPQPAAPAKEAEPVAAPEVAVEIETPTEVAVVVENKEEEKTADSEKA	3508
rpsC_lf.cluster141	2	Ga0577620_0023252_3020_4060	Ga0577620_0023252	1	MGQKVHPGGMRVGVIHDWKSNWYTGKKEFPGYLIEDIKIREHITNKLSHAGLSDILIRKDKQRVTVDIYTARPGIVIGKSGVEVDALRKELHAITKKNVHININEIKRPELDAKLVAQSIAEQLQNRVSFRRAMKRALASGIRSGAKGVRIQCGGRLGGTEMSRSEAYSEGRVPLHTIRADIDYGFVEAKTTFGRIGVKVWINKGEIMPEGYGGLDTEKDVRLGEQDQARRRRANVEGLGASREGGRDRQRDREGLGPVRPKRRGGGQGRGTGGQSAGRGGQGRGRPASPRTRAPQQDNVPSTDEVATSAEGLEAGQSPIEQQVEATPAPVADAPDATPPTEEKADT	4061
rpsC_lf.cluster1410	1	Ga0577638_0005612_8100_8849	Ga0577638_0005612	1	MGQKVNPIGLRLGINRTWDSRWFADGAEYAKLLHDDIKVRKELKKRLSQAGVSRIIIERPHKKCRITIYAARPGVIIGKKGADIEKLRKDLTVMTEGDVHLNIVEIRKPETDAQLVAENIAQQLERRVAFRRAMKRAIQSTMRLGAKGVRINVSGRLGGAEIARMEWYREGRVPLHTLRADIDYGFAEAKTTYGIIGVKTWVFKGEVLEHDPMAQDKRLASESGPAGEGGGRDRDRGDRPDRGRRERAN	15356
rpsC_lf.cluster1411	1	Ga0577615_0040070_2_748	Ga0577615_0040070	1	MGQKVHPESLRVGYIHDWKSNWFSEKNFSDYLDEDTRIRDHITGKLAHAGLSDITIRKDANEVEVNIHTARPGIVIGKSGSEVDALRKDLHRMTRKQIKVNILEIKRPELDAKLVAQSIAEQLQNRVAFRRAMKRALTSAMRSGAKGVKVQVGGRLGGAEMARSEGYSDGRVPLHTLRADIDYGFYEARTTFGRIGVKCWINKGEIMPEGYSGQDLTELEAPSSQAPPGGGRGGDGRGRGGPGGRGGGP	4673
rpsC_lf.cluster1412	3	Ga0577633_0000447_394_1143	Ga0577633_0000447	1	MATLIQEDLLIRTTIKKKLSRAGISRVEIERFGTQSGVGGKPQVRVIIHAARPGIIIGRGGTGIDALKKELDELTGKQVQLNVQEIRRPELEALLVAENVAQQLERRVAYRRAMKQAVQRSLRAGAKGIRISASGRLAGSEIARYEWYREGRVPLHTLRADIDFGIAEALTTYGRIGVKVWIYRGEILPERRPETELRRPPRTIERPAGGPADPASVTGGANGEPDRTVVIPTKVPRPVVTRRPSDVNA	31162
rpsC_lf.cluster1413	17	soilwarming_3_heated_50-60_052016_S47_30_62	soilwarming_3_heated_50-60_052016_S47_30	1	MGQKVHPYGFRLGYNKDWHSHWFAKKQFGDFLIEDLKLKAELKRRFTGAGVSHVDVERAANRLKIIIYTSRPGIIIGRKGSEIDKLKGDISSRTGREVLVSIQEIHKPELNAQLQAEKIAAQLEKRIAFRRAMRKAVEESLRFGAQGIKVKVSGRLNGAEIARSEWHLQGQLPLHTLRSDVDYGFAEAHTTFGVIGVKVWIYRGIILDPNAAMARGTGTDPINDTRPGQREGRARPARARRERPERPER	53250
rpsC_lf.cluster1414	13	Ga0480588_0025688_1983_2732	Ga0480588_0025688	1	VGQKVHPYGFRLGYNKDWHSHWFAKKQYGDFLIEDLKLKAELKRRFTGAGVSHVDVERAANRLKIIIYTSRPGIIIGRKGSEIDKLKGDISSRTGREVLVSIQEIHKPELNAQLQAEKIAAQLEKRIAFRRAMRKAVEESLRFGAQGIKVKVGGRLNGAEIARSEWHLQGQLPLHTLRSDVDYGFAEAHTTFGVIGVKVWIYRGVILDANAAMARGTGTDPINDTRPGQREGGRPRPQRPRRDRERTDR	3711
rpsC_lf.cluster1415	2	soilwarming_2_heated_60-80_052018_S25_34438_1	soilwarming_2_heated_60-80_052018_S25_34438	1	MSVTKYFVKDVSRRLEIDEHLALELKRAGYSHVELTKSPVGTRVVIYAAKPGMVIGRRGQSIRDLTKVLEDKFHIENPQLSVANIEVPEQDPKVVASQVASALQRGVHFRRAAYWAIQRVMESQALGVEITIRGKLTTERSRFEKFKAGYLPRVGDPVLKSVKRAVADVQLKQGLFGINVRILPPQIDYIDKPIMLTPPAQTTPQPAAPAKEAEPVAAPELAVEIETPAEVSVVVEDKEEEKTADSEKA	1389
rpsC_lf.cluster1416	1	Ga0577631_0408935_1_747	Ga0577631_0408935	1	MGQKIHPTGFRLAVTRNWGSRWYAGNSNFATMLNEDLKVRDFLKKKLKNASVGRVVIERPAKNARITIYSSRPGVVIGKKGEDIEVLKSALTKMMGVPVHVNIEEIRKPETDAQLIADSIAQQLEKRIMFRRAMKRAMQNAMRLGAQGIKIMSSGRLNGIEIARTEWYREGRVPLHTLRADIDYGFGEAETTYGIIGIKVWVYKGDRLASGEAPTIEAPADDDKKRRGPRRDDGKPGNRPRGRKPEGQP	1079
rpsC_lf.cluster1417	2	Ga0577641_0041015_3319_4068	Ga0577641_0041015	1	LSVTKYFVKDVSRRLEIDEHLALELKRAGYSHVELTKSPVGTRVVIYAAKPGMVIGRRGQSIRDLTKVLEEKFHIENPQLSVANIDVPEQDPKVVASQVSQALQRGVHFRRAAYWAIQRVMESQALGVEITIRGKLTTERSRFEKFKAGYLPRVGDPVLKSVKTAVADVQLKQGLFGINVRILPPQIDYIDKPIMLNPPAETTPQPVAVTPAKEAEPVVASEVVVEVEVPAGPVAVVVEDKEEEETGDS	4071
rpsC_lf.cluster1418	1	Ga0480455_00005120_3061_3810	Ga0480455_00005120	1	LGQKVNPNGFRLGIHRGWQSNWFVNKRDIPALIQEDQRIRVYLKKELSNAGVSKVEISRKAEQIQLDIFTARPGVVVGKGGQGIENLHLKVKQLLSRPGLDIRINILEINRVDLESQLVAESIAQQLEKRVAFRRAMKQAIQRCMRAGAVGVKIMVAGRLGGAEIARTEWTKEGRIPLQTLRADVDYGLAEGHTVMGLIGIKVWIFRGELEPGQWSPPNIKTQQERGTQEARSDRPGGGKSGRRSRKAG	13305
rpsC_lf.cluster1419	5	Ga0480452_0034570_123_872	Ga0480452_0034570	1	LSVTKYFVKDVSRRLEIDEHLALELKRAGYSHVELTKSPVGTRVVIYAAKPGMVIGRRGQSIRDLTKVLEDKFHIENPQLSVANIEVPEQDPKVVASQVASALQRGVHFRRAAYWAIQRVMESQALGVEITIRGKLTTERSRFEKFKAGYLPRVGDPVLKSVKRAVADVQLKQGLFGINVRILPPQIDYIDKPIMLTPPAQTTPQPAASAKEAEPIAAPEVAVEIETPAEVAVVVENKEEEKTADSEKA	3477
rpsC_lf.cluster142	1	Ga0480586_0063855_3_1046	Ga0480586_0063855	1	LAHAGLSDILIRKDKQRITVDIYTARPGIVIGKSGVEVDALRKELHAMTQKNVHININEIKRPELDAKLVAQSIAEQLSNRVAFRRAMKRALASAIRSGAAGVKIQCAGRLGGGEMSRSETYNEGRVPLHTIRADIDYGFVEARTSAGRIGVKVWINKGEIMPEGYEGVAQGDQRLGDQDTRRRRGGATEGLGASRESARQRGPDREGLGPVKRRRGPGGSGGAGGGGAGRGPGGAGGGRPGQRRGPGAGARPAGGGAGGGARPAGGGGGRPASSRPRKQDASVEKPRTDDDAVSAEGREQPVIEPQVEETPKPVADAPDTTTTKKQVEDPTKLDQSGDPSKEKSDN	1804
rpsC_lf.cluster1420	1	Ga0577625_0600305_397_1143	Ga0577625_0600305	1	MGQKAHPIGNRLGIIRGWDSNWFGGNNYSDKLVEDEKIRKYLSARINKGGVSKVVIERTLKRITVTIHTARPGIVIGKGGQEVDKIKEELKKLTKKDVQINIFEIKRPELDAQLVAEGIAKQLEARISFRRAMKTTIASTMRMGAEGIKVMTSGRLGGAEMARSEQYKEGRIPLHTFRADIDYALAEALTTYGKIGVKVWICKGEVYGKRDLSPNIGGTSSNSGKGGRPEGAPAFGGRDSQRGGERGGE	1143
rpsC_lf.cluster1421	3	Ga0577632_0003846_6222_6971	Ga0577632_0003846	1	LSVTKYFVKDVSRRLEIDEHLALELKRAGYSHVELTKSPVGTRVVIYAAKPGMVIGRRGQSIRDLTKVLEEKFHIENPQLSVANIDVPEQDPKVVASQISQALQRGVHFRRAAYWAIQRVMESQALGVEITIRGKLTTERSRFEKFKAGYLPRVGDPVLKSVKRAVADVQLKQGLFGINVRILPPQIDYIDKPIMLTPPAETATRPAAPAKEGPVVEPEVVVEVETTAGDVAVVVEDKEEEETGDSEKA	13299
rpsC_lf.cluster1422	4	Ga0577627_0022106_1739_2488	Ga0577627_0022106	1	VGQKVHPEGFRVGYIHDWKSNWFNEREFADYLLEDIKIREHIEGKLGHAGLSDIRIRKNKNEVTVDIHTARPGIVIGKSGTEVDALRRDLHKMTSKQVRVNILEVKRPELDAKLVAQSIAEQLQNRVAFRRAMKRALTSAIRSGATGVRVQVSGRLGGSEMARTEGYSEGRVPLHTLRADIDYGFYEARTTFGRIGVKCWINKGEVMPEGFRSAENLDQDRQPDRSPPPRRRRENRPPGGGQQDGRKRS	6583
rpsC_lf.cluster1423	6	Ga0577619_00623392_960_1709	Ga0577619_00623392	1	LSVTKYFVKDVSRRLEIDEHLALELKRAGYSHVELTKSPVGTRVVIYAAKPGMVIGRRGQSIRDLTKVLEDKFHIENPQLSVANIEVPEQDPKVVASQVASALQRGVHFRRAAYWAIQRVMESQALGVEITIRGKLTTERSRFEKFKAGYLPRVGDPVLKSVKRAVADVQLKQGLFGINVRILPPQIDYIDKPIMLTPPTQTTPQPVTPAKETEPVTVPEVAVEVETPTEVAVVVENKEEEKTADSEKA	1756
rpsC_lf.cluster1424	1	Ga0577615_0522413_461_1210	Ga0577615_0522413	1	MGQKVNPLGIRLGITRDWTSKWYASKKQFPQHVYTDFRVRGFLRSRLSEASVSRIHIERAAKKVNITIQTARPGIVIGKKGEDIEKLRLETARLLGMAVNDVRLNIAEIRKPELDAQLVADSIAQQIEKRVMFRRAMKRAVMSTMRSGALGVKVRVSGRLNGGEIARTEQYREGRIPLHTFRADIDYGLSESHTTYGVIGVKVWIFKGEVFDKAQIEQAAAEGEAAQQAAAPPPPPPPPAAPAEATVQA	1300
rpsC_lf.cluster1425	2	soilwarming_3_heated_45-60_052018_S29_15984_1	soilwarming_3_heated_45-60_052018_S29_15984	1	GIAGLQRSLSSAAISRVEIERAGNRVKVTLHTAKPGMIIGRQGKGVEDLKAALENLTKKQVHVNVIEIRHPDIDAQLVSESIAQQIEKRIAYKRAMRQAILRAMKLGIKGIRIMCSGRLAGAEMARREQDRQGKIPLHTIRADIDYGFAESATTYGNIGIKVWIYKGDVLPGQARQSEPELPRAARGEGRPDRSSERSDRGSDRRGGRGAGGGRGGGDRGGGGRGGGRPAGGFSGGGRPVRTEGEPADS	1535
rpsC_lf.cluster1426	1	Ga0577617_0132233_280_1029	Ga0577617_0132233	1	LSVTKYFVKDVSRRLEIDEHLALELKRAGYSHVELTKSPVGTRVVIYAAKPGMVIGRRGQSIRDLTKVLEEKFHIENPQLSVANIEVPEQDPKVVASQVASALQRGVHFRRAAYWAIQRVMESQALGVEITIRGKLTTERSRFEKFKAGYLPRVGDPVLKSVKRAVADVQLKQGLFGINVRILPPQIDYIDKPIMLTPPAQTTPQPVASAKETEPVTVPDVAVEVETPAEVAVVVEDKEEEKTADSEKA	2570
rpsC_lf.cluster1427	1	Ga0577620_0006975_5333_6079	Ga0577620_0006975	1	VGQKVHPYGFRLGYNKDWHSHWYAKKQFGEFLLEDLKLKKDLKGRFAGAGVSHVDIERAANRLKIIIYTSRPGIIIGRKGAEIDKLKGDLSIKTGREVLVSIQEIHKPELNAQLQAEKIAAQLEKRIAFRRAMRKAVEESLRFGAQGIKVKVSGRLNGAEIARSEWHLQGQLPLHTLRADIDYGFAEAHTTFGIIGVKCWIYRGEIMDARAAMARGTGSDPINETRAGERERRPRTRREREARSRGEE	7035
rpsC_lf.cluster1428	11	soilwarming_3_heated_60-80_052018_S30_6915_3	soilwarming_3_heated_60-80_052018_S30_6915	1	MGQKVHPYGFRLGYNKDWHSHWFAKKQYGDFLIEDLKLKAELKRRFTGAGVSHVDVERAANRLKIIIYTSRPGIIIGRKGSEIDKLKGDISSRTGREVLVSIQEIHKPELNAQLQAEKIAAQLEKRIAFRRAMRKAVEESLRFGAQGIKVKVSGRLNGAEIARSEWHLQGQLPLHTLRSDVDYGFAEAHTTFGVIGVKVWIYRGVILDANAAMARGTGTDPINDTRPGQREGRPRPQRPRRDRERTER	3965
rpsC_lf.cluster1429	3	Ga0480452_0091957_243_989	Ga0480452_0091957	1	LSVTKYFVKDVSRRLEIDEHLALELKRAGYSHVELTKSPVGTRVVIYAAKPGMVIGRRGQSIRDLTKVLEDKFHIENPQLSVANIEVPEQDPKVVASQVASALQRGVHFRRAAYWAIQRVMESQALGVEITIRGKLTTERSRFEKFKAGYLPRVGDPVLKSVKRAVADVQLKQGLFGINVRILPPQIDYIDKPIMLTPPAQTTPPAAPAKEAEPIAAPEVAVEIETPAEVAVVVENKEEEKTADSEKA	2149
rpsC_lf.cluster143	4	Ga0480585_0056117_792_1832	Ga0480585_0056117	1	MGQKIHPGGFRIGIIHDWKSNWFSEKEFGAYLIEDVRIRDHIRGKLSHAGLSDIHIRKDSQRITIDIYTARPGIVIGKSGSEVEALRQDVHAMTHKAVHVNINEIKRPELDANLVAQSVAEQLQNRVSFRRAMKRSLASAMRSGAQGVRIRCGGRLGGAEMSRTEQYSEGRVPLHTLRADIDYGFAEAQTQAGRIGVKVWINKGEIMPAGYEGAQQQTTRLGEVDARRRRGVTTITEDTGPSRPERGRRPGGGGGGPGGGGGGRPGGGGGRPGGGPGGGGGRPGGGGGRSGSGPGGRGQQTGPSGPSTPVGRRAPDRSAKPVAEAPPVAPPEDAPAPAAPPAEGGA	2023
rpsC_lf.cluster1430	4	Ga0577615_0241478_57_803	Ga0577615_0241478	1	VGQKVHPYGFRLGYNKDWHSHWYAKKQFGEFLLEDLKLKKDLKSRFAGAGVSHVDIERAANRLKIIIYTSRPGIIIGRKGAEIDKLKSDLSAKTGREVLVSIQEIHKPELNAQLQAEKIAAQLEKRIAFRRAMRKAVEESLRFGAQGIKVKVGGRLNGAEIARSEWHLQGQLPLHTLRADIDYGLAEAHTTFGIIGVKVWIYRGEILDPKAAMARGTGSDPINETRVGERERRPRTRREREARSRGEE	1982
rpsC_lf.cluster1431	17	Ga0577617_0073354_555_1301	Ga0577617_0073354	1	LSVTKYFIKDVSRRLEIDEHLALELKRAGYSHVELTKSPVGTRVVIYAAKPGMVIGRRGQSIRDLTKVLEDKFHIENPQLSVANIEVPEQDPKVVASQVASALQRGVHFRRAAYWAIQRVMESQALGVEITIRGKLTTERSRFEKFKAGYLPRVGDPVLKSVKRAVADVQLKQGLFGINVRILPPQIDYIDKPIMLTPPAQTTPPAAPAKEAEPVAAPEVAVEVETPAEVAVVVEDKEEEKTADSEKA	3427
rpsC_lf.cluster1432	1	Ga0577643_00325571_234_980	Ga0577643_00325571	1	LSVTKYFVKDVSRRLEIDEHLALELKRAGYSHVELTKSPVGTRVVIYAAKPGMVIGRRGQSIRDLTKVLEDKFHIENPQLSVANIEVPEQDPKVVASQVASALQRGVHFRRAAYWAIQRVMESQALGVEITIRGKLTTERSRFEKFKAGYLPRVGDPVLKSVKRAVADVQLKQGLFGINVRILPPQIDYIDKPIMLTPPAQTTPPAAPAKEAEPIAAPEVALEVDTPAEVAVVVENKEEEKTADSEKA	1959
rpsC_lf.cluster1433	1	Ga0577631_0447807_1_744	Ga0577631_0447807	1	MGQKIHPGGLRVGVIHDWKSNWYTGKKEFPQYILEDVRIREHIYKKLSHAGLSDILIRKDKQRITVDIYTARPGIVIGKSGVEVDALRRELHAITQKNVHININEIKRPELDAKLVAQSIAEQLSNRVAFRRAMKRALASAIRSGAAGVKIQCSGRLGGGEMSRRETYNEGRVPLHTIRADIDYGFVEARTSAGRIGVKVWINKGEIMPEGYEGVAQGDQRLGDQDTRRRRGGATEGLGASRESGRGR	1025
rpsC_lf.cluster1434	6	Ga0577620_0024520_2587_3333	Ga0577620_0024520	1	VGQKVHPEGFRVGYIHDWKSNWFNERDFADYLLEDIKIREHIEGKLGHAGLSDIRIRKNKNEVTVDIHTARPGIVIGKSGTEVDALRRDLHKMTSKQVRVNILEVKRPELDAKLVAQSIAEQLQNRVAFRRAMKRALTSAIRSGATGVRVQVSGRLGGSEMARTEGYSEGRVPLHTLRADIDYGLYEARTTFGRIGVKCWINKGEVMPEGYRTAENLDQDRQPDRSPPPRRRRENRPPGGGQDGRKRS	3963
rpsC_lf.cluster1435	1	Ga0577634_0406482_1_744	Ga0577634_0406482	1	VGQKVHPNAFRLGIYKPWQARWYGDKDYTDMLLEDMRMRRLILERLRNAGISKVETERSASQATVIIWTAKPGIVIGKGGASVDQLRDDLEKMTGKKVRVTIQEIKHPELDAMLVAQNVAAQLERRIAFRRAIKQSVLRTMRAGAKGVKIAVSGRLGGAEMSRREWDRDGRVPLHTLKANIDFGQTEARTTFGRIGVSVWVYLGDFDLTQPEESFEEIPARQLLEEARPAVVAAAAATDGAAAATDGA	1708
rpsC_lf.cluster1436	1	Ga0577630_0311755_497_1243	Ga0577630_0311755	1	MGQKTNPIGLRVAVTRDWRSKWYAGKKEFGKLLTEDRNIRELLKKKLESASVPQILIERAASRCRITILTARPGIVIGRKGAEIDKLKEELSKMTGKEIYVDILEIKTPELDAQLVAENVALQLERRVSFRRAMKKALQTAKDFGAEGIKIRCAGRLGGAELARVEQYHWGRVPLHTLRANIDYGFAEAKTVYGKLGVKCWVCKGEGAKAGLPPAPQPRPVVPEPSGANTLSGSAAPGGPSVAAAATN	1371
rpsC_lf.cluster1437	2	Ga0577630_0082826_1842_2585	Ga0577630_0082826	1	MERAGISKVEIERTRERVRVDIHTARPGIVIGRRGAEADRIRAELEKLTKKQVQLNILEVKNPESDAQLVAQSVAEQLSNRVAFRRAMRKAIQTAMRSAAVKGIKVQCSGRLGGAEMSRSEHYHEGRVPLHTLRADIDYGFFEARTTFGRIGVKVWIYKGEVVGGISARRERDAAADGRGAPRRERPDRPARPRRSGASGTTATSTEAGRAAAAEQADPSAVAPADNAAPTNSGPENTAPEAGNGEG	2610
rpsC_lf.cluster1438	6	Ga0577635_0147439_1026_1769	Ga0577635_0147439	1	VGQKTHPIGFRLGFTKTWNAKWFANKKNYPVLLKEDIGIRNAIRGRLRDAAIARIDIERSANQVTVTIQTAKPGVVIGKGGAKVEELRQVLGKMTGKMVKVNIFEIRYPELDSYLIAENVAQQLERRVSFRKVLKQTVQRSMKSGAKGVRVAVSGRLGGAEMSRREWEREGRVPLHTLRGDIEFGRATAKTTYGTIGVKAWVYKGEIEPAPRQVAQQNAPATAAPRPPAPPPPAPAPAATPQPARTS	2007
rpsC_lf.cluster1439	1	Ga0577638_1078826_390_1133	Ga0577638_1078826	1	VRDDAVNNTRHQESEGVTVGQKVHPIGFRLGFNKTWRSRWYAGRDYAKLLHEDLALRSTLKKRFAHAGVSKIETERAVNRLKIDIYTSRPGIIIGRKGTEVDKLKQEIQKKTSREVFINIQEIQKPELDAQLISESVAMQLEKRVAFRRAMRKAVESALRFGARGIKVRVSGRLNGAEIARSEWYLHGQLPLQTLRADIDYGFAEASTTYGQIGIKVWLYKGERLVPQRGREEEYRERAPRRPSARV	1134
rpsC_lf.cluster144	1	Ga0577626_0005570_8775_9815	Ga0577626_0005570	1	MGQKVHPGGMRVGVIHDWKSNWYTGKKEFPGYLIEDIKIREHIIGKLSHAGLSDILIRKDKQRITVDIYTARPGIVIGKSGVEVDALRKDLHAITKKNVHININEIKRPELDAKLVAQSIAEQLQNRVSFRRAMKRALASGIRSGAKGVRIQCGGRLGGTEMSRSEAYSEGRVPLHTIRADIDYGFVEAKTTFGRIGVKVWINKGEIMPEGYGGLDTEKDVRLGEQDQARRRRANVEGLGASRESGRDRQRDREGLGPVRPSRKRGGQGRGGGSGRGQGRSGRPAARSRGAAQQDTPERPRTDEQTAKPPVEPQAETTPAPVADAPETATPEPQTEDTTKQEKADQ	15055
rpsC_lf.cluster1440	4	soilwarming_unheated_45-60_052018_S4S9S14_102926_3	soilwarming_unheated_45-60_052018_S4S9S14_102926	1	MGQKVHPYGFRLGYNKDWHSHWFAKKQFGDFLIEDLKLKAELKRRFTGAGVSHVDVERAANRLKIIIYTSRPGIIIGRKGSEIDKLKGDISSRTGREVLVSIQEIHKPELNAQLQAEKIAAQLEKRIAFRRAMRKAVEESLRFGAQGIKVKVSGRLNGAEIARSEWHLQGQLPLHTLRSDVDYGLAEAHTTFGVIGVKCWIYRGQILDAKAAMARGTGTDPINDTRGPGQREGRQRPARARRERPER	1636
rpsC_lf.cluster1441	2	Ga0577626_0398763_322_1065	Ga0577626_0398763	1	MLNEDLKARAFLKKKLKNASVGRIVIERPAKNARFTIYSSRPGVVIGKKGEDIEVLKLALTKIMGVPVHVNIEEIRKPEIDSQLIADSISQQLEKRIMFRRAMKRAMQNAMRLGALGIKIMSSGRLNGIEIARKEWYREGRVPLHTLRADIDYGTSEASTTYGIIGVKVWVYKGDRAPNGDAPVIETPADEKKSRGPRRDDGKPAGRPRPAGAKPTPAGAPAGAVRARPAVKKPDAAAAAPAEKAGE	1696
rpsC_lf.cluster1442	12	Ga0577637_0112344_969_1712	Ga0577637_0112344	1	MGQKTHPIGFRLGFTKTWNAKWFANKKNYPVLLKEDIGIRNAIRGRLRDAAIARIDIERSANQVTVTIQTAKPGVVIGKGGAKVEELRQVLGKMTGKMVKVNIFEIRYPELDAYLIAENVAQQLERRVSFRKVLKQTVQRSMKSGAKGVRVAVSGRLGGAEMSRREWEREGRVPLHTLRGDIEFGRATAKTTYGTIGVKAWVYKGEIEPAPRQVTQTSAPAAAAQRPPAPPAPAPAPAPAAQPARVS	1714
rpsC_lf.cluster1443	3	Ga0577630_0021292_4144_4887	Ga0577630_0021292	1	MGQKVNPIGFRLGVIRTWDSKWYEEKNYAKWLHEDIKLREYVKKKLGAAGISRVDIERAANKVKVNVHTARPGIVIGKRGAGIEQIKKELQAFTSNEVFLNIVEVRKAETDAQLVAENITTQLERRIAFRRAMKKAIQTAQKFGAKGIRVACSGRLGGAEMARYEWYREGRVPLHTLRADIDYGFAEAKTTYGKIGCKVWIFRGEVLPESAEAKQVGGVRSTVPQRAPRATTPVTTGTGSSTPTPVQ	4904
rpsC_lf.cluster1444	1	Ga0577626_0337171_621_1364	Ga0577626_0337171	1	MGQKVNPFAIRLGITRDWVSKWYANKKQFPQHVYTDFRVRGFLKSKLADASVSRILIERAAKRVSITIQTARPGIVIGKKGEDIEKLRAETAKMLKLPPSDVRLNIAEIRKPELDAQLVADGIAQQIEKRVMFRRAMKRAVMSTMRSGALGVKVRLSGRLNGSEIARTEWAREGRVPLHTFRADIDYGLGEARTTYGVIGVKVWIFKGEVFDKAELAAQAAEVDAAQAAQGAAANAAAAAAGPTPIA	1868
rpsC_lf.cluster1445	1	Ga0577638_0074720_679_1422	Ga0577638_0074720	1	MGQKVNPLGIRLGITRDWTSKWYAGKKQFPLQVHTDFRVRRFLRSRLAEASVSRIHIERAAKKVNITIQTARPGIVIGKKGEDIEKLRQETAKLLGMAVSDVRLNIAEIRKPELDAQLVADSIAQQIEKRVMFRRAMKRAVMSTMRSGALGVKVRVSGRLNGSEIARTEWYREGRIPLHTFRADIDYGLSESMTTYGVIGVKVWIFKGEVFDKVEVEQAPAESEAAPVAVAPAAQAPAPAVEAAPQA	4909
rpsC_lf.cluster1446	2	soilwarming_2_heated_10-30_052018_S22_14_9	soilwarming_2_heated_10-30_052018_S22_14	1	MGQKVHPYGFRLGYNKDWHSHWFAKKQYGDFLIEDLKLKAELKRRFTGAGVSHVDVERAANRLKIIIYTSRPGIIIGRKGSEIDKLKGDISSRTGREVLVSIQEIHKPELNAQLQAEKIAAQLEKRIAFRRAMRKAVEESLRFGAQGIKVKVSGRLNGAEIARSEWHLQGQLPLHTLRSDVDYGFAEAHTTFGVIGVKVWIYRGVILDANAAMARGTGTDPINETRGPGQREGRPRPQRPRRERTER	131738
rpsC_lf.cluster1447	1	Ga0577640_0122565_1276_2019	Ga0577640_0122565	1	LSVTKYFVKDVSRRLEIDEHLALELKRAGYSHVELTKSPVGTRVVIYAAKPGMVIGRRGQSIRDLTKVLEEKFHIENPQLSVANIDVPEQDPKVVASQVSQALQRGVHFRRAAYWAIQRVMESQALGVEITIRGKLTTERSRFEKFKAGYLPRVGDPVLKSVKTAVADVQLKQGLFGINVRILPPQIDYIDKPIMLNPPAETQRAVAAPVKEAEPVVASEVVVEVEVPAGPVAVVVEDKEDEETGDS	2044
rpsC_lf.cluster1448	2	Ga0577643_00249131_1250_1993	Ga0577643_00249131	1	MGQKVNPLGIRLGITRDWTSKWYAGKKQFPQQVFTDFRVRGFLRSRLSEASVSRIHIERAAKKVNITIQTARPGIVIGKKGEDIEKLRFETAKLLGMPVTDVRLNIAEIRKPELDAQLVADSIAQQIEKRVMFRRAMKRAVMSTMRSGALGVKVRVSGRLNGGEIARTEWYREGRIPLHTFRADIDYGLSESRTTYGVIGVKVWIFKGEVFDKVQVEQAPAEGEAAQGAPAQAPQAPAAPAEAAAQA	2238
rpsC_lf.cluster1449	4	Ga0577631_0345424_5_748	Ga0577631_0345424	1	MGQKVNPLGIRLGITRDWTSKWYAGKKQFPQQVFTDFRVRGFLRSRLSEASVSRIHIERAAKKVNITIQTARPGIVIGKKGEDIEKLRLETAKLLGMPVIDVRLNIAEIRKPELDAQLVADSIAQQIEKRVMFRRAMKRAVMSTMRSGALGVKVRVSGRLNGGEIARTEWYREGRIPLHTFRADIDYGLSESRTTYGVIGVKVWIFKGEVFDKVQVEQAPAEGEAAQGAPAQAPAAPAAPAEAAAQA	1183
rpsC_lf.cluster145	10	Ga0577642_0412022_229_1269	Ga0577642_0412022	1	VGHKVHPNAFRLGPFRSWEANWFATEKDYTKLLHEDLDMRRLILSRLRNAGIARIETERSSNAQMTVTIHTAKPGIVIGKGGASVDQLREDLEKRFGNRVRISIQEIKQPELDAQLVAENIASQIERRISHRRAMKQSILRTMRAGAKGVRIGMAGRLRGGEMARRESDHEGKVPLHTLRADIKFGRATARTTYGVIGVKVWIYKDLMKSRTRGGQQQEDLYPQPQSEGRQPAPERAEASSTAAVSAGTRAESPAVDPGAPAAAGQTVRQQASGEREGRSQRRRSPRAEGSGAAARPPAPRPAPRDQAPERSVTPQEGVPHDESTEKGTQPEPGSPAAEEDSGAPS	1339
rpsC_lf.cluster1450	1	Ga0577642_0448119_533_1276	Ga0577642_0448119	1	TIHAAKPGIVIGKSGVKVEELRRTLEAMTQKRIRVTIQEIRQPEIDAFLVARSIADQLEKRVAFRRAMKQAVQRAQRFGAKGVRVQVSGRLGGSEMSRREWDRWGRVPLHTLRADIDYGQTEAHTTYGIIGVKVWIYRGDFTPDGRSPEEVAAEQRQPDRRGPRATVRAEVPEAPAAEVAAPAVPAEVDYSTGGVFDPGEESGEIRPRGARESEAAPPAAPQPPTTPARPAPTPPTRPMPPTPRTEE	1276
rpsC_lf.cluster1451	2	soilwarming_1_heated_10-30_052018_S17_5658_4	soilwarming_1_heated_10-30_052018_S17_5658	1	TKTWNAKWFAESKTYRVLLKEDIAIRSTIRGRLRDAAIARIDIERSTNQVTVTIQTAKPGVVIGKGGAKVEELRQALGKATGKAVKVNIFEIRYPELDANLIAENVAQQLERRVSFRKVLKQTVSRSMKAGAKGVRVAVAGRLGGAEMSRREWEREGRVPLHTLRADIEFGRAIAKTTYGTIGVKAWVYRGDIEPAPRQVSQNAPAAAARPAALGAPSLGGPAPVGAPAPVAAPVAAPAPAGPVGTA	1506
rpsC_lf.cluster1452	2	Ga0577632_0546363_82_825	Ga0577632_0546363	1	MGQKVNPLGIRLGITRDWTSKWYAGKKQFPQHVFTDWRVRGFLRSRLAEASVSRIQIERAAKKVNITIQTARPGIVIGKKGEDIEKLRQETAKLLGMSVGDVRLNIAEIRKPELDAQLVADSIAQQIEKRVMFRRAMKRAVMSTMRSGALGVKVRVSGRLNGGEIARTEQYREGRIPLHTFRADIDYGLSESHTTYGVIGVKVWIFKGEVFDKAQIEQAAAEGEAAQGAAPAAAAPQAAPAEAAAQA	1132
rpsC_lf.cluster1453	3	Ga0577636_0142274_240_983	Ga0577636_0142274	1	LSVTKYFIKDVSRRLEIDEHLALELKRAGYSHVELTKSPVGTRVVIYAAKPGMVIGRRGQSIRDLTKVLEEKFHIENPQLSVANIDVPEQDPKVVASQVSQALQRGVHFRRAAYWAIQRVMESQALGVEITIRGKLTTERSRFEKFKAGYLPRVGDPVLKSVKTAVADVQLKQGLFGINVRILPPQIDYIDKPIMLNPPAETQPAVAAPAKEAEPVVASEVVVEGEVPAGPVAVVVEDKEEEETGDS	1546
rpsC_lf.cluster1454	1	Ga0577643_00448378_2_742	Ga0577643_00448378	1	MGQKVNPYGFRLGITTDWKSRWFNDREYQSLVIEDWKIRNYLMTELERAAVSRVEVERTRDRLRVEVFTARPGIVIGRRGAEADRLREGLARITGNVKVQLNITEIKQPELDAALIAQGIADQVSARVNFRRAMKRAVQTVQKAGAQGIRVQCAGRLGGSEMSRKEFYREGRVPLHTLRADIDYGLREAKTTYGRIGVKVWIYKGDILPYKVSAEEKISKEAAMATGGTSGQGGARRVITAGGGLLG	1664
rpsC_lf.cluster1455	1	soilwarming_heated_10-20_052016_S40S43S46_66485_1	soilwarming_heated_10-20_052016_S40S43S46_66485	1	IRLGITRDWTSRWYAGKRQFPLHVHTDFRVREFLKKRLAEASVSRILIERAAKKVNITIQTARPGIVIGKKGEDIEKLRQETAGLLGMPMNDVRLNIAEIRKPELDAQLVGDSIAQQIEKRVMFRRAMKRAVMSTMRSGALGVKVRVSGRLNGSEIARTEWYREGRIPLHTFRADIDYGLSEANTTYGVIGVKVWIFKGEVFDKSELAQQAAEGEVAAAPSTPVAPAAPPPVTPPAPEVAARSDLMA	1333
rpsC_lf.cluster1456	1	Ga0577615_0230941_1286_2029	Ga0577615_0230941	1	SSVDQLREDLEKRFGNRVRISIQEIKQPELDAQLVAENIASQIERRISYRRAMKQSILRTMRAGAKGVRVALGGRLRGSEMARREWDREGRVPLHTLRADIMFGRATARTTFGVIGVKCWIYKDNFVIAPRGGAQGLEELAPQPAVAAGAPAEVEAPAAPVEVAQPVAEVAAPPAPAEVAEPVAAAVAPAEVAAPAAEPVVEPVATEPEAVVAEEVKAAEPAKAPRKRATTKKTATPKAESEGDASS	2029
rpsC_lf.cluster1457	2	Ga0577633_0174584_1711_2451	Ga0577633_0174584	1	LSVTKYFVKDVSRRLEIDEHLALELKRAGYSHVELTKSPVGTRVVIYAAKPGMVIGRRGQSIRDLTKVLEEKFHIENPQLSVANIEVPEQDPKVVASQVSQALQRGVHFRRAAYWAIQRVMESQALGVEITIRGKLTTERSRFEKFKAGYLPRVGDPVQKSVKTAVTDVQLKQGLFGINVRILPPQIDYIDKPIMLTPPAQTTPPPVTPVKEAEPAAPAVVVEVETQAGDVAVVVEDKEEEKTGDS	2524
rpsC_lf.cluster1458	5	Ga0577633_0267271_913_1653	Ga0577633_0267271	1	MGQKVNPLGIRLGITRDWTSKWYASKKQFPQHVYTDFRVRGFLRSRLSEASVSRIQIERAAKKVNITIQTARPGIVIGKKGEDIEKLRLETARLLGMAVNDVRLNIAEIRKPELDAQLVADSIAQQIEKRVMFRRAMKRAVMSTMRSGALGVKVRVSGRLNGGEIARTEQYREGRIPLHTFRADIDYGLSESHTTYGVIGVKVWIFKGEVFDKAQIEAAVAEGEPAQGAPPAQAPAAPVAEAPAQA	1998
rpsC_lf.cluster1459	2	Ga0577626_0734833_418_1158	Ga0577626_0734833	1	VTIHTAKPGIVIGKGGASVDQLREDLEKRFGNRVRISIQEIKQPELDAQLVAENIASQIERRISYKRAMKQAILRTMRSGAKGVRIYCGGRLRGAEMARREWDREGRVPLHTLRANIDFGRATASTTFGAIGVKCWIYKDVAAPLRKQPVATDATAPIAEIAPQPELAAVLAEPQAPIAIAAPEPEAATPAPKRARATTAAEPKPKAEPKPKAEAKAEPKAKAAPKAKAEVKAPAKKTTTTKKTKS	1179
rpsC_lf.cluster146	3	soilwarming_3_unheated_10-30_052018_S12_1995_10	soilwarming_3_unheated_10-30_052018_S12_1995	1	MGQKVHPGGMRVGVIHDWKSNWFAGTKEFPEALLEDIKIREHIYNKLSHAGLSDVLIRKDKQRITIDIYTARPGIVIGKSGAEVDALRKEIHSMTHKNVHININEIKRPELDAKLVAQSIAEQLQNRVSFRRAMKRSLASAMRSGAHGVKVQCGGRLGGTEMSRSESYSEGRVPLHTIRADIDYGFVEAKTTFGRIGVKVWINKGEIMPEGFESVAVQKETRLGDQDTARRLGGRTEGLSASRESGRSRAADREGLGPVQKRRPKRGARRRPRNEDESSPREEPGQPEAEPKVDDAPAAEVAQPEVEVKVEEAAPAAEAKPKAKAKAKPKAKPKAAEEPKKGDES	5506
rpsC_lf.cluster1460	1	Ga0577628_0081975_157_897	Ga0577628_0081975	1	MGQKVHPIGFRLGISTDWKSRWYADKLYKDYISEDVKIRKMMSKGLERAGISKVEIERTRDRVRIDIHTARPGIVIGRKGAEADRIRGNLEKLTGKQVQLNILEVKSPESDAQLVAQGVAEQLSSRVSFRRAMRKAMQSAMKNTLVKGIRVQVSGRLGGAEMSRREWEREGRVPLHTLRGDIEFGRATAKTTYGTIGVKAWVYKGEIEPAPRQVTQTNAPAAAAQRPPAPPAPPAPAAAPQPARAT	2022
rpsC_lf.cluster1461	4	Ga0577630_0000554_27318_28058	Ga0577630_0000554	1	VPGVGWYENLANTQHPTPNTRSGGIVGQKVHPYGFRLGFNRGWHSNWIAKRDYADLLHEDLKLKKELKSRFAGAGVSNIDVERAANKLKIIIHTSRPGIIIGRKGAEIDKLKQEIKERTGREVYVNIQEIHKPELNAQLQAEQIAQQLEKRIAFRRAMRRAVENAQRFGAQGIKVRVSGRLNGAEIARSEWYLQGRLPLHTLRADIDYGFAEAHTTFGVIGVKVWIYRGDELTIKRAVAARRPQQQ	29774
rpsC_lf.cluster1462	14	Ga0577620_0012435_3273_4013	Ga0577620_0012435	1	VGQKTHPIGFRLGFTKTWNAKWFANKKNYPVLLKEDIGIRNAIRGRLRDAAIARIDIERSANQVTVTIQTAKPGVVIGKGGAKVEELRQVLGKMTGKMVKVNIFEIRYPELDAYLIAENVAQQLERRVSFRKVLKQTVQRSMKSGAKGVRVAVSGRLGGAEMSRREWEREGRVPLHTLRGDIEFGRATAKTTYGTIGVKAWVYRGEIEPAPRQVTQTNAPAAQPQRPPAPPPVPAAAPAPQPVRAS	5426
rpsC_lf.cluster1463	18	soilwarming_1_unheated_10-30_052018_S2_5696_2	soilwarming_1_unheated_10-30_052018_S2_5696	1	MGQKTHPIGFRLGFTKTWNAKWFANKKNYPVLLKEDIGIRNAIRGRLRDAAIARIDIERSANQVTVTIQTAKPGVVIGKGGAKVEELRQVLGKMTGKMVKVNIFEIRYPELDAYLIAENVAQQLERRVSFRKVLKQTVQRSMKSGAKGVRVAVSGRLGGAEMSRREWEREGRVPLHTLRGDIEFGRATAKTTYGTIGVKAWVYKGEIEPAPRQVTQTSAPAAAPQRPPTPPAPPPAPAVPQPARVG	2283
rpsC_lf.cluster1464	1	Ga0506675_0106922_172_912	Ga0506675_0106922	1	VGQKVHPIGYRLGFTKTWNAKWFAEAKNYRILLKEDIAIRNTIRGRLRDAAIARIDIERSTNQVTVTIQTAKPGVVIGKGGAKVEELRQALGKATGKVVKVNIFEIRYPELDANLIAENVAQQLERRVSFRKVLKQTVSRSMKAGAKGVRVAVAGRLGGAEMSRREWEREGRVPLHTLRADIEFGRAIAKTTFGTIGVKAWVYRGDIEPAPRQVSQNAPAAAARPAVLGAPAAGIAPVASGPVGTP	1924
rpsC_lf.cluster1465	11	Ga0577621_0065745_1147_1887	Ga0577621_0065745	1	VGQKTHPIGFRLGFTKTWNAKWFANKKNYPVLLKEDIGIRNAIRGRLRDAAIARIDIERSANQVTVTIQTAKPGVVIGKGGAKVEELRQVLGKMTGKMVKVNIFEIRYPELDAYLIAENVAQQLERRVSFRKVLKQTVQRSMKSGAKGVRVAVSGRLGGAEMSRREWEREGRVPLHTLRGDIEFGRATAKTTYGTIGVKAWVYKGEIEPAPRQVTQTNAPAAAAQRPPAPPAPPAPAAAPQPARAT	2803
rpsC_lf.cluster1466	7	Ga0480585_0001458_5742_6482	Ga0480585_0001458	1	MGQKVNPLGIRLGITRDWTSRWYAGKKQFALNLHTDFRVRQFLKDRLREASVSRILIERAAKKVNITIQTARPGIVIGKKGEDIEKLRQETAKLLTIPISDVRINIAEIRKPELDAQLVGDSIAQQIEKRVMFRRAMKRAVMSTMRSGALGVKVRVSGRLNGGEIARTEQYREGRIPLHTFRADIDYGLSEAHTTYGIIGVKVWIFKGEVFDKVQAAEPAVAEGEAAQAAPAVAAPVAAVEAPAQA	8479
rpsC_lf.cluster1467	1	Ga0480455_00000155_41044_41784	Ga0480455_00000155	1	MSVTNYFIKDVSRRLEIDEHLALELKRAGYSKVELTKSPVGTRVVIYAAKPGMVIGRRGQSIRDLTKVLEEKFHIENPQLSVAAIEIPEQDPKVVAQQVAQALQRGVHFRRSAYWAIQRVMESGAAGVEITIRGKLTTERSRYEKFRAGYLPRVGDPVLKNLKTAVADVQLKQGLFGINVRILPPNIDFLDKPLMKKQEPAPPTKQKTEPAAAEPQTIITTPTPTPDQENQKLSTEGEKIANTQKA	47541
rpsC_lf.cluster1468	1	Ga0577643_00279243_1_741	Ga0577643_00279243	1	SSDPQCRRRADQTRIYINTAKPGIIIGKRGAGIEDLKKKLEKVSGHPVNVNVVEIKHPELDAKLVANNIIDQLEKRIAFRRAMRQAIQRTMRAGARGIKVQCGGRLGGAEIARVERNFEGKVPLHTLRANVDYAQVEAYTTFGRIGVKVWIYLGEVLPDGKPKVEARDIRPLAARRTRPPRATRPAEAPPSEEAAPTVEASSTAAASAPEKPVAEPESPAGADSMAALLAEMPPPAEAKPEDEEST	2116
rpsC_lf.cluster1469	2	Ga0480584_0226390_254_994	Ga0480584_0226390	1	MGQKVNPLGIRLGITRDWTSKWYASKKQFPQHVYTDFRVRGFLRSRLSEASLSRIQIERAAKKVNITIQTARPGIVIGKKGEDIEKLRLETAKLLGMAVNDVRLNIAEIRKPELDAQLVADSIAQQIEKRVMFRRAMKRAVMSTMRSGALGVKVRVSGRLNGGEIARTEQYREGRIPLHTFRADIDYGLSESHTTYGVIGVKVWIFKGEVFDKVQVEEAVAEGEAAQGAPPAQAPAAPVAEAPAQA	1096
rpsC_lf.cluster147	2	Ga0577643_00445744_635_1669	Ga0577643_00445744	1	LGHKVHPNAFRLGVFRPWEANWFANPKDYTKMLHEDLEMRRVILARLRNAGIAKIETERSSNAQLTVTIHTAKPGIVIGKGGASVDQLREDLEKRFGNRVRISIQEIKQPELDAQLVAENIASQIERRISYKRAMKQAILRTMRAGAKGVRIYCGGRLRGAEMARREWDREGRVPLHTLRANIDFGRATASTTFGAIGVKCWIYKDVAVPLKKQPVADGAPIADAISIAPQPEAPEPAAEPQVAVAVAAKRPEAVATEAAPKRTRVAAKPATETAAAVPEPKARAPKAKAAAAPAKAQAKVTTAVRPAPKPKAAAKAKAAEPKAAAKAKPAPPRAKRAGTPKDKS	1669
rpsC_lf.cluster1470	2	Ga0577615_0006648_12_752	Ga0577615_0006648	1	MMSKGLERAGIAKVDIERTRDRVRVDIHTARPGIVIGRKGAEADRIRGELEKLTGKQVQLNIIEVKSPESDAQLVAQGVAEQLSSRVSFRRAMRKAMQSAMKNPLVRGIRVQVSGRLGGAEMSRTEFYREGRVPLHTLRANIEYGFFEARTTFGRIGVKVWIYKGDAVPGREAPAEAAPPRGRRERGDRAERPRRGRSGSSGTTAGGTEAGRAAAAAHAAGAEKPAESNVAAPAEQAAPAETQQEG	9475
rpsC_lf.cluster1471	4	soilwarming_2_heated_10-20_052016_S43_505_2	soilwarming_2_heated_10-20_052016_S43_505	1	MGQKVNPLGIRLGITRDWTSRWYAGKKQFPLHVHTDFRVREFLKEKLHEASVSRIQIERAAKKVNITIQTARPGIVIGKKGEDIEKLRQETAKLLGMSVSDVRINIAEIRKPELDAQLVGDSIAQQIEKRVMFRRAMKRAVMSTMRSGALGVKVRVSGRLNGGEIARTEWYREGRIPLHTFRADIDYGLSEALTTYGIIGVKVWIFKGEVFDKVELAQPVVAEGEAVQAAPAVAAPAAAVEAPAQA	6883
rpsC_lf.cluster1472	1	Ga0577631_0019830_3774_4514	Ga0577631_0019830	1	MDAKLVAENVASQLEKRIAFRRAIKQSIMRTMRAGARGVRIQVSGRLGGSEMSRREWDRDGRVPLHTLRANIDYGIAEARTTFGRIGVQVWIYKGDFVTATGEPIPADGAQRTPSQRDEENGGALITEAPAGAAPRGRRAAATPVVAAPAPEQPEAAVAAAPPEVAEAGAAVLTDTEAETETETDVDTVDVDDAIAADADDSDTDTDTAPKRVPVKRKATTTRKPTTARKPATKAKDAPAAEAEEE	4524
rpsC_lf.cluster1473	2	Ga0577642_0115183_1584_2324	Ga0577642_0115183	1	MGQKVHPVGYRLGFTKTWNAKWFAEAKTYRTLLKEDIAIRTTIRSRLRDAAIARIDIERSTNQVTVTIQTAKPGVVIGKGGAKVEELRQALGKATGKVVKVNIFEIRYPELDANLIAENVAQQLERRVSFRKVLKQTVSRSMKAGAKGVRVAVAGRLGGAEMSRREWEREGRVPLHTLRADIEFGRAIAKTTFGTIGVKAWIYRGDIEPAPRQVSQNAPAAAARPAVLGAPAPVGAPVASGPVGTT	2621
rpsC_lf.cluster1474	3	Ga0577630_0061509_1143_1883	Ga0577630_0061509	1	MGQKVNPIGLRLGINRTWDSRWFAGKGEYAKLMHEDVAIRAALMKQLKQAAVSKIVIERPHRKCRVTIHSGRPGVVIGKKGADIEKLRKLVGTMTKADVTINIVEVRKPEIDATLVADSIAQQLERRVAFRRAMKRAVQSAMRLGAEGIRINCSGRLGGAEIARQEWYREGRVPLHTLRADVDYGTATAFTTYGTCGIKVWVFKGEILEHDPMAQDKKAQEEGGRSGGRRERDGEGGRERGRRDHA	3001
rpsC_lf.cluster1475	5	Ga0480455_00013133_8247_8987	Ga0480455_00013133	1	MGQKVNPLGIRLGITRDWTSRWYAGKKQFALNLHTDFRVRQFLKDRLREASVSRILIERAAKKVNITIQTARPGIVIGKKGEDIEKLRQETAKLLAIPISDVRINIAEIRKPELDAQLVGDSIAQQIEKRVMFRRAMKRAVMSTMRSGALGVKVRVSGRLNGGEIARTEQYREGRIPLHTFRADIDYGLSEAHTTYGIIGVKVWIFKGEVFDKVQVAEPAVAEGEAAQAAPTVAAPVAAVEAPAQA	9154
rpsC_lf.cluster1476	1	Ga0480584_0135542_202_942	Ga0480584_0135542	1	MGQKVNPIGIRLGITRDWTSKWYASKKQFPLLVHTDFRVREFLKKKLADASVSRILIERAAKKVNITIQTARPGIVIGKKGEDIEKLRGETAKLLGMAMLDVRLNISEIRKPELDAQLVAESISQQIEKRVMFRRAMKRAVMSTMRSGALGVKVRVSGRLNGGEIARTEQYREGRIPLHTFRADIDYGLSEAHTTYGIIGVKVWIFKGEVFDKVQAAEPAVAEGEAAQAAPAVAAPVAAVEAPAQA	1445
rpsC_lf.cluster1477	9	Ga0577617_0296526_365_1102	Ga0577617_0296526	1	VGQKTHPIGFRLGFTKTWNAKWFANKKNYPVLLKEDIGIRNAIRGRLRDAAIARIDIERSANQVTVTIQTAKPGVVIGKGGAKVEELRQVLGKMTGKMVKVNIFEIRYPELDAYLIAENVAQQLERRVSFRKVLKQTVQRSMKSGAKGVRVAVSGRLGGAEMSRREWEREGRVPLHTLRGDIEFGRATAKTTYGTIGVKAWVYKGEIEPAPRQVTQTSAPAAAPQRPPTPPAPAPAPVPQPARAS	1689
rpsC_lf.cluster1478	1	Ga0577622_0018831_2_739	Ga0577622_0018831	1	HTAKPGIVIGKGGASVDLLREDLEKKFGNRVRISIQEIKQPELDAQLVAENIASQIERRISHRRAMKQSILRTMRAGAKGVRIALGGRLRGAEMARRESDREGRVPLHTLRADIQFGRATAKTTFGMIGVKVWINRDLIKVRPRGGETQEPIAPQPTEAAAQAAVAQAAAQAAQGGGQRGQGQGGGGQRGPRRRGGRRSGGGGGGGGQGGQGGPSGGGGGQSAPREQSAPSQSQNPPQGGANAPA	4673
rpsC_lf.cluster1479	3	Ga0480588_0000587_3601_4338	Ga0480588_0000587	1	MGQKVNPLGIRLGITRDWMSKWYAGKRQFPQHIHTDFRVREFLQQRLHDASVSRIQIERAAKKVNITIQTARPGIVIGKKGEDIEKLRQETAKLLGMTVNDVRLNIAEIRKPELDSKLVADSIAQQIEKRVMFRRAMKRAVMSTMRSGALGVKVRVSGRLNGSEIARTEWYREGRIPLHTFRADIDYGLSEAQTTYGVIGVKVWIFKGEVFDKPKVEQSVNTGEAAEAAPAVAAPAAAPVEQPSA	19240
rpsC_lf.cluster148	4	Ga0577618_0044359_813_1850	Ga0577618_0044359	1	MGQKVHPESLRVGYIHDWKSNWFNERHFADYLHEDTQIRAHIIGRLAHAGLSDITIRKNATEVEVNINTARPGIVIGKSGSEVDQLRRDLHRITGKQVKVNILEIKRPELDARLVAQSIAEQLQNRVAFRRAMKRALTSAMRSGAKGVKVQVSGRLGGAEMARTEGYSDGRVPLHTLRADIDYGFHEARTTFGRIGVKCWINKGEIMPEGYTGADLTIMDEPPPQAPDRGARDGRGGRDGRGGRDGRGRGGGPGGAGGRGGGPGGRGGGPGGRGGFGGAGGGGGRGGGPGGRGGFGGGGGGGGRGGSGGPGGGRGPRGGGRGGSGGGGGGSAGGGAGNGPGRSGR	5068
rpsC_lf.cluster1480	4	Ga0577618_0326904_716_1453	Ga0577618_0326904	1	MGQKVNPLGIRLGITRDWTSRWYAGKKQFPLHVYTDFRVRKFLTTKLHEASVSRIQIERAAKKVNITIQTARPGIVIGKKGEDIEKLRQETAKLLSMAVSDVRINIAEIRKPELDSQLVADSIAQQIEKRVMFRRAMKRAVMSTMRSGALGVKVRVSGRLNGSEIARTEWYREGRIPLHTFRADIDYGLSEAHTTYGIIGVKVWIFKGEVFDKVELAQPAAEGEAQAAAPGATAPAAATEAPAQA	1821
rpsC_lf.cluster1481	3	Ga0577618_0002840_8354_9091	Ga0577618_0002840	1	VGQKTHPIGFRLGFTKTWNAKWFANKKNYPVLLKEDIGIRNAIRGRLRDAAIARIDIERSANQVTVTIQTAKPGVVIGKGGAKVEELRQVLGKMTGKMVKVNIFELRYPELDAYLIAENVAQQLERRVSFRKVLKQTVQRSMKSGAKGVRVAVSGRLGGAEMSRREWEREGRVPLHTLRGDIEFGRATAKTTYGTIGVKAWVYKGEIEPGPRPGTQARAPGAAPQRPPAPPAPAPAPVPQPARVG	16108
rpsC_lf.cluster1482	2	Ga0577634_0069774_1636_2373	Ga0577634_0069774	1	VGQKTHPIGFRLGFTKTWNAKWFANKKNYPVLLKEDIGIRNAIRGRLRDAAIARIDIERSANQVTVTIQTAKPGVVIGKGGAKVEELRQVLGKMTGKMVKVNIFELRYPELDAYLIAENVAQQLERRVSFRKVLKQTVQRSMKSGAKGVRVAVSGRLGGAEMSRREWEREGRVPLHTLRGDIEFGRATAKTTYGTIGVKAWVYKGEIEPAPRQVTQTSAPVAAPQRPPAPPAPAPAPVPQPARVG	4332
rpsC_lf.cluster1483	119	soilwarming_heated_10-30_052018_S17S22S27_9657_1	soilwarming_heated_10-30_052018_S17S22S27_9657	1	CAPCSQSVDREASAPEEGKEVMGQKTHPYGFRLGYNKPHKSRWYADKDYADLLHEDVKLRKELKEKLKSAGISSIDIERAANKLVVRIYTARPGIIIGRKGAEIDKLKQDVQKRTKREVHIDILEVHRPELDAQLVAESIALQLEKRVAFRRAMRKAVDSALRFGCKGIKVRVAGRLNGAEIARKEWYLQGRLPLQTLRADIDYGTAEANTTYGVIGVKCWVYQGENVPKKASKIQKERETVAAA	1480
rpsC_lf.cluster1484	6	Ga0480588_0010551_2102_2839	Ga0480588_0010551	1	VGQKVHPYGFRLGFNKTWKSRWFAGKDYANLLHEDLDLKKDLKKRFQHAGVAKIEIERAANKLKIDIHTSRPGIIIGRKGQEVDKLKQEIQKRTNREVFINIQEIQKPELDAQLVGESVAMQLEKRVAFRRAMRKAVESALRFGARGIKVRVSGRLNGAEIARSEWYLHGQLPLQTLRADIDYGFAEANTTYGKIGVKVWLYKGERLTPRTGREEEFGSGGRDRDRDRDRGPRRPAGGDRPGARG	5612
rpsC_lf.cluster1485	1	Ga0577638_1160688_3_737	Ga0577638_1160688	1	MGQKVHPESLRVGYIHDWKSNWFNERHFADYLHEDTQIRGHIIGRLSHAGLSDITIKKNATEVEINIHTARPGIVIGKSGSEVDQLRRDLHRITGKQVKVNILEIKRPELDARLVAQSIAEQLQNRVAFRRAMKRALTSAMRSGAKGVKVQVSGRLGGAEMARTEGYSDGRVPLHTLRADIDYGFHEARTTFGRIGVKCWINKGEIMPEGYTGADLTIMDEPPPQAPDRGARDGRGGRDGRGGRD	1082
rpsC_lf.cluster1486	4	Ga0480586_0019536_2112_2849	Ga0480586_0019536	1	VGQKTHPIGFRLGFTKTWNAKWFANKKNYPILLKEDIGIRNAIRGRLRDAAIARIDIERSANQVTVTIQTAKPGVVIGKGGAKVEELRQVLGKMTGKMVKVNIFEIRYPELDAYLIAENVAQQLERRVSFRKVLKQTVQRSMKSGAKGVRVAVSGRLGGAEMSRREWEREGRVPLHTLRGDIEFGRATAKTTYGTIGVKAWVYKGEIEPAPRQVTQTSAPSAAPQRPPAPPAPPVAPAPQPARAT	2939
rpsC_lf.cluster1487	1	Ga0480588_0049636_1_738	Ga0480588_0049636	1	EYVKEDVEIRKMLSKGMERAGISKVEIERTRDRVRVDIHTARPGIVIGRRGAEADRIRGQLEKLTKKQVQLNILEVKNAESDAQLVAQGVAEQLSNRVAFRRAMRKAIQSAMRSPQVKGIRVQCSGRLGGAEMSRSEFYREGRVPLHTLRADIDYGLFEARTTFGRIGVKVWIYKGDVVGGRREGTPAAAPNADRAPRRERPQRRRSGASGTTATSTEAGRAAAEQSSGGGTATATAEPETGGES	2682
rpsC_lf.cluster1488	1	Ga0577638_1092307_390_1124	Ga0577638_1092307	1	MGQKVHPESMRVGYIHDWKSNWFSERHFASYLEEDIRIREHITRKLAHAGLSDITIRKDANALEVNIHTARPGIVIGKSGSEVDALRRDLHRLTHKQIKVNILEIKRPELDAKLVAQSIAEQLQNRVAFRRAMKRALTSAMRSGAKGVKVQVSGRLGGAEMARTESYSDGRVPLHTMRADIDYGFYEARTTFGRIGVKCWINKGEIMPEGYTGSDLTDINQPPPPGAERDRGGRDRRERGGRGGR	1125
rpsC_lf.cluster1489	2	Ga0480586_0000018_41211_41948	Ga0480586_0000018	1	MGQKIHPGGFRVGYIQNWKSNWFDEKGFADVLEEDLKIRTHIEGKLAHAGLSSITIERRGEVSVDIHTARPGIVIGKSGSEVDALRKELHKLTGKPVKVNIREVKRPELDAKLVAQSIAEQLQNRVAFRRAMKRALTSAMRSGAKGVKLQVSGRLGGSEMARTESYSDGRVPLHTLRANIDYGFFEARTTAGRIGVKCWINKGEVMPEGFRSDQVPADGEPQSVQQRGGRPGDRGRGGRGGGGGR	82499
rpsC_lf.cluster149	5	Ga0577626_0016176_3131_4168	Ga0577626_0016176	1	MGQKIHPGGFRIGIIHDWKSNWFSEKEFGAYLIEDVRIREHIRGKLSHAGLSDIHIRKDSQRITIDIYTARPGIVIGKSGSEVEALRQDVHAMTHKAVHVNINEIKRPELDANLVAQSVAEQLQNRVSFRRAMKRSLASAMRSGAQGVRIRCGGRLGGAEMSRTEQYSEGRVPLHTLRADIDYGFAEAQTQAGRIGVKVWINKGEIMPAGYEGAQQQTTRLGEVDARRRRGVTTITEDTGPSRPERRRGPGGGGGPGGGGGGGGGGGGGRPGGGGGGRPGGGPGGGRGGRPGGQQTGPSGPSTPQGRRAPVRPAPAPPEAEATPVAPPVEAPAPEAPAAPQEGEA	9000
rpsC_lf.cluster1490	4	Ga0577616_0088257_655_1392	Ga0577616_0088257	1	MGQKTHPIGFRLGFTKTWNAKWFANKKNYPVLLKEDIGIRNAIRGRLRDAAIARIDIERSANQVTVTIQTAKPGVVIGKGGAKVEELRQVLGKMTGKMVKVNIFEIRYPELDAYLIAENVAQQLERRVSFRKVLKQTVQRSMKSGAKGVRVAVSGRLGGAEMSRREWEREGRVPLHTLRGDIEFGRATAKTTYGTIGVKAWVYKGEIEPAPRQVTQTNAPAAAAQRPPAPPAPAPAPVPQPARVT	2399
rpsC_lf.cluster1491	2	Ga0577631_0001345_5147_5884	Ga0577631_0001345	1	MGQKVNPLGIRLGITRDWTSKWYAGKKQFPAQVFTDFRVRRFLRARLSEASVSRIQIERAAKKVNITIQTARPGIVIGKKGEDIEKLRLETARLLGMLVSDVRLNIAEIRKPELDAQLVADSIAQQIEKRVMFRRAMKRAVMSTMRSGALGVKVRVSGRLNGSEIARTEWYREGRIPLHTFRADIDYGLSESMTTYGVIGVKVWIFKGEVFDKVETEQAPAEGEAAQAAVAPVQVAPAVEAAPQA	12749
rpsC_lf.cluster1492	4	Ga0577641_0059339_357_1094	Ga0577641_0059339	1	VGQKTHPIGFRLGFTKTWNAKWFANKKNYPVLLKEDIGIRNAIRGRLRDAAIARIDIERSANQVTVTIQTAKPGVVIGKGGAKVEELRQVLGKMTGKMVKVNIFEIRYPELDAYLIAENVAQQLERRVSFRKVLKQTVQRSMKSGAKGVRVAVSGRLGGAEMSRREWEREGRVPLHTLRGDIEFGRATAKTTYGTIGVKAWVYKGEIEPAPRQVTQTSAPAAAPQRPPAPPVPAPPAVPQPARVG	3479
rpsC_lf.cluster1493	1	Ga0480452_0154434_476_1210	Ga0480452_0154434	1	MAPLILEDLTIRTHIKKKLSRAGISRVEIERFGTQSGVGGKSQVRVIIHAARPGIIIGRGGTGIDALKKELDEMTGKQVQLNVQEIRRPELEALLVAENVAQQLERRVAYRRAMKQAVQRSLRAGAKGIRISCSGRLAGSEIARYEWYREGRVPLHTLRADIDFGIAEALTTYGRIGVKVWVYRGEILPERRLETELRRPPRPFDRAGGPPSEPAPVSGGDGTRSHCGHPDQSPTPGCNQETIR	1647
rpsC_lf.cluster1494	35	Ga0577618_0170260_714_1448	Ga0577618_0170260	1	MGQKSHPRGLRLGIIEGWDSKWYASHNYATLLHEDLKLRDFIKRRLYHAGISRIEIERMANKAKINIHTARPGIVIGKKGAEIDKLKGDIQRLMKGKEAFINIHEVRRPDLDPQLVAENIALQLERRVAFRRAMKEAVLRAMRMGAQGVKVHVAGRLGGAEIARVEWYREGRVPLQTLRADVAYGFAEARTTYGMIGVKVWIFRGEVLTRREEDIRRSGLSGAHQQKHRACMVAGLCNASAQES	2587
rpsC_lf.cluster1495	14	Ga0577642_0064510_2199_2933	Ga0577642_0064510	1	VGQKTHPIGFRLGFTKTWNAKWFANKKNYPVLLKEDIGIRNAIRGRLRDAAIARIDIERSANQVTVTIQTAKPGVVIGKGGAKVEELRQVLGKMTGKMVKVNIFEVRYPELDAYLIAENVAQQLERRVSFRKVLKQTVQRSMKSGAKGVRVAVAGRLGGAEMSRREWEREGRVPLHTLRGDIEFGRATAKTTYGTIGVKAWVYKGEIEPAPRQVTQTSPPAAAPQRPPAPPPPLAPAPQPARAT	3461
rpsC_lf.cluster1496	1	Ga0577626_0092964_835_1569	Ga0577626_0092964	1	MTHTVHPYAYRLGIIRDWKSRWFAKSPAKYREGVMVDAAVRRFLKKRLRGTFVTAIEIERNEKAIRIIVKTSRPGLVIGRGGEGSQKLTKEIEAIIKSVPSGARTPSGGKGKAERKAVRLDIEEVRSPESQAPVVAYMVAEGLEKRQTFRRVLKQTVEKVMANRDVQGVRIAIAGRLGGAEMSRTEEIKRGRVPLQTLRADIDFAREQAYLPYGVIGVKVWIYRGNIFAEEKSAQGGSASGRKA	3761
rpsC_lf.cluster1497	1	Ga0577630_0520537_219_953	Ga0577630_0520537	1	VGQKVHPYGFRVGYNKDWHSHWFAKKDFAAFLAEDLKLKRELKKRFAGAGVSHIDVERAANRLKIIIYTSRPGIIIGRKGSELEKLKEDLSNKTGREVIVSIQEITKPELNAQLQAEKVAQQLEKRIAFRRAMRKIMEETQRFGALGVKVMCAGRLNGAEIARTEWSLEGQLPLHTLRADIDYGFAEALTTFGIIGVKIWIYRGEILDPNASMARGTTTDPINEIKVNDRGRSSGRRRERRDRE	1051
rpsC_lf.cluster1498	2	Ga0577639_0239218_701_1435	Ga0577639_0239218	1	MGQKVNPIGLRLGINRTWDSRWFSRKEYGNQLLDDLKLRKFLGTRLTQAAISRVLIERAAKKTRITLHSARPGVVIGKKGADIDKLRGDIAKVTNSEVSLNIVEIRKPEIEAKLIAEGIAQQLERRVAFRRAMKRAVQSAMRFGAQGIRINCSGRLGGAEIARMEWYREGRVPLHTLRADVDYGQATAKTTYGTCGVKVWVFKGEILAHDPMAQDKRLAEAQPAGHDRGRGRDRDRDRDRDQAG	1712
rpsC_lf.cluster1499	1	Ga0577627_0328327_2_733	Ga0577627_0328327	1	MGQKVHPESLRVGYIHDWKSNWFNEKQFSDYLFEDIEIRRHIIGRLSHAGLSDITIRKNANEVEVNINTARPGIVIGKSGSEVDALRRDLHKITNKQVKVNILEIKRPELDARLVAQSIAEQLQNRVAFRRAMKRALTSAMRSGAKGVKVQVSGRLGGAEMARTEGYSDGRVPLHTLRADIDYGFHEARTTFGRIGVKCWINKGEIMPEGYTGTDLTQMDEAPQAPDRGRRGERGDGRGRGGRG	1879
rpsC_lf.cluster15	3	Ga0577627_0008010_5255_6442	Ga0577627_0008010	1	VGQKIHPGGLRVGVIHDWKSNWYTGKKEFPQYILEDVRIREHIYKKLAHAGLSDILIRKDKQRITVDIYTARPGIVIGKSGVEVDALRKELHAMTQKNVHININEIKRPELDAKLVAQSIAEQLSNRVAFRRAMKRALASAIRSGAAGVKIQCSGRLGGGEMSRRETYNEGRVPLHTIRADIDYGFVEARTASGRIGVKVWINKGEIMPKGFDTAGGDDARLGDQDARRRRGGATEGLGASRESARQRGPDREGLGPVKRRRGPGGSGGAGGGGGAGRGPGGAGGGRPGQRRGPSAGARPAGGGAGARPAGGGGAAGGGTRPAGGGGRPASNRPRKQDPKVEGGEQPVSEAQVEETTPTPVTDAPEATTPEATTPEAATPEAATPDAAKDEGAES	9847
rpsC_lf.cluster150	1	Ga0577627_0256576_608_1645	Ga0577627_0256576	1	MGQKVHPGGMRVGVIHDWKSNWYTGKKEFPGYLIEDIKIREHIIGKLSHAGLSDILIRKDKQRITVDIYTARPGIVIGKSGVEVDALRKDLHAITKKNVHININEIKRPELDAKLVAQSIAEQLQNRVSFRRAMKRALASGIRSGAKGVRIQCGGRLGGTEMSRSEAYSEGRVPLHTIRADIDYGFVEAKTTFGRIGVKVWINKGEIMPEGYGGLDTEKDVRLGEQDQARRRRANVEGLGASRESGRDRQRDREGLGPVRPSRKRGGQGRGGGSGRGQGRGGRPAARSRGAQQENVERPRTDEQTAKPPVEPQAETTPAPVADAPETATPEPQTEDTTKQEKADQ	2143
rpsC_lf.cluster1500	1	Ga0577619_01209970_450_1181	Ga0577619_01209970	1	VGQKIHPIGFRIGVIRDWESKWFADKTYAELLYEDYQIRTYLRRRLQNAALSHIEIERQANKVKVTLYTGKPGVIIGRGGKGVDDLKAQIEGKFKKQVVLNVQEIRNPELDAQLVSESIAQQLEKRIAPKRAIRQAIQRSMRMGAQGIRVLVAGRLGGAEMARREAGKDGKVPLHTLRADIDYGFTEARTTYGHIGVKTWIYRGDILPDQRRLMKEMPAPESFAPRGPRRDGEGGGRGGWGGDR	1183
rpsC_lf.cluster1501	1	Ga0577635_0527183_331_1065	Ga0577635_0527183	1	GASVDQLREDLEKRFGNRVRISIQEIKQPELDAQLVAENIASQIERRISYKRAMKQAILRTMRSGAKGVRIYCGGRLRGAEMARREWDREGRVPLHTLRANIDFGRATASTTFGAIGVKCWIYKDVAAPLRKQPVVTDTAAPIAEIAPQPELAAVLAEQPQVEAQVATAEPEVATATPTPAPRRARTTTTTTTTTKPAAKPKAEPKAKAEAKPAAKAKAAPKAKAETATKAPAKKTTTTKKAKS	1065
rpsC_lf.cluster1502	6	soilwarming_1_heated_60-80_052018_S20_5330_2	soilwarming_1_heated_60-80_052018_S20_5330	1	MGQKTHPIGFRLGFTKTWNAKWFANKKNYPVLLKEDIGIRNAIRGRLRDAAIARIDIERSANQVTVTIQTAKPGVVIGKGGAKVEELRQVLGKMTGKMVKVNIFEVRYPELDAYLIAENVAQQLERRVSFRKVLKQTVQRSMKSGAKGVRVAVAGRLGGAEMSRREWEREGRVPLHTLRGDIEFGRATAKTTYGTIGVKAWVYKGEIEPAPRQVTQTSAPAAAAQRPPAPPPPLAPAPQPARAT	2117
rpsC_lf.cluster1503	1	Ga0577630_0147681_988_1722	Ga0577630_0147681	1	MGQKVNPTGLRLGINRTWDSRWYAGKKEYGKLLQEDIKIREYLSDKLKAAGVSRIVIERPHKKCRVTIHSARPGVVIGKKGADIEKLKSDVQKYTTDEVHLNIVEIRKPEIDAKLVAENIAQQLERRVAFRRVMKRSVQTAMRLGALGIRITCAGRLGGAEIARVEWYREGRVPLHTLRADIDYGIATAFTTYGTCGVKVWIFKGEIMEHDPFATEKRQASEAEAGNRPPRERERERERAPAAE	1983
rpsC_lf.cluster1504	4	Ga0577633_0220452_1317_2051	Ga0577633_0220452	1	VGQKTHPIGFRLGFTKTWNAKWFANKKNYPVLLKEDIGIRNAIRGRLRDAAIARIDIERSANQVTVTIQTAKPGVVIGKGGAKVEELRQVLGKMTGKMVKVNIFEIRYPELDAYLIAENVAQQLERRVSFRKVLKQTVQRSMKSGAKGVRVAVSGRLGGAEMSRREWEREGRVPLHTLRGDIEFGRATAKTTYGTIGVKAWVYKGEIEPAPRQVTQTSAPAAAPQRPPAPPLPPAPAPQPARVS	2223
rpsC_lf.cluster1505	5	soilwarming_heated_45-60_052018_S19S24S29_13148_3	soilwarming_heated_45-60_052018_S19S24S29_13148	1	MGQKVNPLGIRLGITRDWTSRWYAGKKQFPIHVYTDFRVRKFLTTKLHEASVSRIQIERAAKKVNITIQTARPGIVIGKKGEDIEKLRQETAKLLSMAVSDVRINIAEIRKPELDSQLVADSIAQQIEKRVMFRRAMKRAVMSTMRSGALGVKVRVSGRLNGSEIARTEWYREGRIPLHTFRADIDYGLSEAHTTYGIIGVKVWIFKGEVFDKVELAQPAEGEAQAAAPGVTAPAAATEAPAQA	2394
rpsC_lf.cluster1506	2	Ga0577631_0137678_665_1399	Ga0577631_0137678	1	MGQKVNPLGIRLGITRDWTSKWYAGKKQFPLHVYTDYRVRRFLRAKLSEASVSRIHIERAAKKVNITIQTARPGIVIGKKGEDIEKLRLETAKLLGMMVSDVRLNIAEIRKPELDSQLVADSIAQQIEKRVMFRRAMKRAVMSTMRSGALGVKVRVSGRLNGSEIARTEWYREGRIPLHTFRADIDYGLSEAMTTYGVIGVKVWIFKGEVFDKVEVEQAPEAEAPPAAAAPPASPAPAEATAAS	1902
rpsC_lf.cluster1507	1	Ga0577639_0000021_4397_5131	Ga0577639_0000021	1	LGQKVHPYGFRLGYNKDWHSHWFAKRQYGDFLIEDLKLKADLKRRFAGAGVSHVDVERAANRLKIIIYTSRPGIIIGRKGSEIDKLKGDIASRTGREVLVSIQEIHKPELNAQLQAEKIAAQLEKRIAFRRAMRKAVEESLRFGAQGIKVKVSGRLNGAEIARSEWHLQGQLPLHTLRSDVDYGFSEAHTTFGVIGVKVWIYRGQILDANAAMARGTGTDPINDTPRPREGRARPRPRRERTEG	113782
rpsC_lf.cluster1508	1	Ga0577631_0027426_3134_3868	Ga0577631_0027426	1	VGQKTHPIGFRLGFTKTWNAKWFANKKNYPVLLKEDIGIRNAIRGRLRDAAIARIDIERSANQVTVTIQTAKPGVVIGKGGAKVEELRQVLGKMTGKMVKVNIFEIRYPELDAYLIAENVAQQLERRVSFRKVLKQTVQRSMKSGAKGVRVAVSGRLGGAEMSRREWEREGRVPLHTLRGDIEFGRATAKTTYGTIGVKAWVYKGEIEPAPRQVTQTSAPAAAPQRPPTPPAPAPAVPQPARVG	3954
rpsC_lf.cluster1509	1	Ga0577627_0631560_564_1298	Ga0577627_0631560	1	PGIVIGRRGAEADRLRAKLADISGNPKIQLNIQEIKQPELDAALIAQGIADQLAGRVSFRRAMKRAVQTVQKAGAQGIRVQCSGRLGGSEMARREAYREGRVPLHTLRADIDYGFREARTTFGRIGVKVWIYKGDILPYKTSAEDKISREAAMAVGETSGQGRPRRVISAGGGRRRPDQGGPGEAGEAGVTADTPIPPDTDDGSAAEPIVQVDPELERLLAEEEEIERRTRGEHHETPHFPKDA	1300
rpsC_lf.cluster151	3	Ga0577626_0236612_559_1596	Ga0577626_0236612	1	VGQKVNPHGFRLGITTDWTSRWYADKNYADYVKEDVAIRKLMSKGMERAGISKVEIERTRDRVRVDIHTARPGIVIGRRGAEADRIRGDLEKLTGKQVQLNILEVKQPESDAQLVAQGVAEQLSSRVSFRRAMRKSMQSAMKSPGVKGIRVQCAGRLGGAEMSRSEFYREGRVPLHTLRADIDYGVYEARTTFGRIGVKVWIYKGDKVMSRAEREAQEAALRQQRRDRPARRGPRSGSTGTTAGGTEAGRQAVEEPQTDGDHVLATAEAEVANAPVDRSADVAETPAAPLSEVNSSESEGGPAASSTEASAAGAAVEAAAPETAATETSPAEVPGDVANEPETEA	2279
rpsC_lf.cluster1510	3	Ga0577630_0080051_1907_2641	Ga0577630_0080051	1	MGQKVNPLGIRLGITRDWTSRWYAGKKQFPIHVYTDFRVRKFLTTKLHEASVSRIQIERAAKKVNITIQTARPGIVIGKKGEDIEKLRQETAKLLSMAVSDVRINIAEIRKPELDSQLVADSIAQQIEKRVMFRRAMKRAVMSTMRSGALGVKVRVSGRLNGSEIARTEWYREGRIPLHTFRADIDYGLSEAHTTYGIIGVKVWIFKGEVFDKVELAQPVAEGEAAAAPAVAAPAPATEAPAQA	2654
rpsC_lf.cluster1511	1	Ga0577633_0246954_18_752	Ga0577633_0246954	1	MGQKVNPLGIRLGITRDWTSKWYAGKKQFPLQVHTDFRVRRFLRAKLAEASVSRIQIERAAKKVNITIQTARPGIVIGKKGEDIEKLRLETARLLGMPVSDVRLNIAEIRKPELDAQLVADSIAQQIEKRVMFRRAMKRAVMSTMRSGALGVKVRVSGRLNGSEIARTELYREGRIPLHTFRADIDYGLSEAMTTYGVIGVKVWIFKGEVFDKVEVEQAPEAEVAQAPAAAAAAQAPAEAIVTS	2088
rpsC_lf.cluster1512	1	Ga0577634_0628838_474_1208	Ga0577634_0628838	1	MGQKVNPLGIRLGITRDWTSRWYAGKKQFPIHVYTDFRVRKFLTTKLHEASVSRIQIERAAKKVNITIQTARPGIVIGKKGEDIEKLRQETAKLLSMAVSDVRINIAEIRKPELDSQLVADSIAQQIEKRVMFRRAMKRAVMSTMRSGALGVKVRVSGRLNGSEIARTEWYREGRIPLHTFRADIDYGLSEAHTTYGIIGVKVWIFKGEVFDKVELAQPVAEGEAAAAPAVAAQPAATEAPAQA	1319
rpsC_lf.cluster1513	2	Ga0506675_0071288_1428_2162	Ga0506675_0071288	1	VGQKTHPIGFRLGFTKTWNAKWFANKKNYPVLLKEDIGIRNAIRGRLRDAAIARIDIERSANQVTVTIQTAKPGVVIGKGGAKVEELRQVLGKMTGKMVKVNIFEIRYPELDAYLIAENVAQQLERRVSFRKVLKQTVQRSMKSGAKGVRVAVSGRLGGAEMSRREWEREGRVPLHTLRGDIEFGRATAKTTYGTIGVKAWVYKGEIEPAPRQVTQTSAPTAAAQRPPAPPPPPAPAPQPARVG	2291
rpsC_lf.cluster1514	3	Ga0577631_0029184_1057_1788	Ga0577631_0029184	1	VGQKTHPIGFRLGFTKTWNAKWFANKKNYPVLLKEDIGIRNAIRGRLRDAAIARIDIERSANQVTVTIQTAKPGVVIGKGGAKVEELRQVLGKMTGKMVKVNIFEIRYPELDAYLIAENVAQQLERRVSFRKVLKQTVQRSMKSGAKGVRVAVSGRLGGAEMSRREWEREGRVPLHTLRGDIEFGRATAKTTFGTIGVKAWVYKGEIEPAPRQVTQANAPAAPAQRPPAPPAPAPAPQPARAT	3853
rpsC_lf.cluster1515	4	Ga0577633_0034121_2311_3042	Ga0577633_0034121	1	MGQKVNPIGIRLGITRDWSSKWYAHSKNFASNIHTDFLVRKFLNKKLADASVSNIHIERAARRANITIHTARPGIVIGKKGEDIEKLRTAVAKILGMGMNDVRLNIAEIRKPELDAKLVAEGISQQLEKRVMFRRAMKRAVTNTMRSGALGIKVRISGRLNGSEIARTETNREGRVPLHTFRADIDYGLAEAQTTYGVIGIKVWIFKGEVFDKPAEEAVEAEAEAAAAAAVAKATEPAAPAAT	5789
rpsC_lf.cluster1516	1	Ga0577628_0247715_3_734	Ga0577628_0247715	1	IAERPGLVIGRKGSSIKALTDAVERQFNFDNPQIEVQEVGNAALNAQIMAAKLANALERGWHFRRAGHSTVRRIMEAGAKGCLVVIAGKLTGQRHRRAKFKDGHIKYCGEPRNTWMRKGFAIAKLKPGVIGVTVQIMDPDAKLPGEIEIKPRTPESIAAAEAARAEAAAAVEEIPEGPGPGPDVVPPPLETDEPPIDLPADEKPLETVKTSKVAGKRLKKVLKKVQELEGEADAGSDLAGEKK	1227
rpsC_lf.cluster1517	2	Ga0577626_0010900_4416_5147	Ga0577626_0010900	1	MGQKIHPTGFRLSVTRNWGSKWFANNKNYAPTLFEDIRIREYLGKKLSHASVSKITIERPAKNARITIHSARPGVVIGKKGEDIETLRGDLRKMMGGEVGLNIEEIRKPEIDAQLIADSIAQQLEKRIMFRRAMKRAMQNAMRLGAQGIKVMSSGRLNGAEIARREWYREGRVPLHTLRADIDYGFSEARTTYGVIGIKVWVFKGERLAHNAEPVQAPAPAPDAPKRPPRRPPPPGAKNAAAS	10919
rpsC_lf.cluster1518	1	Ga0480587_0032561_2_730	Ga0480587_0032561	1	VGQKTHPIGFRLGFTKTWNAKWFANKKNYPVLLKEDIGIRNAIRGRLRDAAIARIDIERSANQVTVTIQTAKPGVVIGKGGAKVEELRQVLGKMTGKSVKVNIFEIRYPELDAYLIAENVAQQLERRVSFRKVLKQTVQRSMKSGAKGVRVAVSGRLGGAEMSRREWEREGRVPLHTLRGDIEFGRATAKTTYGTIGVKAWVYKGEIEPAPRQVTQTNAPAAQAQRPPAPPPVPAAAPAPQPV	1711
rpsC_lf.cluster1519	2	Ga0577633_0176426_471_1202	Ga0577633_0176426	1	MGQKVHPYGFRLGFNKTWRSRWFADREYAKLLHEDLKLRDTLKARFSHAGVSKVEIERAANKLKIDIFTSRPGIIIGRKGTEVDKLKSEIQKKTSREVFINIQEIQKPELDSQLIAESVATQLEKRVAFRRAMRKAVESALRFGARGIKVRVSGRLNGAEIARSEWYLHGQLPLQTLRADIDYGFAEAHTTYGQIGVKVWLYKGERLVPRTGREEDYRVPGGRRPDGRDRDRGHDRDRDRPRA	2510
rpsC_lf.cluster152	1	Ga0577634_0000785_23858_24895	Ga0577634_0000785	1	VGQKIHPGGMRVGVIHDWKSNWYTGTKEFPQYLLEDVKIREHIYKKLSHAGLSDILIRKDKQRITVDIYTARPGIVIGKSGVEVDALRRELHALTQKNVHININEIKRPELDAKLVAQSIAEQLSNRVAFRRAMKRALASAIRSGAAGVKIQCSGRLGGGEMSRRETYNEGRVPLHTIRADIDYGFVEAKTTYGRIGVKVWINKGEIMPAGYEGVITGETRLGDQDARRRRGGATEGLGASRESARQRGPDREGLGPVRPGRRRPSGAGSGRPGSRRGPAPGSKPASARAPRPPRDEQPKAQDQPVTDPPVEEITPPPVVDAAPETPPAAEKPKPRAPRKKPEAS	31612
rpsC_lf.cluster1520	1	Ga0577643_00165254_4_735	Ga0577643_00165254	1	VRISINEIKQPEMNAQLVAENIASQIERRISYRRAMKQSILRTMRAGAKGVRIAAGGRLRGSEMARREWDREGRVPLHTLRADIDFGRATARTTFGMIGVKCWIYKGLVPGRKRGGDLDSDVFPQPVDGATPAPAAAAPPAAAPVAPAPAPVEPAGVVAQAPAVAAAPVEAPPVAAEAAAPIEAPPAAAEAAAPIEAPPVAAEAAAPEASAAPAAEQAPKAPRKRTTKAKAEPAAKEDTDAPA	2726
rpsC_lf.cluster1521	3	Ga0577638_0003024_6960_7691	Ga0577638_0003024	1	MGQKINPIGLRLGINRTWDSRWYSGKNEYGKLVHEDMKIRDVLMKNLKQAAISKIIIERPHKKCRVNIHSARPGVVIGKKGADIDKLRKLVSKLTESEVAINIVEVRKPEIDATLVADSIAQQLERRVAFRRAMKRAVQSAMRLGAEGIRINCSGRLGGAEIARLEWYREGRVPLHTLRADVDYGVATAHTAYGTCGIKVWIFKGEILEHDPMAQDKKLAEVDHSGSGGRPRREREPRDRDAA	19710
rpsC_lf.cluster1522	3	Ga0480584_0259656_253_984	Ga0480584_0259656	1	MGQKVNPIGIRLGITRDWSSKWYAHSKNFASNIHTDFLVRKFLNKKLADASVSNIHIERAARRANITIHTARPGIVIGKKGEDIEKLRTAVAKILGMGMNDVRLNIAEIRKPELDAKLVAEGISQQLEKRVMFRRAMKRAVTNTMRSGALGIKVRISGRLNGSEIARTETNREGRVPLHTFRADIDYGLAEAQTTYGVIGIKVWIFKGEVFDKPAEEAVEAEAEATAAAAVAKSTEPAAPAAS	1015
rpsC_lf.cluster1523	3	Ga0577619_00217495_564_1295	Ga0577619_00217495	1	MGQKVNPIGIRLGITRDWTSKWYAGSKTFASNIHTDFLVRKYLMKKLADASVSRIHIERAARRANITIHTARPGIVIGKKGEDIEKLRTAVAKILGMTMQDVRLNIAEIRKPELDAKLVAEGISQQLEKRVMFRRAMKRAVTNTMRSGALGIKVRISGRLNGSEIARTETNREGRVPLHTFRADIDYGLAEAQTTYGVIGIKVWIFKGEVFDQPEVETPEAEAEAAAAAGAKPAEAVAPPAAG	3097
rpsC_lf.cluster1524	14	Ga0577640_0045745_127_858	Ga0577640_0045745	1	MGQKVNPIGLRLGINRTWDSRWFSRKEYGNQLLDDLKLRKFLGARLTQAAISRVLIERAAKKTRITLHSARPGVVIGKKGADIDKLRGDIAKVTNSEVSLNIVEIRKPEVEAKLIAEGIAQQLERRVAFRRAMKRAVQSAMRFGAQGIRINCSGRLGGAEIARMEWYREGRVPLHTLRADVDYGQATAKTTYGTCGVKVWVFKGEILAHDPMAQDKRLAEAQPAGHERGHDRGRRDRDRDQVG	3272
rpsC_lf.cluster1525	2	Ga0577633_0563141_2_733	Ga0577633_0563141	1	VGQKTHPIGFRLGFTKTWNAKWFANKKNYPVLLKEDIGIRTAIRNRLRDAAIARIDIERSANQVTVTIQTAKPGVVIGKGGAKVEELRQVLGKMTGKMVKVNIFEIRYPELDAYLIAENVAQQLERRVSFRKVLKQTVQRSMKSGAKGVRVAVSGRLGGAEMSRREWEREGRVPLHTLRGDIEFGRATAKTTFGTIGVKAWVYKGEIEPAPRQVTQANAAAAAPQRPPAPPAPAPVPAPARVS	1297
rpsC_lf.cluster1526	1	Ga0577625_0411014_676_1404	Ga0577625_0411014	1	VGQKVHPLGFRLGVIRGWKSNWFSERDFVKYLDEDRQVRDHITRKLSHAGLSDIHLKKDANKLTVDIFTARPGIVIGKSGSEVDALRKELNRLTGKQIQININEIKRPELDARLVAQSIAEQLENRVSFRRAMKRALTSAMRSGAQGMKVQCAGRLGGTEMSRSEHYSDGRVPLHTLRADIDYGFHEAKTTFGRIGVKVWINKGEVLPAGVTDARGRQEAEPPPLPRRGRRDRGSGGGGGGGG	1406
rpsC_lf.cluster1527	1	Ga0577630_0118811_929_1660	Ga0577630_0118811	1	MGQKVNPIGIRLGITRDWSSKWYAHSKNFAGNIHTDFLVRKYLNKKLADASVSNIHIERAARRANITIHTARPGIVIGKKGEDIEKLRTAVAKILGMGMNDVRLNIAEIRKPELDAKLVAEGISQQLEKRVMFRRAMKRAVTNTMRSGALGIKVRISGRLNGSEIARTETNREGRVPLHTFRADIDYGLAEAQTTYGVIGIKVWIFKGEVFDKPTEEVVEAEADAVAAAAVAKSTEPAAPAAT	2201
rpsC_lf.cluster1528	1	Ga0577635_0129759_1403_2131	Ga0577635_0129759	1	VFRPWEANWFANPKDYTKMLHEDLEMRRVILARLRNAGIAKIETERSSNAQLTVTIHTAKPGIVIGKGGASVDQLREDLEKRFGNRVRISIQEIKQPELDAQLVAENIASQIERRISYKRAMKQAILRTMRSGAKGVRIYCGGRLRGAEMARREWDREGRVPLHTLRANIDFGRATASTTFGAIGVKCWIYKDVAVPLRKLPVTGDGAPIADQIAPQPEILETIAEPQVPIAVAATSEVETTT	2131
rpsC_lf.cluster1529	5	Ga0577623_0044029_3090_3821	Ga0577623_0044029	1	MGQKVNPIGIRLGITRDWTSKWYAGSKTFASNIHTDFLVRKYLNKKLADASVSRIHIERAARRANITIHTARPGIVIGKKGEDIEKLRTAVAKILGMTMNDVRLNIAEIRKPELDAKLVAEGISQQLEKRVMFRRAMKRAVTNTMRSGALGIKVRISGRLNGSEIARTETNREGRVPLHTFRADIDYGVAEAQTTYGVIGIKVWIFKGEVFDQPEAEVAEADAEAAAPAGAKSPEAAATPAAG	4098
rpsC_lf.cluster153	9	Ga0577640_0007145_4958_5992	Ga0577640_0007145	1	MGHKVHPNGFRLGVYRNWESKWFATDKEFSALLLEDVKLRKMLFNRLKNAGVARIETERSSSALTITLHTAKPGIVIGKGGTSVDQLRDELEKMTKKRVRVTIQEIKKPELSAQLVAESVAAQLEKRIAFRRAVKQSLMKTMRAGAQGVKIRVKGRLGGSEMARIEWNREGRVPLHTLKADIDFGQTEAKTTFGRIGVSAWVYTGDFPTEQPKRIIEEPSDGEVPVAAALAETPLAAEVLGLPVPATPVLATPEPVAAPVAVAEPEPAPVAVVTPEGAAVRPARRRTTAPAAAPSDAAAAKPKRAPRAAKATTEDAAPKPKRTARAATTTAAKPAAKRTAKKKE	7303
rpsC_lf.cluster1530	3	Ga0577624_0064777_219_950	Ga0577624_0064777	1	MGQKVNPIGLRLGINRTWDSRWFSRKEYGNHLLDDLKLRKFLGARLTQAAISRVLIERAAKKTRITLHSARPGVVIGKKGADIDKLRGDIAKVTNSEVSLNIVEIRKPEIEAKLIAEGIAQQLERRVAFRRAMKRAVQSAMRFGAQGIRINCSGRLGGAEIARMEWYREGRVPLHTLRADVDYGQATAKTTYGTCGVKVWVFKGEILAHDPMAQDKRLAEAQPAGHERGHDRGRRDRDREQVG	3766
rpsC_lf.cluster1531	9	Ga0577641_0011442_1894_2622	Ga0577641_0011442	1	LEIDEHLAKELKRAGYSHVELTKSPVGTRVVIYAAKPGMVIGRRGQSIKDLTKLLEQKFSIENPQLSVATIDIPELDPKVIAAQVAMALQRGVHFRRAAYWGIQRVLESGASGVEIVIRGKLTTERSRFEKFKAGYLPRVGEPVLKYVKEAVQDIQLKQGLFGIKVRILPPNIDVFEHPIIKSEIPQTATAPSEKPIATETTVAGSETAAGEPQSAEKAEVVAPTIIEVKEKQEEVASTQET	6813
rpsC_lf.cluster1532	7	Ga0480584_0129917_552_1280	Ga0480584_0129917	1	MGQKVNPIGIRLGITRDWTSKWYAGSKTFASNIHTDHLVRKYLNKKLADASVSRIHIERAARRANITIHTARPGIVIGKKGEDIEKLRTAVAKILGMTMNDVRLNIAEIRKPELDAKLVAEGISQQLEKRVMFRRAMKRAVTNTMRSGALGIKVRISGRLNGSEIARTETNREGRVPLHTFRADIDYGVAEAQTTYGVIGIKVWIFKGEVFDQPEAEAAEADAEAAAVAGAKPAEAAAPAAG	1477
rpsC_lf.cluster1533	3	Ga0480588_0115930_848_1576	Ga0480588_0115930	1	MGQKIRPTGFRTGIMIGWQSQWYANKQDFADLLVEDATIRAFVHKFLKRRGGGSRDQRPGISKIRIDRTREKVVVTIWSARPGLIIGKKGENIDKLTKALEDLTHRHIEVKTIEVTRPETDPQLVAEEIAEQLEKRASFRRTMKQAIQKSMEAGARGVKLQLSGRLGGAEMARCEKAMDGSIPLSTLRTRVEYGFAEASTAQGNIGIKVWVNNGDYLTEETTDAANAQTRQVSQKPARTRKR	1711
rpsC_lf.cluster1534	7	soilwarming_unheated_30-45_052018_S3S8S13_62723_1	soilwarming_unheated_30-45_052018_S3S8S13_62723	1	RRSQSRAQRQKNNFMGQKVNPIGFRLSVNRDWRSRWYASPQELPAFLHSDLKIRNYVKKKLQFAAVSKIVIERAWNSIRVTIHTARPGIVIGRKGAEIEKMTEEISKMAEGKQVKIDIQEIKTPELDAQLVAENVALQIERRIAYRRAMKKAVQTAMDFSAEGIRLRCSGRLNGAEISRSEWYREGKVPLHTLRTPIDYGFAEANTVYGKIGVKCWICKKEEPAAQAASPPPPPPAPEPAEV	1978
rpsC_lf.cluster1535	2	Ga0577621_0001473_13558_14286	Ga0577621_0001473	1	SVDQLREDLEKRFGNRVRISIQEIKQPELDAQLVAENIASQIERRISYKRAMKQAILRTMRSGAKGVRIYCGGRLRGAEMARREWDREGRVPLHTLRANIDFGRATASTTFGAIGVKCWIYKDQVAPKKVAAAAETSVPLAEIIAPQPELLEVLAEPQAAVEVATPEPEVVTETPAPRRARATTTSTTTRTTTTTAKPAAKPKAAPKPKAEAKTETKAKAAPKAKAEAKAPAKKTSTKKAKS	14288
rpsC_lf.cluster1536	1	Ga0480455_00853605_274_1002	Ga0480455_00853605	1	MGQKVNPIGIRLGITRDWTSKWYAGSKTFASNIHTDFLVRKYLSKKLADASVSRIHIERAARRANITIHTARPGIVIGKKGEDIEKLRTAVAKILGMTMNDVRLNIAEIRKPELDAKLVAEGISQQLEKRVMFRRAMKRAVTNTMRSGALGIKVRISGRLNGSEIARTETNREGRVPLHTFRADIDYGVAEAQTTYGVIGIKVWIFKGEVFDQPEVEAVEADAEAAAATGAKSPEAAAPAAG	1314
rpsC_lf.cluster1537	4	Ga0577624_0267796_671_1399	Ga0577624_0267796	1	MGQKIHPIGFRLSVHRNWRSKWFANSKHYAPTLAQDIKIREYLKKKLSHASVAKVTIERPAKNARITIHSARPGVVIGKKGEDIETLRADLRKMMGGEVGLNIEEIRKPEIDAQLIADSIAQQLEKRIMFRRAMKRAMQNAMRLGAQGIKIMSSGRLNGVEIARREWYREGRVPLHTLRADIDYGFAEARTTYGVIGIKVWVFKGEVLAHDAEPVTAPAPAPEPKRQRRSGPGVGVKNAATS	1793
rpsC_lf.cluster1538	3	Ga0577643_00969866_337_1065	Ga0577643_00969866	1	MKNNFRNLELDEYLASTLKDAGYGDVEVQKTPIGTRITLYVTRPGLVIGRKGTGIKDLTTRLEEKFGLTNPQISVLEVSVPELNPKIMCNRIAQLIERGTAFRRAAMWSMNTIMNAGALGVEVAIAGKLRSERAHFEKHSSGVMPKSGHLAEQVVRIGITSVLTKMGLMGIQLRIALKSELPQEFEFSESSTQVDSAQSQIPADVGAVQSTATATAAEDVALKPRQTDRETIVAPGNTNGQT	1094
rpsC_lf.cluster1539	13	soilwarming_heated_60-80_052018_S20S25S30_47262_4	soilwarming_heated_60-80_052018_S20S25S30_47262	1	MGQKVNPIGIRLGITRDWTSKWYAGSKTFASNIHTDFLVRKYLNKKLADASVSRIHIERAARRANITIHTARPGIVIGKKGEDIEKLRTAVAKILGMTMNDVRLNIAEIRKPELDAKLVAEGISQQLEKRVMFRRAMKRAVTNTMRSGALGIKVRISGRLNGSEIARTETNREGRVPLHTFRADIDYGVAEAQTTYGVIGIKVWIFKGEVFDQPEVEAAEADAEAAAATAPKSPEAVAPAAG	2209
rpsC_lf.cluster154	1	Ga0480452_0032527_2_1033	Ga0480452_0032527	1	LGHKVHPNAFRLGAFRSWEANWFATDKDYTRLLHEDLEMRRVILGRLRNAGIAKIETERSSNAQMTVTIHTAKPGIVIGKGGASVDQLREELERRFQNRVRISIQEIKQPELDAQLVAENIASQIERRISYRRAMKQSILRTMRAGAKGVRIALGGRLRGSEMARREWDREGRVPLQTLRADIDFGRATAKTTFGSIGVKCWIYKDLLKPRRRGGEAEEEQVVAPQPEATVAASAAPVATEAAAPVAAEPAAGAVASAPGAEAPSAPVADAVAQPEAVSEAPTAALEVEAPSEAPTPTAEVAAAPEAAAPEAAAPEAAAPEAASPEAAAPEAASPEAAAPEAAA	3579
rpsC_lf.cluster1540	6	soilwarming_2_heated_10-20_052016_S43_18932_2	soilwarming_2_heated_10-20_052016_S43_18932	1	MGQKVNPTGLRLGINRTWDSRWYAGKNEYGKLLHEDMEIRDALTKQLKQAAVSKIVIERPHKKCRVTIHSARPGVVIGKKGADIEKLRKAVAKLTDSDVVLNIIEIRKPELDARLVAESIAQQLERRVAFRRAMKRAVQSAMRLGAEGIRINCSGRLGGAEIARMEWYREGRVPLHTLRADVDYGQATAKTTYGTCGVKVWVFKGEILAHDPMAQDKRLAEAQPAGHERGHDRGRRDRDQVG	1241
rpsC_lf.cluster1541	5	Ga0577617_0299452_882_1610	Ga0577617_0299452	1	MGQKVNPIGIRLGITRDWTSKWYAGSKTFASNIHTDFLVRKYLNKKLADASVSRIHIERAARRANITIHTARPGIVIGKKGEDIEKLRTAVAKILGMTMNDVRLNIAEIRKPELDAKLVAEGISQQLEKRVMFRRAMKRAVTNTMRSGALGIKVRISGRLNGSEIARTETNREGRVPLHTFRADIDYGVAEAQTTYGVIGIKVWIFKGEVFDQPEVEAPEADAEAAATTGAKPAEAAAPAAG	1680
rpsC_lf.cluster1542	2	Ga0577632_0159198_637_1365	Ga0577632_0159198	1	MGQKVNPIGIRLGITRDWTSKWYAGSKTFASNIHTDFLVRKYLNKKLADASVSRIHIERAARRANITIHTARPGIVIGKKGEDIEKLRTATAKILGMTMNDVRLNIAEIRKPELDAKLVAEGISQQLEKRVMFRRAMKRAVTNTMRSGALGIKVRISGRLNGSEIARTETNREGRVPLHTFRADIDYGVAEAQTTYGVIGIKVWIFKGEVFDQPEVEAAEADAEAAAAPAAKSPEAAAPAAG	2291
rpsC_lf.cluster1543	1	Ga0480455_00037551_2509_3237	Ga0480455_00037551	1	MGQKINPVGFRLSVNRNWGSKWFANTKNFPGMLAEDIKVREYLKKKLSHAAVGKVVIERPSKNARITIYSARPGVVIGKKGEDIEGLRNALQKLMGVPVHVNIEEIRKPELDAQLIADSITGQLEKRVMFRRAMKRAMQNAMRLGAQGIKITSAGRLNGAEIARTEWYREGRVPLHTLRADIDYGFSEARTTYGTIGVQVLVFKGEVLGKGEQPAAPPPEPEKKVRKPAPGREPGAKHAAAS	5904
rpsC_lf.cluster1544	1	Ga0577619_00894629_3_728	Ga0577619_00894629	1	MGQKVHPEAMRVGYIHDWKSNWFNERSFAEYLAEDIRVREHIVGKLAHAGLSDITIRKDANELEVNIHTARPGIVIGKSGTEVDALRRDLHRLTSKQIKVNILEIKRPELDAKLVAQSIAEQLQNRVAFRRAMKRALTSAMRSGAKGVKVQVAGRLGGAEMARTESYSDGRVPLHTMRADIDYGFYEARTTFGRIGVKCWMNKGEIMPEGYTGADLTDMTAPATPNSERDGRGGRDGRGGDG	1422
rpsC_lf.cluster1545	5	Ga0577615_0028554_4434_5162	Ga0577615_0028554	1	MGQKINPIGFRLSVNRNWGSKWFANTKNFPGMLAEDIKVREYLKKKLSHAAVGKVVIERPSKNARITIYSARPGVVIGKKGEDIEGLRNALQKLMGVPVHVNIEEIRKPELDAQLIADSITGQLEKRVMFRRAMKRAMQNAMRLGAQGIKITSAGRLNGAEIARTEWYREGRVPLHTLRADIDYGFSEARTTYGTIGVQVLVFKGEVLGKGEQPVAPPPEPEKKARKPAAGREPGAKHAAAS	5400
rpsC_lf.cluster1546	1	Ga0577630_0096036_877_1605	Ga0577630_0096036	1	MGQKVNPIGLRLGINRTWDSRWFSRKEYGNQLLDDLKLRKFLGTRLTQAAISRVLIERAAKKTRITLHSARPGVVIGKKGADIDKLRGDIAKVTNSEVSLNIVEIRKPEIEAKLIAEGIAQQLERRVAFRRAMKRAVQSAMRFGAQGIRINCSGRLGGAEIARMEWYREGRVPLHTLRADVDYGQATAKTTYGTCGVKVWVFKGEILAHDPMAQDKRLAEAQPAGHDRGRGRDRDRDRDQAG	2436
rpsC_lf.cluster1547	1	Ga0577632_0618472_321_1046	Ga0577632_0618472	1	LGHKVHPNAFRLGVFRSWEANWFATDKDYTKLLHEDLAMRRVILGRLRNAGIAKIETERSSNAQMTVTIHTAKPGIVIGKGGASVDQLREELERRFQNRVRISIQEIKQPELDAQLVAENIASQIERRISYRRAMKQSILRTMRAGAKGVRIALGGRLRGSEMARREWDREGRVPLQTLRADIDFGRATARTTFGTIGVKCWIYKDLIKQRRRGGELEEQVTPQPEGETPAQEAAAQAPAAP	1048
rpsC_lf.cluster1548	1	Ga0480584_0216990_3_728	Ga0480584_0216990	1	MRVGYIHDWKSNWFNERNFAEYLAEDIRIREHIIRKLAHAGLSDITIRKDSGELQVNIHTARPGIVIGKSGTEVDALRRDLHRMTQKQIKVNILEIKRPELDAKLVAQSIAEQLQNRVAFRRAMKRALTSAMRSGAKGVKVQVAGRLGGAEMARTESYSDGRVPLHTMRADIDYGFHEAATTFGRIGVKCWVNKGEIMPEGYTGADLTDMSAPAPPSSDRDGRGGRDGRDGRGRGRGGSGGP	1122
rpsC_lf.cluster1549	4	Ga0577641_0231598_121_849	Ga0577641_0231598	1	MGQKVNPIGIRLGITRDWTSKWYAGSKTFASNIHTDFLVRKYLNKKLADASVSRIHIERAARRANITIHTARPGIVIGKKGEDIEKLRTAVAKILGMTMNDVRLNIAEIRKPELDAKLVAEGISQQLEKRVMFRRAMKRAVTNTMRSGALGIKVRISGRLNGSEIARTETNREGRVPLHTFRADIDYGVAEAQTTYGVIGIKVWIFKGEVFDQPEIEAAEADAEGAAATAPKPAEAPAPAAG	1846
rpsC_lf.cluster155	2	Ga0577618_0306820_372_1406	Ga0577618_0306820	1	MGQKVNPYGFRLGVTTDWKSRWFSDREYTDYLIEDWHIRDYLMRQLERAAVSRVEVERTRDRLRIDVHTARPGIVIGRRGAEADRLRADLAKITHNVKVQLNIQEIKQPELDAALIAQAVCDQLTGRVSFRRAMKRAVQTAQKAGAQGIRVQCSGRLGGSEMARSEWYREGRVPLHTLRADIDYGFREARTTFGRIGVKVWIYKGDILPYKISGEDKIQREAAMAVGETSGQVRPRRVISAGGGRRKPDQGEPGEPGTETPAAAEATEVAEAAEVAEAAEGAVTVEGAVPVEGAEPTEGEEAPAAAPLVKEADPELERLLAEEEEIERRTRQHHETPHFRSGDE	1886
rpsC_lf.cluster1550	14	soilwarming_2_unheated_50-60_052016_S35_8892_5	soilwarming_2_unheated_50-60_052016_S35_8892	1	MGQKVNPIGIRLGITRDWTSKWYAGSKTFASNIHTDFLVRKYLNKKLADASVSRIHIERAARRANITIHTARPGIVIGKKGEDIEKLRTAVAKILGMTMNDVRLNIAEIRKPELDAKLVAEGISQQLEKRVMFRRAMKRAVTNTMRSGALGIKVRISGRLNGSEIARTETNREGRVPLHTFRADIDYGVAEAQTTYGVIGIKVWIFKGEVFDQPEAEAAEADAEAAAATPPKPAEAPAPAAG	2048
rpsC_lf.cluster1551	4	Ga0577631_0019018_1738_2466	Ga0577631_0019018	1	MGQKVNPIGIRLGITRDWTSKWYAGSKTFASNIHTDYLVRKYLMKKLADASVSRIHIERAARRANITIHTARPGIVIGKKGEDIEKLRTAVAKILGMTMQDVRLNIAEIRKPELDAKLVAEGISQQLEKRVMFRRAMKRAVTNTMRSGALGIKVRISGRLNGSEIARTETNREGRVPLHTFRADIDYGLAEAQTTYGVIGIKVWIFKGEVFDAPEAEGPEAEAEAPAATGAKSAETAAPAAG	4598
rpsC_lf.cluster1552	1	Ga0577634_0084311_3221_3949	Ga0577634_0084311	1	RTRDRLRVDVYTARPGIVIGRRGAEADRIRGNLEKLTGKQVQLNILEVRNPEIDAQLVAQGVAEQLSSRVAFRRAMRKAMQSAMKAGAKGIRVQCSGRLGGAEMSRSEFYREGRVPLHTLRANIDYGFFEARTTFGRIGVKVWIYKGDVLSLRDGREQAAQSARAGRSGERRDERGGRGGERGERRGAGGRRPAGDRPARGGRGGGAGGSAPATDSAPATESAAPATAEAPSSAAPAESKES	3949
rpsC_lf.cluster1553	3	Ga0577638_0247535_281_1009	Ga0577638_0247535	1	MGQKVNPIGIRLGITRDWTSKWYAGSKTFASNIHTDHLVRKYLNKKLADASVSRIHIERAARRANITIHTARPGIVIGKKGEDIEKLRTAVAKILGMTMNDVRLNIAEIRKPELDAKLVAEGISQQLEKRVMFRRAMKRAVTNTMRSGALGIKVRISGRLNGSEIARTETNREGRVPLHTFRADIDYGVAEAQTTYGVIGIKVWIFKGEIFDQPEVEAAEADAEAAAAAGAKPAEAAAPAAG	2676
rpsC_lf.cluster1554	4	Ga0577621_0234866_352_1080	Ga0577621_0234866	1	MGQKVNPIGIRLGITRDWTSKWYAGSKTFASNIHTDFLVRQYLNKKLADASVSRIHIERAARRANITIHTARPGIVIGKKGEDIEKLRTAVAKILGMTMNDVRLNIAEIRKPELDAKLVAEGISQQLEKRVMFRRAMKRAVTNTMRSGALGIKVRISGRLNGSEIARTETNREGRVPLHTFRADIDYGVAEAQTTYGVIGIKVWIFKGEVFDQPEVEAAEADAEAAAATGAKSPEAAAPAAG	1489
rpsC_lf.cluster1555	1	Ga0577630_0400578_36_764	Ga0577630_0400578	1	MGQKVNPIGIRLGITRDWTSKWYAGSKTFASNIHTDFLVRKYLNKKLADASVSRIHIERAARRANITIHTARPGIVIGKKGEDIEKLRTAVAKILGMTMNDVRLNIAEIRKPELDAKLVAEGISQQLEKRVMFRRAMKRAVTNTMRSGALGIKVRISGRLNGSEIARTETNREGRVPLHTFRADIDYGVAEAQTTYGVIGIKVWIFKGEVFDQPEVEAPEAEAEAAAAPAPKSAEAAAPAAG	1205
rpsC_lf.cluster1556	1	Ga0480585_0047931_1_726	Ga0480585_0047931	1	MGQKIHPIGFRLSVNKNWSSRWYANSRNFATMLNEDLKVRDYLKKRLAHASVGKVVIERPAKDARITIHSARPGVVIGKKGEDIEMLKADLRKLLGVQMVHVNIEEIRKPEVDAQLISDSIAQQLEKRIMFRRAMKRAMQNAMRLGAQGIKIMSAGRLNGIEIARTEWYREGRVPLHTLRADIDYGFSEAKTTYGVIGIKCWVYKGEVLAKGDQPVAPAAPSADEILAAKKVKKAPPKPAPI	2170
rpsC_lf.cluster1557	1	Ga0577625_0434232_640_1365	Ga0577625_0434232	1	MGQKINPTGFRLAVSRNWSSRWYASNRDFAGMLAEDIKVREYLKAKLKNAAVSRVLIERPAKNARITIFSARPGVVIGKKGEDIEALKKELSRQLGVPVAVNIEEVRKPEIDAKLIADSITQQLEKRIMFRRAMKRAMQNAMRLGALGIKIMSSGRLNGIEIARCEWYREGRVPLHTLRADIDYGTSEAKTTYGVIGVKVWVYKGDTLGRNDAPGAKMVEVPDEERKPRGPRRDARPGDRPG	1365
rpsC_lf.cluster1558	1	Ga0577630_0026847_59_787	Ga0577630_0026847	1	MGQKVNPIGIRLGITRDWTSKWYAGSKTFASNIHTDFLVRSYLNKKLADASVSRIHIERAARRANITIHTARPGIVIGKKGEDIEKLRTATAKILGMTMNDVRLNIAEIRKPELDAKLVAEGISQQLEKRVMFRRAMKRAVTNTMRSGALGIKVRISGRLNGSEIARTETNREGRVPLHTFRADIDYGTAEAQTTYGVIGIKVWIFKGEVFDQPQVEAAEADAEAAAAPGAKSPEAAAPAAG	4408
rpsC_lf.cluster1559	2	Ga0577642_0294261_149_877	Ga0577642_0294261	1	MGQKVNPIGIRLGITRDWTSKWYAGSKTFASNIHTDHLVRKYLNKKLADASVSRIHIERAARRANITIHTARPGIVIGKKGEDIEKLRTAVAKILGMTMNDVRLNIAEIRKPELDAKLVAEGISQQLEKRVMFRRAMKRAVTNTMRSGALGIKVRISGRLNGSEIARTETNREGRVPLHTFRADIDYGVAEAQTTYGVIGIKVWIFKGEVFDQPEVEAPEAETEAAAAPAAKPADAAAPAAG	1614
rpsC_lf.cluster156	1	Ga0577634_0248450_85_1119	Ga0577634_0248450	1	MGQKVHPGGLRVGVIHDWKSNWMVPDKEFAGALLEDLKIREHILGKLAHAGLSDILIRKDKQRITVDIYTARPGIVIGKSGVEVDALRKEIHAMTAKNVHININEIKRPELDAKLVAQSIAEQLQNRVSFRRAMKRSLASAIRSGAAGVKVQCSGRLGGSEMSRSEQYSEGRVPLHTIRADIDYGFTEARTPTGRIGVKVWINKGEIMPTGYGGIPGGGSRETRLGDQDTARRRGGVTEGLGASRESARGRSQDREGLGPVRRGKPGQRGAARPGARGRGPRAQENVDKPRTTDEAVSAEGREQPPIEPRVETVPKPQAEAEQKVAGKKQVEDKTKLDDSGGKG	2254
rpsC_lf.cluster1560	1	Ga0480455_00173141_1614_2342	Ga0480455_00173141	1	MGQKVNPIGIRLGITRDWTSKWYAGSKTFASNIHTDFLVRKYLNKKLADASVSRIHIERAARRANITIHTARPGIVIGKKGEDIEKLRTAVAKILGMTMNDVRLNIAEIRKPELDAKLVAEGISQQLEKRVMFRRAMKRAVTNTMRSGALGIKVRISGRLNGSEIARTETNREGRVPLHTFRADIDYGVAEAQTTYGVIGIKVWIFKGEVFDQPEVEAVEADAEAAAATGAKPAEAAAPTLS	2966
rpsC_lf.cluster1561	1	Ga0506675_0011943_3819_4541	Ga0506675_0011943	1	MGQKTHPIGLRLGIVKTWDSRWFAKRNYAELLREDLLIKRYLKKRLYQAGISKITIERKGDKVTIGIRTARPGLVIGRKGEQVDKLSEEMKQLTKKVVQLNIEEIKRADLDAQLVAEHIAKQLEQRVSFRRCMKKAIASSMRAGAQGIRVACSGRLGGSEMARFETYREGRVPLHTLRADIDFARATAFTPYGTCGVKVWMFHGELLDKPAAGLPERGAEQDHGMRAAPASGRARPATERG	4543
rpsC_lf.cluster1562	1	Ga0480590_0064138_3_725	Ga0480590_0064138	1	MGQKTHPHGFRLGFTKTWNAKWYANTKNYSGLVKEDVTIRSAIRARLRDAAISRIDIERSTNQVTVTIHTAKPGVVIGKGGAKVEELRQVLGKTTGKAVKVNIFEIRFPEVDANLIAENVAQQLERRVSFRKVLKQTVQRAMKSGAKGVRVAVAGRLGGAEMSRREWEREGRVPLHTLRADIDFGRAIAKTTFGTIGVKAWIYRGDIEPAPRQVSSQNTPTSATAPRATPPLPPTPPLPTA	1596
rpsC_lf.cluster1563	10	soilwarming_2_heated_60-80_052018_S25_96_9	soilwarming_2_heated_60-80_052018_S25_96	1	MGQKTHPIGFRLGFTKTWNAKWYANRKNYPVLLKEDIGIRNAIRGRLRDAAIARIDIERSANQVTVTIQTAKPGVVIGKGGAKVEELRQVLGKMTGKMVKVNIFEIRYPELDAYLIAENVAQQLERRVSFRKVLKQTVQRSMKSGAKGVRVAVAGRLGGAEMSRREWEREGRVPLHTLRADIEFGRAIAKTTYGTIGVKAWIYKGEIEPAPRQVTQASASAAPAARPPAPPAPAPAPARAS	30633
rpsC_lf.cluster1564	1	Ga0577628_0035309_2_727	Ga0577628_0035309	1	ARPGVVIGKKGEDIEMLKADLRKLLGVQMVHVNIEEIRKPEVDAQLIADSIAQQLEKRIMFRRAMKRAMQNAMRLGAQGIKIMSAGRLNGIEIARTEWYREGRVPLHTLRADIDYGFSEAKTTYGVIGIKCWVYKGEVMAKGDQPVAPPAPSADEVLAAKKVKKAPPKPAPSASEEKVEPIAAAKRASDTGSSAAPQAKPRAARPHPVAAKKAGGDAKGRAEAKSVAKPKTAVKKSRKPKA	2865
rpsC_lf.cluster1565	2	Ga0480588_0137106_835_1560	Ga0480588_0137106	1	DLAKKTKREVFIDIQEVHKPELDAQLVSESIALQLEKRVAFRRAMRKAVDSALRFGCKGIKVRVSGRLNGNEIARSEWYLQGQLPLHTLRADLDYGFSEARTTYGVIGVKTWVYKGEILDSTGRKTGLKNDPEPRRAPRGDRDRDRDRRDRRGPGGGPGAGQGAGQGGPGGGFGAQAPAAGSHPPAEQHVGGAQQQAPGELPQPARSTTPIAPPLSSPQPSWKQELKSEVPPATEPNKGSE	1560
rpsC_lf.cluster1566	6	Ga0577636_0020731_2103_2828	Ga0577636_0020731	1	MGQKIHPIGFRLSVARNWTSKWFANSKHYAPTLAEDIKVREYLKRKLSHASVAKVTIERPAKNARITIHSARPGVVIGKKGEDIETLRGDLRKMMGGDVGLNIEEIRKPEIDAQLIADSIAQQLEKRIMFRRAMKRAMQNAMRLGAQGVKIMSSGRLNGVEIARREWYREGRVPLHTLRADIDYGFSEARTTYGVIGIKVWVFRGEVMAHNAEPTAAPAPAPETPKRPRRASAGVKNAATS	3091
rpsC_lf.cluster1567	11	Ga0577630_0229615_122_847	Ga0577630_0229615	1	MGQKVNPIGFRLGVIRSWDSKWYEEKNYAKWLHEDIKLREYVKKKLGQAGISKVEIERAASKVKINVHTARPGIVIGKRGAGIEQIKKELQAFTQNEVFLNIVEVRKAEVDAQLVAENITTQLERRIAFRRAMKKAIQTAQKFGAKGIRVACSGRLGGAEMARYEWYREGRVPLHTLRADIDYGFAEAKTTYGKIGCKVWIFRGEVLPEGVTAAPEKGAPPARPSRPLPPRASQTTPTPVQ	1599
rpsC_lf.cluster1568	1	Ga0577615_0594346_66_791	Ga0577615_0594346	1	MGQKVNPIGIRLGITRDWTSKWYAGSKSFASNIHTDYLVRQYLNKKLADASVSRIHIERAARRANITIHTARPGIVIGKKGEDIEKLRTAVAKILGMTMNDVRLNIAEIRKPELDAKLVAEGISQQLEKRVMFRRAMKRAVTNTMRSGALGIKVRISGRLNGSEIARTETNREGRVPLHTFRADIDYGIAEAQTTYGVIGIKVWIFKGEVFDQPEAESVEADAEGAAATGAKPAEAPAPSS	1208
rpsC_lf.cluster1569	19	soilwarming_heated_50-60_052016_S41S44S47_26735_4	soilwarming_heated_50-60_052016_S41S44S47_26735	1	MGQKVNPIGLRLGINRTWDSRWFSRKEYGNQLLDDLKLRKFLGARLTQAAISRVLIERAAKKTRITLHSARPGVVIGKKGADIDKLRGDIAKVTNSEVSLNIVEIRKPEVEAKLIAEGIAQQLERRVAFRRAMKRAVQSAMRFGAQGIRINCSGRLGGAEIARMEWYREGRVPLHTLRADVDYGQATAKTTYGTCGVKVWVFKGEILAHDPMAQDKRLAEAQPAGHERGHDRGRRDRDQVG	2297
rpsC_lf.cluster157	11	Ga0577617_0022185_3343_4377	Ga0577617_0022185	1	VGHKVHPNAFRLGWFRPWEANWFATEKDYTKLLHEDLDMRRLILSRLRNAGIARIETERSSNAQMTVTIHTAKPGIVIGKGGASVDQLREDLEKRFGNRVRISIQEIKQPELDAQLVAENIASQIERRISHRRAMKQSVLRTMRAGAKGVRIAMAGRLRGGEMARRESDREGKVPLHTLRADIKFGRATAKTTYGTIGVKCWIYKDLLQPRTRGGQPQEELFPQPQPETQQPAPERGGQPAPAVGSGARSEGRPADPASPQVASQTVRQQVSSEREGRSQRRRSPRPEGAGGPPRPPRPSPSGSEGRSAAPGEGEAVPHDQSTGTPAPEPPASPAPEEGGGAPS	5898
rpsC_lf.cluster1570	2	soilwarming_unheated_0-10_052018_S1S6S11_3712_4	soilwarming_unheated_0-10_052018_S1S6S11_3712	1	MGQKVRPTGFRTGIMQPWASSWYANKHDFSELLVEDYTIRAFVQKSLTNTRDRKATRPAISKIRIERTRERVTVTILSSRIGAIIGKKGEKIEKLTKALEKLTRRHIDIKTIEVTRPEIDPQLVAEDICEQLEKRASFRRTMKQAIQRAMENGAKGVKLQLSGRLGGSEMARCEKGMNGSIPLSTLRAKVDYGFAEASTPQGNIGVKCWINNGDYLTGEINDATDAQASSVSKKPTRRRKG	2634
rpsC_lf.cluster1571	4	Ga0577639_0000525_7692_8417	Ga0577639_0000525	1	MGQKVNPIGLRLGINRTWDSRWFANTGEYGKLLHEDIKIRKYLEKELKQAAISKVVIERPHKKCRVTIHAARPGLIIGKKGADIEKLRKKLMEMTKSETHLNIVEVRKPEIDATLVAQSIAQQLERRIAFRRAMKRAVQSAMRLGAEGIRINCAGRLGGAEIARMEWYREGRVPLHTLRADVDYGTAEANTAYGICGVKVWVFKGEILEHDPMASERRATEGDHAHGGGGERERGRRRENA	16587
rpsC_lf.cluster1572	1	Ga0577617_0420236_1_726	Ga0577617_0420236	1	KKVRVTIQEIKRPELDAKLVSDNVAGQLEKRIAFRRAIKQSLLKTMRAGAQGIKIRVKGRLGGGEMARIAWDRQGRVPLHTLRANIDFGQSEAHTTFARIGVSVWLFDREAPVAAPRVEEVLVEPVRTDAPLAPEMAAAFAPVIEPAVVAAEVPAAPAEPVPVAASPAAAPPKPRATRARATKGATTETGEVKPKAPRKAATQKAPAQTRSATSDSKAPKAAGKASATRKPAAGKSPGKEA	1393
rpsC_lf.cluster1573	1	Ga0577618_0371896_263_985	Ga0577618_0371896	1	VGQKVHPIGYRLGFTKTWNAKWFAEAKNYRALLKEDIGIRTTIRGRLRDAAIARIDIERSTNQVTVTIQTAKPGVVIGKGGAKVEELRQALGKTTGKVVKVNIFEIRYPELDANLIAENVAQQLERRVSFRKVLKQTVSRSMKAGAKGVRVAVAGRLGGAEMSRREWEREGRVPLHTLRADIEFGRAIAKTTYGTIGVKAWIYRGDIEPAPRQVSQNAPAAAARPAAMAAPTPTGPAAAV	1695
rpsC_lf.cluster1574	2	Ga0577639_0020873_3280_4002	Ga0577639_0020873	1	MGQKINPTGFRLAVNRDWASKWYANSKHFPTILNEDIKVRAYLKKKLAHASVGKITIERPAKNARITIHSARPGVVIGKKGEDIETLRAELRKMMGTEVGLNIEEIRKPEIDAQLVADSIAQQLEKRIMFRRAMKRAMQNAMRLGAQGIKIMSAGRLNGIEIARTEWYREGRVPLHTLRADIDYGFAEAKTTYGVIGIKVWVFKGEVMPHNGEPQAAPAPAPEAPKRVRKSAGVKNVAAS	4880
rpsC_lf.cluster1575	2	Ga0577633_0012097_2576_3298	Ga0577633_0012097	1	LSVTKYFIKDMSRRLEIDELLQKDLKRAGYSKVELTKSPVGTRVVIYAAKPGMVIGRRGQSIKDLTKMLEEKFGIENAQLSVATIEQPEQDPKVVASQVAQALQRGVHFRRAAYWAIQRVMESKALGVEIVIRGKLTTERSRFEKFRAGYLPRVGDPVLKSLKVAVADVQLKQGLFGIKVRILPPNVDFIDKPVMKTFVEAVKPPAEIVKQQEIVTPSEVETKQQPAEEAAEPVANPAEA	9240
rpsC_lf.cluster1576	1	Ga0577625_0472560_525_1247	Ga0577625_0472560	1	MGQKVHPYGFRVGYNKDWHSHWFAKHDFAKFLAEDLKLKRDLKRRFSGGGVSHIDIERAATRLKIIIYTSRPGIIIGRKGSEIEKLREDLARKTGREVLISIQEIRHPELNAQLQAEKISQQLEKRIAFRRAMKKTMEESQRFGAQGIKVMIAGRLNGAEIARTEWSLQGRLPLHTLRADIDYGFAEALTTFGIIGVKVWIYRGEILDPNASMARGTTTDPMNEVKVERGARRPRRDDRR	1304
rpsC_lf.cluster1577	5	soilwarming_2_heated_60-80_052018_S25_45_9	soilwarming_2_heated_60-80_052018_S25_45	1	MGQKTHPIGFRLGFTKTWNAKWFANKKNYPVLLKEDIGIRNAIRGRLRDAAIARIDIERSANQVTVTIQTAKPGVVIGKGGAKVEELRQVLGKMTGKMVKVNIFEIRYPELDAYLIAENVAQQLERRVSFRKVLKQTVQRSMKSGAKGVRVAVSGRLGGAEMSRREWEREGRVPLHTLRGDIEFGRAIAKTTYGTIGVKAWVYKGEVEPAPRQVTQAAAPSAAAPRPPAPPPAPAPVRAS	46607
rpsC_lf.cluster1578	2	Ga0577619_00332856_1438_2160	Ga0577619_00332856	1	VARARGGCEDKGRWFALSVSSVTAEPGDQGAGQRRREGHGVTDDSAFKKQVRARMSGTGEKYTVARRMVIAGRDGGQPPVVLRVYLNPHVDVELTAEAGRAYAAADERGRREMAGRLLADQIELAGPGEARVAAGSKVVADQELRAAAEAAEDAAIRGAVQRGIDRAVGVSAVEVGRAAGRLRVSIRAARPILLAGHRGAEADRLRGELEELAGRRVRLDIWEVPGPQEGPGSEGSGRAG	2482
rpsC_lf.cluster1579	1	Ga0577625_0057512_2502_3224	Ga0577625_0057512	1	MGQKIHPEGFRVGYIHDWKSNWYNEKDFSDYLLEDIAIRDHIEGKLSHAGLSKITIVKGSAEVEIDISTARPGIVIGKSGSEVDALRKELHKLTGKPVKVNIKEIKRPELDAKLVAQSIAEQLQNRVAFRRAMKRALTSAMRSGAKGVKVQVSGRLGGAEMARTEGYSDGRVPLHTLRADIDYGFIEARTTTGRIGVKCWINKGEVMPEGFRSNLTDEDGPPPPRSGGGGGGGRGRGGGR	3887
rpsC_lf.cluster158	1	Ga0577630_0384004_168_1202	Ga0577630_0384004	1	MGQKVHPIGFRLGIKVGDRSVKDWQGRWFATGTEYATLLLEDIRVRQHIMTRMQDAGVSKVEIERSANMITVTIHAAKPGIVIGKSGVKVEELRRTLEAMTGKRIRVTIQEIRQPEIDAFLVARSIADQLEKRVAFRRAMKQAVQRAQRFGAKGVRVQVSGRLGGSEMSRREWDRWGRVPLHTLRADIDFGLTEAHTTYGIIGVKVWVYRGDFTPDGRSPDEVAAEQRQPDRRGPRATVRAEVPEAPVAEAVAPPVPAEIDYSTGGVFDPGEESGEIRPRGAGEPAEATPPTPPVAPTRPAPTPPPPAVRPAPTPPAPPVQRSTPPTPPTPPAPPTPPAPRGEE	1232
rpsC_lf.cluster1580	10	Ga0480585_0130791_442_1164	Ga0480585_0130791	1	VGQKTHPIGFRLGFTKTWNAKWFANKKNYPVLLKEDIGIRNAIRGRLRDAAIARIDIERSANQVTVTIQTAKPGVVIGKGGAKVEELRQVLGKMTGKMVKVNIFEIRYPELDAYLIAENVAQQLERRVSFRKVLKQTVQRSMKSGAKGVRVAVSGRLGGAEMSRREWEREGRVPLHTLRGDIEFGRAIAKTTYGTIGVKAWVYRGEIEPAPRQVTQPSAPAAPAPRPPAPAPVPAPARVS	1371
rpsC_lf.cluster1581	6	Ga0577641_0426691_346_1068	Ga0577641_0426691	1	MGQKVNPIGLRLGINRTWDSRWFSRKEYGNQLLDDLKLRKFLGGRLTQAAISRVLIERAAKKTRITLHSARPGVVIGKKGADIDKLRGDIAKVTNSEVSLNIVEIRKPEIEAKLIAEGIAQQLERRVAFRRAMKRAVQSAMRFGAQGIRINCSGRLGGAEIARMEWYREGRVPLHTLRADVDFGHATAKTTYGTCGVKVWVFKGEILAHDPMAQDKRIAEGQAAGGGERSGGRRDRERAE	1349
rpsC_lf.cluster1582	12	Ga0577624_0293660_263_985	Ga0577624_0293660	1	MGQKIHPTGFRLAVNRDWTSKWYANSKHFPTILNEDIKVRAYLKKKLAHASVGKITIERPAKNARITIHSARPGVVIGKKGEDIETLRANLRKMMGTEVGLNIEEIRKPEIDAQLVADSIAQQLEKRIMFRRAMKRAMQNAMRLGAQGIKIMSSGRLNGIEIARCEWYREGRVPLHTLRADIDYGFAEAKTSYGVIGIKVWVFKGEVMPHNAEPLAAPVPAPEAPKRVRKPAGVKNAATS	1703
rpsC_lf.cluster1583	11	Ga0577619_00087845_249_971	Ga0577619_00087845	1	MGQKINPIGFRLSVNRDWASKWYANSKHFPATLNEDIKVRDYLRKKLSHASVGKITIERPAKNARITIHSARPGVVIGKKGEDIETLRASLRKMMGTEVGLNIEEIRKPEIDAQLVADSIAQQLEKRIMFRRAMKRAMQNAMRLGAQGIKIMSSGRLNGIEIARTEWYREGRVPLHTLRADIDYGFAEAKTTYGVIGIKVWVFKGEVLPHNAEPQAAPAPAPEAPKRIRKSAGVKNVAAS	4775
rpsC_lf.cluster1584	2	Ga0577634_0004183_9821_10543	Ga0577634_0004183	1	VGQKTHPIGFRLGFTKTWNAKWFANKKNYPVLLKEDIGIRNAIRGRLRDAAIARIDIERSANQVTVTIQTAKPGVVIGKGGAKVEELRQVLGKMTGKMVKVNIFEIRYPELDAYLIAENVAQQLERRVSFRKVLKQTVQRSMKSGAKGVRVAVSGRLGGAEMSRREWEREGRVPLHTLRGDIEFGRAIAKTTYGTIGVKAWVYKGEVEPAPRQVTQAAAPSAAAARPPAPAPAPAPVRAS	15315
rpsC_lf.cluster1585	35	Ga0480478_059809_68_790	Ga0480478_059809	1	MGQKINPIGLRLGINRTWDSRWFAGKNEYGKLLHEDVKIREILHKELKQAAVARIVIERPHKKCRVTIHSARPGVVIGKKGADIDKLRKRVADITASDVVINIVEIRKPELDATLVAESIAQQLERRVAFRRAMKRAVQSAMRLGAEGIRINCSGRLGGAEIARLEWYREGRVPLHTLRADVDYGVATAHTAYGTCGIKVWIFKGEILEHDPMAQDKRLAEADHSSTHRPRREPREREAV	1070
rpsC_lf.cluster1586	4	Ga0577633_0382240_161_883	Ga0577633_0382240	1	MGQKINPIGLRLGVNRTWDSRWFASKAEYGKLLHEDMKIRDSLTKSLKQAAISKIVIERPHKKARINIHSARPGVVIGKKGADIEKLRKQVAKLTNSEVAINIVEVRKPEVDATLVAESIAQQLERRVAFRRAMKRAVQSAMRLGAEGIRINCSGRLGGAEIARLEWYREGRVPLHTLRADVDYGVATAHTAYGTCGIKVWIFKGEILEHDPMAQDKRLAEADHSSTHRPRREPREREAG	1630
rpsC_lf.cluster1587	3	Ga0577643_00048132_543_1265	Ga0577643_00048132	1	MSVTKYFIKDVSRRLEIDELLQRDLKRAGYSRVELTKSPVGTRVVIYAAKPGMVIGRRGQSIKDLTKLLETKFGIENPQLSVATIDIPEQDPKVIASQVAQALQRGVHFRRSAYWAIQRVMESQALGVEIIIRGKLTTERARYEKFRAGYLPRVGDPVLKSVKVAVADVQLKQGSFGIKVRILPPNVEFIDKAVLREVPVSAAPAQPAETSPPETPPPEPQVAAETEAKEEETIGNPTEA	4731
rpsC_lf.cluster1588	2	Ga0577628_0215844_188_910	Ga0577628_0215844	1	MGQKVNPIGLRLGINRTWDSRWFSRKEYGNQLLDDLKLRKFLGARLTQAAISRVLIERAAKKTRITLHSARPGVVIGKKGADIDKLRGDIAKVTNSEVSLNIVEIRKPEIEAKLIAEGIAQQLERRVAFRRAMKRAVQSAMRFGAQGIRINCSGRLGGAEIARMEWYREGRVPLHTLRADVDYGHATAKTTYGTCGVKVWVFKGEILAHDPMAQDKRLAEGQAAGGGERSGGRRDRERAE	1310
rpsC_lf.cluster1589	2	Ga0577626_0509148_128_850	Ga0577626_0509148	1	VGQKVNPIGLRLGINRTWDSRWFSNKREYGKLLHEDIAIREYLKTELKQAGISKILIERPHKKCRVTIYSARPGVVIGKKGADIEKLRKKVAGLTSSEVHLNIVEVRKPEVDATLVADNIAQQLERRVAFRRAMKRAVQSAQRMGAEGIKITCAGRLGGAEIARVEWYREGRVPLHTLRADVDYGVATAHTAYGTNGVKVWVFKGEILEHDPMAQDKRMAEPQDGGQRPRRDRDRDGAHA	1470
rpsC_lf.cluster159	1	Ga0480585_0092608_438_1472	Ga0480585_0092608	1	MGQKIHPGGFRIGIIHDWKSNWFSEKEFGAYLIEDVRIREHIRGKLSHAGLSDIHIRKDSQRITIDIYTARPGIVIGKSGSEVEALRQDVHAMTHKAVHVNINEIKRPELDANLVAQSVAEQLQNRVSFRRAMKRSLASAMRSGAQGVRIRCGGRLGGAEMSRTEQYSEGRVPLHTLRADIDYGFAEAQTQAGRIGVKVWINKGEIMPAGYEGAQQQTTRLGEVDARRRRGVTTITEDTGPSRPERRRGPGGGGGPGGGGGGGGGGGGRPGGGGGGRPGGGPGGGRGGRPGGQQTGPSGPSTPQGRRAPVRPAPAPPEAEATPVAPPVEAPAPEAPAAPQEGEA	1615
rpsC_lf.cluster1590	3	Ga0577615_0710330_344_1066	Ga0577615_0710330	1	MGQKIHPTGFRLAVNRDWTSKWYANSKHFPTILNEDIKVRAYLKKKLSHASVGKITIERPAKNARITIHSARPGVVIGKKGEDIETLRANLRKMMGTEVGLNIEEIRKPEIDAQLVADSIAQQLEKRIMFRRAMKRAMQNAMRLGAQGIKIMSSGRLNGIEIARCEWYREGRVPLHTLRADIDYGFAEAKTSYGVIGIKVWVFKGEVMPHNAEPQAAPAPAPEAPKRARKPAGVKNVAAS	1088
rpsC_lf.cluster1591	1	Ga0577639_0321328_284_1006	Ga0577639_0321328	1	MGQKIHPTGFRLAVNRDWSSKWYANSKHFPTILNEDIKVRAYLKKKLAHASVGKITIERPAKNARITIHSARPGVVIGKKGEDIETLRANLRKMMGTEVGLNIEEIRKPEIDAQLVADSIAQQLEKRIMFRRAMKRAMQNAMRLGAQGIKIMSSGRLNGIEIARCEWYREGRVPLHTLRADIDYGFAEAKTSYGVIGIKVWVFKGEVMPHNAEPVAAPVVAPEAPKRARKPVGVKNVAAS	1487
rpsC_lf.cluster1592	1	Ga0577641_0178811_672_1394	Ga0577641_0178811	1	VKTWNAKWYAGSKNYPVLLKEDVTIRSAIRARLRDAAISRIDIERSTNQVTVTIHTAKPGVVIGKGGAKVEELRQVLGKTTGKAVKVNIFEIRYPELDAVLIAENVAQQLERRVSFRKVLKQTVLRSMKSGAKGVRVAVAGRLGGAEMSRREWEREGRVPLHTLRADIEFGRAIAKTTFGTIGVKAWVYKGDIEPAPRQVAQNAPGSGAQRPVAPPPPAPAPTPAPVAAAAPSAPPAVGV	2097
rpsC_lf.cluster1593	4	Ga0577641_0109735_774_1496	Ga0577641_0109735	1	VGQKTHPIGFRLGFTKTWNAKWYANRKNYPVLLKEDIGIRNAIRGRLRDAAIARIDIERSANQVTVTIQTAKPGVVIGKGGAKVEELRQVLGKMTGKMVKVNIFEIRYPELDAYLIAENVAQQLERRVSFRKVLKQTVQRSMKSGAKGVRVAVSGRLGGAEMSRREWEREGRVPLHTLRADIEFGRAIAKTTYGTIGVKAWIYKGEIEPAPRQVTQGSAPAAPAARPPAPAPVPVPARAS	2643
rpsC_lf.cluster1594	1	Ga0577634_0218980_1553_2275	Ga0577634_0218980	1	MGQKVNPIGLRLGINRTWDSRWFSRKEYGNQLLDDLKLRRFLGGRLGQAAVSKVLIERMAKRTRITLHSARPGVIIGKKGADIDKLRGDIAKVTNSEVSLNIVEIRKPEIEAKLIAEGIAQQLERRVAFRRAMKRAVQSAMRFGAQGIRINCGGRLGGAEIARMEWYREGRVPLHTLRADVDYGSATAKTTYGTCGVKVWVFKGEILAHDPMAQDKRINEMQAAGGGGHDRDRDRSGRDR	2414
rpsC_lf.cluster1595	1	Ga0577616_0427316_365_1087	Ga0577616_0427316	1	MGQKIHPTGFRLSVNRDWASKWYANSKHFASTLNEDIKVRDYLRKKLAHASVGKITIERPAKNARITIHSARPGVVIGKKGEDIETLRASLRKMMGTDVGLNIEEIRKPEIDAQLVADSIAQQLEKRIMFRRAMKRAMQNAMRLGAQGIKIMSSGRLNGIEIARTEWYREGRVPLHTLRADIDYGFAEAKTTYGVIGIKVWVFKGEVLPHNAEPQAAPAPASEAPKRARKSPGVKNVAAS	1217
rpsC_lf.cluster1596	1	Ga0577641_0521344_163_885	Ga0577641_0521344	1	MGQKINPTGFRLSVNRDWASKWYANSKHFPTILNEDIKVRDYLRKKLAHASVGKITIERPAKNARITIHSARPGVVIGKKGEDIETLRASLRKMMGTEVGLNIEEIRKPEIDAQLVADSIAQQLEKRIMFRRAMKRAMQNAMRLGAQGIKIMSSGRLNGIEIARTEWYREGRVPLHTLRADIDYGFAEAKTTYGVIGIKVWVFKGEVLPHTAEPQAAPAPAPEAPKRARKSAGAKNVAAS	1211
rpsC_lf.cluster1597	1	Ga0577639_0641111_327_1046	Ga0577639_0641111	1	MGQKVHPESMRVGYIHDWKSNWFNERNFSDYLHEDTQIRGHIIRRLSHAGLSDITIRKNATEVEINIHTARPGIVIGKSGSEVDQLRRDLHRITGKQVKVNILEIKRPELDARLVAQSIAEQLQNRVAFRRAMKRALTSAMRSGAKGVKVQVSGRLGGAEMARTEGYSDGRVPLHTLRADIDYGFHEARTTFGRIGVKCWINKGEIMPAGYTGADLTIMDEPAPQAPERGGRDGRGGRDG	1046
rpsC_lf.cluster1598	1	Ga0506675_0285057_45_767	Ga0506675_0285057	1	MGQKIHPTGFRLSVNRNWSSKWYANSKHFPTILNEDIKVRDYLKKKLSHASVGKITIERPAKNARITIHSARPGVVIGKKGEDIETLRSNLRKMMGTEVGLNIEEIRKPEIDAQLVADSIAQQLEKRIMFRRAMKRAMQNAMRLGAQGIKIMSSGRLNGIEIARTEWYREGRVPLHTLRADIDYGFAEAKTTYGVIGIKVWVFKGEVLPHNAEPQIAPPPAPEPPKRVRKAPGVKNAAAS	1213
rpsC_lf.cluster1599	5	Ga0577627_0069762_2472_3194	Ga0577627_0069762	1	MGQKVNPYGIRLGITRDWISKWYASKKQFPINVHTDYRVREFLTTRLKDASVSRVAIERAAKKVNITIQTARPGIVIGKKGEDIEKLRQETAKLLGMTVNDVRLNISEIRKPELDSKLVADSIAQQIEKRVMFRRAMKRAVMSTMRSGALGVKVRVSGRLNGSEIARTEWYREGRIPLHTFRADIDYGLSEARTTYGVIGVKVWIFKGEVFDKPAVDQPVATGEASEGAPAGTPAAEATA	4047
rpsC_lf.cluster16	21	Ga0577619_00596939_448_1635	Ga0577619_00596939	1	MTRLTRAAKKRRALLGQKVNPIGYRLGVVKGWQSRWYAERDYKDIFAEDDLIRRSINKDLANASVSRIEIERAASNQVTVTIHTAKPGIVIGKSGEKVDKLRAMLEGKTKKRVRLNILEIRQPELDAYLVGRSIAEQLEKRVSFRRAMKQAVQKSMRANAKGVKVIIGGRLGGAEIARSEKEVEGKIPLQTLRADIDYGLAEAHTTFGVIGIKVWIYKGDILPNKRREAGDFQQEVAAQPSFAPREGGDRRGGDRRRSDGGQRGERGDRGPRPQGDRPSGGDRGPRQAGDRSQRPQGDRPPRPQGERGPRPQGDRPQGQGGERAPRQPRPQGERAPRPQGERTPRPQGERPARAEQAPTAQPTPETTPVAPIEAVETPTTPPTPDTGATQSDQSE	1800
rpsC_lf.cluster160	7	soilwarming_2_heated_50-60_052016_S44_3992_3	soilwarming_2_heated_50-60_052016_S44_3992	1	MGHKVHPNGFRLGVYRNWESKWFATDKEFSALLLEDVKLRKMLFARLKNAGVARIETERSSSALTITLHTAKPGIVIGKGGTSVDQLRDELEKMTKKRVRVTIQEIKKPELSAQLVAESVAAQLEKRIAFRRAVKQSLMKTMRAGAQGVKIRVKGRLGGSEMARIEWNREGRVPLHTLKADIDFGQTEAKTTFGRIGVSAWVYTGDFPTERPKKVAEEPTDGEVPVAAALAETPLVAEALGLPVAIPAEPVPVPVPVPVAVVEPEPEPAVSVPAAAAEPAARPARRRTTATATAPSEAPAKPRRAPRAVKATTEEAAPKQKRATRATSAEPKPATRRTAKKKE	3247
rpsC_lf.cluster1600	1	Ga0577643_00242579_1544_2266	Ga0577643_00242579	1	LRDELEKRTGKRVRVTIQEIKKPELSAQLVAENVAAQLEKRIAFRRAIKQSLMKTMRAGAQGVKIRLRGRLGGSEMARVEWNREGRVPLHTLKADIDFGQTEAKTTFGRIGVSAWVYTGNFPTEAPPKPAPVVEEEEAEAPISTLPGLPVAVAEPALVTAAVAAPAAAEPAPVATADAAPAKPKRAPRATKAATTTEGTEKTPAKRATRSRTATAKTAESASSAEAAPKPARTRTTKKKE	2267
rpsC_lf.cluster1601	3	Ga0480455_00879268_169_888	Ga0480455_00879268	1	MGQKVNPIGIRLGITRDWSSKWYAHSKNFASNIHTDFLVRQYLMKKLADASVSRIHIERAARRANITIHTARPGIVIGKKGEDIEKLRTAVAKILGMTMQDVRLNIAEIRKPELDAKLVAEGISQQLEKRVMFRRAMKRAVTNTMRSGALGIKVRISGRLNGSEIARTETNREGRVPLHTFRADIDYGLAEAQTTYGVIGIKVWIFKGEVFDQPEAEAPEAETDAAAPAPTTAAAPAAG	1293
rpsC_lf.cluster1602	47	soilwarming_1_heated_10-30_052018_S17_1708_6	soilwarming_1_heated_10-30_052018_S17_1708	1	MGQKVNPIGLRLGINRTWDSRWYAEGGEYAKMLHEDIHIRKVLRERLSQAGVAKIVIERPAKRARVTIHTARPGVVIGKKGADIEKLRGDLAKMTKGEVALNIVEIRKPEIDATLIAENIAQQLERRVAFRRAMKRAVQSAMRLGAQGIRINCSGRLGGAEIARMEWYREGRVPLHTLRADIDYGIATAFTTFGTCGVKVWVFKGEIMAHDPMAHDKRAEEAAPQRTPTRVERTEQRDA	2434
rpsC_lf.cluster1603	5	Ga0577622_0257280_664_1383	Ga0577622_0257280	1	MGQKVNPIGIRLGITRDWTSKWYAGSKTFASNIHTDHLVRKYLNKKLADASVSRIHIERAARRANITIHTARPGIVIGKKGEDIEKLRTAVAKILGMTMNDVRLNIAEIRKPELDAKLVAEGISQQLEKRVMFRRAMKRAVTNTMRSGALGIKVRISGRLNGSEIARTETNREGRVPLHTFRADIDYGVAEAQTTYGVIGIKVWIFKGEVFDQPEAEAVEAEAEGAAKPAEAAAAPTLS	1431
rpsC_lf.cluster1604	3	Ga0577619_00939847_318_1037	Ga0577619_00939847	1	MGQKVNPIGLRLGVNRTWDSRWFAGRTEYGKLLHEDMAIRATLMKNLKQAAISKIVVERPHKKCRVTIHSARPGVVIGKKGADIDKIRKVVAKMTESEVLINIVEVRKPEIDAVLVADSIAQQLERRVAFRRAMKRAVQSAIRLGAEGIRINCSGRLGGAEIARLEWYREGRVPLHTLRADVDYGTATAHTAYGTCGIKVWIFKGEILEHDPMAQDKKMAEQDHSGGGGERRRRERDAA	1380
rpsC_lf.cluster1605	1	Ga0577624_0540916_468_1187	Ga0577624_0540916	1	KDSNELEVNIHTARPGIVIGKSGSEVDALRRDLHRMTNKQIKVNILEIKRPELDASLVAQSIAEQLQNRVAFRRAMKRALTSAMRSGAKGVKVQVAGRLGGAEMARTESYSDGRVPLHTMRADIDYGFYEARTTFGRIGVKCWVNKGEIMPEGYTGSDLTDMTAPTAPSSDRDGRGGREGRDGRGRGRGGGPGGAGGRGGGSGGFGGGGRGGGGGRGGPGGRGPGAGGNGSPSRGGGGR	1188
rpsC_lf.cluster1606	3	Ga0480584_0134564_348_1067	Ga0480584_0134564	1	MGQKVNPIGIRLGITRDWSSKWYAHSKNFASNIHTDFLVRQYLMKKLADASVSRIHIERAARRANITIHTARPGIVIGKKGEDIEKLRTAVAKILGMTMQDVRLNIAEIRKPELDAKLVAEGISQQLEKRVMFRRAMKRAVTNTMRSGALGIKVRISGRLNGSEIARTETNREGRVPLHTFRADIDYGLAEAQTTYGVIGIKVWIFKGEVFDQPEAEAPEAEIEAAATAPTTAAAPAAG	1451
rpsC_lf.cluster1607	8	Ga0577642_0044326_1346_2065	Ga0577642_0044326	1	MGQKVNPIGFRLGVIRTWDSKWYEEKNYAKWLHEDIRLREYVKKKLGSAGISRVEIERAANKVKVNVHTARPGIVIGKRGAGIESIKKELQAFTANEVFLNIVEVRKAETDAQLVAENITTQLERRIAFRRAMKKAIQTAQKFGAKGIRVACSGRLGGAEMARYEWYREGRVPLHTLRADIDYGFAEAKTTYGKIGCKVWIFRGEVLPETAATGSDKRGASRPSTDVKRGTGTSTPAPV	4117
rpsC_lf.cluster1608	1	Ga0577636_0024559_214_933	Ga0577636_0024559	1	MGQKVNPIGIRLGITRDWTSKWYAGSKTFASNIHTDFLVRKYLNKKLADASVSRIHIERAARRANITIHTARPGIVIGKKGEDIEKLRTAVAKILGMTMNDVRLNIAEIRKPELDAKLVAEGISQQLEKRVMFRRAMKRAVTNTMRSGALGIKVRISGRLNGSEIARTETNREGRVPLHTFRADIDYGVAEAQTTYGVIGIKVWIFKGEVFDQPEAEAVEVEAEGTAKPAEAAAAPTLS	2920
rpsC_lf.cluster1609	7	soilwarming_2_heated_60-80_052018_S25_36341_2	soilwarming_2_heated_60-80_052018_S25_36341	1	MGQKVNPIGFRLGVIRSWDSKWYEEKNYAKWLHEDIRLREYVKKKLGQAGISKVEIERAANKVKINVHTARPGIVIGKRGAGIESIKKELQAFTQNEVFLNIVEVRKAETDAQLVAENITTQLERRIAFRRAMKKAIQTAQKFGAKGIRVACSGRLGGAEMARYEWYREGRVPLHTLRADIDYGFAEAKTTYGKIGCKVWIFRGEVLPEGAGAEKRSAQGRQAPTRSASSSTATPTPVQ	1346
rpsC_lf.cluster161	2	Ga0577625_0017657_1706_2737	Ga0577625_0017657	1	MGQKIHPGGFRIGIIHDWKSNWFSEKEFGAYLIEDVRIRDHIRGKLSHAGLSDIHIRKDSQRITIDIYTARPGIVIGKSGSEVEALRQDVHAMTHKAVHVNINEIKRPELDANLVAQSVAEQLQNRVSFRRAMKRSLASAMRSGAQGVRIRCGGRLGGAEMSRTEQYSEGRVPLHTLRADIDYGFAEAQTQAGRIGVKVWINKGEIMPAGYEGAQQQTTRLGEVDARRRRGVTTITEDTGPSRPERGRRPGGGPGGGGGGRPGGGGGGGGRPGGGPGGGGRPGGGRSGGGPGGRGQQTGPSGPSTPVGRRAPDRSAKPVEEAPPVAPPVEAPEAAAPPAEGDA	7110
rpsC_lf.cluster1610	1	soilwarming_heated_60-80_052018_S20S25S30_166347_2	soilwarming_heated_60-80_052018_S20S25S30_166347	1	FEIKQPELEAPLVAQGIAEQLVGRVSFRRAMRRGVQTAMRAGAKGIRVQVGGRLGGAEMSRSEWYREGRVPLHTIRADIDYGFREAHTQFGGRIGVKVWIYRGDVMPTLEEKEAELAKARARAAATGDIIPAAIPPRDRATRERPGAGRGAPGRGAKPAARGTGTRAPRGTGPARAPKAPGAPKAPAAPKAAPKPKAEAPAPEPAAPDAAAPDAAAPEAAAPDAAAPDAAAPEAPKADE	1167
rpsC_lf.cluster1611	1	Ga0577622_0428558_193_912	Ga0577622_0428558	1	MGQKVNPIGLRLGVNRTWDSRWFAGRAEYGKLLHEDMAIRATLMRNLKQAAISKIVIERPHKKCRVTIHSARPGVVIGKKGADIDKIRKIVAKMTESEVLINIVEVRKPEIDAVLVADSIAQQLERRVAFRRAMKRAVQSAIRLGAEGIRINCSGRLGGAEIARLEWYREGRVPLHTLRADVDYGTATAHTAYGTCGIKVWIFRGEILEHDPMAQDKKMADQDHSGGGGERRRRERDAA	1092
rpsC_lf.cluster1612	1	Ga0577639_0335842_2_721	Ga0577639_0335842	1	SSVDQLREDLEKRFGNRVRISIQEIKQPELDAQLVAENIASQIERRISYKRAMKQAILRTMRSGAKGVRIYCGGRLRGAEMARREWDREGRVPLHTLRANIDFGRATANTTFGAIGVKCWIYKDVAAPLRKQPVAADAAAPIAEIAPQPDLAAVLAEQPQVEAQVATAEPEVATPTAAPRRTRATTATPTTTAKPAAKPKAEPKAKAETKAKAAAPKAKAETAKAPAKKPTTTTKKTKS	1454
rpsC_lf.cluster1613	11	soilwarming_3_heated_45-60_052018_S29_27659_3	soilwarming_3_heated_45-60_052018_S29_27659	1	MGQKVNPIGLRLGINRTWDSRWYAEGEEYATMLHEDISIRKVLRKRLSQAGVAKIVIERPAKRARVTIHTARPGVVIGKKGADIEKLRGDLAKMTKGEVALNIVEIRKPEVDATLIAENIAQQLERRVAFRRAMKRAVQSAMRLGAQGIRINCSGRLGGAEIARMEWYREGRVPLHTLRADIDYGIATAFTTFGTCGVKVWVFKGEILAHDPTAHDRRAEEGTQQRTPARVERTEQRDA	1238
rpsC_lf.cluster1614	1	Ga0480588_0122294_832_1551	Ga0480588_0122294	1	MGQKVNPIGLRLGINRTWDSRWFANTGEYGKLLHEDIKIRKYLEKELKQAAISKVVIERPHKKCRVTIHAARPGLIIGKKGADIEKLRKKLMEMTKSETHLNIVEVRKPEIDATLVAQSIAQQLERRIAFRRAMKRAVQSAMRLGAEGIRINCAGRLGGAEIARMEWYREGRVPLHTLRADVDYGTAEAHTAYGICGVKVWVFKGEILEHDPMASERRASEGDAAQGGDRERGRRRENA	1662
rpsC_lf.cluster1615	2	Ga0480455_01071724_195_914	Ga0480455_01071724	1	MGQKVNPIGLRLGINRTWDSRWFSRKEYGNQLLDDLKLRKFLGGRLTQAAISRVLIERAAKKTRITLHSARPGVVIGKKGADIDKLRGDIAKVTNSEVSLNIVEIRKPEIEAKLIAEGIAQQLERRVAFRRAMKRAVQSAMRFGAQGIRINCSGRLGGAEIARMEWYREGRVPLHTLRADVDYGHATAKTTYGTCGVKVWVFKGEILAHDPMAQDKRIAEGQAAGGERSGGRRDRDRAE	1159
rpsC_lf.cluster1616	1	soilwarming_heated_50-60_052016_S41S44S47_127335_2	soilwarming_heated_50-60_052016_S41S44S47_127335	1	ITGKRVRVTIQEIKKPELAAQLVAENVAAQLEKRIAFRRAIKQSLMKTMRAGAQGVKIRVKGRLGGSEMARVEWNREGRVPLHTLKADIDFGQTEAKTTFGRIGVSAWVYTGNFPTEAAVKPPTAVEEPVESGVPVGVAIGEAPSPLAELVQVAVPAAAPEAAPATPAPVTADVPAAKPKRAARATKATTATTATTAEAPTADAGEKATPKRTTRARATTADKADAPKAPRARAPKKKE	1108
rpsC_lf.cluster1617	7	Ga0577630_0505170_281_1000	Ga0577630_0505170	1	MGQKVNPIGLRLGINRTWDSRWYATRGEYPLLLHEDLKMRNHILTSRKQAGISKVVIERPHKKCRVTVHTARPGILIGKKGSDIEKLRRELAAMTDSEVHLNIVEVRKPEVDAVLVAEGIAQQLERRVAFRRAMKRAVQSAMRMGALGIRINCGGRLGGAEIARMEWYREGRVPLHTLRANIDYGTALGRTAYGIIGVKVWIFKGEIMEHDPMAQETKALEAQEGGRSQGRREPSPAQA	1068
rpsC_lf.cluster1618	6	Ga0577620_0055169_1393_2112	Ga0577620_0055169	1	MGQKVNPIGIRLGITRDWSSKWYAGSKTFASNIHTDFLVRQYLMKKLADASVSRIHIERAARRANITIHTARPGIVIGKKGEDIEKLRTAVAKILGMTMQDVRLNIAEIRKPELDAKLVAEGISQQLEKRVMFRRAMKRAVTNTMRSGALGIKVRISGRLNGSEIARTETNREGRVPLHTFRADIDYGLAEAQTTYGVIGIKVWIFKGEVFDQPEAEAPEAETDAGATAPTTAAAPAAG	2675
rpsC_lf.cluster1619	2	Ga0577630_0052700_2387_3106	Ga0577630_0052700	1	MGQKVNPIGLRLGINRTWDSRWYAEGGEYAKMLHEDIHIRKVLRERLSQAGVAKIVIERPAKRARVTIHTARPGVVIGKKGADIEKLRGDLAKMTKGEVALNIVEIRKPEIDATLIAENIAQQLERRVAFRRAMKRAVQSAMRLGAQGIRINCSGRLGGAEIARMEWYREGRVPLHTLRADIDYGTATAFTTFGTCGVKVWVFKGEIMAHDPMAHDKRAEEAAPQRTPARVERSEQRDA	3221
rpsC_lf.cluster162	1	Ga0577633_0007469_10151_11182	Ga0577633_0007469	1	MGQKVHPEALRVGYIHDWKSNWFNEKNFSDYLYEDVQIRSHIIGRLSHAGLSDITIRKNATEVEVNIHTARPGIVIGKSGSEVDQLRRDLHRITSKQVKVNILEIKRPELDARLVAQSIAEQLQNRVAFRRAMKRALTSAMRSGAKGVKVQVSGRLGGAEMARTEGYSDGRVPLHTLRADIDYGFHEARTTFGRIGVKCWINKGEIMPEGYTGADLTIMDEPAPQAPERGGRDGRGRGDGRGGRGGGPGGPGGRGGGPGGRGGGPGGPGGRGGGPGGRGGGPGGRGGGPGGRGGGPGGGGGRGPRPGGGGGPGGGGGRGPRPGGGGGRGGQGGGGQSGGGITR	11338
rpsC_lf.cluster1620	2	Ga0577634_0069381_3529_4248	Ga0577634_0069381	1	MGQKVNPIGLRLGVNRTWDSRWFAGRTEYGKLLHEDMAIRATLMKNLKQAAISKIVIERPHKKCRVTIHSARPGVVIGKKGADIDKIRKIVAKMTQSEVLINIVEVRKPEIDAVLVADSIGQQLERRVAFRRAMKRAVQSAIRLGAEGIRINCSGRLGGAEIARLEWYREGRVPLHTLRADVDYGTATAHTAYGTCGIKVWIFKGEILEHDPMAQDKKMAEQEHSGGGGERRRRERDAA	4343
rpsC_lf.cluster1621	12	Ga0506675_0004228_166_882	Ga0506675_0004228	1	MGQKVNPIGLRLGVNRTWDSRWYASKKEYGKLLQEDIKIRNYLQDKLKQAGVSRIFIERPHKKCRVTIHSARPGVVIGKKGADIEKLKSDLSKYTDSEIHLNIVEIRKPEIDAKLVADNIAQQLERRVAFRRAMKRAVQSAMRLGAQGIRINCAGRLGGAEIARVEWYREGRVPLHTLRADIDYGVATAKTTYGTCGVKVWVFKGEIMEHDPMAQDKRLNEAAEQASRGGAQRPPAMG	6474
rpsC_lf.cluster1622	3	Ga0577619_00813884_669_1385	Ga0577619_00813884	1	MGQKVNPIGLRLGINRTWDSRWFANKGEYGRLLHEDMAIRQALMDDLKQAAVSKIVIERPHRKCRVTIHSARPGIVIGKKGADIEKLRKKVAAMTDSEVHINIVEVRKPEIDAALVAASIAQQLERRVAFRRAMKRAVQSAMRLGAEGIRISCGGRLGGAEIARMEWYREGRVPLHTLRADIDFGHATANTAYGTCGVKVWIFKGEIMEHDPMASERRLVEGAEQGSTGRRREAAAAT	1504
rpsC_lf.cluster1623	27	Ga0577632_0075198_1876_2592	Ga0577632_0075198	1	MGQKVNPIGFRLGVIRSWDSKWYEEKNYAKWLHEDIRLREYVKKKLGQAGISKVEIERAASKVKVNVHTARPGIVIGKRGAGIESIKKELQQFTQNEVFLNIVEVRKAETDAQLVAENITTQLERRIAFRRAMKKAIQTAQKFGAKGIRVACSGRLGGAEMARYEWYREGRVPLHTLRADIDYGFAEAKTTYGKIGCKVWIFRGEVLPESAAEAKKTPQQRGAPSRVTTGGATPTPVQ	3368
rpsC_lf.cluster1624	1	Ga0480585_0013264_105_821	Ga0480585_0013264	1	MGQKINPIGFRLAVNRNWSSKWYANSRNFAPMLAEDIKVRAFLKRKLAHASVGRVLIERPAKDARITIFSARPGVVIGKKGEEIEALKSELRRIMGVQQVHVNIEEIRKPEIDAQLIADSIAQQLEKRIMFRRAMKRAMQNAMRLGAQGIKIMSAGRLNGIEIARTEWYREGRVPLHTLRADIEYGFSEARTTYGTIGVQVLVFKGEILGKGEQPAAPPPEAEKKPARKPGVKHAAAS	3757
rpsC_lf.cluster1625	1	Ga0577641_0672820_332_1048	Ga0577641_0672820	1	DIERTRDRVRVDIHTARPGIVIGRKGAEADRIRGELEKLTGKQVQLNILEVKSPESDAQLVAQGVAEQLSSRVSFRRAMRKAMQSAMKNPLVKGIRVQCSGRLGGAEMSRSEFYREGRVPLHTLRANIEYGFFEARTTFGRIGVKVWIYKGDAVPGREAPVDAGAPRPRRDRGDRPERPRRLRSGSSGTTAGGTEAGRAAAAPVASAPVASAPATSTPAAASTDAGAAPAAPATQQEG	1050
rpsC_lf.cluster1626	1	Ga0577617_0243648_58_774	Ga0577617_0243648	1	MGQKVNPIGLRLGINRTWDSRWFSRKEYGNQLLDDLKLRKFLGARLTQAAISRVLIERAAKKTRITLHSARPGVVIGKKGADIDKLRGDIAKVTNSEVSLNIVEIRKPEVEAKLIAEGIAQQLERRVAFRRAMKRAVQSAMRFGAQGIRINCSGRLGGAEIARMEWYREGRVPLHTLRADVDYGQATAKTTYGTCGVKVWVFKGEILAHDPMAHDKRAEEAAPQRTPARVERTEQRDA	1877
rpsC_lf.cluster1627	3	Ga0480584_0044626_1297_2013	Ga0480584_0044626	1	MGQKVNPIGIRLGITRDWTSKWYAGSKTFASNIHTDFLVRQYLNKKLADASVSRIHIERAARRANITIHTARPGIVIGKKGEDIEKLRTAVAKILGMTMNDVRLNIAEIRKPELDAKLVAEGISQQLEKRVMFRRAMKRAVTNTMRSGALGIKVRISGRLNGSEIARTETNREGRVPLHTFRADIDYGIAEAQTTYGVIGIKVWIFKGEVFDQPEVEGPEAEAEAAAKTAEAPAPAAG	2537
rpsC_lf.cluster1628	4	Ga0480452_0237584_1_714	Ga0480452_0237584	1	MGQKVNPHGFRLGITTDFKSRWYADKLYKDYVKEDVAIRRMMTKGMERAGISKVEIERTRDRVRVDIHTARPGIVIGRRGAEADRIRGELEKLTGKQVQLNILEVKNPEVDAQLVAQAVAEQLSSRVSFRRAMRKSMQSTMKAGAKGIKIQCGGRLGGAEMSRSEFYREGRVPLHTLRANVDYGFFEAKTTFGRIGVKVWIYKGDVKNIAEVRADNAAARAGNRPARGGGGGGGAGND	1317
rpsC_lf.cluster1629	20	soilwarming_unheated_30-45_052018_S3S8S13_12237_6	soilwarming_unheated_30-45_052018_S3S8S13_12237	1	MGQKVNPIGLRLGINRTWDSRWYAEGGEYSKMLHEDIHIRKVLRERLSQAGVARIVIERPAKRARVTIHTARPGVVIGKKGADIEKLRGDLAKMTKGEVALNIVEIRKPEIDATLIAENIAQQLERRVAFRRAMKRAVQSAMRLGAQGIRINCSGRLGGAEIARMEWYREGRVPLHTLRADIDYGIATAFTTFGTCGVKVWVFKGEIMAHDPMAHDKRAEEAAPQRTPARVEREQRDA	4114
rpsC_lf.cluster163	2	Ga0577625_0088881_1778_2806	Ga0577625_0088881	1	MGQKIHPGGFRIGIIHDWKSNWFSEKEFGAYLIEDVRIRDHIRGKLSHAGLSDIHIRKDSQRITIDIYTARPGIVIGKSGSEVEALRQDVHAMTHKAVHVNINEIKRPELDANLVAQSVAEQLQNRVSFRRAMKRSLASAMRSGAQGVRIRCGGRLGGAEMSRTEQYSEGRVPLHTLRADIDYGFAEAQTQAGRIGVKVWINKGEIMPAGYEGAQQQTTRLGEVDARRRRGVTTITEDTGPSRPERGRRPGGGGGAGGGGGRPGGGGGGGGGRPGGGPGGGRPGGGGRPGGGPGGRGQQTGPSGPSTPVGRRAPDRSAKPAPEAPPAAAPPVDTPAPTEGDA	3122
rpsC_lf.cluster1630	1	Ga0480452_0000082_45461_46174	Ga0480452_0000082	1	MGQKVHPEAMRVGYIHDWKSNWFSDRNFSDYLAEDIRIREHIVRKLAHAGLSDITIRKDSGELEVNIHTARPGIVIGKSGSEVDALRRELHRMTNKQIKVNILEIKRPELDASLVAQSIAEQLQNRVAFRRAMKRALTSAMRSGAKGVKVQVAGRLGGAEMARTESYSDGRVPLHTMRADIDYGFYEARTTFGRIGVKCWVNKGEIMPEGYTGADLTDMSAPPPPGAERDGRGGGALM	46174
rpsC_lf.cluster1631	2	Ga0577634_0003671_8892_9608	Ga0577634_0003671	1	MGQKVNPIGLRLGINRTWDSRWYAEGGEYATMLHEDIHIRKVLRQRLAQAGVAKIVIERPAKRARVTIHTARPGVVIGKKGADIEKLRADLAKMTKGEVALNIVEIRKPEIDATLIAENIAQQLERRVAFRRAMKRAVQSAMRLGAQGIRINCSGRLGGAEIARMEWYREGRVPLHTLRADIDYGVATAFTTFGTCGVKVWVFKGEIMAHDPMAHDKRAEEAAPQRTPARVERTEQRD	16214
rpsC_lf.cluster1632	1	Ga0577633_0823558_1_714	Ga0577633_0823558	1	MGQKVHPIGFRLGVKVGERSVKDWDGRWFATGKEYSDLLLEDVRVREHIMTRMADAGVAKVEIERSANMITVTIHAAKPGIVIGKSGVKVEELRRTLEAKTGKRIRVTIQEIRQPEINAMLVARSIADQLEKRVAFRRAMKQAVQRAQRFGAKGVRVQVSGRLGGSEMSRREWDRWGRVPLHTLRADIDYGQTEAHTTYGVIGVKVWVYRGDFTPDGRSPEEVAAEQRQPDRRGPRAT	1024
rpsC_lf.cluster1633	3	Ga0577630_0196902_543_1259	Ga0577630_0196902	1	MGQKVNPIGFRLGVIRSWDSKWYEEKNYAKWLHEDIRLREYVKKKLGQAGISKVEIERAASKVKVNVHTARPGIVIGKRGAGIESIKKELQQFTQNEVFLNIVEVRKAETDAQLVAENITTQLERRIAFRRAMKKAIQTAQKFGAKGIRVACSGRLGGAEMARYEWYREGRVPLHTLRADIDYGFAEAKTTYGKIGCKVWIFRGEVLPESAGAEKRSAQGRQAPARIGTGGATPTPVQ	1725
rpsC_lf.cluster1634	3	Ga0480586_0002534_833_1549	Ga0480586_0002534	1	MGQKVNPIGFRLGVIRSWDSKWYEEKNYARWLHEDIKLREYVKKKLGQAGISKVEIERAANKVKVNVHTARPGIVIGKRGAGIEQIKKELQQFTQNEVFLNIVEVRKAETDAQLVAENITTQLERRIAFRRAMKKAIQTAQKFGAKGIRVACSGRLGGAEMARYEWYREGRVPLHTLRADIDYGFAEAKTTYGKIGCKVWIFRGEVLPEGTAAEKASPRAAARPAPARTSAATPTPVQ	6345
rpsC_lf.cluster1635	4	Ga0577622_0000010_197278_197994	Ga0577622_0000010	1	MGQKVNPIGFRLGVIRSWDSKWYEEKNYAKWLHEDIHLREYVKKKLGQAGISKVEIERAASKVKVNVHTARPGIVIGKRGAGIESIKKELQAFTQNEVFLNIVEVRKAETDAQLVAENITTQLERRIAFRRAMKKAIQTAQKFGAKGIRVACSGRLGGAEMARYEWYREGRVPLHTLRADIDYGFAEAKTTYGKIGCKVWIFRGEVLPEGTITATSEKKPLPRPPRVATGGSTPTPVQ	240591
rpsC_lf.cluster1636	2	Ga0577642_0009805_644_1360	Ga0577642_0009805	1	MGQKVNPIGFRLGVIRSWDSKWYEEKNYAKWLHEDIQLREYVKKKLGQAGISKVEIERAASKVKVNVHTARPGIVIGKRGAGIESIKKELQQFTQNEVFLNIVEVRKAETDAQLVAENITTQLERRIAFRRAMKKAIQTAQKFGAKGIRVACSGRLGGAEMARYEWYREGRVPLHTLRADIDYGFAEAKTTYGKIGCKVWIFRGEVLPEGSATLPEKGKPLPRPTRVATGGATPTPVQ	7797
rpsC_lf.cluster1637	1	Ga0480446_0175499_364_1077	Ga0480446_0175499	1	MRVGYIHEWKSNWFNSRHFADYLAEDVRIREYITQKLAHAGLSNITIRKDSGELEVNIHTARPGIVIGKAGSEVDALRRELHRMTNKQIKVNILEIKRPELDAALVAQSIAEQLQNRVAFRRAMKRALTSAMRSGAKGVKVQVAGRLGGAEMARTESYSDGRVPLHTMRADIDYGFYEARTTFGRIGVKCWVNKGEIMPEGYTGADLTDMTAPPPPPRPSRPSRPSRPSLGGDRGGRG	1078
rpsC_lf.cluster1638	7	Ga0577619_00000744_5249_5965	Ga0577619_00000744	1	VGQKVNPNGFRLGIIKPWHARWYADKGYMQLVQEDREIRELILTRHTNAGVASVDIDRSANNVTVSIHTARPGIIIGKSGQNVEQLRQMLEGRTGKKVKVNIIEVRQPDINATLVARNIADQLEKRVSFRRAMKQALQRGMERGAKGIKVTVAGRLGGAEMSRRETDRRGRVPSQTLRADIEFGRAEALTTYGVIGVKVWVYRGDVLTGPQPTPISDQAAAEPPPPPPAPAPAAPVEA	33113
rpsC_lf.cluster1639	1	Ga0480452_0000988_12964_13680	Ga0480452_0000988	1	MGQKINPTGFRLSVNRDWASKWYANSKHFPATLNEDIKVRDYLRKKLAHASVGKITIERPAKNARITIHSARPGVVIGKKGEDIETLRASLRKMMGTEVGLNIEEIRKPEIDAQLVADSIAQQLEKRIMFRRAMKRAMQNAMRLGAQGIKIMSSGRLNGIEIARTEWYREGRVPLHTLRADIDYGFAEAKTTYGVIGIKVWVFKGEVLPHNAEPQAAPAPEAPKRARKSAGAKNVAAS	17448
rpsC_lf.cluster164	5	Ga0577619_00536118_694_1722	Ga0577619_00536118	1	LGHKVHPNAFRLGVFRPWEANWFANPKDYTKMLHEDLQMRSAILTRLRNAGIAKIETERSSNAQLTVTIHTAKPGIVIGKGGSSVDQLREDLEKRFGNRVRISIQEIKQPELNAQLVAENIASQIERRISYKRAMKQAILRTMRAGAKGVRIYCGGRLRGAEMARREWDREGRVPLHTLRADIDFGRATAKTTFGAIGVKCWIYKDQVSPKARLPITDGAPIGDAIAPQPEAPVDVAPQPVAVVETAPVEVVTAPVSAEVAAPAAEPKRVRTGAAAAKPKAEVAAAAKPKPEVATATKPVRTAAKTADKPAAKAKTAAAPKAEKAPPTKKAPAKKATEKKTK	1913
rpsC_lf.cluster1640	10	Ga0480447_024180_402_1118	Ga0480447_024180	1	MGQKVNPIGFRLGVIRSWDSKWYEEKNYAKWLHEDIKLREYVKKKLGQAGISKVEIERAANKVKVNVHTARPGIVIGKRGAGIEQIKKELQQFTQNEVFLNIVEVRKAETDAQLVAENITTQLERRIAFRRAMKKAIQTAQKFGAKGIRVACSGRLGGAEMARYEWYREGRVPLHTLRADIDYGFAEAKTTYGKIGCKVWIFRGEVLPESAAEAKKSPQQRGAPSRVTTGGATPTPVQ	1276
rpsC_lf.cluster1641	4	Ga0577617_0226839_351_1067	Ga0577617_0226839	1	MGQKVNPIGFRLGVIRSWDSKWYEEKNYAKWLHEDIRLREYVKKKLGQAGISKVEIERAANKVKINVHTARPGIVIGKRGAGIESIKKELQAFTQNEVFLNIVEVRKAETDAQLVAENITTQLERRIAFRRAMKKAIQTAQKFGAKGIRVACSGRLGGAEMARYEWYREGRVPLHTLRADIDYGFAEAKTTYGKIGCKVWIFRGEVLPEGAGAEKRSAQGRQAPARVGTGGATPSPVQ	1950
rpsC_lf.cluster1642	3	Ga0577642_0472491_155_871	Ga0577642_0472491	1	MGQKVNPIGLRLGINRTWDSRWFSRKEYGNQLLDDLSLRRFLGRRLTQAAISRVLIERAAKKTRITLHSARPGVVIGKKGADIDKLRSDIAKVTNSEVSLNIVEIRKPEIEAKLIAEGIAQQLERRVAFRRAMKRAVQSAMRFGAQGIRINCSGRLGGAEIARMEWYREGRVPLHTLRADVDYGHATAKTTYGTCGVKVWVFKGEILAHDPMAQDKRLAEGQAAGGGERSGGRRERAE	1238
rpsC_lf.cluster1643	1	Ga0577639_0479340_42_758	Ga0577639_0479340	1	MGQKINPIGFRLSVNRNWSSKWFANTKNFPGMLLEDIKVREYLKKKLSHAAVGKVVIERPAKNARITIYSARPGVVIGKKGEDIEGLRTALQRLMGVPVHVNIEEIRKPELDAQLISDSITSQLEKRVMFRRAMKRAMQNAMRLGAQGIKITSSGRLNGAEIARTEWYREGRVPLHTLRADIDYGFSEARTTYGTIGVQVLVFKGEVLGKGEQPAAPAPEPEKKPAARKPGVRNAAAS	1217
rpsC_lf.cluster1644	2	Ga0577641_0084376_2266_2979	Ga0577641_0084376	1	MGQKVHPESLRVGYIHDWKSNWFSEKQFSDYLDEDVRIRDHITGKLAHAGLSDITIRKDANEVEVNIHTARPGIVIGKSGSEVDALRKDLHRMTRKQIKVNILEIKRPELDAKLVAQSIAEQLQNRVAFRRAMKRALTSAMRSGAKGVKVQVSGRLGGAEMARTEGYSDGRVPLHTLRADIDYGFYEARTTFGRIGVKCWINKGEIMPEGYSGQDLTELEAPSTPSAPGGGGRGGGPG	2979
rpsC_lf.cluster1645	1	soilwarming_3_heated_30-45_052018_S28_2508_6	soilwarming_3_heated_30-45_052018_S28_2508	1	DELEKITGKRVRVTIQEIKKPELAAQLVAENVAAQLEKRIAFRRAIKQSLMKTMRAGAQGVKIRVKGRLGGSEMARVEWNREGRVPLHTLKADIDFGQTEAKTTFGRIGVSAWVYTGNFPTEAAVKPPTAVEEPVESGVPVGVAIGEAPSPLAELVQVAVPAAAPEAAPATSAPVTADVPAAKPKRAARATKATTAEAPTADAGEKAAPKRTTRARATTADKADAPKAPRARAQKKKE	2392
rpsC_lf.cluster1646	1	Ga0577632_0170638_753_1469	Ga0577632_0170638	1	MGQKVNPIGLRLGVNRTWDSRWFAGRTEYGKLLHEDMAIRATLMKNLKQAAISKIVIERPHKKCRVTIHSARPGVVIGKKGADIDKIRKIVAKMTQSEVLINIVEVRKPEIDAVLVADSIGQQLERRVAFRRAMKRAVQSAIRLGAEGIRINCSGRLGGAEIARLEWYREGRVPLHTLRADVDYGTATAHTAYGTCGIKVWIFKGEILEHDPMAQDRKMAEQEHSGGGERRRRERDAA	2208
rpsC_lf.cluster1647	4	Ga0577615_0094409_1667_2380	Ga0577615_0094409	1	MGQKVNPIGFRLGVIRSWDSKWYEEKNYAKWLHEDIRLREYVKKKLGQAGISKVEIERAASKVKVNVHTARPGIVIGKRGAGIESIKKELQAFTTNEVFLNIVEVRKAETDAQLVAENITTQLERRIAFRRAMKKAIQTAQKFGAKGIRVACSGRLGGAEMARYEWYREGRVPLHTLRADIDYGFAEAKTTYGKIGCKVWIFRGEVLPEGSTASLTEKSKATPRPSRAPSATPSPVQ	3172
rpsC_lf.cluster1648	2	soilwarming_3_unheated_50-60_052016_S38_8029_2	soilwarming_3_unheated_50-60_052016_S38_8029	1	MGQKVNPIGLRLGINRTWDSRWFSRKEYGNQLLDDLSLRRFLGRRLTQAAISRVLIERAAKKTRITLHSARPGVVIGKKGADIDKLRSDIAKVTNSEVSLNIVEIRKPEIEAKLIAEGIAQQLERRVAFRRAMKRAVQSAMRFGAQGIRINCSGRLGGAEIARMEWYREGRVPLHTLRADVDYGHATAKTTYGTCGVKVWVFKGEILAHDPMAQDKRLAEGQAAGGERSGGRRERAE	2787
rpsC_lf.cluster1649	1	Ga0577625_0108260_604_1317	Ga0577625_0108260	1	MGQKINPVGFRLSVNRNWGSKWFANTKNFPGMLAEDIKVREYLKKKLSHAAVGKVVIERPSKNARITIYSARPGVVIGKKGEDIEGLRNALQKLMGVPVHVNIEEIRKPELDAQLIADSITGQLEKRVMFRRAMKRAMQNAMRLGAQGIKITSAGRLNGAEIARTEWYREGRVPLHTLRADIEYGFSEAHTTYGTIGVQVLVFKGEILGKGEQPAAPPPEAERKPARKPGVKHAAAS	2823
rpsC_lf.cluster165	4	Ga0577643_00344558_403_1431	Ga0577643_00344558	1	VGHKVHPNAFRLGPFRSWEANWFATDKDYTKLLHEDLDMRRLILSRLRNAGIARIETERSSNAQMTVTIHTAKPGIVIGKGGASVDQLREDLEKRFGNRVRISIQEIKQPELDAQLVAENIASQIERRISHRRAMKQSILRTMRAGAKGVRIGMAGRLRGGEMARRESDHEGKVPLHTLRADIKFGRATARTTYGVIGVKVWIYKDLMKARTRGGQQQDELYPQPQAEGRQPAPERSGQAAPAVPSGTQAEAPAVNPGAPAVAGETVRQQVSSERGGGSQRRRSPRTEGGSSAETRPQAPRSSRPAEQPASPGAAPQDQSKETTSQAEPGTPAVEENGGAPA	1904
rpsC_lf.cluster1650	3	Ga0577630_0023400_1445_2158	Ga0577630_0023400	1	MGQKINPIGFRLSVNRNWGSKWFANTKNFPGMLAEDIRVREYLKKKLSHAAVGRVVIERPSKNARITIYSARPGVVIGKKGEDIEGLRNALQKLMGVPVHVNIEEIRKPELDAQLIADSITGQLEKRVMFRRAMKRAMQNAMRLGAQGIKITSAGRLNGAEIARTEWYREGRVPLHTLRADIEYGFSEARTTYGTIGVQVLVFKGEVLGKGEQPAAPPPEAEKKPARRPGVKHAAAS	4703
rpsC_lf.cluster1651	4	Ga0577619_00735766_590_1303	Ga0577619_00735766	1	MGQKVNPIGIRLGITRDWSSKWYAGSKTFASNIHTDFLVRQYLMKKLADASVSRIHIERAARRANITIHTARPGIVIGKKGEDIEKLRTAVAKILGMTMQDVRLNIAEIRKPELDAKLVAEGISQQLEKRVMFRRAMKRAVTNTMRSGALGIKVRISGRLNGSEIARTETNREGRVPLHTFRADIDYGLAEAQTTYGVIGIKVWIFKGEVFDQPEAEAPEAETDAAVPTPAAAPAAG	1596
rpsC_lf.cluster1652	4	Ga0577625_0020486_3758_4471	Ga0577625_0020486	1	MGQKINPIGFRLSVNRNWSSKWFANTKNFPGMLLEDIRVREYLEKKLSHAAVGKIVIERPSKNARITIYSARPGVVIGKKGEDIEGLRTALQKLMGVPVHVNIEEIRKPELDAQLIADSITGQLEKRVMFRRAMKRAMQNAMRLGAQGIKITSAGRLNGAEIARTEWYREGRVPLHTLRADIEYGFSEARTTYGTIGVQVLVFKGEVLGKGEQPAAPAPEPEKKPSRKPGVRNAAAS	6584
rpsC_lf.cluster1653	1	Ga0577625_0723508_136_849	Ga0577625_0723508	1	MGQKINPVGFRLSVNRNWGSKWFANTKNFPGMLAEDVKVREYLKKKLSHAAVGKVVIERPSKNARITIYSARPGVVIGKKGEDIEGLRTALQKLMGVPVHVNIEEIRKPELDAQLIADSITSQLEKRVMFRRAMKRAMQNAMRLGAQGIKITSAGRLNGAEIARTEWYREGRVPLHTLRAEIEYGFSEAKTTYGTIGVQVLVFKGETLGKGEQPVAPPPEPEKKPARKPGVKHAAAS	1029
rpsC_lf.cluster1654	11	soilwarming_heated_60-80_052018_S20S25S30_176184_2	soilwarming_heated_60-80_052018_S20S25S30_176184	1	MGQKINPIGFRLSVNRNWASKWFANTKNFPGMLLEDVKVREYLKKKLSHAAVGKVVIERPSKNARITIYSARPGVVIGKKGEDIEGLRTALQKLMGVPVHVNIEEIRKPELDAQLIADSITGQLEKRVMFRRAMKRAMQNAMRLGAQGIKITSAGRLNGAEIARTEWYREGRVPLHTLRADIEYGFSEARTTYGTIGVQVLVFKGEVLAKGEQPAAPPPEAEKKPRGKPGVKHAAAS	1132
rpsC_lf.cluster1655	1	Ga0577625_0333987_811_1524	Ga0577625_0333987	1	MGQKINPVGFRLSVNRNWGSKWFANTKNFPGMLLEDVKVREYLKKKLSHAAVGKVVIERPAKNARITIYSARPGVVIGKKGEDIEGLRNTLQKLMGVPVHVNIEEIRKPELDAQLIADSITGQLEKRVMFRRAMKRAMQNAMRLGAQGIKITSAGRLNGAEIARTEWYREGRVPLHTLRADIEYGFSEARTTYGTIGVQVLVFKGEILGKGEQPAAPPPEPEKKPSRKPGVRNAAAS	1572
rpsC_lf.cluster1656	3	Ga0577627_0065682_2665_3378	Ga0577627_0065682	1	MGQKIHPGGFRVGYIQNWKSNWFDEKGFADVLEEDLKIRSHIEGKLAHAGLSSITIERRGEVSVDIHTARPGIVIGKSGSEVDALRKELHKLTGKPVKVNIREVKRPELDAKLVAQSIAEQLQNRVAFRRAMKRALTSAMRSGAKGVKLQVSGRLGGSEMARTESYSDGRVPLHTLRANIDYGFFEARTTAGRIGVKCWINKGEVMPEGFRSDQVPADGEPQGGGRRDRGGRGGGGR	4157
rpsC_lf.cluster1657	2	Ga0480585_0200278_331_1044	Ga0480585_0200278	1	MGQKINPVGFRLSVNRNWGSKWFANTKNFPGMLAEDIKVREYLKKKLSHAAVGRVVIERPSKNARITIYSARPGVVIGKKGEDIEGLRTALQKLMGVPVHVNIEEIRKPELDAQLIADSITGQLEKRVMFRRAMKRAMQNAMRLGAQGIKITSAGRLNGAEIARTEWYREGRVPLHTLRADIEYGFSEARTTYGTIGVQVLVFKGEVLGKGEQPATPPPEPEKKPSRKPGVRNAAAS	1110
rpsC_lf.cluster1658	4	soilwarming_3_unheated_10-30_052018_S12_26511_3	soilwarming_3_unheated_10-30_052018_S12_26511	1	MGQKINPVGFRLSVNRNWGSKWFANTKNFPVMLLEDVKVREYLKKKLSHAAVGKVVIERPSKNARITIYSARPGVVIGKKGEDIEGLRTALQKLMGVPVHVNIEEIRKPELDAQLIADSITGQLEKRVMFRRAMKRAMQNAMRLGAQGIKITSAGRLNGAEIARTEWYREGRVPLHTLRADIEYGFSEARTTYGTIGVQVLVFKGEVLGKGEQPATPPPEPEKKPSRKPGVRNAAAS	1339
rpsC_lf.cluster1659	1	Ga0577615_0006186_4609_5322	Ga0577615_0006186	1	MGQKVNPIGIRLGITRDWTSKWYAGSKTFASNIHTDFLVRKYLMKKLADASVSRIHIERAARRANITIHTARPGIVIGKKGEDIEKLRTAVAKILGMTMQDVRLNIAEIRKPELDAKLVAEGISQQLEKRVMFRRAMKRAVTNTMRSGALGIKVRISGRLNGSEIARTETNREGRVPLHTFRADIDYGLAEAQTTYGVIGIKVWIFKGEIFDQPEAEAPEAETEAAKPVEAAAPAQS	9742
rpsC_lf.cluster166	2	Ga0480585_0227721_14_1039	Ga0480585_0227721	1	MGHKVHPGGLRVGIIHTWKSNWFTTDKDFAGYLAEDFKIRDHIYGKLSHAGLSDIHIRKDKQKITVDIYTARPGIVIGKSGSEVDALRKELHDMTGKAVQVNITEIKRPELDAKLVAQSIAEQLQNRVSFRRAMKRSLSSSMRSGAQGVKIRCGGRLGGSEMSRSEQYSEGRVPLHTLRADIDYGFAEAKTTFGRIGVKVWINKGEIMPEGFERDSAGTRLGEVDTRRRRGGRPGDAEQLGPARPQRRGGGGGGGGGGGGGGGAGGGRGRRPRGGGGPPGGGGGAGGGGAPEAAPGAGGRRARPKPQTEGQEAPKTRAPQAPAPDATPKPASDATPKPASDA	1041
rpsC_lf.cluster1660	17	Ga0577634_0031352_177_890	Ga0577634_0031352	1	MGQKVNPIGFRLGVIRSWDSKWYEEKNYAKWLHEDIRLRDYVKKKLGQAGISKVEIERAANKVKVNVHTARPGIVIGKRGAGIESIKKELQQFTQNEVFLNIVEVRKAETDAQLVAENITTQLERRIAFRRAMKKAIQTAQKFGAKGIRVACSGRLGGAEMARYEWYREGRVPLHTLRADIDYGFAEAKTTYGKIGCKVWIFRGEVLPETASADKASGKSARPAPARAAASTPTPVQ	6318
rpsC_lf.cluster1661	2	Ga0577637_0005179_621_1334	Ga0577637_0005179	1	MGQKVNPIGFRLGVIRSWDSKWYEEKNYARWLHEDIRLREYVKKKLGQAGISKVEIERAASKVKVNVHTARPGIVIGKRGAGIESIKKELQQFTQNEVFLNIVEVRKAETDAQLVAENITTQLERRIAFRRAMKKAIQTAQKFGAKGIRVACSGRLGGAEMARYEWYREGRVPLHTLRADIDYGFAEAKTTYGKIGCKVWIFRGEVLPESATEAAKKPPARAPARVTTGGATPTPIQ	5860
rpsC_lf.cluster1662	3	soilwarming_heated_60-80_052018_S20S25S30_36896_6	soilwarming_heated_60-80_052018_S20S25S30_36896	1	FGNRVRISIQEIKQPELDAQLVAENIASQIERRISYKRAMKQAILRTMRSGAKGVRIYCGGRLRGAEMARREWDREGRVPLHTLRANIDFGRATASTTFGAIGVKCWIYKDTVAPKKVIAAPEVMPLADVIAPQPELLEVLAETQAPVEITAPEPETVTATPAPRRARATTTATTTTTTSAKPAAKPKAAPKAKAEAKIEAKTKPAGRAQGAISIAKPKAEAKVPAKKSTTTKKTKS	2494
rpsC_lf.cluster1663	2	Ga0577625_0188341_1306_2019	Ga0577625_0188341	1	MGQKINPVGFRLSVNRNWGSKWFANTKNFPGMLLEDVKVREYLKKKLSHAAVGKVVIERPSKNARITIFSARPGVVIGKKGEDIEGLRNALQKLMGVPVHVNIEEIRKPELDAQLIADSITGQLEKRVMFRRAMKRAMQNAMRLGAQGIKITSAGRLNGAEIARTEWYREGRVPLHTLRADIEYGFSEARTTYGTIGVQVLVFKGEVLGKGEQPAAPPPEPERKPSRKPGVRNVAAS	2123
rpsC_lf.cluster1664	6	soilwarming_unheated_45-60_052018_S4S9S14_47125_5	soilwarming_unheated_45-60_052018_S4S9S14_47125	1	MGQKVNPIGFRLGIIRSWDSKWYEEKNYAKWLHEDIHLREYVKKKLGQAGISKVEIERAASKVKVNVHTARPGIVIGKRGAGIESIKKELQQFTQNEVFLNIVEVRKAETDAQLVAENITTQLERRIAFRRAMKKAIQTAQKFGAKGIRVACSGRLGGAEMARYEWYREGRVPLHTLRADIDYGFAEAKTTYGKIGCKVWIFRGEVLPEGSTASLTEKSKATPRPTRSPSATPTPVQ	2522
rpsC_lf.cluster1665	2	Ga0577639_0000979_7411_8124	Ga0577639_0000979	1	MGQKVNPIGFRLGVIRSWDSKWYEEKNYARWLHEDIKLREYVKKKLGQAGISKVEIERAANKVKVNVHTARPGIVIGKRGAGIEQIKKELQQFTQNEVFLNIVEVRKAETDAQLVAENITTQLERRIAFRRAMKKAIQTAQKFGAKGIRVACSGRLGGAEMARYEWYREGRVPLHTLRADIDYGFAEARTTYGKIGCKVWIFRGEVLPEGAAEKLAPQRPARATPSRAPSATPTPVQ	13825
rpsC_lf.cluster1666	4	Ga0577625_0562046_39_752	Ga0577625_0562046	1	MGQKTSPVGLRLQINRTWDSRWFAEGQDYGRLLLEDLKIRKYIIKKVPQAAISKVVIERPAKICRISIYAARPGVIIGKKGADIEKLKKELSRMTGSEVSLNIVEIRKPEIDAKLVAQGVADQLERRIAFRRAMKRAVQSALRLGAEGIRITCSGRLGGAEIARTEWYREGRVPLHTLRGNVDYAEATAHTAYGVCGVKVWVFKGEILGHDPLAQDRLMMEAQTSGVRPAREERGNR	1185
rpsC_lf.cluster1667	1	Ga0577634_0398627_1007_1720	Ga0577634_0398627	1	VASQLEKRIAFRRAIKQSIMRTMRAGARGVRIQVSGRLGGSEMSRREWDRDGRVPLHTLRANIDYGVAEARTTFGRIGVQVWIYKGDFVTATGEPIAADGSQRTAQRDDDSSPGDGLATAPGGGDTAPRSRRPAAATPVVSEPAPQPVEAPVATAAPELAEGATAMNVDADADAEAELETDTDVDDDTEAVTVPEDSEVAPKRVPVKSKKATTARKPTTTRKPATKAKAKPAGEEEE	1728
rpsC_lf.cluster1668	9	soilwarming_heated_60-80_052018_S20S25S30_76436_4	soilwarming_heated_60-80_052018_S20S25S30_76436	1	MGQKINPVGFRLSVNRNWGSKWFSNTKNFPGMLLEDIKVREYLKKKLSHAAVGKVVIERPSKNARITIFSARPGVVIGKKGEDIEGLRNTLQKLMGVPVHVNIEEIRKPELDAQLIADSITGQLEKRVMFRRAMKRAMQNAMRLGAQGIKITSAGRLNGAEIARTEWYREGRVPLHTLRADIEYGFSEARTTYGTIGVQVLVFKGEILGKGEQPAAPPPEAEKKPARKPGVKHAAAS	1740
rpsC_lf.cluster1669	1	Ga0577637_0216794_581_1291	Ga0577637_0216794	1	LSVTKYFIKDVSRRLEIDEHLALELKRAGYSHVELTKSPVGTRVVIYAAKPGMVIGRRGQSIRDLTKVLEDKFHIENPQLSVANIDVPEQDPKVVASQVASALQRGVHFRRAAYWALQRVMESQALGVEITIRGKLTTERSRFEKFKAGYLPRVGDPVLKSVKTAVADVQLKQGLFGINVRILPPQTSYIDKPIMLTPPADTTPPPAKPAKETEVVATPEVLTEALVEAEPQAEVAV	1291
rpsC_lf.cluster167	6	Ga0577627_0011625_6640_7665	Ga0577627_0011625	1	VGRKVHPNGFRLGVYRGWEANWFATDKDYLKLLHEDMDMRRLILKRLRNAGIARIETERSSNAQLTVTIHTAKPGIVIGKGGASVDQLREDLEKRFGNRVRISINEIKQPEMNAQLVAENIASQIERRISYRRAMKQSILRTMRAGAKGVRIAAGGRLRGSEMARREWDREGRVPLHTLRADIDFGRATARTTFGMIGVKCWIYKGLVPGRKRGGDLDSDVFPQPVDGATPAPAAAAPPAAAPVAPAPAPAIPAAVVAQAPAEAAAPEAPPVAAEAAAPVEAPPVAAEAAAPVEAPPVAAEAAAPETSAVPAAEEAPKAPRKRTTKPKAEPAAKEDTDAPA	8500
rpsC_lf.cluster1670	1	Ga0577630_0129099_23_736	Ga0577630_0129099	1	MGQKVNPIGIRLGITRDWTSKWYAHSKNFASNIHTDFLVRKYLMKKLADASVSRIHIERAARRANITIHTARPGIVIGKKGEDIEKLRTAVAKILGMTMQDVRLNIAEIRKPELDAKLVAEGISQQLEKRVMFRRAMKRAVTNTMRSGALGIKVRISGRLNGSEIARTETNREGRVPLHTFRADIDYGLAEAQTTYGVIGIKVWIFKGEIFDQPEAEAPEAETEAAKPVEAAVPAQS	2115
rpsC_lf.cluster1671	1	Ga0480455_00046059_3384_4097	Ga0480455_00046059	1	MGQKVNPIGFRLGINRTWDSRWYAGKREYGRLLQEDIKIRSHLSERLKQAGVSRIVIERPHKTCRITIHSARPGVVIGKKGADIEKLKNEVQKYTTDEVHLNIVEIRKPEIDAKLVAENIAQQLERRVAFRRVMKRAQQSAMRLGALGIRINCGGRLGGAEIARMEWYKEGKVPLHTLRADVDYGVATAKTTYGTCGVKVWIYKGEIMEHDPMAVEKRLAEASDQSRSSGQRAQAPA	5409
rpsC_lf.cluster1672	1	Ga0577620_0137503_385_1098	Ga0577620_0137503	1	MGQKINPIGFRLSVNRNWASKWFANTKNFPGMLLEDVKVREYLKKKLSHAAVGKVVIERPSKNARITIYSARPGVVIGKKGEDIEGLRTALQKLMGVPVHVNIEEIRKPELDAQLIADSITGQLEKRVMFRRAMKRAMQNAMRLGAQGIKITSAGRLNGAEIARTEWYREGRVPLHTLRADIEYGFSEAHTTYGTIGVQVLVFKGEVLGKGEQPAAPPPEPEKKPSRKPGVRNAAAS	1690
rpsC_lf.cluster1673	1	Ga0480452_0051437_92_805	Ga0480452_0051437	1	MGQKINPVGFRLSVNRNWGSKWFANTKNFPGMLAEDIKVREYLKKKLSHAAVGKVVIERPSKNARITIYSARPGVVIGKKGEDIEGLRNALQKLMGVPVHVNIEEIRKPELDAQLIADSITGQLEKRVMFRRAMKRAMQNAMRLGAQGIKITSAGRLNGAEIARTEWYREGRVPLHTLRADIEYGFSEAHTTYGTIGVQVLVFKGEVLGKGEQPAAPPPEAEKRPSRKPGVKHAAAS	2868
rpsC_lf.cluster1674	5	Ga0577627_0624353_431_1144	Ga0577627_0624353	1	MGQKINPVGFRLSVNRNWGSKWFANTKNFPGMLAEDIKVREYLKKKLSHAAVGRVVIERPSKNARITIYSARPGVVIGKKGEDIEGLRNALQKLMGVPVHVNIEEIRKPELDAQLIADSITGQLEKRVMFRRAMKRAMQNAMRLGAQGIKITSAGRLNGAEIARTEWYREGRVPLHTLRADIEYGFSEARTTYGTIGVQVLVFKGEILGKGEQPAAPPPEAEKKPARKPGVKHAAAS	1308
rpsC_lf.cluster1675	1	Ga0480587_0008690_2142_2855	Ga0480587_0008690	1	VAENIASQIERRISHRRAMKQSILRTMRAGAKGVRIGMAGRLRGGEMARRESDHEGKVPLHTLRADIKFGRATARTTYGVIGVKVWIYKDLMKSRTRGGQSQEEVFPQPQAEGRQPAPEAGGQAAPAVASGTHAEAPAVAPGAPAAAGEAVRQQVSAERGGSSPRRRSPRSEGAGGSARPATPRPAAGRSQPPERSVTPQEAVPHDESTETGTQAQPGSPAAEPGSPATEEDRGAPS	2870
rpsC_lf.cluster1676	1	soilwarming_1_unheated_30-45_052018_S3_2783_3	soilwarming_1_unheated_30-45_052018_S3_2783	1	MGQKVNPIGFRLGVIRSWDSKWYEEKNYAKWLHEDIRLREYVKKKLGQAGISKVEIERAASKVKVNVHTARPGIVIGKRGAGIESIKKELQQFTQNEVFLNIVEVRKAETDAQLVAENITTQLERRIAFRRAMKKAIQTAQKFGAKGIRVACSGRLGGAEMARYEWYREGRVPLHTLRADIDYGFAEARTTYGKIGCKVWIFRGEVLPEGAAAEKASPRAARPTPTRSSAATPTPVQ	4240
rpsC_lf.cluster1677	1	Ga0577615_0125868_560_1273	Ga0577615_0125868	1	MGQKTSPVGLRLQINRTWDSRWYAEGQDYGRLLLEDLKIRKYIIKRSPQAAISKVVIERPAKICRISIYAARPGVIIGKKGADIEKLKKELQKMTGSEVSLNIVEIRKPEIDAKLVAQGVADQLERRIAFRRAMKRAVQSALRLGAEGIRITCSGRLGGAEIARTEWYREGRVPLHTLRGNVDYAEATAHTAYGVCGVKVWVFKGEILGHDPLAQDRLMMEAQTSGVRPAREERGNR	2759
rpsC_lf.cluster1678	3	Ga0577620_0137942_116_829	Ga0577620_0137942	1	MGQKVNPIGFRLGVIRSWDSKWYEEKNYARWLHEDIKLREYVKKKLGQAGISKVEIERAANKVKINVHTARPGIVIGKRGAGIEQIKKELQQFTQNEVFLNIVEVRKAETDAQLVAENITTQLERRIAFRRAMKKAIQTAQKFGAKGIRVACSGRLGGAEMARYEWYREGRVPLHTLRADIDYGFAEAKTTYGKIGCKVWIFRGEVLPEGAAAEKASPRAARPAPTRSSAATPTPVQ	1687
rpsC_lf.cluster1679	27	Ga0577616_0162274_545_1258	Ga0577616_0162274	1	MGQKVNPIGFRLGVIRSWDSKWYEEKNYAKWLHEDIKLREYVKKKLGQAGISKVEIERAANKVKINVHTARPGIVIGKRGAGIEQIKKELQQFTQNEVFLNIVEVRKAETDAQLVAENITTQLERRIAFRRAMKKAIQTAQKFGAKGIRVACSGRLGGAEMARYEWYREGRVPLHTLRADIDYGFAEARTTYGKIGCKVWIFRGEVLPEGAAAEKASPRAARPTPTRSSAATPTPVQ	1871
rpsC_lf.cluster168	2	Ga0577621_0168363_720_1745	Ga0577621_0168363	1	MGQKIHPVGFRLPVTRNWASRWYASNQNFATMLAEDLKVREYLKIRLKSAAVSRILIERPAKNARITIFSARPGVVIGKKGEDIENLKAELTRRLGVPVAVNIEEVRKPEIDAQLIADSITQQLEKRIMFRRAMKRAMQNAMRLGAQGIKIMSSGRLNGIEIARCEWYREGRVPLHTLKADIDYGFSEAKTTYGVIGVKCWVYRGDRLAHGEAPGVQAPTQEEERRPRRPARPGAPGERRGPSGPSRGGDRDRGAPRQAAAQWLKGRTSPSRPAATRRRVRPSSGCARPQRLAPAKENKQCCNQHAENIARNRRAATPASPRAVPTCRSATSASRRPNGAV	1772
rpsC_lf.cluster1680	19	soilwarming_3_unheated_50-60_052016_S38_3017_6	soilwarming_3_unheated_50-60_052016_S38_3017	1	MGQKVNPIGFRLGVIRSWDSKWYEEKNYAKWLHEDIRLRDYVKKKLGQAGISKVEIERAANKVKVNVHTARPGIVIGKRGAGIESIKKELQQFTQNEVFLNIVEVRKAETDAQLVAENITTQLERRIAFRRAMKKAIQTAQKFGAKGIRVACSGRLGGAEMARYEWYREGRVPLHTLRADIDYGFAEAKTTYGKIGCKVWIFRGEVLPETAAAEKASGKAARPAPARAAASTPTPVQ	4223
rpsC_lf.cluster1681	1	Ga0577619_00488368_2_712	Ga0577619_00488368	1	MGQKVHPEAMRVGYIHDWKSNWFSDRNFAEYLAEDVRIREHIVRKLAHAGLSDITIRKDSGELEINIHTARPGIVIGKSGSEVDALRRELHRMTSKQIKVNILEIKRPELNASLVAQSIAEQLQNRVAFRRAMKRALTSAMRSGAKGVKVQVAGRLGGAEMARTESYSDGRVPLHTMRADIDYGFYEARTTFGRIGVKCWVNKGEIMPEGYTGSDLTDLTAPAAPSSDRDGRGGRGE	2016
rpsC_lf.cluster1682	2	Ga0577626_0319598_800_1513	Ga0577626_0319598	1	MGQKVNPIGFRLGVIRSWDSKWYEEKNYAKWLHEDIRLREYVKKKLGQAGISKVEIERAASKVKVNVHTARPGIVIGKRGAGIESIKKELQQFTQNEVFLNIVEVRKAETDAQLVAENITTQLERRIAFRRAMKKAIQTAQKFGAKGIRVACSGRLGGAEMARYEWYREGRVPLHTLRADIDYGFAEAKTTYGKIGCKVWIFRGEVLPESAAEAKKTPARGAPTRVTTGGATPTPVQ	1926
rpsC_lf.cluster1683	1	Ga0577617_0537943_496_1209	Ga0577617_0537943	1	NPIGIRLGITRDWTSKWYAGSKTFASNIHTDFLVRKYLNKKLADASVSRIHIERAARRANITIHTARPGIVIGKKGEDIEKLRTAVAKILGMTMNDVRLNIAEIRKPELDAKLVAEGISQQLEKRVMFRRAMKRAVTNTMRSGALGIKVRISGRLNGSEIARTETNREGRVPLHTFRADIDYGVAEAQTTYGVIGIKVWIFKGEVFDQPEVEAVEADAEAAAATVAKPAETAAPAAG	1209
rpsC_lf.cluster1684	1	Ga0577631_0461717_3_713	Ga0577631_0461717	1	MGQKVNPIGLRLGVNRTWDSRWYANTGEYGRLLHEDIKIRKVLRERLAGAGISRIVIERPHKKCRVTIYTAKPGVVIGKKGGDIEKLRKDLADMVDGAEVFLNLVEVRKPETDATLVAEGVAQQLERRVAFRRAMKRAMQSTMRLGGQGIKISVSGRLGGAEIARTEGYLEGSVPLHTLRADIDYGFAEAHTAYGRIGVKVWIYKGEILEHDPMAQDKRLAESGEQRERRDRDRPPQ	1008
rpsC_lf.cluster1685	1	Ga0480478_011008_287_1000	Ga0480478_011008	1	MGQKVNPVGLRLGINRTWDSRWYANKSEYAKLLHEDIKIREVLMKTLKQAAVSKIIIERPHKKCRVTIYSARPGVVIGKKGADIDKIRKTVAKLTDSEVVINIVEVRKPEIDATLVADSIAQQLERRVAFRRAMKRAVQSAMRLGAEGIRINCSGRLGGAEIARLEWYREGRVPLHTLRADVDYGTATAHTAYGTCGIKVWIFKGEILEHDPMAQDKKMAEQDHGGGDRRRRDRDAA	2686
rpsC_lf.cluster1686	1	Ga0577628_0013456_2034_2747	Ga0577628_0013456	1	MGQKVNPIGFRLGVIRSWDSKWYEEKNYAKWLHEDIKLREYVKKKLGQAGISKVEIERAANKVKVNVHTARPGIVIGKRGAGIEQIKKELQQFTQNEVFLNIVEVRKAETDAQLVAENITPQLERRIAVRRAMKKAIQTAQKFGAKGIRVACSGRLGGAEMARYEWYREGRVPLHTLRADIDYGFAEARTTYGKIGCKVWIFRGEVLPEGAAAEKASPRAARPTPTRSSAATPTPVQ	4177
rpsC_lf.cluster1687	1	Ga0577620_0133557_667_1380	Ga0577620_0133557	1	MGQKVNPIGLRLGMNRTWDSRWYANSREYGKLLHEDMGIRNYLKTELKQAGVAKVLIERPHKKCRVTIYSARPGVVIGKKGADIEKLRKKVADMTGSEVHLNIVEIRKPETDATLVAESIAQQLERRVAFRRAMKRSVQSAQRMGAEGIKITCSGRLGGAEIARVEWYREGRVPLHTLRADIDYGVATAHTAYGTNGVKVWIFKGEILEHDPMAQDKRMAETPDSGQRPRRDRDGAN	1716
rpsC_lf.cluster1688	1	Ga0577632_0345346_782_1492	Ga0577632_0345346	1	EEKNFADVLQEDLQIRDHIVKKLSHAGLSDITIERRGEVAVDIHTARPGIVIGKSGSEVDALRKELHKLTGSPVKVNIREVKRPELDAKLVAQSIAEQLQNRVAFRRAMKRALTSAMRSGAKGVKVQVSGRLGGAEMARTESYSDGRVPLHTLRADIDYGFFEARTTTGRIGVKCWINKGEVMPEGFRSDLISNDEPPSGGGGRGRDGGGRGRDGGGRGRDGGPGGGGGGRRGGGR	1492
rpsC_lf.cluster1689	3	Ga0577630_0112375_1071_1781	Ga0577630_0112375	1	MGQKVNPIGLRLGINRTWDSRWFAGKGEYGRLLHEDIKIRGFLMTQLKQAAVAKIIIERPHKKCRVTIHSARPGVVIGKKGADIDKLRKQVAKMTDSEVIINIVEIRKPEVDAKLVAESIAQQLERRVAFRRAMKRAVQSAMRLGAEGIRINCGGRLGGNEIARMEWYREGRVPLHTLRADVDYGTATAFTTYGTCGVKVWIFKGEILEHDPMAQDKRLAESESGGGGRHRPRDAA	2260
rpsC_lf.cluster169	4	Ga0577638_0009936_8553_9578	Ga0577638_0009936	1	MGQKVHPESLRVGYIHDWKANWFNERSFADYLYEDIQIRGHIIGRLSHAGLSDITIRKNATEVEVNINTARPGIVIGKSGSEVDQLRRDLHRITGKQVKVNILEIKRPELDARLVAQSIAEQLQNRVAFRRAMKRALTSAMRSGAKGVRVQVSGRLGGAEMARTEGYSDGRVPLHTLRADIDYGFHEARTTFGRIGVKCWINKGEIMPEGYTGAELTSMDEPAPMASERGGRGGRDGRGRGGGPGGGRDGRGRGGGERGGPGGRGGPGRGPRRREPEAAGRGESTDAPGAPRGGEAGRAESEGSSRGGSRPAGRGRRPRGSSGGPTQSNRGGTEGGRQEGS	12055
rpsC_lf.cluster1690	18	Ga0480449_0049719_310_1020	Ga0480449_0049719	1	MGQKIHPTGFRLSVQRNWTSRWYSNSKNFPAMLQEDIKVRDFLKKKLAHAAVSKVVIERPAKNAKITVYSARPGVVIGKKGEDIEHLRGELQKLMGVPVHVNIEEVRKPEIDAQLIADSIAQQLEKRIMFRRAMKRAIQNAMRLGAQGIKIMSAGRLNGIEIARTEWYREGRVPLHTLRADIDYGFSEAKTTYGVIGIKVWVFKGEVLGRGEQPVVAPAPEPEKKGRRGARNAAAS	3187
rpsC_lf.cluster1691	9	Ga0577615_0031693_3186_3896	Ga0577615_0031693	1	MGQKIHPTGFRLSVQRNWTSRWYSNTKNFPAMLQEDIKVRDFLKKKLAHAAVSKVVIERPAKNAKITVYSARPGVVIGKKGEDIEHLRAELQKLMGVPVHVNIEEVRKPEIDAQLIADSIAQQLEKRIMFRRAMKRAIQNAMRLGAQGIKIMSAGRLNGIEIARTEWYREGRVPLHTLRADIDYGFSEAKTNYGVIGIKVWVFKGEMLGRGEQPVVAPAPEPERKARRGARNAATS	5163
rpsC_lf.cluster1692	20	soilwarming_2_unheated_30-45_052018_S8_15042_1	soilwarming_2_unheated_30-45_052018_S8_15042	1	MGSPEELVMGQKVNPIGFRLGVNRDWRARWYASPQELPAFLHSDLEIRSYVKKKLQFAAVSKIVMERAWNSIRVTIHTARPGIVIGRKGAEIEKMTEEISKMAQGKQIKIDIQEIKAPELDAQLVAENVALQIERRIAYRRAMKKAVQTAMDFGAQGIRLRCSGRLNGAEISRSEWYREGKVPLHTLRTGIDYGFAEANTVYGKIGVKCWMCKKEEATEPAGPTLPPPPPLVPEEV	1580
rpsC_lf.cluster1693	1	Ga0577621_0285896_1_711	Ga0577621_0285896	1	EVDAKLVAESVASQLEKRIAFRRAIKQSIMRTMRAGAKGVKIQVSGRLGGSEMSRREWDRDGRVPLHTLRANIDYGQAEARTTFGRIGVTVWIYKGDFVTATGEPILPGGDGRAREDGGEGAPERPRRTPAARPEPARAAAPSVPAPEPVVAAAPAAVVAEVEVEVDDEPDTELDVVDDLPDELADVDLSGIDIPDPDAVKGGGDIPKRAPARRKPPVTRKPGAPPKAVVPDAEEE	1339
rpsC_lf.cluster1694	3	Ga0480588_0246079_3_710	Ga0480588_0246079	1	MGQKVHPEAMRVGYIHDWKSNWFSEKNFSDYLAEDIHVREHITNKLAHAGLSDITIRKDANELEVNIHTARPGIVIGKSGSEVDALRRDLHQMTKKQIKVNILEIKRPELDAKLVAQSIAEQLQNRVAFRRAMKRALTSAMRSGAKGVKVQVSGRLGGAEMARTESYSDGRVPLHTMRADIDYGFYESRTTFGRIGVKCWVNKGEIMPEGYTGTDLTDMTAPAQQSSDRDGRGGRE	1117
rpsC_lf.cluster1695	2	Ga0480584_0080221_799_1509	Ga0480584_0080221	1	MGQKCNPIGLRLGINRTWDSRWYASKREYGKLLQEDIKIRYYLLDKLKQAGVSRIFIERPHKKCRVTIHSARPGVVIGKKGADIEKLKTDLGKFTDSEVHLNIVEIRKPEIDAKLVADNIGQQLERRVAFRRAMKRAVQSAMRLGAQGIRINCTGRLGGAEIARVEWYREGRVPLHTLRADIDYGVCTAKTTYGTCGVKVWVFKGEIMEHDPMAQDKRLNEAAESASRGGRPQPAA	1891
rpsC_lf.cluster1696	44	Ga0577633_0350648_518_1228	Ga0577633_0350648	1	MGQKVNPIGFRLGVIRSWDSKWYEEKNYAKWLHEDIHLREYVKKKLGQAGISRVEIERAANKVKVNVHTARPGIVIGKRGAGIESIKKELQAFTQNEVFLNIVEVRKAETDAQLVAENITTQLERRIAFRRAMKKAIQTAQKFGAKGIRVACSGRLGGAEMARYEWYREGRVPLHTLRADIDYGFAEAKTTYGKIGCKVWIFRGEVLPEAAAAEKRSAQGRHTPPRSSSSTPTPVQ	1713
rpsC_lf.cluster1697	2	soilwarming_1_unheated_30-45_052018_S3_26364_3	soilwarming_1_unheated_30-45_052018_S3_26364	1	MTHTVHPYAHRLGIIRDWRSRWFAGDKKSFRENIAVDQSVRAFLKKKLRNMHLAEIEIERTATELRVILHTARPGLVIGRSGENATKLRKELTQVVTKAASKHGRAVKLDIMEIRQPETSASVVGMMVAEGLEKRMPFRRVLKGTVEKVMAVRDVIGVRIVISGRLGGADMSRTEQIKKGRIPLQTFRANIDYAHTEALLPYGVIGIKVWIYLGDQFTPDNTAAPRGEQANRGSAK	1554
rpsC_lf.cluster1698	5	Ga0577633_0005987_5572_6282	Ga0577633_0005987	1	MGQKVNPIGFRLGVIRSWDSKWYEEKNYAKWLHEDIRLREYVKKKLGQAGISKVEIERAASKVRVNVHTARPGIVIGKRGAGIESIKKELQAFTENEVTLNIVEVRKAETDAQLVAENITTQLERRIAFRRAMKKAIQTAQKFGAKGIRVACSGRLGGAEMARYEWYREGRVPLHTLRADIDYGFAEAKTTYGKIGCKVWIFRGEVLPEGAGAEKRSAQGRQAPARSSTATPSPVQ	12366
rpsC_lf.cluster1699	1	Ga0480452_0011594_768_1478	Ga0480452_0011594	1	MGQKVNPIGLRLGINRTWDSRWFARKGEYGQLLHEDMRIREALLKDLKQAAVSKIVIERPHKKCRVTIHSARPGIVIGKKGADIEKLRKKVGSMTSSEVHINIVEVRKPEVDAQLVSDSIAQQLERRVAFRRAMKRAVQSAMRLGAEGIRITCSGRLGGAEIARTEWYREGRVPLHTLRADIDYGVSTAHTAMGTCGVKVWIFKGEIMEHDPMAQDKRLSEGEQSTGRTRREREPA	5818
rpsC_lf.cluster17	2	Ga0577620_0004186_6759_7943	Ga0577620_0004186	1	MGQKIHPGGLRVGVIHPWKSNWYTGKKEFPQYLIEDIRIREHIYKKLAHAGLSDILIRKDKQRITVDIYTARPGIVIGKSGVEVDALRKELHGMTGKNVHININEIKRPELDAKLVAQSIAEQLQNRVSFRRAMKRALASAIRSGAAGVRIQCGGRLGGSEMSRSESYSEGRVPLHTIRADIDYGFVEAKTTYGRIGVKVWVNRGEIMPEGYEGVASGDGRADQDTARRRRGGASLEGLGASRESGRGRSGDREGLGPVRKRRPGGGGPGGAGGAGGAGGGRGRGGAGGGRGAGAPRSGGQRSGGGGAGGGGGGAGRARPQENVEKPRTDDTGTSAEGREQPVIEPQVETTPAPVADAPDTTTPKQQTEDPTKLDQSGDPSQEKPKRGGKGGDS	8776
rpsC_lf.cluster170	16	soilwarming_2_heated_45-60_052018_S24_3323_2	soilwarming_2_heated_45-60_052018_S24_3323	1	MGHKVHPNGFRLGVYRNWESKWFATDKEFSALLLEDVKLRKMLFARLKNAGVARIETERSSSALTITLHTAKPGIVIGKGGTSVDQLRDELEKMTKKRVRVTIQEIKKPELSAQLVAESVAAQLEKRIAFRRAVKQSLMKTMRAGAQGVKIRVKGRLGGSEMARIEWNREGRVPLHTLKADIDFGQTEAKTTFGRIGVSAWVYTGDFPTERPKKVAEEPTDGEVPVAAALAETPLVAEALGLPVAIPAEPVPVPVAVVEPEPEPEPAVSVPAAAAEPAARPARRRTTATATAPSEAPAKPRRAPRAVKATTEEAAPKQKRATRATSAEPKPATRRTAKKKE	2234
rpsC_lf.cluster1700	1	Ga0577630_0422294_122_832	Ga0577630_0422294	1	MGQKIHPIGFRLSVQRNWTSRWYSNSKNFPGMLHEDIKVRDFLKKKLAHAAVSKVVIERPAKNAKITVYSARPGVVIGKKGEDIENLRGQLQKLMGVPVHVNIEEVRKPEVDAQLIADSIAQQLEKRIMFRRAMKRAIQNAMRLGAQGIKIMSAGRLNGIEIARTEWYREGRVPLHTLRADIDYGFSEAKTTYGVIGIKVWVFKGELLGRGEQPVAAPAPEPERKARRGAKNAATS	1173
rpsC_lf.cluster1701	1	Ga0577630_0384440_410_1120	Ga0577630_0384440	1	MGQKVNPIGLRLGINRTWDSRWFAAKGQYGRLLHEDIKIRKWLMKQLKQAAVSKIIIERPHKKCRVTIHSGRPGVVIGKKGADIDKLRKQVAKMTDSEVIINIVEIRKPELDAHLVAESISQQLERRVAFRRAMKRAVQSAMRLGAEGIRINCSGRLGGNEIARMEWYREGRVPLHTLRADVDYGVATAFTTYGTCGVKVWIFKGEILEHDPMAQDKRLAESEASGGGGRPRRDAA	1231
rpsC_lf.cluster1702	1	Ga0577643_00000168_1_708	Ga0577643_00000168	1	MGQKVHPESLRVGYIHDWKSNWFSEKNFSDYLDEDTRIREHITGKLAHAGLSDITIRKDANEVEVNIHTARPGIVIGKSGSEVDALRKDLHRMTRKQIKVNILEIKRPELDAKLVAQSIAEQLQNRVAFRRAMKRALTSAMRSGAKGVKVQVSGRLGGAEMARTEGYSDGRVPLHTLRADIDYGFYEARTTFGRIGVKCWINKGEIMPEGYSGQDLTELEAPALSTTPGGGDSSSV	40497
rpsC_lf.cluster1703	8	Ga0577622_0008115_3637_4347	Ga0577622_0008115	1	MGQKVNPIGFRLGVIRSWDSKWYEEKNYAKWLHEDIRLREYVKKKLGQAGISKVEIERAANKVKINVHTARPGIVIGKRGAGIESIKKELQAFTQNEVFLNIVEVRKAETDAQLVAENITTQLERRIAFRRAMKKAIQTAQKFGAKGIRVACSGRLGGAEMARYEWYREGRVPLHTLRADIDYGFAEAKTTYGKIGCKVWIFRGEILPDGAGAEKRSAQGRQAPARSSTATPSPVQ	6580
rpsC_lf.cluster1704	6	soilwarming_3_unheated_45-60_052018_S14_9629_1	soilwarming_3_unheated_45-60_052018_S14_9629	1	MGQKCNPIGLRLGVNRTWDSRWYANKKEYGKLLQEDIKIRYYLLDKLKQAGVSRIFIERPHKKCRVTIHSARPGVVIGKKGADIEKLKTDLGKFTDSEVHLNIVEIRKPEIDAKLVADNIGQQLERRVAFRRAMKRAVQSAMRLGAQGIRINCTGRLGGAEIARIEWYREGRVPLHTLRADIDYGVATAKTTYGTCGVKVWVFKGEIMEHDPMAQDKRLNEAAESASRGGRPQPAA	1518
rpsC_lf.cluster1705	3	Ga0480588_0073957_538_1248	Ga0480588_0073957	1	MGQKINPTGFRLSVNRNWASKWYASSKNFPGMLAEDIKVREYLKKKLSHAAVGRVVIERPAKNARITIFSARPGVVIGKKGEDIEGLRNTLQRLMGVPVHVNIEEIRKPELDAQLIADSITGQLEKRVMFRRAMKRAMQNAMRLGAQGIKITSAGRLNGAEIARTEWYREGRVPLHTLRAEIEYGFSEAKTTYGTIGVQVLVFKGETLGKGEQPAVPAPEPDKKPRRAGAKHAAAS	2178
rpsC_lf.cluster1706	4	Ga0577623_0000012_181678_182388	Ga0577623_0000012	1	MGQKVNPIGFRLGVIRSWDSKWYEEKNYAKWLHEDIRLRDYVKKKLGQAGISKVEIERAANKVKVNVHTARPGIVIGKRGAGIESIKKELQQFTQNEVFLNIVEVRKAEIDAQLVAENITTQLERRIAFRRAMKKAIQTAQKFGAKGIRVACSGRLGGAEMARYEWYREGRVPLHTLRADIDYGFAEAKTTYGKIGCKVWIFRGEVLPETAAAEKAARTAPRVAPRASASTPTPVQ	188738
rpsC_lf.cluster1707	10	soilwarming_3_heated_60-80_052018_S30_2787_9	soilwarming_3_heated_60-80_052018_S30_2787	1	MGQKIHPTGFRLSVQRNWTSRWYSNSKNFPAMLQEDIKVRDFLKKKLAHAAVSKVVIERPAKNAKITVYSARPGVVIGKKGEDIEHLRAELQKLMGVPVHVNIEEVRKPEIDAQLIADSIAQQLEKRIMFRRAMKRAIQNAMRLGAQGIKIMSAGRLNGIEIARTEWYREGRVPLHTLRADIDYGFSEAKTTYGVIGIKVWVFKGEVLGRGEQPVVAPAPEPERKARRGARNAAAS	6198
rpsC_lf.cluster1708	6	Ga0577619_00669351_378_1088	Ga0577619_00669351	1	MGQKVNPIGFRLGVIRSWDSKWYEEKNYAKWLHEDIHLREYVKKKLGQAGISKVEIERAANKVKVNVHTARPGIVIGKRGAGIESIKKDLQAFTENEVFLNIVEVRKAETDAQLVAENITTQLERRIAFRRAMKKAIQTAQKFGAKGIRVACSGRLGGAEMARYEWYREGRVPLHTLRADIDYGFAEAKTTYGKIGCKVWIFRGEVLPEGAGAEKRSAQGRQAPARSSTATPSPVQ	1686
rpsC_lf.cluster1709	8	Ga0577627_0673637_540_1250	Ga0577627_0673637	1	KRADEERAETQSRTEITEAILGQKVNPYGFRLGFNKTWHSRWFAGKTYAETLHRDLKLRADLKKRLSHAGVSEIDIERTANKMRINIYTSRPGIIIGRKGAEVDKLRDELQKLVNGEVYINIQEIQRPELDAQLVSENIATQLERRIAFRRAMKKAMESAFRFGAKGIKVRVAGRLNGAEIARSEWYQDGRLPLHTLKADIDYGQATSHTTYGTIGVKVWIYKGEMAKTRSRRRPT	1251
rpsC_lf.cluster171	1	Ga0480588_0014895_2428_3453	Ga0480588_0014895	1	MGQKIHPGGFRIGIIHDWKSNWFSEKEFGAYLIEDVRIRDHIRGKLSHAGLSDIHIRKDSQRITIDIYTARPGIVIGKSGSEVEALRQDVHAMTHKAVHVNINEIKRPELDANLVAQSVAEQLQNRVSFRRAMKRSLASAMRSGAQGVRIRCGGRLGGAEMSRTEQYSEGRVPLHTLRADIDYGFAEAQTQAGRIGVKVWINKGEIMPAGYEGAQQQTTRLGEVDARRRRGVTTITEDTGPSRPERGRRPGGGGGAGGGGGRPGGGGGGGGRPGGGPGGGRPGGGGRPGGGPGGRGQQTGPSGPSTPVGRRAPDRSAKPAPEAPPAAAPPVDTPAPTEGDA	4801
rpsC_lf.cluster1710	1	Ga0577625_0428822_658_1368	Ga0577625_0428822	1	MGQKINPIGLRLGINRTWDSRWYAGKAEYGSLLQEDIKIRAELMKLLKQAAVSKIVIERPHKKCRVTIHSARPGVVIGKKGSDIEKLRKAVAKMTDSDVVINIVEIRKPELDATLVAESIAQQLERRVAFRRAMKRAVQTSMRLGAQGIRINCSGRLGGAEIARLEWYREGRVPLHTLRADVDYGVATAFTTYGTCGVKVWIFKGEIMEHDSMAQDRKMQEAEAGRPPRRETTAGA	1374
rpsC_lf.cluster1711	6	Ga0480584_0072393_1160_1870	Ga0480584_0072393	1	MRRVYMSSFDLGDAMGQKVHPYGFRLGFTKPWKSRWFAERDYDKQLHEDVKLKAELKDKLKSAGVSSVEIERPGNKLRIIIKTARPGIIIGRKGAEIDKLKAELQKKTAGKDIFVDIQEVHKPELDAQLVSESIALQLEKRVGFRRAMRKAVDSALRFGCKGIKVRVSGRLNGNEIARSEWYLQGRLPLHTLRADIDYGFTEARTTYGVIGVKCWVYKGEILPQKKREAATAAGGF	1992
rpsC_lf.cluster1712	4	Ga0506675_0256769_247_957	Ga0506675_0256769	1	MGQKIHPIGFRLSVQRNWTSRWYSNSKNFPGMLHEDIKVRDFLKKKLAHAAVSKVIIERPAKNAKITIYSARPGVVIGKKGEDIENLRGQLQKLMGVPVHVNIEEVRKPEVDAQLISDSIAQQLEKRIMFRRAMKRAIQNAMRLGAQGIKIMSAGRLNGIEIARTEWYREGRVPLHTLRADIDYGFSEAKTTYGVIGIKVWVFKGEMLGRGEQPVAAPAPEPERKARRGAKNAATS	1278
rpsC_lf.cluster1713	3	Ga0577635_0511642_26_736	Ga0577635_0511642	1	MGQKIHPIGFRLSVQRNWTSRWYSNSKNFPAMLHEDIKVRDFLKKKLAHAAVSKIIIERPAKNAKITVYSARPGVVIGKKGEDIENLRGQLQKLMGVPVHVNIEEVRKPEVDAQLISDSIAQQLEKRIMFRRAMKRAIQNAMRLGAQGIKIMSAGRLNGIEIARTEWYREGRVPLHTLRADIDYGFSEAKTTYGVIGIKVWVFKGEVLGRGEQPVAAPAPEPERKARRGAKNAATS	1082
rpsC_lf.cluster1714	1	Ga0577625_0254568_50_760	Ga0577625_0254568	1	MGQKVNPIGLRLGINRTWDSRWFARKGEYGQLLHEDMRIREALLKDLKQAAVSKIVIERPHKKCRVTIHSARPGIVIGKKGADIEKLRKKVGSMTSSEVHINIVEVRKPEVDAQLVSDSIAQQLERRVAFRRAMKRAVQSAMRLGAEGIRITCSGRLGGAEIARTEWYREGRVPLHTLRADIDYGVSTAHTAMGTCGVKVWIFKGEIMEHDPMAQDKRLSEGEHSQGRTRREPAAS	1814
rpsC_lf.cluster1715	2	soilwarming_3_heated_60-80_052018_S30_6073_1	soilwarming_3_heated_60-80_052018_S30_6073	1	MGQKINPIGFRLAVNRNWSSKWYANSRNFAPMLAEDIKVRDFLKKKLAHASVGRVLIERPAKDARITIFSARPGVVIGKKGEEIEALKAELRRIMGVQQVHVNIEEIRKPEIDAQLIADSIAQQLEKRIMFRRAMKRAMQNAMRLGAQGIKIMSSGRLNGIEIARTEWYREGRVPLHTLRADIDYGLGEAKTNYGVIGIKVWVYKGEILPKAEAAAAALLGTIAAPLPQQPEAPSE	4229
rpsC_lf.cluster1716	6	Ga0577619_00056711_700_1407	Ga0577619_00056711	1	MGQKVRPTGFRVGIMTDWLSVWYANKQDFPELLLEDRKIRGFVKKRYGGSGISRIRIERTREKVTVFIYSARVGMIIGKKGQEIDKLTKELETLCHRHIEVKTMEVNRPERDPQLVAEDIAEQLQKRASFRRTMKRAMDTTMEAGAKGIRIQMAGRLGGSEMARNEKSMAGSIPLSTLRAKIEYGFAEAKTAQGHIGIKVWINNGDYLNPEKDADAGQSGSQRFRRPGGRQAKRG	5798
rpsC_lf.cluster1717	7	Ga0480586_0209747_250_957	Ga0480586_0209747	1	VGQKVHPYGFRLGFNKTWKSRWFADRDYAKLLHEDLALRADLKKRFMHAGVAKIETERAANKLKIDIHTSRPGIIIGRKGTEVEKLKAEIQKRTNREVFINIQEIQKPELDAQLIAESVAQQLEKRVAFRRAMRKAVESALRFGARGIKVRVSGRLNGAEIARSEWYLHGQLPLQTLRADIDYGFAEASTTYGQIGVKTWLYKGERLTPKTAREEEFRERPPRRPTGGGGRDARQ	1045
rpsC_lf.cluster1718	12	Ga0577639_0067325_979_1686	Ga0577639_0067325	1	MGQKVNPIGLRLGINRTWDSRWFARKEYGNLLLDDLGLRKFLQRRLTQAGLSRVVIERAARRTRITLHSARPGVVIGKKGVDIEKLRTDLAKVTNSEVSLNIVEIRKPEIDAKLIADGIAQQLERRVAFRRAMKRAVQSAMRLGAQGIRINCSGRLGGAEIARMEWYREGRVPLHTLRADVDFGYGTAKTTYGVCGVKVWVFKGEILAHDPMAQDKRLNEGQPASHERGRREALG	3020
rpsC_lf.cluster1719	1	Ga0577627_0458139_856_1563	Ga0577627_0458139	1	TKNPKVQLNIQEIKQHELDAALIAQGIADQLQGRVSFRRAMKRAVQTVQKAGAQGIRVQCAGRLGGSEMSRREFYREGRVPLHTLRADIDYGFREARTTFGRIGVKVWIYKGDILPYKTSSEDKISREAAMAVGETSGQSRPRRVISAGGGRRRPDLGEPGAATAATPETAAEPAIDEGAEGAEGAEGAEGAEAAEAQPIVGVDPELERLLAEEEEIERRTRGDHHETPHFPKDA	1563
rpsC_lf.cluster172	1	Ga0577615_0510160_188_1213	Ga0577615_0510160	1	VGQKIHPGGLRVGIIHDWKSNWYTSKKEFPQALIEDIRIREHIYKKLAHAGLSDILIRKDKQRLTIDIYTARPGIVIGKSGVEVDALRREIHAMTQKNVHININEIKRPELDAKLVAQSIAEQLENRVSFRRAMKRSIASAMRSGAHGVKVMCGGRLGGGEMSRSESYSEGRVPLHTIRADIDYGIAEAKTTFGRIGVKVWINKGEIMPEGYGGMVTDKDTRLGEQDQARRRRSGAAEGLSASRESSRQRGGDRTDLGPVRRRRPGGSRPRRGGEGRGQDNVERPRTDESAVSAEGREQPPIEPQVQESPAAVVDAPDTTTPKVMHEDPTKLDDSGSEGGS	1318
rpsC_lf.cluster1720	6	Ga0577625_0505583_11_718	Ga0577625_0505583	1	VGQKVHPYGFRLGFNKTWKSRWFADRDYVKLLHEDLALRADLKKRFMHAGVAKIETERAANKLKIDIHTSRPGIIIGRKGTEVEKLKAEIQKRTNREVFINIQEIQKPELDAQLIAESVAQQLEKRVAFRRAMRKAVESALRFGARGIKVRVSGRLNGAEIARSEWYLHGQLPLQTLRADIDYGFAEASTTYGQIGVKTWLYKGERLTPKTAREEEFRERAPRRPAGGGGRDARQ	1256
rpsC_lf.cluster1721	1	Ga0480452_0363108_25_732	Ga0480452_0363108	1	VIGRRGAEADRLRAGLLQITGNPKIHFNIQEIKQPELDATLIAQGVADQLAGRVSFRRAMKRAVQTAMKAGAQGIRVQCGGRLGGAEMSRKEWYREGRVPLHTLRADIDYGQAEARTTFGRIGVKVWIYKGDILPYKSAAEDKIAKEAAMAVGETAGQGSSGRRVISAGGGRRRPAEEAVPVEAAPDEEAPAEEAKPLVKEADPALEALLAEEEEIERRTRREHHEAPKFHGDEE	1053
rpsC_lf.cluster1722	3	Ga0577619_00017954_8116_8823	Ga0577619_00017954	1	MGQKVHPAGLRLGINRTWDSRWFARRDYSTLLHEDLRLRKFLIDRLVQAGVSRIVIERAAKKTRITIHSARPGVVIGKKGADIEKLRTDIAKMTKSEVSLNIVEIRKPEIDAKLIADGIAQQLERRVAFRRAMKRAVQSAMRLGAQGIRINCSGRLGGAEIARMEWYREGRVPLHTLRADVDFGYGRANTTYGTCGVKVWVFKGEILAHDPMAQDKRAAEAQPTGGDRRPRPDAA	9442
rpsC_lf.cluster1723	23	Ga0577619_00074953_1131_1838	Ga0577619_00074953	1	MGQKVNPIGLRLGINRTWDSRWFARKEYGNLLLDDLGLRKFLQRRLSQAGLSRVVIERAAKRTRITLHSARPGVVIGKKGVDIEKLRTDIAKVTNSEVSLNIVEIRKPEIDAKLIADGIAQQLERRVAFRRAMKRAVQSAMRLGAQGIRINCSGRLGGAEIARMEWYREGRVPLHTLRADVDFGYGTAKTTYGVCGVKVWVFKGEILAHDPMAQDKRLNEGQPASHERGRREALG	5131
rpsC_lf.cluster1724	17	Ga0577633_0814875_191_898	Ga0577633_0814875	1	MGQKVNPIGLRLGINRTWDSRWFARKEYGNLLLDDLGLRRFLHRRLSQAGVSRVVIERAARRTRITLHSARPGVVIGKKGADIEKLRGDIAKLTNSEVSLNIVEIRKPEIEAKLIADSIAQQLERRVAFRRAMKRAVQSAMRLGAQGIRINCSGRLGGAEIARMEWYREGRVPLHTLRADVDFGYGTAKTTYGVCGVKVWVFKGEILAHDPMAHEKRLTEGQPPGHERGRREALG	1031
rpsC_lf.cluster1725	11	Ga0577634_0579718_322_1029	Ga0577634_0579718	1	MGQKVNPIGLRLGINRTWDSRWFARKEYGNLLLDDLGLRRFLQQRLSQAGVSRIVIERAAKRTRITLHSARPGVVIGKKGADIEKLRTDIAKLTKSEVSLNIVEIRKPEVEAKLIADSIAQQLERRVAFRRAMKRAVQSAMRLGAQGIRINCSGRLGGAEIARMEWYREGRVPLHTLRADVDFGYGTAKTTYGVCGVKVWVFKGEILAHDPMAQEKRMTEGQPAGHERGRREAVG	1386
rpsC_lf.cluster1726	1	Ga0577639_0102887_1247_1954	Ga0577639_0102887	1	MTHTVHPYAHRLGIIRDWKSRWFAGDKKSYRENLAVDAAIRTFLQKRLRGMHATDTEIERSQSEIRVIVHTARPGLVIGRSGENATKLRTELTRLVKKAAPTNTRAVKLDIMEIRQPETSAAVVAFMVAEGLEKRMPFRRVLKGTVEKVMAVREVVGVRIVISGRLGGGDMARTEQIKRGRIPLQTFRANIDYAMERAYLPYGVIGIKVWIYLGETFNERERAGAVRDMRGPASK	2515
rpsC_lf.cluster1727	1	Ga0577640_0182507_768_1475	Ga0577640_0182507	1	MGQKVNPIGLRLGINRTWDSRWFARKEYGNLLLDDLGLRSFLHRRLSQAGVSRVVIERAARRTRITLHSARPGVVIGKKGADIEKLRGDIAKLTKSEVSLNIVEIRKPEIEAKLIADSIAQQLERRVAFRRAMKRAVQSAMRLGAQGIRINCSGRLGGAEIARMEWYREGRVPLHTLRADVDFGYGTAKTTYGVCGVKVRVFKGEILAHDPMAHEKRLTEGQPPGHERGRREALG	1681
rpsC_lf.cluster1728	1	Ga0577640_0409673_398_1102	Ga0577640_0409673	1	MGQKVHPEALRVGYIHDWKSNWFNEKNFSDYLFEDVQIRAHIIGRLSHAGLSDITIRKNATEVEVNIHTARPGIVIGKSGSEVDQLRRDLHRITSKQVKVNILEIKRPELDARLVAQSIAEQLQNRVAFRRAMKRALTSAMRSGAKGVKVQVSGRLGGAEMARTEGYSDGRVPLHTLRADIDYGFHEARTTFGRIGVKCWINKGEIMPEGYTGADLTIMDEPPPQAPDRGARDGR	1104
rpsC_lf.cluster1729	3	Ga0577619_00050269_1791_2498	Ga0577619_00050269	1	MGQKVNPIGLRLGINRTWDSRWFARKEYGNLLLDDLGLRRFLGRRLSQAGLSRVVIERAAKRTRITLHSARPGVVIGKKGADIEKLRTDIAKVTNSEVSLNIVEIRKPEIDAKLIADGIAQQLERRVAFRRAMKRAVQSAMRLGAQGIRINCSGRLGGAEIARMEWYREGRVPLHTLRADVDFGYGTAKTTYGVCGVKVWVFKGEILAHDPMAQDKRLNEGQPASHERGRREALG	6117
rpsC_lf.cluster173	1	Ga0577627_0014769_6625_7650	Ga0577627_0014769	1	MGQKIHPGGFRIGIIHDWKSNWFSEKEFGAYLIEDVRIREHIRGKLSHAGLSDIHIRKDSQRITIDIYTARPGIVIGKSGTEVEALRQDVHAMTHKAVHVNINEIKRPELDANLVAQSVAEQLQNRVSFRRAMKRSLASAMRSGAQGVRIRCGGRLGGAEMSRTEQYSEGRVPLHTLRADIDYGFAEAQTQAGRIGVKVWINKGEIMPAGYEGAQQQTTRLGEVDARRRRGVTTITEDTGPSRPERRRGPGGGGGPGGGGGGGGGGGGRPGGGGGGRPGGGAGGGRGGRAGGQQTGPSGPSTPQGRRAPVRPAPAAEAPPVAPPVEAPAPEAPVAPQEGEG	7731
rpsC_lf.cluster1730	4	Ga0577635_0014295_1305_2012	Ga0577635_0014295	1	MGQKVNPIGLRLGINRTWDSRWFSRKEYGNQLLDDLKLRKFLGGRLTQAAISKVLIERAAKKTRITLHSARPGVVIGKKGADIDKLRGDIAKVTNSEVSLNIIEIRKPEIEAKLIAEGIAQQLERRVAFRRAMKRAVQSAMRFGAQGIRINCSGRLGGAEIARMEWYREGRVPLHTLRADVDYGQATAKTTYGTCGVKVWVFKGEILAHDPMAQDKRVAEGQPPERGGRRERDRE	5422
rpsC_lf.cluster1731	2	Ga0577631_0032519_2722_3429	Ga0577631_0032519	1	MGQKVNPIGLRLGINRTWDSRWFAAKGQYGRLLHEDIKIRGWLMKQLKQAAVSKIVIERPHKKCRVTIHSARPGVVIGKKGADIDKLRKQVAKMTDSEVIINIVEIRKPELDAHLVAESISQQLERRVAFRRAMKRAVQSAMRLGAEGIRINCSGRLGGNEIARMEWYREGRVPLHTLRADVDYGVSTAFTTYGTCGVKVWIFKGEILEHDPMAQDKRLAESESGGGGRPRRDAA	3677
rpsC_lf.cluster1732	1	Ga0480455_00506193_1_708	Ga0480455_00506193	1	AENVASQLEKRIAFRRALKQTLMRSMRAGAKGARIQVSGRLGGAEMSRREWDRDGRVPLHTLRANIDYGQAEARTTFGRIGVQCWLYLGDFVSATGEPLPASGRERPEEAEPAEAVERTVVIPAAAAPVETAAPETVTAAPAEADGETPVAEAFPEITEEPAEEEEEELVEGDEEIAAVVTHVPASDAKVEKLTPKRAAARRKPTTARKPAAPSRAPKKPAKKPAAAEPEPEDEE	1737
rpsC_lf.cluster1733	41	soilwarming_1_unheated_50-60_052016_S32_216_10	soilwarming_1_unheated_50-60_052016_S32_216	1	MGQKVHPAGLRLGINRTWDSRWFARRDYSTLLHEDLRLRKFLIERLAQAGVSRIVIERAAKKTRITIHSARPGVVIGKKGADIEKLRTDIAKMTKSEVSLNIVEIRKPEIDAKLIADGIAQQLERRVAFRRAMKRAVQSAMRLGAGGIRINCSGRLGGAEIARMEWYREGRVPLHTLRADVDFGYGRANTTYGTCGVKVWVFKGEILAHDPMAQDKRAAEAQPTGGDRGRRPDAA	7608
rpsC_lf.cluster1734	2	soilwarming_heated_30-45_052018_S18S23S28_5132_6	soilwarming_heated_30-45_052018_S18S23S28_5132	1	MGQKVNPIGIRLGITRDWTSRWYAGKRQFPLQVHTDFRVREFLKERLAEASVSRILIERAAKKVNITIQTARPGIVIGKKGEDIEKLRQETAALLGMPVNDVRLNIAEIRKPELDSQLVADSIAQQIEKRVMFRRAMKRAVMSTMRSGALGVKVRVSGRLNGSEIARTEWYREGRIPLHTFRADIDYGLSEANTTYGVIGVKVWIFKGEVFDKSELAQQASEAEAAPAPSTPLAA	2850
rpsC_lf.cluster1735	1	Ga0577626_0049239_2574_3281	Ga0577626_0049239	1	MGQKVHPAGLRLGINRTWDSRWFSRRDYSSLLHEDLKLRKFLIERLAQAGVSRIVIERAAKKTRITIHSARPGVVIGKKGADIEKLRADIAKMTKSEVSLNIVEIRKPEIDAKLIADGIAQQLERRVAFRRAMKRAVQSAMRLGAQGIRINCSGRLGGAEIARMEWYREGRVPLHTLRADIDFGYGRANTTYGTCGVKVWVFKGEILAHDPMAQDKRAAEAQPTGGDRGRRPDAA	5192
rpsC_lf.cluster1736	2	Ga0577639_0339023_668_1375	Ga0577639_0339023	1	LNEFFQRELAEEGYSGVEVRVTPTVTDIIIRATHTQEVLGEQGRRIRELTSLIQKRFKFPENSVSLYAAKVQNRGLSAVAQCESLRYKLLNGLAVRRACYGVLRFIMESGAKGCEVVVSGKLRAARAKSMKFTDGFMIHSGQPAKDFIDFATRHVLLRQGVLGIKVKIMRGSDPEGKSGPQKSLPDSVTIIEPKEEQSVVQPMSQDYGAKAAAAQAAAEAQRTAEQQEEQAGEEQ	1448
rpsC_lf.cluster1737	1	Ga0480478_035561_716_1423	Ga0480478_035561	1	LLQKGMERAGISKVEIERTTDRVRVDIHTARPGIVIGRRGAEADRIRGDLEKLTAKQIQLNILEVKNPEVDAQLVAQGVAEQLSSRVSFRRAMRKAMQSSMKGGAKGIRVQCSGRLGGAEMSRSEFYREGRVPLHTLRADIDYGFYEARTTFGRIGVKVWIYKGDAAPTRAGREAQQAALRAAGAGQRRDRDGGRPAAGGPRRPRRDGGRPDNRSDRPERTAPAAEPSAESSGEG	1437
rpsC_lf.cluster1738	2	Ga0577627_0681019_460_1167	Ga0577627_0681019	1	VGQKVHPYGFRLGFNKTWKSRWFADRDYAKLLHEDLALRADLKKRFAHAGVSKIETERAANKLKIDIHTSRPGIIIGRKGTEVEKLKAEIQKRTNRDVFINIQEIQKPELDAQLIAESVAQQLEKRVAFRRAMRKAVESALRFGARGIKVRVSGRLNGAEIARSEWYLHGQLPLQTLRADIDYGFAEASTTYGQIGVKTWLYKGERLTPKTAREEEFRERAPRRPAGGGGRDARQ	1243
rpsC_lf.cluster1739	1	Ga0577632_0016412_8_712	Ga0577632_0016412	1	MGQKVNPIGLRLGINRTWDSRWFAGKGEYGRLLHEDIKIRSFLMTQLKQAAVAKIIIERPHKKCRVTIHSARPGVVIGKKGADIDKLRKQVAKMTSSEVIINIVEIRKPEVDAKLVAESIAQQLERRVAFRRAMKRAVQSAMRLGAEGIRINCGGRLGGNEIARMEWYREGRVPLHTLRADVDYGTATAFTTYGTCGVKVWIFKGEILEHDPMAQDKRLAEGESGGRHRPRDAA	6912
rpsC_lf.cluster174	3	Ga0577632_0037292_1216_2241	Ga0577632_0037292	1	LGHKVHPNAFRLGVYRTWEANWFALDKDYTKLLHEDLAMRGLIMGRLRNAGIARIETERSSNAQMTVTIHTAKPGIVIGKGGASVDKLREDLEKQFGNRVRISIQEIKQPELDAQLVAENIASQLERRISHRRAMKQSILRTMRSGAKGVRIAMAGRLRGAEMARREWDREGRVPLHTLRADIQFGRATAKTTFGMIGIKVWIYRDMVKGRTRGGEQQAEIAPQPTEAEVANAQQAAQQGGPSGPGGRPGGQRPRRRGGRGRTGGGGGGQGGQGQGGGGGQGQSGQGGGGGQGQGGQGGGGGGQGQGGQGGGGQSQGQGGQGQGGGQARGGGSREGGSAPA	4727
rpsC_lf.cluster1740	1	Ga0577622_0342832_1_705	Ga0577622_0342832	1	VEIERTRDRVRVDIHTARPGIVIGRRGTEADRIRADLEKLTGKQVQLNILEVKNPESQAQLVAQGVAEQLSNRVAFRRAMRKAIQSAMRQPNVKGIRVQCSGRLGGAEMSRSEFYREGRVPLHTLRADIDYGLYEAKTTFGRIGVKVWIYKGDIVGGKRELTAAAPSGAERPRRERPTGTRPRRSGASGTTATGTDVSRAVEEAPAAESPTTEAPAAEPAPAEAPVAETESTES	1231
rpsC_lf.cluster1741	7	Ga0480480_032271_185_889	Ga0480480_032271	1	MIRMGQKINPISFRTGIMIGWKSRWYASKKEYSSLLMEDHKIRKYVTEKYKFAGIPKIEIERTRDEVKVILHAARPGVIIGRKGQQVDQLQDELQNLVGRRINIKIEEITRPELQAHLVAEEIAEQLSKRASFRRTMKRVLEQTMEAGAKGIKVQLAGRLGGSEMARREKAIAGSIPLSTLRAKIDYGFVEAKTAQGHIGVQVWINQGMYEDEADGADAQEGQAPKKPKRAYKR	1063
rpsC_lf.cluster1742	2	Ga0577638_0003379_14273_14977	Ga0577638_0003379	1	MGQKVRPTGFRTGIYTDWSSTWYASKADFSELLVEDFKIRKYVKKRYGGAQISKIRISRTREKVTVFIHAGRVGMIIGKKGTEVDKLTKELEDLTHRHIEVKTMEVHRPEVDPQLVAENIAEQLGKRASFRRTMKKAMDVTMEAGAKGIRVQMAGRLGGSEMARNEKNMQGSIPLSTLRAKVEYGFAEAKTAQGHIGVKVWINNGDYLTPEENSDAANAQASKVSKKPARRGPR	18845
rpsC_lf.cluster1743	44	soilwarming_1_unheated_50-60_052016_S32_8062_2	soilwarming_1_unheated_50-60_052016_S32_8062	1	MGQKVNPIGLRLGINRTWDSRWYAGKGEYGQLLHEDIAIRKELHEQLKQAAVSRIVIERPHKKCRVTIQSARPGVVIGKKGADIEKLRKKVAALTDSDVVINIVEIRKPELDAQLVAESIAQQLERRVAFRRAMKRAVQSAMRLGAEGIRINCSGRLGGAEIARMEWYREGRVPLHTLRADVDYGVATAFTTYGTCGVKVWIFKGEILEHDPMAQDKKLAEADAGRPRRDAAGG	2300
rpsC_lf.cluster1744	1	Ga0577641_0390844_13_717	Ga0577641_0390844	1	MERAGISKVEIERTRDRVRVDIHTARPGIVIGRRGAEADRIRGALEKLTKKQVQLNILEVKNPESDAQLVAQGVAEQLSNRVAFRRAMRSPQVKGIRVQCGGRLGGAEMSRSEHYHDGRVPLHTLRADIDYGFFEAKTTFGRIGVKVWIYKGEIVGGLKAKEARDAAAAAERAPRRDRGDRPARPRRSGASGTTATSTDAGRAAAAAQEGAQPAEVATNPTPDASTGTAEKTEG	1413
rpsC_lf.cluster1745	8	Ga0577617_0173841_780_1484	Ga0577617_0173841	1	MGQKVHPTGFRVGIMEDWRSRWYASKHEFKDLLVEDFKIRKFIKGKYSYAGIPKVEIERTRDAVKVILFTARPGIIIGRKGAEVERLQEELQALTGRRIDIKIEEVTRPEIDAQLISEDIAEQLQKRSSFRRTMKRALEQTMDGGAKGVRIQLSGRLGGSEMSRTESGNLGSIPLSTLRARIDYGFHEAKTAQGHIGIKVWVNQGDYLKTEGGTDGHDAQAGQVPKKPKRPRKR	2239
rpsC_lf.cluster1746	1	Ga0480455_00592603_164_868	Ga0480455_00592603	1	MGQKVRPTGFRTGIMCDWRSRWYANKQDFADLLVEDQKIRAFIKRRYARSGISKIEIERTREKVVVYIYSARVGMIIGKKGQEVDRLTKDMENLTHRHVEVKTMEVNRPEVDAQLVAEEIAEQLEKRASFRRTMKRAMDTTMENGARGVKVQMSGRLGGAEMARQEKQMLGSIPLSTLRARIEYGFTEAKTAQGHIGIKVWINNGEYQTSEEDDHAAHAQTGKVPKKPTRQGKR	1599
rpsC_lf.cluster1747	12	Ga0577641_0047053_274_978	Ga0577641_0047053	1	MGQKVNPIGFRLGVNRDWRSRWYASPQELPAFLHSDLEIRAYVKKKLQFAAVSKIVIERAWNSIRVTIHTARPGIVIGRKGAEIEKMTEEISKMAQGKQIKIDIQEIKTPELDAQLVAENVSLQIERRIAYRRAMKKAVQVAMDFGAEGIRLRCSGRLNGAEISRSEWYREGKVPLHTLRTPIDYGFAEANTVYGKIGVKCWMCKKEEAPSEAPVAMAPPPPPPPPPPAEPVEA	3840
rpsC_lf.cluster1748	1	Ga0577630_0299036_230_934	Ga0577630_0299036	1	MGQKVNPIGIRLGITRDWASKWYASTRNFPSYVHTDHMVRELLRKKLAEASVSRIHIERAARKVNITIHTARPGIVIGKKGEDIEKLRGQVAKMVKMAVNDVRINISEIRKPELDALLVAESIAQQLERRVMFRRAMKRAVTNTMRIGALGIKVRVSGRLNGAEIARTEVYREGRVPLHTFRADIDYGLAEAKTTYGVIGVKVWVFKGEVFKQGEQPPTAADSDAQQQPAEATA	1400
rpsC_lf.cluster1749	13	Ga0577619_00720226_76_780	Ga0577619_00720226	1	MGQKVRPTGFRTGIMIDWQSQWYANKQDFAELLVEDYKIRAYIKRRYGRSGISRIRIERTREKVVVFIYSARVGMIIGKKGQEVDKLTHELESLAHRHIEVKTMEINRPEVDPQLVAEDIAEQLEKRASFRRTMKRAIDQTMEGGAKGIRIQLSGRLGGSEMARQETNMAGSLPLSTLRAKIEFGFTEAKTAQGNIGIKVWINNGDYLSSEESGDAANAQTSKVSKKPARQGKR	1616
rpsC_lf.cluster175	4	Ga0577638_0147807_1099_2124	Ga0577638_0147807	1	MGQKIHPVGLRLGITRTWDSRWFEKKNYVAWLHEDVAIRKYFGRMTRAAAISRVEIERRANQARVIINTGKPGIIIGKRGVGIDEIRRNLEKLTGKQVQVNVVEIKTIELDARLVGQNIVDQLEKRIAFRRAMKQAIMRTMKAGARGVKVQVSGRLGGAEIARTERNHDGKVPLHTLRADIDYAHVEAFTTFGRIGVKVWIYKGEVLPDQPRGEREVQGRPGAAGDAARFRDNRRGTRGGRGRGEGRPPGAPRGDEAPAIDTADAMRAAQTEGPSLESVIEGGAAVEHHQTAPHSGAVTHEPSAEHGHGVTTETSVVPPETQATHDDAERPGAPSVENEGQ	3506
rpsC_lf.cluster1750	1	Ga0577621_0466143_2_703	Ga0577621_0466143	1	MGQKVNPYGFRLGVTTDWKSRWFADRKEYREYVIEDWQIRNYLMTELPHAAISRVEVERTRDRLRVDVHTARPGIVIGRRGSEADRLRAGLAKITSNNKVQLNIQEIKQPELDAALIAQGVADQLAGRVAFRRAMKRAVQNAQKAGAQGIRVQCSGRLGGAEMSRTEWYREGRVPLHTLRADIDYGFREARTTFGRIGVKVWIYKGDILPYKTSAEDKISREAAMAVGETSGQA	1017
rpsC_lf.cluster1751	3	Ga0577638_0925922_3_704	Ga0577638_0925922	1	VGQKVHPYGFRLGYNKDWHSHWFAKKQFGDFLIEDLKLKAELKRRFTGAGVSHVDVERAANRLKIIIYTSRPGIIIGRKGSEIDKLKGDISSRTGREVLVSIQEIHKPELNAQLQAEKIGAQLEKRIAFRRAMRKAVEESLRFGAQGIKVKVSGRLNGAEIARSEWHLQGQLPLHTLRSDVDYGFAEAHTTFGVIGVKVWIYRGVILDANAAMARGTGTDPINDTRPGQREGRP	1248
rpsC_lf.cluster1752	4	Ga0480590_0156739_124_828	Ga0480590_0156739	1	MGQKVHPTGFRVGIMEDWRSRWYASKHEFKDLLVEDFKIRKFIKGKYSYAGIPKIEIERTRDAVTVFLSTARPGIIIGRKGAEVDKLKEELQTLTGRRIEVKIVEVNRPEIDAQLISEDIAEQLQKRSSFRRTMKRSLEQTMDGGAKGVKIQLSGRLGGSEMSRTESANLGSIPLSTLRARIDYGFSEARTAQGHIGIKVWVNQGDYLKAEGGTDGHDAQAGQVPKKPKRPRKR	1057
rpsC_lf.cluster1753	2	soilwarming_3_heated_60-80_052018_S30_1845_2	soilwarming_3_heated_60-80_052018_S30_1845	1	MGQKVNPIAFRTGITIGWRSRWYATKKNFGAWLVEDKKIRTFVKKEYGFAGISRIEIERIGEKMRIILSAARPGLLIGKKGSKVDKIIEDLGLLAGRAVEVKVEEIVTPELDSQIVGEAIAEQLNKRAPYRRTMRRYAEMIMDLGAKGVKLQIKGRLGGAEIARCEHIHLGRLPLNTLRGDVDFAISTAITTKGTIGIKVWIYKGERFGASPSNKGEEPGSRPHGLAPIAAEKA	7555
rpsC_lf.cluster1754	1	Ga0577627_0396315_125_829	Ga0577627_0396315	1	MGQKVNPTGFRVGIMEDWRSRWYATKQEFPELLVEDFKIRKFIKKKYSSAGIPKVEIERTRDSVKVILFTARPGIIIGKRGAEVERLQEELQTLTGRRIDIKIEEVTRPEIDAQLISEDIAEQLQKRSSFRRTMKRALEQTMDGGARGVKIQLSGRLGGSEMSRTEQGNLGSIPLSTLRAKIDYGFSEAKTAQGHIGIKVWVNQGDYLKTEGGPDAHDAQAGQVPKKPKRPRKR	1694
rpsC_lf.cluster1755	1	Ga0480584_0250439_335_1036	Ga0480584_0250439	1	MGQKVHPYGFRLGVTKTWRSRWFAKQDYAKLLREDIELKAALRERLKAAGVSAIEVDRPGNKLRITIFTSRPGIIIGRKGAEIEKLKGDLAKKTKREVFIDIQEVHKPELDAQLVSESIGLQLEKRVAFRRAMRKAVDSALRFGCKGIKVRVSGRLNGAEIARTEWYLQGQLPLHTLRADIDYGFSEAHTTYGVIGIKCWVYRGEILPGGLRRGLGREPEPRRAPPRDRGDRDR	1036
rpsC_lf.cluster1756	8	Ga0577619_00023459_6967_7671	Ga0577619_00023459	1	MGQKVRPTGFRTGIMLDWQSSWYASKQDFAELLVEDQRIRAFIQRRYGRSGISRIKIERTREKVVVFIYSARVGMIIGKKGQEVDKLTQDLEGLTHRHIEVKTMEINRPEVDPKLVSEDIAEQLEKRASFRRTMKRSIDQTMEAGAKGIRVQLSGRLGGSEMARQETNMAGNLPLSTLRAKIEYGFSEAKTAQGSIGIKVWINNGDYLDSEETGDAAHAQAGKVSKKPTRQGKR	8465
rpsC_lf.cluster1757	1	Ga0577630_0162201_619_1323	Ga0577630_0162201	1	MGQKVNPIGLRLGINRTWDSRWYAGKNDYGTLLHEDMKIRKELMKQLKQAAVSKIVIERPHKKARVTIHSARPGVVIGKKGADIEKLRRLVAKMTDSDVVINIIEIRKPELDAQLVAESIAQQLERRVAFRRAMKRAVQTSMRLGAEGIRINCSGRLGGAEIARTEWYREGRVPLHTLRADVDYGVATAFTTYGTCGVKVWIFKGEIMEHDSMAQDKKLQESDAGRPRREMPAG	1896
rpsC_lf.cluster1758	1	Ga0577627_0590840_239_943	Ga0577627_0590840	1	MNGSPEDFRMGQKSHPRGLRLGIIESWDSRWYASHDYAKLLHEDLKLRDFIKKRLYHAGISRIEIERMANKAKINIHTARPGIVIGKKGAEIDKLKGDIQKLMKGRDSFINIHEVRRPDLDPQLVAENIALQLERRVAFRRAMKEAVTRAMRMGAQGVKVHVAGRLGGAEIARQEWYREGRVPLQTLRADVAYGFAEARTTYGVIGVKVWIFRGEVLTRREADAKRSGAPAQAQ	1351
rpsC_lf.cluster1759	4	Ga0577624_0171478_398_1102	Ga0577624_0171478	1	MGQKVRPTGFRTGIMLDWQSQWYASKQDFAELLVEDQRIRAFIQRRYGRSGISRIRIERTREKVVVYIYSARVGMIIGKKGQEVDKLTHDLEKLAHRHIEVKTMEINRPEVDPKLVSEDIAEQLEKRASFRRTMKRAIDQTMEAGAKGIRVQLSGRLGGSEMARQETNMAGNLPLSTLRAKIEYGFSEAKTAQGHIGIKVWINNGDYLISEEAGDAAHAQAGKVSKKPTRQGKR	2281
rpsC_lf.cluster176	9	Ga0577627_0164279_1_1020	Ga0577627_0164279	1	MGQKVHPNAFRLGIYKPWQARWYADKDYTEMLLEDMKMRRLILNRLRNAGISKVETERSANQATVVIWTAKPGIVIGKGGASVDQLRDDLEKMTGKKVRVTIQEIKHPELDAMLVAQNVAAQLERRIAFRRAVKQSVLRTMRAGAKGVKIMVSGRLGGAEMSRREWDRDGRVPLHTLMANIDFGQTEARTTFGRIGVSVWVYLGDFDLTTHEETFDEIPARQLLDEPRPLAATPTNGQAAAAAATLAAAVAAAAVPAEESPAAVAPEPAPEAPKPKRAPRATVAKADKEKGDTEPADGEVAEAKPVKASARKSGAEAQAATADASAKPAAAKPKAAPKTP	2691
rpsC_lf.cluster1760	7	Ga0577619_00574288_778_1482	Ga0577619_00574288	1	MGQKVRPTGFRTGIMIDWQSQWYANKQDFAELLVEDQKIRAYIKRRYGRSGISRIRIERTREKVVVYIFSARVGMIIGKKGQEVDKLTHELEALAHRHIEVKTMEINRPEVDPQLVAEDIAEQLEKRASFRRTMKRAIDQTMEGGAKGIRIQLSGRLGGSEMARQETSMAGSLPLSTLRAKIEFGFTEAKTAQGNIGIKVWINNGDYLSSEESGDAANAQAGKVSKKPARQGKR	1840
rpsC_lf.cluster1761	1	Ga0577624_0016419_2133_2837	Ga0577624_0016419	1	MGQKVRPTGFRTGIMCDWQSRWYANKQDFADLLVEDQKIRAFIKRRYARSGISKIEIERTREKVVVYIYSARVGMIIGKKGQEVDRLTKDMENLTHRHVEVKTMEVNRPEVDAQLVAEEIAEQLEKRASFRRTMKRAMDTTMENGARGVKVQMSGRLGGAEMARQEKQMLGSIPLSTLRARIEYGFTEAKTAQGHIGIKVWINNGEYQTSEEDEHAAHAQAGKVPKKPTRQGKR	7332
rpsC_lf.cluster1762	4	Ga0577619_00291074_1237_1941	Ga0577619_00291074	1	MGQKVRPTGLRTGIMTDWLSTWYANKQDFGELLVEDQKIRRFVKKRYGGSGISRIRIERTREKVVIYIHSARVGMIIGKKGQEIDKLTKELEDLCHRHIEIKTIEVNRPEVDPQLVAEDIAEQLQKRASFRRTMKRAIDTTMEAGAKGIRIQMSGRLGGAEMARTEKNMAGSIPLSTLRARIEYGFAEAKTAQGHIGVKVWINNGDYLTEENINDLPSTQQGRGQRRPPRQPKR	2665
rpsC_lf.cluster1763	1	Ga0577619_00270436_1417_2121	Ga0577619_00270436	1	MGQKVRPTGFRTGIMLDWQSQWYASKQDFAELLVEDQRIRAFIKRRYGRSGISRIRIERTREKVVVYIYSARVGMIIGKKGQEVDKLTHDLEKLAHRHIEVKTMEINRPEVDPKLVSEDIAEQLEKRASFRRTMKRAIDQTMEAGAKGIRVQLSGRLGGSEMARQETNMAGNLPLSTLRAKIEYGFSEAKTAQGHIGIKVWINNGDYLTSEETGDAAHAQAGKVSKKPTRQGKR	2770
rpsC_lf.cluster1764	1	Ga0577619_01465721_102_806	Ga0577619_01465721	1	MGQKVRPTGFRTGIMMDWSSKWYASKADFSDLLVEDFKVRKFIRKKHPGGGIAKIRIERTREKVVVFIFSSRVGSIIGKKGEKIDKLTRELEHLTHRVIEIKTMEVNRPETEPQLVAQDIAEQLAKRVSFRRTMKQAIQKAMENGAKGIRLQLSGRLGGAEMARQESSMSGSIPLSTLRARIEYGFAEAHTAQGNIGIKVWINNGDYLDSEEGQHAAHAQAGKVSKKPARQGKR	1050
rpsC_lf.cluster1765	1	Ga0577628_0066036_54_758	Ga0577628_0066036	1	MGQKVRPTGFRTGIMIDWQSQWYANKQDFAELLVEDQKIRAYIKRRYGRSGISRIRIERTREKVVVYIYSARVGMIIGKKGQEVDKLTHELEALAHRHIEVKTMEINRPEVDPQLVAEDIAEQLEKRASFRRTMKRAIDQTMEGGAKGIRIQLSGRLGGSEMARQETNMAGSLPLSTLRAKIEFGFTEAKTAQGNIGIKVWINNGDYLSSEESGDAANAQTSKVSKKPARQGKR	2215
rpsC_lf.cluster1766	5	Ga0480586_0063250_81_785	Ga0480586_0063250	1	MGQKVNPIGLRLGINRTWDSRWYAGKNEYGTLLHEDMKIRKELMTSLKQAAVSKIVIERPHKKCRVTVHSARPGVVIGKKGADIEKLRKSVAKLTDSDVVINIVEIRKPELDATLVAESIAQQLERRVAFRRAMKRAVQSAVRLGAQGIRINCSGRLGGAEIARMEWYREGRVPLHTLRADVDYGVATAFTTYGTCGVKVWIFKGEIMEHDSMAQDKRLAEAEAGRPRRETTTA	1812
rpsC_lf.cluster1767	1	Ga0577618_0716210_3_707	Ga0577618_0716210	1	LIERPAKDARITIFSARPGVVIGKKGEEIEALKAELRRLMGVNQVHVNIEEIRKPEVDAQLIADSIAQQLEKRIMFRRAMKRAMQNAMRLGAQGIKIMSSGRLNGIEIARTEWYREGRVPLHTLRADIDYGLGEAKTSFGVIGIKVWVYKGEVMPKGEAQAALPSAAPAAQPETPAEPRRAKKPVPKPGARRPAGRPRSEGERKAAKKPDAPAPKTTVKRPKKVLKAEGGETKE	1157
rpsC_lf.cluster1768	1	Ga0577618_0853204_60_764	Ga0577618_0853204	1	MGQKVRPTGFRTGIMIDWQSTWYANKQDFSELLVEDFKIRKYIKKHYGGSGISKIKIQRTREKVTVFLHAARVGMIIGKKGQEIDKLTKELEDLCHRHIEIKTIEVTRPEVDPQLVAEDIAEQLQKRASFRRTMKRALDTTMEAGAKGIRIQMAGRLGGAEMARTEKNMAGSIPLSTIRARIEYGFAEAKTAQGHIGVKVWINNGDYLTEENINDLPAMQGGRGQRRSPRQPKR	1040
rpsC_lf.cluster1769	1	Ga0577625_0700445_87_791	Ga0577625_0700445	1	MGQKTHPTGFRVGIMEDWRSRWYASKHEFSDLLVEDFKIRKFIKGKYSYAGIPKIEIERTRDAVTVFLSTARPGIIIGRKGAEVDRLKDELQELTGRRIEVKIVEVTRPEIDAQLISEDIAEQLQKRSSFRRTMKRALEQTMDGGARGVKIQLSGRLGGSEMSRTESANLGSIPLSTLRAKIDYGFHEAKTAQGHIGIKVWVNQGDYLKTEGGTDGHDAQAGQVPKKPKRPRKR	1048
rpsC_lf.cluster177	7	Ga0577628_0020583_2322_3344	Ga0577628_0020583	1	LGHKVHPNAFRLGVFRPWEANWFANPKDYTKMLHEDLEMRRTILARLRNAGIAKIETERSSNAQLTVTIHTAKPGIVIGKGGSSVDQLREDLEKRFGNRVRISIQEIKQPELNAQLVAENIASQIERRISYKRAMKQAILRTMRAGAKGVRVYCGGRLRGAEMARREWDREGRVPLHTLRADIDFGRATAKTTFGAIGVKCWIYKDQISPQQRRLAIADGAPIGEAIAPQPELPELPVPPRTDLVEPVTPPLPAEVTAEVAAEVAAEVAAAPARRARTSRTMAAPKTAAAPAAEKPKAAPRAKAAAKPAAEKSAGPTRTSPRGTTGAAPVKKSTTTRKKS	3546
rpsC_lf.cluster1770	1	Ga0577632_0652721_287_991	Ga0577632_0652721	1	MKQSILRTMRAGAKGVRIAAGGRLRGSEMARREWDREGRVPLHTLRADIDFGRATARTTFGMIGVKCWIYKGLVPGRKRGGDLDSDVFPQPVDGATPAPAAAAPPAAAPVAPAPAPVEPAGVVAQAPAVAAAPVEAPPVAAEAAAPIEAPPVAAEAAAPVEAPPVAAEAAAHTEAPPVAAEAAAHTEAPPVAAEAAAPEASAAPAAEQAPKAPRKRTTKAKAEPAAKEDTDAPA	1013
rpsC_lf.cluster1771	23	Ga0577619_00060970_1006_1707	Ga0577619_00060970	1	LSVTKYFIKDVSRRLEIDELLQRDLKRAGYSRVELTKSPVGTRVVIYAAKPGMVIGRRGQSIKDLTKLLETKFGIENPQLSVATIEIPEQDPKVVASQVAQALQRGVHFRRAAYWAIQRVMESQALGVEIIIRGKLTTERSRFEKFRAGYLPRVGDPVLKSVKVAVADVQLKQGLFGIKVRILPPTVDFIDKPTMKTPPPSVATPPPAIQVPVVESAEVETQKEEPIGNTAQA	5619
rpsC_lf.cluster1772	1	Ga0577619_00758684_326_1027	Ga0577619_00758684	1	MGQKIRPTGFRVGIMEDWRSRWYASKHEFSDLLVEDFKIRKFIKNKYGFAGIPKIEIERTRDAVTVLLSTARPGVIIGRKGAEVEKLQEELQNLTGRRIEIKIVEVSRPEIDAQLISEDIAEQLQKRSSFRRTMKRAIEQTMDGGAKGVKIQLSGRLGGAEMSRTEAAAAGSVPLSTLRAKIDYGFAEAKTAQGHIGIKVWVNQGDYLKMEAADGADAQTGQVSKKPKRPRKR	1568
rpsC_lf.cluster1773	2	Ga0577627_0792828_359_1060	Ga0577627_0792828	1	MGQKIRPTGFRVGIMEDWRSRWYASKHEFADLLVEDFKIRKFIKNKYGFAGIPKIEIERTRDAVTVLLSTARPGVIIGRKGAEVEKLQEELQNLTGRRIEIKIVEVSRPEIDAQLISEDIAEQLQKRSSFRRTMKRALEQTMDGGAKGVKVQLSGRLGGAEMSRTEAAAAGSVPLSTLRAKIDYGFAEAKTAQGHIGIKVWVNQGDYLKMEAGDGSDAQAGQVPKKPKRPRKR	1136
rpsC_lf.cluster1774	4	Ga0577619_00071132_3804_4505	Ga0577619_00071132	1	MGQKVRPTGFRTGIMIDWQSQWYASKQDFAELLVEDQKIRNYIKRRYGRSGISRIRIERTREKVVVYIYSARVGMIIGKKGQEVEKLTQELESLAHRHVEVKTMEINRPEVDPQLVAEDIAEQLEKRASFRRTMKRSIDQTMEGGAKGIRVQLSGRLGGSEMARQETNMAGSLPLSTLRAKIEFGFTEAHTAQGHIGIKVWINNGDYLDEESDNAAHAQAGKVPKKPTRQAKR	5253
rpsC_lf.cluster1775	1	Ga0577633_0783398_215_916	Ga0577633_0783398	1	MGQKVNPTGIRLGIASDWNSKWFASKRAYAQNLLSDLRVREFLKKKVAQASVSRIEIKRPAKKAYITIHTARPGVVIGKKGEDIDALRKQLHKMMPGVEVDIGVEEIRKPELDAYLVAESIAQQLERRIMFRRAMKRAVQNTMRLGALGIKIRVSGRLNGSEIARSEQYREGRVPLHTLRADIDYGFAEASTTYGQIGVKVWIFKGEILDASDLHTTTKDALPGEKPAVAAAN	1057
rpsC_lf.cluster1776	2	Ga0480588_0000026_120323_121024	Ga0480588_0000026	1	VGQKVHPTGFRLGFNKTWRSRWFADKDYAKLLHEDLKLRDTLKTRFQHAGVSKIEIERAANKLKIDIYTSRPGIIIGRKGTEVDKLKQEIQKKTNREVFINIQEIQKPELDAQLIGESVAMQLEKRVAFRRAMRKAVESALRFGARGIKVRVSGRLNGAEIARSEWYLHGQLPLQTLRADIDYGFAEASTTYGQIGVKVWLYKGERLVPRIGREEDYRAPRRPGGPGGPGDRR	170020
rpsC_lf.cluster1777	2	Ga0577615_0783979_158_859	Ga0577615_0783979	1	MGQKTRPTGFRVGIVEPWRSRWYASKKEFGDLLVEDFKIRKFIKKKYLFAGIPKIEIERTRDQVIVHLHCARPGIIIGRKGQEVDRLKAELEDLTGRRMDLKIIEINNANRSSQLVAEDIAQQLEKRASFRRTIKRALDQVMEAGVYGVKVQLSGRLGGAEMSRCEKAARGSIPLSTLQAHIDYGFAQALTAQGMIGVKVWINLGTYAEEEATDGANAKAGQIPQKPKKTHKR	1026
rpsC_lf.cluster1778	3	Ga0577625_0000400_17316_18017	Ga0577625_0000400	1	VGQKVHPIGFRLGFNKTWRSRWYSDRDYAKLLHEDLNLRATLKKRFAHAGVSKIETERAANKLKIDIYTSRPGIIIGRKGTEVDKLKQEIQKRTNREVFINIQEIQKPELDAQLISESVAMQLEKRVAFRRAMRKSVESALRFGARGIKVRVSGRLNGGEIARSEWYLHGQLPLQTLRADIDYGFAEAKTTYGQIGIKVWLYKGERLVPLRGREEEYRERAPRRPSGPPQGRG	49490
rpsC_lf.cluster1779	1	Ga0577623_0017159_2779_3480	Ga0577623_0017159	1	VGQKVNPIGLRLGINRTWDSRWYAGKVEYGTLLHEDIKIRAELMKQLKQAAVSHIVIERPHKKCRVTIHSARPGVVIGKKGADIEKLRRVVAKLTDSDVVINIVEIRKPELDAQLVAESISQQLERRVAFRRAMKRAVQSAMRLGAEGIRINCSGRLGGAEIARMEWYREGRVPLHTLRADVDYGVATAFTTYGTCGVKVWIFKGEILEHDPMAQDKKLAEGDQGRPRRDSAA	6234
rpsC_lf.cluster178	4	Ga0577633_0104470_1765_2787	Ga0577633_0104470	1	MGHKVHPNGFRLGVYRNWESKWFASDKEFSALLLEDIKLRKMLFNRLKNAGVARIETERSSSALTITLHTAKPGIVIGKGGTSVDQLRDELEKLTGKRVRVTIQEIKKPELSAQLVAESVAAQLEKRIAFRRAVKQSLMKTMRSGAQGVKIRVKGRLGGSEMARIEWNREGRVPLHTLKADIDFGQTEAKTTFGRIGVSAWVYTGDFPTERPKKVVEEPTDGEVPVAAALAETPLTAQLLAVAPEPAPTPAPASEAQPEPVAAVPVAEAAAAAPARRRRPPATTEATATPAADDAAAKPKRATRVAKPATEEAAPKPKRATAKTTTETKPATRRTTKKKE	3311
rpsC_lf.cluster1780	1	Ga0480449_0135383_656_1357	Ga0480449_0135383	1	LSVTKYFIKDVSRRLEIDELLQKDLKRAGYSRVELTKSPVGTRVVIYAAKPGMVIGRRGQSIKDLTKLLETKFGIENPQLSVATIEIPEQDPKVVASQVAQALQRGVHFRRAAYWAIQRVMESQALGVEIIIRGKLTTERSRFEKFRAGYLPRVGDPVLKSVKVAVTDVQLKQGLFGIKVRILPPTVDFIDKPTMKTPPPSVAPTPPTVQAPTVESAVVETETEEPIGNTAQA	1943
rpsC_lf.cluster1781	3	Ga0577625_0089266_810_1511	Ga0577625_0089266	1	MGQKVNPIGLRLGINRTWDSRWYAGKNEYGTLLHEDIKIREVLMKALKQAAVSKIVIERPHKKCRVTVHSARPGVVIGKKGADIEKLRKQVADLTKSDVVINIIEIRKPELDATLVAESIAQQLERRVAFRRAMKRAVQSAMRLGALGIRINCSGRLGGSEIARMEWYREGRVPLHTLRADVDYGVATAFTTYGTCGVKVWIFKGEIMEHDSMAQDKRLAEAEAGRPPRRDGA	3115
rpsC_lf.cluster1782	1	Ga0577625_0604341_104_805	Ga0577625_0604341	1	MGQKVNPIGFRLGITRDWTSKWYASTKNFPAHVYADHLVREFLKKRLVEASVSRIQIERAARKANITIHTARPGIVIGKKGEDIEKLRGQVAKIMKMPVGDVRINISEIRKPELDAQLVADGIAQQLERRVMFRRAMKRAVTNTMRIGALGIKVRASGRLNGSEIARTELYREGRVPLHTLRAEIDYGLAEAKTTYGIIGVKVWIFKGEVFNKQDMPPETTEGQAAAPAEATA	1139
rpsC_lf.cluster1783	3	Ga0577630_0441746_261_962	Ga0577630_0441746	1	MGQKVHPYGFRLGVIKTWNSKWFEDKNYAKWLHEDMRIKRAVKEYLMNANIASVEVERAANKAKVIVFTARPGMVIGKGGKGIEILKIGNLKTAVKGETKFAGVQSFTDNEVFIDVQEIRKAETSAQLVAENVAMQLERRVAFRRAMKKALSTAMKFGAKGIRIRCSGRLGGSEMSRVETYREGRVPLHTLRADIEFGQHEARTKYGIIGVKCWVFKGEVLARRQRRPQIAGA	1146
rpsC_lf.cluster1784	1	Ga0577640_0120618_2_700	Ga0577640_0120618	1	MGQKIHPGGLRVGVIHDWKSNWYTGKKEFPQYILEDVRIREHIYKKLAHAGLSDILIRKDKQRITVDIYTARPGIVIGKSGVEVDALRRELHAMTQKNVHITINEIKRPELDAKLVAQSIAEQLSNRVAFRRAMKRALASAIRSGAAGVKIQCSGRLGGGEMSRSETYNEGRVPLHTIRADIDYGFVEARTSAGRIGVKVWINKGEIMPAGYEGVQQGDQRLGDQDTRRRRGG	2060
rpsC_lf.cluster1785	79	Ga0480584_0035885_502_1203	Ga0480584_0035885	1	MMGQKINPIGLRLGINRTWDSRWFAGKNEYGKLLHEDVKIREILHKELKQAAVARIVIERPHKKCRVTIHSARPGVVIGKKGADIDKLRKRVADITASDVVINIVEIRKPELDATLVAESIAQQLERRVAFRRAMKRAVQSAMRLGAEGIRINCSGRLGGAEIARMEWYREGRVPLHTLRADIDYGVATAFTTFGTCGVKVWIFKGEILEHDPMAQDKKMAEGDNTRPRRDAA	2822
rpsC_lf.cluster1786	1	Ga0577627_0099520_2008_2709	Ga0577627_0099520	1	MGQKTRPTGFRVGIVEDWRSRWYASKKEFGDLLGEDFKIRKFIKKKYLFAGIPKIEIERTRDMVIVHLHCARPGIIIGRKGQEVDRLKAELEDLTGRRMDLKIIEINNANRSAQLVAEDIAQQLEKRASFRRTMKRAMDQVMEAGVKGVKVQLSGRLGGAEMSRCEKAARGSIPLSTLQAHIDYGFAQALTAQGMLGVKVWINLGTYAEEEATDGANAKASQVSQKPKKAHKR	3439
rpsC_lf.cluster1787	1	Ga0577635_0373896_176_877	Ga0577635_0373896	1	MGQKVNPIGLRLGINRTWDSRWYAGKNEYGQLLHEDMKIRAELMKQLKQAAVSKIVIERPHKKCRVTIHSARPGVVIGKKGADIEKLRRKVAELTTSDVVINIIEIRKPELDAQLVAESIAQQLERRVAFRRAMKRAVQSAMRLGAGGIRINCSGRLGGAEIARMEWYREGRVPLHTLRADVDYGVATAFTTYGTCGVKVWIFKGEILEHDPMAQDKKMAEGEAGRPRRDATA	1274
rpsC_lf.cluster1788	2	Ga0480586_0008753_267_968	Ga0480586_0008753	1	MGQKVNPIGLRLGINRTWDSRWYAGKAEYGKLLHEDMQIREELMKDLKQAAVSKIVIERPHKKCRVTVQSARPGVVIGKKGADIEKLRRKVASLTQSDVVINIVEIRKPELDAQLVAESIAQQLERRVAFRRAMKRAVQSAMRLGAGGIRINCAGRLGGAEIARMEWYREGRVPLHTLRADVDYGVATAFTTYGTCGVKVWIFKGEILEHDPMAQDKKMAEGDAGRPRRDAAS	4029
rpsC_lf.cluster1789	9	Ga0506675_0285383_224_925	Ga0506675_0285383	1	MGQKVNPVGLRLGINRTWDSRWYAGKAEYGKLLHEDMQIRAELMKDLKQAAVSKIVIERPHKKCRVTVQSARPGVVIGKKGADIEKLRRKVASLTQSDVVINIVEIRKPELDAQLVAESIAQQLERRVAFRRAMKRAVQSAMRLGAGGIRINCAGRLGGAEIARMEWYREGRVPLHTLRADVDYGVATAFTTYGTCGVKVWIFKGEILEHDPMAQDKKMAEGDAGRPRRDATS	1212
rpsC_lf.cluster179	18	Ga0480452_0003267_2327_3349	Ga0480452_0003267	1	LGHKVHPNAFRLGVFRPWEANWFANPKDYTKMLHEDLAMRTAILARLRNAGIAKIETERSSNAQLTVTIHTAKPGIVIGKGGSSVDQLREDLEKRFGNRVRISIQEIKQPELDAQLVAENIASQIERRISYKRAMKQAILRTMRAGAKGVRIYCGGRLRGAEMARREWDREGRVPLHTLRADIDFGRATAKTTFGAIGVKCWIYKDQITPKAKLPITDGAPIGEAIAPQPEAPIDIAPQPVAEAVVAEPVAEAVVAEPVAEAVVAEPVEAQVVEAPAPAVTPKRTRAAAAKPKAEAATAPAKAIAKPAAKAKTAAAPKAEKAPAAKKAPAKKTTTKKADA	10320
rpsC_lf.cluster1790	1	Ga0480584_0053994_311_1012	Ga0480584_0053994	1	MGQKVNPLGIRLGITRDWTSRWYAGKKQFPINVFTDFRVRKFLKARLSEASVSRVLIERAAKKVNITIQTARPGIVIGKKGEDIEKLRQETAKLLGMSVSDVRLNIAEIRKPELDSQLVADSIAQQIEKRVMFRRAMKRAVMSTMRSGALGVTVQHHLRRHRRQGVDLQGRGIRQGSGRSSSGRRRRRCTGCSGFSAGRRRAGPCAGLTHVATQAHQVSQDVQRPQRRPGAAR	2307
rpsC_lf.cluster1791	1	Ga0480480_013088_882_1580	Ga0480480_013088	1	VGQKVHPYGFRLGYNKDWHSHWFAKKQYGEFLLEDLKLKRVLKQRFAGAGVSHVDVERAANRLKIIIYTSRPGIIIGRKGAEIDKLKSDLSAKTGREVLVSIQEIHKPELNAQLQAEKIAAQLEKRIAFRRAMRKAVEESLRFGAQGIKVKVSGRLNGAEIARSEWHLQGQLPLHTLRADIDYGLAEAQTTFGQIGVKVWIYRGEILDAKAAMARGTGSDPINETRMGERERR	1581
rpsC_lf.cluster1792	6	soilwarming_heated_45-60_052018_S19S24S29_1120_2	soilwarming_heated_45-60_052018_S19S24S29_1120	1	MSVTKYFIKDVSRRLEIDELLQRDLKRAGYSRVELTKSPVGTRVVIYAAKPGMVIGRRGQSIKDLTKLLETKFGIENPQLSVATIEIPEQDPKVVASQVAQALQRGVHFRRAAYWAIQRVMESQALGVEIIIRGKLTTERSRFEKFRAGYLPRVGDPVLKSVKVAVADVQLKQGLFGIKVRILPPTVDFIDKPTMKTPPPSVATPPPTVQVPVVESAEVETQKEEPIGNTAQA	5522
rpsC_lf.cluster1793	6	Ga0577619_00226337_696_1397	Ga0577619_00226337	1	MGQKVNPIGLRLGINRTWDSRWFSRKEYGTQLLDDLKLRKFLAGRLTQAAISKVLIERAAKKTRITLHSARPGVVIGKKGVDIDKLRADIAKVTNSEVSLNIVEIRKPEIEAKLIAEGIAQQLERRVAFRRAMKRAVQSAMRFGAQGIRINCGGRLGGAEIARMEWYREGRVPLHTLRADVDYGTATAKTTYGTCGVKVWVFKGEILAHDPMAQDKKLSEGQPAGQERGRRES	3036
rpsC_lf.cluster1794	28	Ga0577637_0008482_1286_1984	Ga0577637_0008482	1	MGQKVNPIGLRLGINRTWDSRWYSGKNEYGQLLHEDMKIRAELMKDLKQAAVSKIMIERPHKKCRVTVQSARPGVVIGKKGADIEKLRKKVTKLTKSDVVINIVEIRKPELDAQLVAESIAQQLERRVAFRRAMKRAVQSAMRLGAGGIRINCSGRLGGAEIARMEWYREGRVPLHTLRADVDYGVATAFTTYGTCGVKVWIFKGEIMEHDPMAQDKKMAEGDVGRPRRDAS	4797
rpsC_lf.cluster1795	2	Ga0577625_0065796_1225_1923	Ga0577625_0065796	1	MGQKVNPIGLRLGINRTWDSRWYAGKNEYGKLLHEDMAIRAELSKELKQAAVSKIVIERPHKKCRVTIHSARPGVVIGKKGADIEKLRKKVAALTNSDVVINILEIRKPELDAQLVAESIAQQLERRVAFRRAMKRAVQSAIRLGAGGIRINCSGRLGGAEIARMEWYREGRVPLHTLRADVDYGVATAFTTYGTCGVKVWIFKGEIMEHDPMAQDKKLAEGDTGRPRRDAA	3631
rpsC_lf.cluster1796	5	Ga0577632_0292348_284_982	Ga0577632_0292348	1	MGQKVNPVGLRLGINRTWDSRWYSGKSEYGQLLHEDMKIREELMKDLKQAAVSKIVIERPHKKCRVTVQSARPGVVIGKKGADIEKLRKKVARLTKSDVVINIVEIRKPELDAQLVAESIAQQLERRVAFRRAMKRAVQSAMRLGAGGIRINCSGRLGGAEIARMEWYREGRVPLHTLRADIDYGVATAFTTYGTCGVKVWIFKGEIMEHDPMAQDKKMAEGEAGRPRREPA	1642
rpsC_lf.cluster1797	1	Ga0577639_0228216_899_1597	Ga0577639_0228216	1	MGQKVNPIGLRLGINRTWDSRWYSGKGEYGQLLHEDMKIRKELMEDLKQAAVSKIIIERPHKKCRVTVQSARPGVVIGKKGADIEKLRKKVAKLTKSDVVINIVEIRKPELDAQLVAESIAQQLERRVAFRRAMKRAVQSAMRLGAGGIRINCSGRLGGAEIARMEWYREGRVPLHTLRADVDYGVATAFTTYGTCGVKVWIFKGEIMEHDPMAQDKKMAEGDAGRPRRDAP	1751
rpsC_lf.cluster1798	5	Ga0480588_0099321_917_1615	Ga0480588_0099321	1	MGQKINPIGLRLGINRTWDSRWFAGKNEYGKLLHEDVKIREILHKELKQAAVARIVIERPHKKCRVTIHSARPGVVIGKKGADIDKLRKRVADITASDVVINIVEIRKPELDSTLVAESIAQQLERRVAFRRAMKRAVQSAMRLGAEGIRINCSGRLGGAEIARMEWYREGRVPLHTLRADIDYGVATAFTTFGTCGVKVWIFKGEILEHDPMAQDKKMAEGETSRPRRDAA	1860
rpsC_lf.cluster1799	7	Ga0577639_0092704_1574_2272	Ga0577639_0092704	1	VGQKVNPIGLRLGINRTWDSRWFAGKAEYGTLLHEDIKIRAALMKELKQAAVSKIIIERPHKKCRVTIHSARPGVVIGKKGADIEKLRKSVAKITASDVVINIVEIRKPELDAQLVAESITQQLERRVAFRRAMKRAVQSAMRLGAEGIRINCTGRLGGAEIARMEWYREGRVPLHTLRADIDYGTSTAFTTYGTCGCKVWIFKGEILEHDPMAQDKKLAEGDAGRPRRENA	2632
rpsC_lf.cluster18	1	Ga0480584_0043285_703_1881	Ga0480584_0043285	1	MGQKVHPGGLRVGVIHDWKSNWMVSTKEFAGALLEDIKIREHIISKLSHAGLSDILIRKDKQRITIDIYTARPGIVIGKSGVEVDALRKDVHALTKKNVHININEIKRPELDAKLVAQSIAEQLQNRVSFRRAMKRSLASAIRSGAAGVKVQCSGRLGGSEMSRSEQYSEGRVPLHTIRADIDYGFTEARTPTGRIGVKVWINKGEIMPAGYGGVPGGGKETRLGEQDTARRRGGVSEGLGASREAGRGRNQDREGLGPVRRGRPGQRGGRPGGPGAPGGPRRDGGERMPRGQQPPEAAEQTPVGQPPVDDGAVGVTPVLAEGVVQEPVAVVEETPVAETPAVAVNTPVSEPAASGAPVAEAPKSEPTSSAPAVKPPRKKSEADRAETEGGD	2576
rpsC_lf.cluster180	7	Ga0577618_0298221_635_1657	Ga0577618_0298221	1	LGHKVHPNAFRLGVFRPWEANWFANPKDYTKMLHEDLAMRTAILARLRNAGIAKIETERSSNAQLTVTIHTAKPGIVIGKGGSSVDQLREDLEKRFGNRVRISIQEIKQPELDAQLVAENIASQIERRISYKRAMKQAILRTMRAGAKGVRIYCGGRLRGAEMARREWDREGRVPLHTLRADIDFGRATAKTTFGAIGVKCWIYKDQITPKARLPISDGAPIGEAIAPQPEAPIEVAPQPLPAAEIAALPDLGAIEIPSPEPAPRPPRATRAKAATATATAAATATPKAPARAKAPAGAKAAKPTAEKPAAAKKAPAKKTTTKSAGPTRTTPRGSTGASS	1916
rpsC_lf.cluster1800	2	Ga0577630_0378112_436_1134	Ga0577630_0378112	1	MGQKVNPIGLRLGINRTWDSRWFAGKNGYGTLLHEDMKIRKELMVLLKQAAVSKIVIERPHKKCRVTIHSARPGVVIGKKGADIEKLRRVVAALTDSDVVINIVEIRKPELDAQLVAESIAQQLERRVAFRRAMKRAVQSAMRLGAGGIRINCSGRLGGAEIARMEWYREGRVPLHTLRADVDYGVATAFTTYGTCGVKVWIFKGEIMEHDPMAQDKKMAEGEAGRPRRDAA	1242
rpsC_lf.cluster1801	3	Ga0577625_0020866_1871_2569	Ga0577625_0020866	1	MGQKVNPIGLRLGINRTWDSRWFAGKSEYGTLLHEDIKIRAVLMKELKQAAVAKIIIERPHKKCRVTIHSARPGVVIGKKGADIEKLRKQVSKITASDVVINIVEIRKPELDAQLVAESITQQLERRVAFRRAMKRAVQSAMRLGAEGIRINCTGRLGGAEIARMEWYREGRVPLHTLRADVDYGTSTAFTTYGTCGCKVWIFKGEILEHDPQAQDKKLAEGDAGRPRRENA	6526
rpsC_lf.cluster1802	11	Ga0577616_0617067_192_890	Ga0577616_0617067	1	MGQKINPIGLRLGINRTWDSRWYAGKNEYGKLLHEDVKIREVLHKELKQAAVARIVIERPHKKCRVTIHSARPGVVIGKKGADIDKLRKKVADITASDVVINIVEIRKPELDATLVAESIAQQLERRVAFRRAMKRAVQSAMRLGAEGIRINCSGRLGGAEIARMEWYREGRVPLHTLRADIDYGVATAFTTFGTCGVKVWIFKGEILEHDPMAQDKRMAEGDNTRPRRDAA	1020
rpsC_lf.cluster1803	9	soilwarming_2_unheated_45-60_052018_S9_47374_3	soilwarming_2_unheated_45-60_052018_S9_47374	1	MSVTKYFIKDVSRRLEIDELLQRDLKRAGYSRVELTKSPVGTRVVIYAAKPGMVIGRRGQSIKDLTKLLETKFGIENPQLSVATIEIPEQDPKVVASQVAQALQRGVHFRRAAYWAIQRVMESQALGVEIIIRGKLTTERSRFEKFRAGYLPRVGDPVLKSVKVAVTDVQLKQGLFGIKVRILPPTVDFIDKPTMKTPPPSVSPTPIVQAATVESVVVETEKEEPIGNTAQA	1594
rpsC_lf.cluster1804	11	Ga0577643_00430294_64_762	Ga0577643_00430294	1	MGQKVNPIGLRLGINRTWDSRWYSGKNEYGQLLHEDMKIRAELMKDLKQAAVSKIVIERPHKKCRVTVQSARPGVVIGKKGADIEKLRKKVAKLTKSDVVINIVEIRKPELDAQLVAESIAQQLERRVAFRRAMKRAVQSAMRLGAGGIRINCSGRLGGAEIARMEWYREGRVPLHTLRADVDYGVATAFTTYGTCGVKVWIFKGEIMEHDPMAQDKKMAEGEAGRPRREPT	1700
rpsC_lf.cluster1805	8	Ga0577640_0245945_17_715	Ga0577640_0245945	1	MGQKINPIGLRLGINRTWDSRWFAGKTEYGQLLHEDIAIRKQLMQDLKQAAVAKIIIERPHRKCRVTVQSARPGVVIGKKGADIEKLRRKVARLTKSDVVINIVEIRKPELDAQLVAESISQQLERRVAFRRAMKRAVQSAMRLGAGGIRINCSGRLGGAEIARMEWYREGRVPLHTLRADVDYGVATAFTTYGTCGVKVWIFKGEIMEHDPMAQDKKMAEGDSGRPRRDAS	1446
rpsC_lf.cluster1806	7	Ga0480584_0088681_864_1562	Ga0480584_0088681	1	MGQKINPIGLRLGINRTWDSRWYAGKNEYGKLLHEDVRIREILHKELKQAAVARIVIERPHKKCRVTIHSARPGVVIGKKGADIDKLRKKVADITASDVVINIVEIRKPELDATLVAESIAQQLERRVAFRRAMKRAVQSAMRLGAEGIRINCSGRLGGAEIARMEWYREGRVPLHTLRADIDYGVATAFTTFGTCGVKVWIFKGEILEHDPMAQDKRMAEGDNSRPRRDAA	1797
rpsC_lf.cluster1807	5	soilwarming_2_heated_60-80_052018_S25_641_15	soilwarming_2_heated_60-80_052018_S25_641	1	MSVTKYFIKDVSRRLEIDELLQRDLKRAGYSRVELTKSPVGTRVVIYAAKPGMVIGRRGQSIKDLTKLLETKFGIENPQLSVATIEIPEQDPKVVASQVAQALQRGVHFRRAAYWAIQRVMESQALGVEIIIRGKLTTERSRFEKFRAGYLPRVGDPVLKSVKVAVADVQLKQGLFGIKVRILPPTVDFIDKPTMKTPPPSVAATTTVQTPVAENVEVETEKEEPIGNTAQA	11115
rpsC_lf.cluster1808	1	Ga0577625_0489727_114_812	Ga0577625_0489727	1	MGQKVNPTGYRTGITEDWKSKWYAPKHAYGTFLVEDFKIRKLIDARLNRRPPFAAVAEILIERTREEIPITLRTARPGLVIGPKGAEVDKLREELEDMIHRKVAPVKVIEIKNPDLNGQLVAEAVAEQLKKRASFRRVLKMRMDSTMQAGAKGIKIQVSGRLGGAEIARQEKAGQGSVPLTTLQADISYGYAIAYTTFGTIGVKAWIYRGMYGEEVLETDVRPGGPMRRGRR	1279
rpsC_lf.cluster1809	18	soilwarming_2_heated_50-60_052016_S44_17370_4	soilwarming_2_heated_50-60_052016_S44_17370	1	MSVTKYFIKDVSRRLEIDELLQRDLKRAGYSRVELTKSPVGTRVVIYAAKPGMVIGRRGQSIKDLTKLLETKFGIENPQLSVATIEIPEQDPKVVASQVAQALQRGVHFRRAAYWAIQRVMESQALGVEIIIRGKLTTERSRFEKFRAGYLPRVGDPVLKSVKVAVTDVQLKQGLFGIKVRILPPTVDFIDKPTMKTPPPSVAPTLTVQAPTVESAVVETEKEEPIGNTAQA	1679
rpsC_lf.cluster181	1	Ga0577634_0231911_1_1017	Ga0577634_0231911	1	MGQKVHPGGLRVGVIHDWKSNWWVGKKEFPQYLIEDIRIREHIYKKLSHAGLSDILIRKDKQRITVDIYTARPGIVIGKSGVEVDALRKELHSITGKNVHININEIKRPELDAKLVAQSIAEQLQNRVSFRRAMKRALASGMRSGAQGIKIRVGGRLGGAEMSRSETYSEGRVPLHTIRADIDYGFVEAKTTFGRIGVKVWINKGEIMPEGYGGAAEGTRLGDQDQARRRGGALEGLGASRESARNRSQDREGLGPVKRRRGPGGPGGPGGAKRSGGRPGSARPRSSDRARGEGRDRPLVDPKALADRTSTPAAETPTVIEPQVEATPAPVTDAPVEPT	2341
rpsC_lf.cluster1810	3	Ga0577618_0780303_191_889	Ga0577618_0780303	1	MGQKVNPVGLRLGINRTWDSRWYAGKASYGSLLHEDMEIRKALMKELKQAAVSKIVIERPHKKCRVTIHSARPGVVIGKKGADIEKLRRKVAELTDSDVVINIVEIRKPELDAQLVAESIAQQLERRVAFRRAMKRAVQSAMRLGAGGIRINCSGRLGGAEIARMEWYREGRVPLHTLRADVDYGVATAFTTYGTCGVKVWIFKGEIMEHDPMAQDKKMAEGEVGRPRRDAA	1099
rpsC_lf.cluster1811	6	Ga0577617_0458566_451_1149	Ga0577617_0458566	1	LSVTKYFIKDVSRRLEIDELLQRDLKRAGYSRVELTKSPVGTRVVIYAAKPGMVIGRRGQSIKDLTKLLETKFGIENPQLSVATIEIPEQDPKVVASQIAQALQRGVHFRRAAYWAIQRVMESQALGVEIVIRGKLTTERSRFEKFRAGYLPRVGDPVLKSVKVAVTDVQLKQGLFGIKVRILPPTVDFIDKPTMKTPPPSVSPTPIVQAATVESLVVETEKEEPVGNTAQA	1325
rpsC_lf.cluster1812	8	Ga0577624_0077036_136_834	Ga0577624_0077036	1	MGQKINPIGLRLGINRTWDSRWFAGKNEYGKLLHEDVKIREILHKELKQAAVARIVIERPHKKCRVTIHSARPGVVIGKKGADIDKLRKRVADITASDVVINIVEIRKPELDATLVAESIAQQLERRVAFRRAMKRAVQSAMRLGAEGIRINCSGRLGGAEIARMEWYREGRVPLHTLRADVDYGVATAFTTFGTCGVKVWIFKGEILEHDPMAQDKKMAEGEGSRPRRDAA	3455
rpsC_lf.cluster1813	4	Ga0480586_0050051_854_1552	Ga0480586_0050051	1	MGQKVNPIGLRLGINRTWDSRWYSGKSEYGQLLHEDMKIREALMKDLKQAAVSKIVIERPHKKCRVTVQSARPGVVIGKKGADIEKLRKKVMKLTQSDVVINIVEIRKPELDAQLVAESIAQQLERRVAFRRAMKRAVQSAMRLGAGGIRINCSGRLGGAEIARMEWYREGRVPLHTLRADVDFGVATAFTTYGTCGVKVWIFKGEIMEHDPMAQDKKMAEGEAGRPRRDGA	2002
rpsC_lf.cluster1814	22	Ga0577621_0121654_283_981	Ga0577621_0121654	1	MGQKVNPIGLRLGINRTWDSRWYAGKNDYGKLLHEDMAIRKELSAALKQAAVSKIVIERPHKKCRVTIQSARPGVVIGKKGADIEKLRKTVAKLTDSDVVINIVEIRKPELDAQLVAESISQQLERRVAFRRAMKRAVQSAMRLGAEGIRINCAGRLGGAEIARTEWYREGRVPLHTLRADVDFGVATAFTTYGTCGVKVWIFKGEILEHDPMAQDKKMAEGDQGRPRRDAA	2087
rpsC_lf.cluster1815	66	Ga0577619_01005877_364_1062	Ga0577619_01005877	1	MGQKINPIGLRLGINRTWDSRWFAGKAEYGKLLHEDVKIREILHKELKQAAVARIVIERPHKKCRVTIHSARPGVVIGKKGADIDKLRKRVADITASDVVINIVEIRKPELDATLVAESIAQQLERRVAFRRAMKRAVQSAMRLGAEGIRINCSGRLGGAEIARMEWYREGRVPLHTLRADIDYGVATAFTTFGTCGVKVWIFKGEILEHDPMAQDKKMAEGDSSRPRRDAA	1325
rpsC_lf.cluster1816	28	Ga0577619_00002198_2314_3012	Ga0577619_00002198	1	MGQKVNPIGLRLGINRTWDSRWYSGKSEYGQLLHEDMKIRQELMKDLKQAAVSKIVIERPHKKCRVTVQSARPGVVIGKKGADIEKLRRKVANLTKSDVVINIVEIRKPELDAQLVAESIAQQLERRVAFRRAMKRAVQSAMRLGAGGIRINCAGRLGGAEIARMEWYREGRVPLHTLRADVDYGVATAFTTYGTCGVKVWIFKGEIMEHDPLAQDKKLAEGEAGRPRRDAS	22096
rpsC_lf.cluster1817	4	Ga0577639_0594804_3_698	Ga0577639_0594804	1	MGQKTNPIGFRLGISKQWNSRYYAGRELPALLREDELLRKYLKARLGHAAIANIVIERKPGKVVVTLHTGRPGVVIGKKGAEVDKLRDELAHLTGKEVGINVEEIKRPELDAQLVADNIAAQLAQRISFRRAMKRGSAAPRSRAWKGTTRGVCPSTPCAPTSTTRSRRPRRPTARSASRSGSSRAKSWRRVPAPRTPAGSKEPTDAESEARQVPEDVQGPDEGAEPAWQHGG	1088
rpsC_lf.cluster1818	8	soilwarming_2_unheated_45-60_052018_S9_599_14	soilwarming_2_unheated_45-60_052018_S9_599	1	MGQKVNPIGFRLGVNRDWRSRWYASPQELPAFLHSDLEIRAYVKKKLQFAAVAKIVIERAWNSIRVTIHTARPGIVIGRKGAEIEKMTEEISKMAQGKQIKIDIQEIKTPELDAQLVAENVSLQIERRIAYRRAMKKAVQTAMDFGAEGIRLRCSGRLNGAEISRSEWYREGKVPLHTLRTAIDYGFAEANTVYGKIGVKCWICKKEEAPSEAPVAMAPPPPPPPPAEPVEA	13938
rpsC_lf.cluster1819	1	Ga0480584_0026311_84_782	Ga0480584_0026311	1	MGQKVNPVGLRLGINRTWDSRWYAGKASYGTLLHEDMEIRKALMKELKQAAVSKIVIERPHKKCRVTVHSARPGVVIGKKGADIEKLRRKVAELTDSDVVINIIEIRKPELDAQLVAESIAQQLERRVAFRRAMKRAVQSAMRLGAGGIRINCAGRLGGSEIARMEWYREGRVPLHTLRADVDYGVATAFTTYGTCGVKVWIFKGEIMEHDPMAQDKKMAEGDAGRPRRDAA	3281
rpsC_lf.cluster182	3	soilwarming_1_unheated_60-80_052018_S5_9280_5	soilwarming_1_unheated_60-80_052018_S5_9280	1	MGHKVHPNGFRLGVYRNWESKWFATDKEFSALLLEDVKLRKMLFARLKNAGVARIETERSSSALTITLHTAKPGIVIGKGGTSVDQLRDELEKMTKKRVRVTIQEIKKPELSAQLVAESVAAQLEKRIAFRRAVKQSLMKTMRAGAQGVKIRVKGRLGGSEMARIEWNREGRVPLHTLKADIDFGQTEAKTTFGRIGVSAWVYTGDFPTERPKKVAEEPTDGEVPVAAALAETPLVAEALGLPVAIPAEPVPVPVAVVEPEPEPAVSVPAAAAEPAARPARRRTTATATAPSEAPAKPRRAPRAVKATTEEAAPKQKRATRATSAEPKPATRRTAKKKE	3304
rpsC_lf.cluster1820	16	Ga0577634_0270339_1250_1948	Ga0577634_0270339	1	MGQKINPIGLRLGINRTWDSRWFAGKNEYGKLLHEDVKIREILHKELKQAAVARIVIERPHKKCRVTIHSARPGVVIGKKGADIDKLRKKVADITTSDVVINIVEIRKPELDATLVAESIAQQLERRVAFRRAMKRAVQSAMRLGAEGIRINCSGRLGGAEIARMEWYREGRVPLHTLRADIDYGVATAFTTFGTCGVKVWIFKGEILEHDPMAQDKKMAEGETSRPRRDAA	2150
rpsC_lf.cluster1821	23	Ga0480584_0003821_3366_4064	Ga0480584_0003821	1	MGQKVNPIGLRLGINRTWDSRWYSGKSEYGQLLHEDMKIREALMKDLKQAAVSKIVIERPHKKCRVTVQSARPGVVIGKKGADIEKLRKKVMKLTQSDVVINIVEIRKPELDAQLVAESIAQQLERRVAFRRAMKRAVQSAMRLGAGGIRINCSGRLGGAEIARMEWYREGRVPLHTLRADVDYGVATAFTTYGTCGVKVWIFKGEIMEHDPMAQDKKMAEGEAGRPRRDAS	7796
rpsC_lf.cluster1822	1	Ga0480452_0018971_1764_2462	Ga0480452_0018971	1	LSVTKYFIKDVSRRLEIDELLQRDLKRAGYSRVELTKSPVGTRVVIYAAKPGMVIGRRGQSIKDLTKLLETKFGIENPQLSVATIEIPEQDPKVVASQVAQALQRGVHFRRAAYWAIQRVMESQALGVEIIIRGKLTTERSRFEKFRAGYLPRVGDPVLKSVKVAVADVQLKQGLFGIKVRILPPTVDFIDKPTMKTPPPSVAPTPTVQAPVAENVEVETKKEEPIGNIAQA	4623
rpsC_lf.cluster1823	6	Ga0480480_021206_48_746	Ga0480480_021206	1	MGQKVNPIGLRLGINRTWDSRWYAGKGEYGQLLHEDIAIRKELHDQLKQAAVSRIVIERPHKKCRVTIQSARPGVVIGKKGADIEKLRKKVAALTDSDVVINIVEIRKPELDAQLVAESIAQQLERRVAFRRAMKRAVQSAMRLGAEGIRINCSGRLGGAEIARMEWYREGRVPLHTLRADVDYGVATAFTTYGTCGVKVWIFKGEILEHDPMAQDKKMAEGDSSRPRRDAA	1277
rpsC_lf.cluster1824	1	Ga0577632_0197962_1341_2039	Ga0577632_0197962	1	EELRRTLEAMTGKRIRVTIQEIRQPEIDAFLVARSIADQLEKRVAFRRAMKQAVQHAQRFGAKGVRVQVSGRLGGSEMSRREWDRWGRVPLHTLRADIDYGQTEAHTTYGIIGVKVWIYRGDFTPDGRSPEEVAAEQRQPDRRGPRATVRAEVPEAPAPEVAPPAVPAEIDYSLGGVFDPGEESGELKPRGQRTEPEAAAPQPPAPPTRPAPTPPSPSTRTEGTGPSSRTEE	2040
rpsC_lf.cluster1825	4	Ga0577624_0000404_18323_19021	Ga0577624_0000404	1	MGQKVNPIGLRLGINRTWDSRWYSGKNEYGELLHEDMKIRKELMKDLKQAAVSKIVIERPHKKCRVTVQSARPGVVIGKKGADIEKLRRKVANLTKSDVVINIVEIRKPELDAQLVAESIAQQLERRVAFRRAMKRAVQSAMRLGAGGIRINCSGRLGGAEIARMEWYREGRVPLHTLRADVDYGFATAFTTYGTCGVKVWIFKGEIMEHDPMAQDKKLAEGEPGRPRRDMS	39727
rpsC_lf.cluster1826	20	soilwarming_2_unheated_50-60_052016_S35_33301_2	soilwarming_2_unheated_50-60_052016_S35_33301	1	MSVTKYFIKDVSRRLEIDELLQRDLKRAGYSRVELTKSPVGTRVVIYAAKPGMVIGRRGQSIKDLTKLLETKFGIENPQLSVATIEIPEQDPKVVASQVAQALQRGVHFRRAAYWAIQRVMESQALGVEIIIRGKLTTERSRFEKFRAGYLPRVGDPVLKSVKVAVTDVQLKQGLFGIKVRILPPTVDFIDKPTMKTPPPSVAPTLTVQAPVAENVEVETEKEEPIGNTAQA	1107
rpsC_lf.cluster1827	1	Ga0577624_0004274_4310_5008	Ga0577624_0004274	1	MGQKVNPIGLRLGINRTWDSRWYAGKGGYGVLLHEDMKIRDDLMKQLKQAAVSKIVIERPHKKARVTIHSARPGVVIGKKGADIEKLRRRVAELTDSDVVINIVEIRKPELDAQLVAESIAQQLERRVAFRRAMKRAVQSAMRLGAGGIRINCSGRLGGAEIARMEWYREGRVPLHTLRADVDYGVATAYTTYGTCGVKVWIFKGEIMEHDPMAQDKRLAESEAGRPRRDAA	13853
rpsC_lf.cluster1828	1	Ga0577631_0068202_815_1513	Ga0577631_0068202	1	MGQKIHPLSFRLGITKGWPVRWFIKGGYAKFLEEDEAIRKTIMKRIGLAGISAIEIERTQGNLRIYIKAARPGLIIGRGGKGVEDLNTAIANELRKLRKTKNPIPMSVNIEELKRSEVSAIYVGQQIAWDLEKRMPFRRTMKKYIEQVMQSKEVKGVKIFLSGRLDGNEIARREHLSRGSLPLQTLRADIDYGQVTAYTTYGTIGIRVWVYKGEIFTKKTDAQKTPPAGRRQ	2655
rpsC_lf.cluster1829	3	Ga0480584_0264570_158_856	Ga0480584_0264570	1	MGQKINPIGLRLGINRTWDSRWFAGKNEYGKLLHEDVEIREILHKELKQAAVARIVIERPHKKCRVTIHSARPGVVIGKKGADIDKLRKKVADITDSDVVINIVEIRKPELDATLVAESIAQQLERRVAFRRAMKRAVQSAMRLGAEGIRINCSGRLGGAEIARMEWYREGRVPLHTLRADIDYGVATAFTTFGTCGVKVWIFKGEILEHDPMAQDKKMAEGDTSRPRRDAA	1004
rpsC_lf.cluster183	2	Ga0577619_00666524_17_1036	Ga0577619_00666524	1	LGHKVHPNAFRLGVFRPWEANWFANPKDYTKMLHEDLQMRGAILARLRNAGIAKIETERSSNAQLTVTIHTAKPGIVIGKGGSSVDQLREDLEKRFGNRVRISIQEIKQPELNAQLVAENIASQIERRISYKRAMKQAILRTMRAGAKGVRIYCGGRLRGAEMARREWDREGRVPLHTLRADIDFGRATAKTTFGAIGVKCWIYKDQISPKARLPITDGAPIGDAIAPQPEAPVEAAPQPVAVVETAPAEVVTAPIVAEVAAPEAAPKRARATASAAAKPKAEVATATKPARPPAKTPAKAPAKAAAKSAAPKATAPKAEKAPAPKKAPAKKAIEKKAK	1690
rpsC_lf.cluster1830	11	soilwarming_2_heated_0-10_052018_S21_194_17	soilwarming_2_heated_0-10_052018_S21_194	1	MGQKINPIGLRLGINRTWDSRWYAGKNEYGKLLHEDVKIREVLHKELKQAAVARIVIERPHKKCRVTIHSARPGVVIGKKGADIDKLRKKVADITASDVVINIVEIRKPELDATLVAESIAQQLERRVAFRRAMKRAVQSAMRLGAEGIRINCSGRLGGAEIARMEWYREGRVPLHTLRADVDYGVATAFTTFGTCGVKVWIFKGEILEHDPMAQDKKMAEGDSGRPRRDAA	8986
rpsC_lf.cluster1831	1	Ga0577625_0132102_105_803	Ga0577625_0132102	1	MGQKVNPIGLRLGINRTWDSRWYAGKNEYGALLHEDMKIRKELMTALKQAAVSKIVIERPHKKCRVTVHSARPGVVIGKKGADIEKLRKSVAKLTDSDVVINIIEIRKPELDATLVAESIAQQLERRVAFRRAMKRAVQSAVRLGAQGIRINCSGRLGGAEIARMEWYREGRVPLHTLRADVDYGVATAFTTYGTCGVKVWIFKGEIMEHDSMAQDKRLAEAEAGRPSRREA	2550
rpsC_lf.cluster1832	2	Ga0480584_0097757_445_1143	Ga0480584_0097757	1	MGQKVNPIGLRLGINRTWDSRWYAGKNEYGRLLLEDIKIRAALMKQLKQAAVSKIIIERPHKKCRVTIQSARPGVVIGKKGADIEKLRKKVAELTESDVVINIVEIRKPELDAQLVAESIAQQLERRVAFRRAMKRAVQSAMRLGAGGIRINCSGRLGGAEIARMEWYREGRVPLHTLRADVDYGVATGFTTYGTCGVKVWIFKGEILEHDPMAQDKKMAEGDVGRPRRDAA	1709
rpsC_lf.cluster1833	1	Ga0480455_00102019_165_863	Ga0480455_00102019	1	MGQKVNPIGLRLGINRTWDSRWFADGDYAKLLHEDLKLRTYLRTKLVQAGVSRVVIERPAKRARVTIHSARPGVVIGKKGADIEVLRKALSRMTGNEVHLNIVEIRKPELDAQLVAENIAQQLERRVAFRRAMKRAVQSAMRLGALGIRINCSGRLGGAEIARMEWYREGRVPLHTLRADVDYGVGSAKTTYGVCGVKVWVFKGEIMAHDPMAQDKRALEGQTPTGRDGASR	3800
rpsC_lf.cluster1834	40	soilwarming_2_unheated_30-45_052018_S8_11457_3	soilwarming_2_unheated_30-45_052018_S8_11457	1	MGQKINPIGLRLGINRTWDSRWYAGKNEYGKLLHEDVKIREMLHKELKQAAVARIVIERPHKKCRVTIHSARPGVVIGKKGADIDKLRKRVADITASDVVINIVEIRKPELDATLVAESIAQQLERRVAFRRAMKRAVQSAMRLGAEGIRINCSGRLGGAEIARMEWYREGRVPLHTLRADIDYGVATAFTTFGTCGVKVWIFKGEILEHDPMAQDKKMAEGDTSRPRRDAA	1745
rpsC_lf.cluster1835	1	Ga0480585_0000394_9776_10474	Ga0480585_0000394	1	MGQKVNPIGLRLGINRTWDSRWFSGKNEYGKLLHEDMAIRAELLKQLKQAAVAKIIIERPHKKCRVTIHSARPGVVIGKKGADIEKLRKKVAALTDSDVVINIVEIRKPELDAQLVAESISQQLERRVAFRRAMKRAVQSAMRLGAEGIRINCSGRLGGAEIARMEWYREGRVPLHTLRADVDYGVSTAFTTYGTCGVKVWIFKGEILEHDPMAQDKRAAEADAGRPRRDAA	12890
rpsC_lf.cluster1836	2	Ga0577619_00304197_1184_1882	Ga0577619_00304197	1	MGQKVNPIGLRLGINRTWDSRWYAGKASYGALLHEDMKIRKALMAELKQAAVSKIVIERPHKKCRVTIHSARPGVVIGKKGADIEKLRRKVAALTDSDVVINIVEIRKPELDAQLVAESIAQQLERRVAFRRAMKRAVQSAMRLGAGGIRINCSGRLGGAEIARMEWYREGRVPLHTLRADVDYGVATAFTTYGTCGVKVWIFKGEIMEHDPMAQDKRMAEVEAGRPRRDAA	2605
rpsC_lf.cluster1837	2	soilwarming_3_unheated_10-20_052016_S37_114_7	soilwarming_3_unheated_10-20_052016_S37_114	1	MGQKVNPIGLRLGINRTWDSRWYAGKNEYGKLLHEDIAIRAALNKELKQAAVSRIVIERPHKKCRVTIHSARPGVVIGKKGADIEKLRKKVAQLTASDVVINIVEIRKPELDAQLVSESISQQLERRVAFRRAMKRAVQSAMRLGAGGIRINCSGRLGGAEIARMEWYREGRVPLHTLRADVDYGVSTAFTTYGTCGVKVWIFKGEIMEHDPMAQDKKMAEGDQGRPRRDAA	36831
rpsC_lf.cluster1838	14	Ga0577641_0542720_58_756	Ga0577641_0542720	1	MGQKVNPIGLRLGINRTWDSRWYAGKNEYGRLLLEDIKIRAELMKQLKQAAVSKIVIERPHKKCRVTIQSARPGVVIGKKGADIEKLRKKVAELTDSDVVINIIEIRKPELDAQLVAESIAQQLERRVAFRRAMKRAVQSAMRLGAGGIRINCSGRLGGAEIARMEWYREGRVPLHTLRADVDYGVATAFTTYGTCGVKVWIFKGEILEHDPMAQDKKMAEGDAGRPRRDAA	1184
rpsC_lf.cluster1839	2	Ga0577643_00015920_3389_4087	Ga0577643_00015920	1	LSVTKYFIKDVSRRLEIDELLQRDLKRAGYSRVELTKSPVGTRVVIYAAKPGMVIGRRGQSIKDLTKLLETKFGIENPQLSVATIEIPEQDPKVVASQVAQALQRGVHFRRAAYWAIQRVMESQALGVEIIIRGKLTTERSRFEKFRAGYLPRVGDPVLKSVKVAVTDVQLKQGLFGIKVRILPPTVDFIDKPTMKTPPPSVAPTTTVQTPVAENVEVETEKEEPIGNTAQA	7465
rpsC_lf.cluster184	2	Ga0480449_0332779_2_1021	Ga0480449_0332779	1	REYRDLLLEDMKMRQLITNRLRNASISKVETERSANQVTVIIWTAKPGIVIGKGGASVDQLRDDLEKLSGKRVRVTIQEIKHPELDAALVAQNVASQLERRIAFRRAIKQGVLRTMRAGAKGVKIAVAGRLGGAEMSRREWDRDGRVPLHTLKANIDFGQTDARTTFGRIGVSVWVYVGDFDTSWKAEDTFEEIPARLLDGGEPHAAGRVATPLAAAVAAPAAAPSAAAPSPAAAEPAPEAPDAGAPAGEPSTEPAAATATASEGPAKPRARRTSKAALAESEADAKAAPKRPARRPVGRADNAATKDSTLTKKPARGSTKSATGGARTSTGREKEKKQ	1188
rpsC_lf.cluster1840	2	Ga0577636_0115727_595_1293	Ga0577636_0115727	1	MGQKVNPLGLRLGINRTWDSRWYSGKNEYSQLLHEDMKIREELMKDLKQAAVSKIVIERPHKKCRVTVQSARPGVVIGKKGADIEKLRKKVTKLTKSDVVINIVEIRKPELDAQLVAESIAQQLERRVAFRRAMKRAVQSAMRLGAGGIRINCSGRLGGAEIARMEWYREGRVPLHTLRADVDYGVATAFTTYGTCGVKVWIFKGEIMEHDPMAQDKKMAEGDVGRPRRDVA	1675
rpsC_lf.cluster1841	4	Ga0580224_0066764_705_1403	Ga0580224_0066764	1	LSVTKYFIKDASRRLEIDELLQRDLKRAGYSRVELTKSPVGTRVVIYAAKPGMVIGRRGQSIKDLTKLLETKFGIENPQLSVATIEIPEQDPKVVASQVAQALQRGVHFRRAAYWAIQRVMESQALGVEIIIRGKLTTERSRFEKFRAGYLPRVGDPVLKSVKVAVADVQLKQGLFGIKVRILPPTVDFIDKPTMKTPPPSVAPTPTVQAPVAENVELETEKEEPIGNTAQA	1831
rpsC_lf.cluster1842	23	Ga0577617_0206885_1072_1770	Ga0577617_0206885	1	MGQKVNPIGLRLGINRTWDSRWYSGKNEYGQLLHEDMKIRAALMKDLKQAAVSKIVIERPHKKCRVTVQSARPGVVIGKKGADIEKLRKKVTKLTKSDVVINIVEIRKPELDAQLVAESIAQQLERRVAFRRAMKRAVQSAMRLGAGGIRINCAGRLGGAEIARMEWYREGRVPLHTLRADVDYGVATAFTTYGTCGVKVWIFKGEIMEHDPMAQDKKMAEGEAGRPRRDAP	2047
rpsC_lf.cluster1843	10	Ga0480590_0016000_577_1275	Ga0480590_0016000	1	MGQKINPIGLRLGINRTWDSRWYAGKNEYGKLLHEDVKIREMLHKELKQAAVARIVIERPHKKCRVTIHSARPGVVIGKKGADIDKLRKRVADITASDVVINIVEIRKPELDATLVAESIAQQLERRVAFRRAMKRAVQSAMRLGAGGIRINCSGRLGGAEIARMEWYREGRVPLHTLRADVDYGVATAFTTFGTCGVKVWIFKGEILEHDPMAQDKKMAEGDSSRPRRDAA	2816
rpsC_lf.cluster1844	1	Ga0577626_0266658_412_1110	Ga0577626_0266658	1	MGQKINPIGLRLGINRTWDSRWYAGKAEYGSLLQEDIKIRAELMKLLKQAAVSKIVIERPHKKCRVTIHSARPGVVIGKKGSDIEKLRKAVAKMTDSDVVINIVEIRKPELDATLVAESIAQQLERRVAFRRAMKRAVQTSMRLGAQGIRINCSGRLGGAEIARMEWYREGRVPLHTLRADVDYGVATAFTTYGTCGVKVWIFKGEIMEHDPMAQDKKMAEGDVGRPRRDAS	2133
rpsC_lf.cluster1845	12	Ga0577619_00059123_757_1455	Ga0577619_00059123	1	MGQKVNPIGLRLGINRTWDSRWYAGKGGYGVLLHEDMKIRDDLMKQLKQAAVSKIVIERPHKKARVTIHSARPGVVIGKKGADIEKLRRRVAELTDSDVVINIVEIRKPELDAQLVAESIAQQLERRVAFRRAMKRAVQSAMRLGAEGIRINCSGRLGGAEIARMEWYREGRVPLHTLRADVDYGIATAFTTYGTCGVKVWIFKGEIMEHDPMAQDKRLAESEAGRPRRDAA	5695
rpsC_lf.cluster1846	5	soilwarming_1_heated_50-60_052016_S41_17766_2	soilwarming_1_heated_50-60_052016_S41_17766	1	MGQKVNPIGLRLGINRTWDSRWYAGKNEYGRLLLEDIKIRKELMKQLKQAAVSKIVIERPHKKCRVTIQSARPGVVIGKKGADIEKLRKKVAELTDSDVVINIVEIRKPELDAQLVAESIAQQLERRVAFRRAMKRAVQSAMRLGAGGIRINCSGRLGGAEIARMEWYREGRVPLHTLRADVDYGVATGFTTYGTCGVKVWIFKGEILEHDPMAQDKKMAEGDVGRPRRDAA	1531
rpsC_lf.cluster1847	2	Ga0577618_0173491_1009_1707	Ga0577618_0173491	1	LSVTKYFIKDVSRRLEIDELLQRDLKRAGYSRVELTKSPVGTRVVIYAAKPGMVIGRRGQSIKDLTKLLETKFGIENPQLSVATIEIPEQDPKVVASQVAQALQRGVHFRRAAYWAIQRVMESQALGVEIIIRGKLTTERSRFEKFRAGYLPRVGDPVLKSVKVAVADVQLKQGLFGIKVRILPPTVDFIDKPTMKTPPPTVAPTPTVQTPVVEGADVETLKEEPIGNTAQA	2561
rpsC_lf.cluster1848	2	Ga0577625_0081732_1960_2658	Ga0577625_0081732	1	MGQKVNPIGLRLGINRTWDSRWYAGKSEYGTLLHEDMAIRKELMKLLKQAAVSKIVIERPHKKCRVTIQSARPGVVIGKKGADIEKLRKVVAALTQSDVVINIVEIRKPELDAQLVAESIAQQLERRVAFRRAMKRAVQSAMRLGAEGIRINCSGRLGGAEIARMEWYREGRVPLHTLRADVDYGVATGFTTYGTCGVKVWIFKGEIMEHDPMAQDKKMAEGDSGRPRRDAA	3258
rpsC_lf.cluster1849	10	Ga0577625_0171388_1406_2104	Ga0577625_0171388	1	MGQKINPIGLRLGINRTWDSRWFAGKNEYGKLLHEDVKIREILHKELKQAAVARIVIERPHKKCRVTIHSARPGVVIGKKGADIDKLRKKVAEITDSDVVINIVEIRKPELDATLVAESIAQQLERRVAFRRAMKRAVQSAMRLGAEGIRINCSGRLGGAEIARMEWYREGRVPLHTLRADIDYGVATAFTTFGTCGVKVWIFKGEILEHDPMAQDKRMAEGESGRPRRDAA	2230
rpsC_lf.cluster185	1	Ga0577634_0093241_1131_2150	Ga0577634_0093241	1	MGHKVHPNGFRLGVYRNWESKWFATDKEFSALLLEDVKLRKMLFSRLKNAGVARIETERSSSALTITLHTAKPGIVIGKGGTSVDQLRDELEKMTKKRVRVTIQEIKKPELSAQLVAESVAAQLEKRIAFRRAVKQSLMKTMRAGAQGVKIRVKGRLGGSEMARIEWNREGRVPLHTLKADIDFGQTEAKTTFGRIGVSAWVYTGDFPTEQPKRIIEEPSDGEVPVAAALAETPLAAEVLGLPVPVTPEPVAAPVAVAEPEPATVAGVAPEAAAVRPTRRRTTAPAAAPSDAAAAKPKRAPRAAKATIEEAAPKPKRTARAATTTAAKPATKRTAKKKE	3755
rpsC_lf.cluster1850	2	Ga0577625_0160809_245_943	Ga0577625_0160809	1	MGQKVNPIGLRLGINRTWDSRWFSGKNDYGKLLHEDMKIREDLSEALKQAAVSKIVIERPHKKCRVTIHSARPGVVIGKKGADIEKLRKMVAKLTDSDVVINILEIRKPELDAQLVAESISQQLERRVAFRRAMKRAVQSAMRLGAEGIRINCSGRLGGAEIARMEWYREGRVPLHTLRADVDFGVATAFTTYGTCGVKVWIFKGEIMEHDPMAQDKKMAEGEAGRPRRDAS	2305
rpsC_lf.cluster1851	1	Ga0480584_0040672_1526_2224	Ga0480584_0040672	1	MGQKVNPIGLRLGINRTWDSRWYAGKNEYGRLLLEDIKIRAELMKQLKQAAVSKIVIERPHKKCRVTIQSARPGVVIGKKGADIEKLRKKVAELTDSDVVINIVEIRKPELDAQLVSESIAQQLERRVAFRRAMKRAVQSAMRLGAGGIRINCAGRLGGAEIARMEWYREGRVPLHTLRADVDYGVATAFTTYGTCGVKVWIFKGEILEHDPMAQDKKMAEGDVGRPRRDAA	2656
rpsC_lf.cluster1852	3	Ga0577626_0283506_679_1377	Ga0577626_0283506	1	MGQKINPIGLRLGINRTWDSRWFAGKNEYGKLLHEDVKIREILHKELKQAAVARIVIERPHKKCRVTIHSARPGVVIGKKGADIDKLRKRVADITASDVVINIVEIRKPELDATLVAESIGQQLERRVAFRRAMKRAVQSAMRLGAEGIRINCSGRLGGAEIARMEWYREGRVPLHTLRADVDYGVATAFTTFGTCGVKVWIFKGEILEHDPMAQDKKMAEGDSSRPRRDAA	2059
rpsC_lf.cluster1853	21	soilwarming_unheated_45-60_052018_S4S9S14_15522_2	soilwarming_unheated_45-60_052018_S4S9S14_15522	1	MGQKVNPLGLRLGINRTWDSRWYSGKNEYSQLLHEDMKIRKELMKDLKQAAVSKIVIERPHKKCRVTVQSARPGVVIGKKGADIEKLRRKVTKLTKSDVVINIVEIRKPELDAQLVAESIAQQLERRVAFRRAMKRAVQSAMRLGAGGIRINCSGRLGGAEIARMEWYREGRVPLHTLRADVDYGVATAFTTYGTCGVKVWIFKGEIMEHDPMAQDKKMAEGEAGRPRRDVP	4494
rpsC_lf.cluster1854	2	Ga0577631_0304235_162_860	Ga0577631_0304235	1	MGQKINPIGLRLGINRTWDSRWYAGKNEYGKLLHEDVKIREILHKELKQAAVAKIIIERPHKKCRVTIHSARPGVVIGKKGADIDKLRKKVADITASDVVINIVEIRKPELDATLVAESIAQQLERRVAFRRAMKRAVQSAMRLGAEGIRINCSGRLGGAEIARMEWYREGRVPLHTLRADIDYGVATAFTTFGTCGVKVWIFKGEILEHDPMAQDKRMAEGDSSRPRRDAA	1268
rpsC_lf.cluster1855	13	Ga0577619_00015478_3402_4100	Ga0577619_00015478	1	MGQKVNPIGLRLGINRTWDSRWYSGKGEYGQLLHEDMKIRQELMKDLKQAAVSKIVIERPHKKCRVTVQSARPGVVIGKKGADIEKLRKKVTSLTKSDVVINIVEIRKPELDAQLVAESIAQQLERRVAFRRAMKRAVQSAMRLGAGGIRINCSGRLGGAEIARMEWYREGRVPLHTLRADVDYGVATAFTTYGTCGVKVWIFKGEIMEHDPMAQDKKLAEGETGRPRRDAS	10045
rpsC_lf.cluster1856	6	Ga0577640_0049355_1769_2467	Ga0577640_0049355	1	MGQKINPIGLRLGINRTWDSRWFAGKNEYGKLLHEDVKIREILHKELKQAAVARIVIERPHKKCRVTIHSARPGVVIGKKGADIDKLRKRVADITASDVVINIVEIRKPELDATLVAESIAQQLERRVAFRRAMKRAVQSAMRLGAEGIRINCSGRLGGAEIARMEWYREGRVPLHTLRADVDYGVATAFTTFGTCGVKVWIFKGEILEHDPMAQDKKMAEGDTARPRRDAA	3157
rpsC_lf.cluster1857	5	Ga0480452_0251724_507_1205	Ga0480452_0251724	1	LSVTKYFIKDVSRRLEIDELLQRDLKRAGYSRVELTKSPVGTRVVIYAAKPGMVIGRRGQSIKDLTKLLETKFGIENPQLSVATIEIPEQDPKVVASQVAQALQRGVHFRRAAYWAIQRVMESQALGVEIIIRGKLTTERSRFEKFRAGYLPRVGDPVLKSVKVAVTDVQLKQGLFGIKVRILPPTVDFIDKPTMKTPPPSVAATPAAQAPIVESAVVETEKEEPIGNTAQA	1277
rpsC_lf.cluster1858	2	Ga0577643_00603852_623_1321	Ga0577643_00603852	1	MGQKVNPIGLRLGINRTWDSRWYSGKDEYGQLLHEDMKIREELMKDLKQAAVSKIVIERPHKKCRVTVQSARPGVVIGKKGADIEKLRKKVTNLTKSDVVINIVEIRKPELDAQLVAESIAQQLERRVAFRRAMKRAVQSAMRLGAGGIRINCSGRLGGAEIARMEWYREGRVPLHTLRADVDYGVATAFTTYGTCGVKVWIFKGEIMEHDPMAQDKKLAEGEAGRPRRDAP	1422
rpsC_lf.cluster1859	1	Ga0577633_0195799_123_821	Ga0577633_0195799	1	MGQKVRPTGFRTGIMVDWGSHWYANKQDFSELLVEDFKIRKFIKHRYGGSGISKVRIQRTREKVTVFIHSARVGMIIGKKGAEIEKLTKQLEDLTHRHIEIKTIEVNRPEVDAQLVAQDIADQLAKRASFRRTMKRAMDTTMENGAKGIRIQLAGRLGGSEMARNEKTMTGSIPLSTLRAKVEYGFAESATAQGHIGVKVWINNGDYLEESSDASDAQAGKVPKKSTRQVKR	2372
rpsC_lf.cluster186	3	Ga0577639_0551549_116_1132	Ga0577639_0551549	1	LGHKVHPNGFRLGVYRPWEANWFAEDKDYTKLLHEDLEMRRVILKRLHNAGIAKIETERSSNAQMTVTIHTAKPGIVIGKGGASVDQLREDLEKRFGNRVRISIQEIKQPELDAQLVAENIASQIERRISHRRAMKQSILRTMRAGAKGVRIGMAGRLRGGEMARRESDHEGKVPLHTLRADIKFGRATARTTYGVIGVKVWIYKDLLKARTRGGQQPDELYPQPQAEGRQPAPERAGPATQAVPSGTHAEAPRVDPGAPAVASETVRQQVSAERGGSSQRRRSPRPEGGGAAQARPSGPRPAPRSGPEGQSSPPAPPRDQAAETPSQAEPGTPAVEEN	1132
rpsC_lf.cluster1860	1	Ga0480455_00574516_623_1321	Ga0480455_00574516	1	LSVTKYFIKDVSRRLEIDELLQRDLKRAGYSRVELTKSPVGTRVVIYAAKPGMVIGRRGQSIKDLTKLLETKFGIENPQLSVATIEIPEQDPKVVASQVAQALQRGVHFRRAAYWAIQRVMESQALGVEIIIRGKLTTERSRFEKFRAGYLPRVGDPVLKSVKVAVTDVQLKQGLFGIKVRILPPTVDFIDKPTMKTPPPSVAPSPAPTSPIVETAEVVTEKEEPIGNTAQA	1625
rpsC_lf.cluster1861	7	Ga0577623_0268787_868_1566	Ga0577623_0268787	1	MGQKINPIGLRLGINRTWDSRWFAGKAEYGKLLHEDVKIREILHKELKQAAVARIVIERPHKKCRVTIHSARPGVVIGTKGADIDKLRKKVADITASDVVINIVEIRKPELDATLVAESIAQQLERRVAFRRAMKRAVQSAMRLGAEGIRINCSGRLGGAEIARMEWYREGRVPLHTLRADIDYGVATAFTTFGTCGVKVWIFKGEILEHDPMAQDKKMAEGDNTRPRRDAA	1607
rpsC_lf.cluster1862	1	Ga0577633_0289935_744_1442	Ga0577633_0289935	1	MGQKVNPIGLRLGINRTWDSRWYSGKKEYGQLLHEDMKIRAELMKDLKQAAVSKIVIERPHKKCRVTVQSARPGVVIGKKGADIEKLRKKVMKLTQSDVVINIVEIRKPELDAQLVAESIAQQLERRVAFRRAMKRAVQSAMRLGAGGIRINCSGRLGGAEIARMEWYREGRVPLHTLRADVDYGVATAFTTYGTCGVKVWIFKGEIMEHDPMAQDKKMAEGEAGRPRRDAS	1909
rpsC_lf.cluster1863	1	Ga0577635_0327260_193_891	Ga0577635_0327260	1	MGQKVNPIGLRLGINRTWDSRWYAGKNEYGTLLHEDMKIRKELMTSLKQAAVSKIVIERPHKKCRVTVHSARPGVVIGKKGADIEKLRKSVAKLTDSDVVINIVEIRKPELDATLVAESIAQQLERRVAFRRAMKRAVQSAVRLGAQGIRINCSGRLGGAEIARMEWYREGRVPLHTLRADVDYGVATAFTTYGTCGVKVWIFKGEIMEHDSMAQDKRLAEAEAGRPSRREA	1363
rpsC_lf.cluster1864	3	Ga0480585_0104070_293_991	Ga0480585_0104070	1	MGQKIHPEGFRVGYIHDWKSNWYNEKEFADYLNEDLEIRSHIENKLSHAGLSKITIKKGSGEVEVDISTARPGIVIGKSGTEVDALRRELHKLTGKPVKVNIKEIKRPELDAKLVAQSIAEQLQNRVAFRRAMKRALTSAMRSGAKGVKVQVSGRLGGAEMARTQGYSDGRVPLHTLRADIDYGFIEAKTTTGRIGVKCWINKGEVMPEGFRSDKSDEDGAPPSGGGRGGRG	1528
rpsC_lf.cluster1865	1	Ga0577623_0094910_869_1567	Ga0577623_0094910	1	MGQKVNPIGLRLGINRTWDSRWYSGKNEYGQLLHEDMKIRAELMKDLKQAAVSKIVIERPHKKCRVTVQSARPGVVIGKKGADIEKLRRKVTSLTKSDVVINIVEIRKPELDAQLVAESIAQQLERRVAFRRAMKRAVQSAMRLGAGGIRINCSGRLGGAEIARMEWYREGRVPLHTLRADVDYGVATAFTTYGTCGVKVWIFKGEIMEHDPMAQDKKLAEGEAGRPRRDAP	2817
rpsC_lf.cluster1866	2	Ga0480460_011772_12_710	Ga0480460_011772	1	MGQKVNPIGLRLGINRTWDSRWYAGKASYGELLHEDMAIRKVLLAELKQAAVSKIVIERPHKKCRVTIQSARPGVVIGKKGADIEKLRRKVAALTDSDVVINIVEIRKPELDAQLVAESIAQQLERRVAFRRAMKRAVQSAMRLGAGGIRINCSGRLGGAEIARMEWYREGRVPLHTLRADVDYGVATAFTTYGTCGVKVWIFKGEIMEHDPMAQDKKMAEGDVGRPRRDAA	1454
rpsC_lf.cluster1867	1	Ga0506675_0328427_65_763	Ga0506675_0328427	1	MGQKVHPYGFRLGVIKTWNSKWFEDKSYAKWLHEDIRVKRAVKEYLQNAGIASVEIERAANKCKVIVFTARPGMVIGKGGKGIETLKSGNIKTATKGEVVFPGVQSFTENEVFIDVQEVRKAETAAQLVAENIATQLERRVAFRRAMKKALTTAMKFGAKGIRVRCSGRLGGSEMSRVETYREGRVPLHTLRADIEFGTAEARTKYGIIGVKVWVFKGEVLQRRNRRPQSIA	1129
rpsC_lf.cluster1868	1	Ga0480455_00091286_770_1468	Ga0480455_00091286	1	MGQKVHPYGFRLGVIKTWNSKWFEDKSYAKWLHEDIRVKRAVKEYLQNAGIASVEIERAANKCKVIVFTARPGMVIGKGGKGIETLKSGNVKTAAKGEVVFPGVQSFTENEVFIDVQEVRKAETAAQLVAENVATQLERRVAFRRAMKKALTTAMKFGAKGIRVRCSGRLGGSEMSRVETYREGRVPLHTLRADIEFGVAEARTKYGIIGVKVWVFKGEVLQRRNRRPQGLV	3998
rpsC_lf.cluster1869	2	Ga0480455_00123738_3_698	Ga0480455_00123738	1	MGQKVNPIGLRLGINRTWDSRWFARKEYGNLLLDDLGLRRFLQQRLGQAGLSRVVIERAAKRTRITLHSARPGVVIGKKGADIEKLRTDIAKLTKSEVSLNIVEIRKPEVEAKLIADSIAQQLERRVAFRRAMKRAVQSAMRLGAQGIRINCSGRLGGAEIARMEWYREGRVPLHTLRADVDFGYGTAKTTYGVCGVKVWVFKGEILAHDPMAQEKRMTEGQPAGHERGRRE	3477
rpsC_lf.cluster187	9	Ga0577618_0255299_1017_2033	Ga0577618_0255299	1	LGHKVHPNAFRLGVFRPWEANWFANPKDYTKMLHEDLEMRGAILARLRNAGIAKIETERSSNAQLTVTIHTAKPGIVIGKGGSSVDQLREDLEKRFGNRVRISIQEIKQPELNAQLVAENIASQIERRISYKRAMKQAILRTMRAGAKGVRIYCGGRLRGAEMARREWDREGRVPLHTLRADIDFGRATAKTTFGAIGVKCWIYKDQISPKARLPITDGAPIGDAIAPQPEAPVDVAPQPVAVVETAPAEVVTAPVVAEVAAPEAAPKRARAAVPAARPKAEAATVSKPAPKSPAKPAVKTPAKPAVKAAAKVTAPKAEKAPAPKKAPAKKATEKKAK	2085
rpsC_lf.cluster1870	1	Ga0577626_0929930_324_1019	Ga0577626_0929930	1	MGQKVHPESMRVGYIHDWKSNWFNERHFSDYLFEDVAIRGHIVGKLSHAGLSDITIRKDANEVEVNIHTARPGIVIGKSGSEVDALRKELHRMTRKQIKVNILEIKRPELDAKLVAQSIAEQLQNRVAFRRAMKRALTSAMRSGAKGCKVQVSGRLGGAEMARTESYSDGRVPLHTMRADIDYGFHEARTTFGRIGVKCWINKGEIMPAGYTGADLTEMEAPQQQSQDRGDG	1021
rpsC_lf.cluster1871	7	Ga0577625_0102345_1123_1821	Ga0577625_0102345	1	MGQKVNPIGLRLGINRTWDSRWYSGKNEYGELLHEDMKIRAALMKDLKQAAVSKIVIERPHKKCRVTVQSARPGVVIGKKGADIEKLRKKVMKLTKSDVVINIVEIRKPELDAQLVAESIAQQLERRVAFRRAMKRAVQSAMRLGAGGIRINCSGRLGGAEIARMEWYREGRVPLHTLRADVDYGVATAFTTYGTCGVKVWIFKGEIMEHDPMAQDKKMAEGEAGRPRRDAP	2905
rpsC_lf.cluster1872	1	Ga0577615_0668239_120_818	Ga0577615_0668239	1	VGQKVHPFGFRLGFNKTWRSRWYSDRDYAKLLHEDLNLRSSLKKRFAHAGVSKIETERAANKLKIDIYTSRPGIIIGRKGTEVDKLKQEIQKRTNREVFINIQEIQKPELDAQLISESVAMQLEKRVAFRRAMRKAVESALRFGARGIKVRVSGRLNGAEIARSEWYLHGQLPLQTLRADIDYGFAEASTTYGQIGIKVWLYKGERLVPLRGREEEFRERAPRRPAAGGGRG	1128
rpsC_lf.cluster1873	2	Ga0577625_0001427_24384_25082	Ga0577625_0001427	1	MGQKINPIGLRLGINRTWDSRWYAGKNEYGKLLHEDVEIRKILMKELKQAAVARIVIERPHKKCRVTIHSARPGVVIGKKGADIDKLRKRVADITASDVVINIVEIRKPELDATLVAESIAQQLERRVAFRRAMKRAVQSAMRLGAEGIRINCSGRLGGAEIARMEWYREGRVPLHTLRADVDYGVATAFTTFGTCGVKVWIFKGEILEHDPMAQDKRMAEGDSGRPRRDAA	26415
rpsC_lf.cluster1874	7	Ga0480452_0226197_597_1295	Ga0480452_0226197	1	MGQKINPIGLRLGINRTWDSRWFAGKSEYGKLLHEDVKIREILHKELKQAAVARIVIERPHKKCRVTIHSARPGVVIGKKGADIDKLRKKVADITASDVVINIVEIRKPELDATLVAESIAQQLERRVAFRRAMKRAVQSAMRLGAEGIRINCSGRLGGAEIARMEWYREGRVPLHTLRADIDYGVATAFTTFGTCGVKVWIFKGEILEHDPMAQDKKMAEGDTARPRRDAA	1351
rpsC_lf.cluster1875	1	soilwarming_2_unheated_60-80_052018_S10_911_13	soilwarming_2_unheated_60-80_052018_S10_911	1	MGQKVNPIGLRLGINRTWDSRWFAGKNDYGKLLHEDMEIRKELMKALKQAAVSKIVIERPHKKCRVTIHSARPGVVIGKKGADIEKLRKTVARLTDSDVVINIVEIRKPELDATLVAESIAQQLERRVAFRRAMKRAVQSAMRLGAEGIRINCSGRLGGAEIARMEWYREGRVPLHTLRADVDYGFATAFTTYGTCGVKVWIFKGEIMEHDPMAQDKKMAEADAGRPPRHAA	5604
rpsC_lf.cluster1876	1	Ga0577630_0034229_1121_1819	Ga0577630_0034229	1	MGQKVNPIGLRLGINRTWDSRWYAGKASYGTLLHEDMEIRKALMKELKQAAVSKIVIERPHKKCRVTIHSARPGVVIGKKGADIEKLRRKVAELTDSDVVINIIEIRKPELDAQLVAESIAQQLERRVAFRRAMKRAVQSAMRLGAGGIRINCSGRLGGAEIARLEWYREGRVPLHTLRADVDYGVATAFTTYGTCGVKVWIFKGEIMEHDPMAQDKKMAEGDVGRPRRDAA	3940
rpsC_lf.cluster1877	12	Ga0577619_00358104_483_1181	Ga0577619_00358104	1	MGQKVNPIGLRLGINRTWDSRWYAGKNEYGKLLHEDMEIREELLKSLKQAAVSKIVIERPHKKCRVTIHSARPGVVIGKKGADIEKLRKKVADLTDSDVVINIIEIRKPELDAQLVAESIAQQLERRVAFRRAMKRAVQSAMRLGAEGIRINCSGRLGGAEIARMEWYREGRVPLHTLRADVDYGVATAFTTYGTCGVKVWIFKGEILEHDPMAQDKKLAESESGRPRRDAA	2387
rpsC_lf.cluster1878	2	Ga0577621_0138346_855_1553	Ga0577621_0138346	1	LSVTKYFIKDVSRRLEIDELLQRDLKRAGYSRVELTKSPVGTRVVIYAAKPGMVIGRRGQSIKDLTKLLETKVGIENPQLSVATIEIPEQDPKVVASQVAQALQRGVHFRRAAYWAIQRVMESQALGVEIIIRGKLTTERSRFEKFRAGYLPRVGDPVLKSVKVAVTDVQLKQGLFGIKVRILPPTVDFIDKPTMKTPPPSVAPTLTVQPPTVESAVVETEKEEPIGNTAQA	1958
rpsC_lf.cluster1879	4	Ga0480587_0054862_109_807	Ga0480587_0054862	1	MGQKINPIGLRLGINRTWDSRWYAGKNEYGKLLHEDVKIREILHKELKQAAVARIVIERPHKKCRVTIHSARPGVVIGKKGADIDKLRKRVAEITASDVVINIVEIRKPELDATLVAESIAQQLERRVAFRRAMKRAVQSAMRLGAEGIRINCSGRLGGAEIARMEWYREGRVPLHTLRADVDYGVATAFTTFGTCGVKVWIFKGEILEHDPMAQDKKMAEGDSGRPRRDAA	1369
rpsC_lf.cluster188	17	soilwarming_2_heated_50-60_052016_S44_3573_3	soilwarming_2_heated_50-60_052016_S44_3573	1	MGHKVHPNAFRLGVFRPWEANWFANPKDYTKMLHEDLEMRGAILARLRNAGIAKIETERSSNAQLTVTIHTAKPGIVIGKGGSSVDQLREDLEKRFGNRVRISIQEIKQPELNAQLVAENIASQIERRISYKRAMKQAILRTMRAGAKGVRIYCGGRLRGAEMARREWDREGRVPLHTLRADIDFGRATAKTTFGAIGVKCWIYKDQISPKARLPITDGAPIGDAIAPQPEAPVDVAPQPVAVVESAPAEVVTAPVVAEVAAPEAAPKRARAAAPAAKPKAEAATVSRPAPKSPAKPAVKTQAKPAAKAAAKATAPKAEKAPAPKKAPAKKATEKKAK	3403
rpsC_lf.cluster1880	2	Ga0577624_0028658_3_701	Ga0577624_0028658	1	LSVTKYFIKDVSRRLEIDELLQRDLKRAGYSRVELTKSPVGTRVVIYAAKPGMVIGRRGQSIKDLTKLLETKFGIENPQLSVATIEIPEQDPKVVASQVAQALQRGVHFRRAAYWAIQRVMESQALGVEIIIRGKLTTERSRFEKFRAGYLPRVGDPVLKSVKVAVADVQLKQGLFGIKVRILPPTVDFIDKPTMKTPPPSVAPTSAVQPPVAENVEVETEKGEPIGNPAQA	5608
rpsC_lf.cluster1881	1	soilwarming_2_heated_60-80_052018_S25_18174_2	soilwarming_2_heated_60-80_052018_S25_18174	1	MSVTKYFIKDVSRRLEIDELLQRDLKRAGYSRVELTKSPVGTRVVIYAAKPGMVIGRRGQSIKDLTKLLETKFGIENPQLSVATIEIPEQDPKVVASQIAQALQRGVHFRRAAYWAIQRVMESQALGVEIIIRGKLTTERSRFEKFRAGYLPRVGDPVLKSVKVAVTDVQLKQGLFGIKVRILPPTVDFIDKPTMKTPPPSVAPTPLVQAPTVDSAVVETEKEEPIGNTAQA	1985
rpsC_lf.cluster1882	12	Ga0577630_0160002_1079_1777	Ga0577630_0160002	1	MGQKINPIGLRLGINRTWDSRWFAGKNEYGKLLHEDVKIREILHKELKQAAVARIVIERPHKKCRVTIHSARPGVVIGKKGADIDKLRKRVAEITDSDVVINIVEIRKPELDATLVAESIAQQLERRVAFRRAMKRAVQSAMRLGAEGIRINCSGRLGGAEIARMEWYREGRVPLHTLRADVDYGVATAFTTFGTCGVKVWIFKGEILEHDPMAQDKKMAEGDSSRPRRDAA	1908
rpsC_lf.cluster1883	6	Ga0577636_0357744_2_700	Ga0577636_0357744	1	MGQKVNPIGLRLGINRTWDSRWYSGKNEYGLLLHEDMKIRAELMKDLKQAAVSKIVIERPHKKCRVTFQSARPGVVIGKKGADIEKLRKKVARLTKSDVVINIVEIRKPELDAQLVAESIAQQLERRVAFRRAMKRAVQSAMRLGAGGIRINCSGRLGGAEIARMEWYREGRVPLHTLRADIDYGVATAFTTYGTCGVKVWIFKGEIMEHDPMAQDKKMAEGEAGRPRREPA	1054
rpsC_lf.cluster1884	2	Ga0480584_0070309_539_1237	Ga0480584_0070309	1	MGQKVNPVGLRLGINRTWDSRWYAGKASYGTLLHEDMEIRKALMKELKQAAVSKIVIERPHKKCRVTIHSARPGVVIGKKGADIEKLRRKVAALTDSDVVINIVEIRKPELDAQLVAESIAQQLERRVAFRRAMKRAVQSAMRLGAGGIRINCAGRLGGAEIARMEWYREGRVPLHTLRADVDYGVATAFTTYGTCGVKVWIFKGEIMEHDPMAQDKKMAEGEAGRPRRDAA	2022
rpsC_lf.cluster1885	2	Ga0577626_0369923_652_1350	Ga0577626_0369923	1	MGQKVNPLGFRIGITEDWKSRWYATKQAYGEFLGEDYRLRKFIDKKLNRRPPFAAVSDILIERTREEVRITLRTARPGLVIGPKGAEVDKLREEIEDLIKRKVGPITVIEVKNPDLNAQLVAEAIAEQLKKRASFRRVLKQRAEATMQAGAKGIKMVVSGRLGGAEIARSEQSVTGSIPLTTLQANVDYGYAIAFTTYGTIGIKTWIFRGMYGEEVLETDVRPGGPQRRGRR	1771
rpsC_lf.cluster1886	6	Ga0577619_00000600_1907_2605	Ga0577619_00000600	1	MGQKVNPVGLRLGINRTWDSRWYAGKTSYGSLLHEDMKIRAALMKELKQAAVSKIVIERPHKKCRVTIHSARPGVVIGKKGADIEKLRRKVAALTDSDVVINIVEIRKPELDAQLVAESIAQQLERRVAFRRAMKRAVQSAMRLGAGGIRINCSGRLGGAEIARMEWYREGRVPLHTLRADVDYGVATAFTTYGTCGVKVWIFKGEIMEHDPMAQDKRMAEGEAGRPRRDAA	35757
rpsC_lf.cluster1887	1	Ga0577643_00728394_114_812	Ga0577643_00728394	1	LSVTKYFIKDVSRRLEIDELLQRDLKRAGYSRVELTKSPVGTRVVIYAAKPGMVIGRRGQSIKDLTKLLETKFGIENPQLSVATIEIPEQDPKVVASQVAQALQRGVHFRRAAYWAIQRVMESQALGVEIIIRGKLTTERSRFEKFRAGYLPRVGDPVLKSVKVAVTDVQLKQGLFGIKVRILPPTVDFIDKPTMKTPPPNVSPAPTVQAPTVESAVVETEKEEPIGNTAQA	1284
rpsC_lf.cluster1888	9	Ga0577638_0515979_1070_1768	Ga0577638_0515979	1	MGQKINPIGLRLGINRTWDSRWFAGKNEYGKLLHEDVRIRELLHKELKQAAVARIVIERPHKKCRVTIHSARPGVVIGKKGADIDKLRKQVADITASDVVINIVEIRKPELDATLVAESIAQQLERRVAFRRAMKRAVQSAMRLGAEGIRINCSGRLGGAEIARMEWYREGRVPLHTLRADIDYGVATAFTTFGTCGVKVWIFKGEILEHDPMAQDKKMAEGDNSRPRRDAA	1773
rpsC_lf.cluster1889	1	Ga0480455_00119921_2807_3505	Ga0480455_00119921	1	MGQKINPIGLRLGINRTWDSRWFAGKSEYGKLLHEDVKIREVLHKELKQAAVARIVIERPHKKCRVTIHSARPGVVIGKKGADIDKLRKRVADITASDVVINIVEIRKPELDATLVAESIAQQLERRVAFRRAMKRAVQSAMRLGAEGIRINCSGRLGGAEIARMEWYREGRVPLHTLRADIDYGVATAFTTFGTCGVKVWIFKGEILEHDPMAQDKKMAEGDTSRPRRDAA	3528
rpsC_lf.cluster189	4	Ga0577626_0010692_6054_7070	Ga0577626_0010692	1	MGQKIHPEGFRVGYIHDWKSNWFDERNFADLLLEDIAIREHIENKLSHAGLSDITIVKQRGEIAVDIHTARPGIVIGKSGAEVDALRRDLHKITGKPVKVNIREIKRPELDAKLVAQSIAEQLQNRVAFRRAMKRALTSAMRSGAKGVKVQVSGRLGGAEMARTEGYSDGRVPLHTLRADIDYGFVEAKTTTGRIGVKCWINKGEVMPEGFRAGAEEEELAPRSFRRRGGERPGGQRGGQRGGQGGGQRGGQGGGQRGGQSRPPQAAPAAPAAPATPAAAPPAATPAAPAAAPPVPAAVPRAVPSHPQAVPPDAPTPAPTLAPTEAPATPAPEKGGDA	11019
rpsC_lf.cluster1890	2	Ga0577615_0112586_318_1013	Ga0577615_0112586	1	LWWQTPPKELQLGQKVHPIGFRLGIIKTWDSKWYEEKNYAKWLHEDIHIREFVKKTLGHAGVSKVEIERAANKVKVNVHTARPGIVIGKRGAGIETIKKDLQRFTKNEIFLNIVEVRKAEIDAQLVSENIATQLERRIAFRRAMKKAIQTGMKFGAKGIRVACSGRLGGAEMARYEWYREGRVPLHTLRADIDYGVAVAKTTYGTIGCKVWICRGEVLPPKAGQSAREGAR	2915
rpsC_lf.cluster1891	8	soilwarming_3_unheated_0-10_052018_S11_109_23	soilwarming_3_unheated_0-10_052018_S11_109	1	MGQKSNPIGLRLQINRTWDSRWYADGDDYGRLLLEDLKIRKYIMKALPQAAISKVVIERPAKLCRVSIYAARPGVIIGKKGADIEKLRKKLGEMTSSDVSLNIVEIRKPEIDSRLVAQGVADQLERRIAFRRAMKRAVQSALRLGAEGIRITCAGRLGGAEIARTEWYREGRVPLHTLRGNVDYAEATAHTAYGVCGVKVWIFKGEILGHDPLAQDRLMMEAQTSGVRPAR	25868
rpsC_lf.cluster1892	20	Ga0577622_0441294_275_970	Ga0577622_0441294	1	MGQKVNPTGLRLGINRTWDSRWYAGKNEYGKLLHEDMEIRAALTKQLKQAAVSKIVIERPHKKCRVTIHSARPGVVIGKKGADIEKLRKAVAKLTDSDVVLNIIEIRKPELDARLVAESIAQQLERRVAFRRAMKRAVQSAMRLGAEGIRINCSGRLGGAEIARLEWYREGRVPLHTLRADVDYGVATAFTTYGTCGVKVWIFKGEILEHDPMAQDKRMAESEQGRPHRDR	1075
rpsC_lf.cluster1893	3	Ga0577641_0357933_417_1112	Ga0577641_0357933	1	MGQKVNPIGFRLGVNRDWRSRWYASPQEMPEFLHSDIEIRDYVKKKLQYAAVSKIVIERAWNSIRVTIFTARPGIVIGRKGAEIEKMTEEISKMAQGKQIKIDIQEIKTPELDAQLVAENVALQIERRIAYRRAMKKAVQVAMDFGALGIRLRSSGRLNGAEISRSEWYREGKVPLHTLRTGIDYGFAEANTVYGKIGVKCWICKKEEAPAETPAQASPPLPPPEPAATEL	1480
rpsC_lf.cluster1894	1	Ga0480587_0091633_188_883	Ga0480587_0091633	1	MGQKVNPIGLRLGINRTWDSRWYAGKSEYGKLLHEDMKIREALQEALKQAAVSKIVIERPHKKCRVTIHSARPGVVIGKKGADIEKLRKQVAALTASDVVINIIEIRKPELDAQLVAESISQQLERRVAFRRAMKRAVQSAMRLGAGGIRINCSGRLGGAEIARMEWYREGRVPLHTLRADVDYGVATAFTTYGTCGVKVWIFKGEIMEHDPMAQDKKLAEGDVGRPRRDA	1093
rpsC_lf.cluster1895	1	Ga0577625_0074962_1701_2396	Ga0577625_0074962	1	VGQKVHPFGFRLGFNKTWRSRWYSDKDYAKLLHEDLALRTNLKKRFAHAGVSKIETERAANKLKIDIYTSRPGIIIGRKGTEVDKLKQEIQKRTSREVFINIQEIQKPELDAQLISESVALQLEKRVAFRRAMRKAVESALRFGARGIKVRVSGRLNGAEIARSEWYLHGQLPLQTLRADIDYGFAEANTTYGKIGIKVWLFKGERLVPLRGREEEYRERAPRRPQGPDRR	3403
rpsC_lf.cluster1896	5	Ga0577619_00003260_15596_16291	Ga0577619_00003260	1	VGQKVHPYGFRLGFNKTWRSRWFADRDYAKILHEDLALRADLKKRFAHAGVSKIETERAANRLKIDIHTSRPGIIIGRKGTEVEKLKAEIQKRTNREVFINIQEIQKPELDAQLIAESVAMQLEKRVAFRRAMRKAVESALRFGARGIKVRVSGRLNGAEIARSEWYLHGQLPLQTLRADIDYGFAEASTTYGQIGVKTWLYKGERLTPKTAREEEFRERAPRRPAGREAR	18807
rpsC_lf.cluster1897	1	Ga0577639_0673409_104_799	Ga0577639_0673409	1	MGQKVNPIGFRLGVNRDWRSRWYASPQELPAFLHSDLEIRAYVKKKLQFAAVSKIVIERAWNSIRVTIHTARPGIVIGRKGAEIEKMTEEISKMAQGKQIKIDIQEIKTPELDAQLVAENVSLQIERRIAYRRAMKKAVQVAMDFGAEGIRLRCSGRLNGAEISRSEWYREGKVPLHTLRTPIDYGFAEANTVYGKIGVKCWMCKKEEAPSDAPVAMAPPPPPPPAEPVQA	1019
rpsC_lf.cluster1898	3	Ga0577625_0043185_3343_4038	Ga0577625_0043185	1	VGQKVHPYGFRLGFNKTWRSRWYSDRDYAKLLHEDLALRQDLKKRFSHAGVSRIETERAANKLKIDIYTSRPGIIIGRKGTEVDKLKQEIQKRTNREVFINIQEIQKPELEAQLIGESVAVQLEKRVAFRRAMRKAVESALRFGARGIKVRVSGRLNGAEIARSEWYLHGQLPLQTLRADIDYGFAEANTTYGQIGVKVWLYKGERLVPRLGRDEEYRDRGPRRPAAGERR	4500
rpsC_lf.cluster1899	1	Ga0480455_00040622_1302_1997	Ga0480455_00040622	1	MGQKVNPIGFRLGVNRDWRSRWYASPQELPAFLHSDLEIRAYVKKKLQFAAVAKIVIERAWNSIRVTIHTARPGIVIGRKGAEIEKMTEEISKMAQGKQIKIDIQEIKTPELDAQLVAENVSLQIERRIAYRRAMKKAVQTAMDFGAEGIRLRCSGRLNGAEISRSEWYREGKVPLHTLRTPIDYGFAEANTVYGKIGVKCWICKKEEAPSEPPMAAAPPPPPPPTEPVEA	5710
rpsC_lf.cluster19	19	Ga0577627_0200145_939_2114	Ga0577627_0200145	1	MGQKIHPGGLRVGVIHDWKSNWMVGKKEFAGALIEDIKIREHILKKLSHAGLSDILIRKDKQRITIDIYTARPGIVIGKSGVEVDALRKEVHAMTQKNVHININEIKRPELDAKLVAQSIAEQLQNRVSFRRAMKRSLASAIRSGAAGVKVQCSGRLGGSEMSRSEQYSEGRVPLHTIRADIDYGFVEAKTPTGRIGVKVWINKGEIMPQGYSGMAEKKETRLGDQDTARRRGGVTEGLGASRESGRNRNQDREGLGPVRRGRPGQRGGTQRPGGGGAGNRPGAPRSRGGATQRPAGGRERPATDQAVGGKDAPADNAVELPRTDAAGVSAEGREQPVIEPTVETTPAPVADAPDTTTTKKQVEDPTKLEDSGSKDAPKKKAAPRKKKADS	2435
rpsC_lf.cluster190	3	soilwarming_2_heated_45-60_052018_S24_13331_1	soilwarming_2_heated_45-60_052018_S24_13331	1	MGHKVHPNAFRLGVFRPWEANWFANPKDYTKMLHEDLEMRGAILARLRNAGIAKIETERSSNAQLTVTIHTAKPGIVIGKGGSSVDQLREDLEKRFGNRVRISIQEIKQPELNAQLVAENIASQIERRISYKRAMKQAILRTMRAGAKGVRIYCGGRLRGAEMARREWDREGRVPLHTLRADIDFGRATAKTTFGAIGVKCWIYKDQISPKARLPITDGAPIGDAIAPQPEAPVDVAPQPVAVVESAPAEVVTAPVVAEVAAPEAAPKRARAAAPAAKPKAEAVTVSKPAPKSPAKPAVKTPAKPAAKAAPKATALKAEKAPAPKKAPAKKATEKKAK	1244
rpsC_lf.cluster1900	1	Ga0577639_0392998_559_1254	Ga0577639_0392998	1	MGNKSNPIGLRLQINRTWDSRWFAEGDDYGRLLLEDLKIRKYIMKALPQAAISKVVIERPAKLCRVSIYAARPGVIIGKKGADIEKLRSKLGTMTSSAVSLNIVEIRKPEIDSRLVAQGVADQLERRIAFRRAMKRAVQSALRLGAEGIRITCAGRLGGAEIARTEWYREGRVPLHTLRANVDYAEATAHTAYGVCGVKVWIFKGEILGHDPLSQDRLMMEAQTSGVRPAR	1346
rpsC_lf.cluster1901	1	Ga0577630_0134586_257_952	Ga0577630_0134586	1	MGNKSNPIGLRLQINRTWDSRWFAEGDDYGRLLLEDLKIRKYIMKTLPQAAISKVVIERPAKLCRISIYAARPGVIIGKKGADIEKLRSKLGTMTSSAVSLNIVEIRKPEIDSRLVAQGVADQLERRIAFRRAMKRAVQSALRLGAEGIRITCAGRLGGAEIARTEWYREGRVPLHTLRANVDYAEATAHTAYGVCGVKVWIFKGEILGHDPLSQDRLMMDAQTSGVRPAR	2074
rpsC_lf.cluster1902	2	Ga0480585_0167261_13_708	Ga0480585_0167261	1	MGQKVNPIGLRLGINRTWDSRWYSGKNDYGKLLHEDMKIREDLSEALKQAAVSKIVIERPHKKCRVTIHSARPGVVIGKKGADIEKLRKMVAKLTDSDVVINILEIRKPELDAQLVAESISQQLERRVAFRRAMKRAVQSAMRLGAEGIRINCSGRLGGAEIARMEWYREGRVPLHTLRADVDFGVATAFTTYGTCGVKVWIFKGEIMEHDPMAQDKKMAEGDAGRPRRDS	1216
rpsC_lf.cluster1903	1	Ga0480584_0031697_259_954	Ga0480584_0031697	1	MGQKVNPIGLRLGINRTWDSRWYAGKTEYGLLLHEDVAIRKELHQQLKQAAVSRIVIERPHKKCRVTIQSARPGVVIGKKGADIEKLRKRVAALTDSDVVINIVEIRKPELDAQLVAESIAQQLERRVAFRRAMKRAVQSAMRLGAEGIRINCSGRLGGAEIARMEWYREGRVPLHTLRADVDYGVATAFTTYGTCGVKVWIFKGEILEHDPMAQDKKFAEAEAGRPRRDG	2998
rpsC_lf.cluster1904	2	Ga0577639_0094130_456_1151	Ga0577639_0094130	1	MGQKVNPIGFRLGVNRDWRSRWYASPQEMPEFLHSDIQIRDYVKKKLQFAAVSKIVIERAWNSIRVTIFTARPGIVIGRKGAEIEKMTEEISKMAQGKQIKIDIQEIKTPELDAQLVAENVALQIERRIAYRRAMKKAVQVAMDFGALGIRLRSSGRLNGAEISRSEWYREGKVPLHTLRTGIDYGFAEANTVYGKIGVKCWICKKEEASAETPAQASPPPPPPEPAATAL	2616
rpsC_lf.cluster1905	4	soilwarming_2_unheated_80-90_052016_S36_22154_2	soilwarming_2_unheated_80-90_052016_S36_22154	1	MGQKVHPYGFRLGYTKPWKSRWFVVRDYDKLLLEDVKLKAELKEKLKSAGVSSVEIERPGNKLRIIIKTARPGIIIGRKGAEIDKLKQDVQKRLRSEGSQREVHVDIQEVHKPELDAQLVSESIALQLEKRVGFRRAMRKSVDSALRFGCKGIKVRVSGRLNGNEIARSEWYLQGRLPLHTLRADIDYGFTEARTTYGVIGVKCWVYKGEILPAKKREATPAREVTTTGAF	1120
rpsC_lf.cluster1906	1	Ga0577635_0402860_1_693	Ga0577635_0402860	1	MGQKVNPYGFRLGVTTDWKSRWFADRKEYRDYVIEDWRIRNYLMTQLPHAAISRIEVERTRDRLRVDVHTARPGIVIGRRGSEADRLRAGLTKITGNNKVQLNIQEIKQPELDAALIAQGVADQLAGRVAFRRAMKRAVQNAQKAGALGIRVQCSGRLGGAEMSRTEWYREGRVPLHTLRADIDYGFREARTTAGRIGVKVWLYKGDILPYKTAVEDKITREAAMAVGETS	1226
rpsC_lf.cluster1907	3	Ga0577617_0642107_394_1089	Ga0577617_0642107	1	KTWNAKWFANKKNYPVLLKEDIGIRNAIRGRLRDAAIARIDIERSANQVTVTIQTAKPGVVIGKGGAKVEELRQVLGKMTGKMVKVNIFEIRYPELDAYLIAENVAQQLERRVSFRKVLKQTVQRSMKSGAKGVRVAVSGRLGGAEMSRREWEREGRVPLHTLRGDIEFGRATAKTTYGTIGVKAWVYKGEIEPTPRQVTQTSAPAAAVQRPPAPPAPAPAAPVPQPARVS	1090
rpsC_lf.cluster1908	9	Ga0480449_0003446_1211_1906	Ga0480449_0003446	1	MGQKVNPISLRLGINRTWDSRWYAGKNEYGKLLHEDMEIRDALTKQLKQAAVSKIVIERPHKKCRVTIHSARPGVVIGKKGADIEKLRKEVAKLTDSDVVLNIIEIRKPELDARLVAESIAQQLERRVAFRRAMKRAVQSAMRLGAEGIRINCSGRLGGAEIARLEWYREGRVPLHTLRADVDYGVATAFTTYGTCGVKVWIFKGEILEHDPMAQDKRMAESEQGRPHRDR	9923
rpsC_lf.cluster1909	1	Ga0577626_0568839_682_1374	Ga0577626_0568839	1	MGQKIHPGGLRVGVIHDWKSNWYTGKKEFPQYILEDVRIREHIYKKLAHAGLSDILIRKDKQRITVDIYTARPGIVIGKSGVEVDALRKELHAMTQKNVHININEIKRPELDAKLVAQSIAEQLSNRVAFRRAMKRALASAIRSGAAGVKIQCSGRLGGGEMSRRETYNEGRVPLHTIRADIDYGFVEARTSSGRIGVKVWINKGEIMPEGFESITSGGEVRLGDQDARRR	1376
rpsC_lf.cluster191	2	Ga0577621_0430182_3_1016	Ga0577621_0430182	1	VGHKVHPNAFRLGPFRSWEANWFATEKDYTKLLHEDLDMRRLILSRLRNAGIARIETERSSNAQMTVTIHTAKPGIVIGKGGASVDQLREDLEKRFGNRVRISIQEIKQPELDAQLVAENIASQIERRISHRRAMKQSILRTMRAGAKGVRIGMAGRLRGGEMARRESDHEGKVPLHTLRADIKFGRATARTTYGVIGVKVWIYKDLMKSRTRGGQQQEDLYPQPQSEGRQPAPERTGATAQAIPSGTHAEAPAVDPAAPAVAGGTVRQQVADERGGGGQRRRSPRPEGQGSSARPGGPRPAPRRPAESPPSAPPSAAPQDQSTESGGPAEPGAPAVQ	1065
rpsC_lf.cluster1910	1	Ga0480478_003939_1_693	Ga0480478_003939	1	VGQKVNPHGFRLGITTDFKSRWYPDKHNLYKDYIAEDVAIRRMLQRGMERAGISKVEIERTRDRVRVDIHTARPGIVIGRRGAEADRIRGDLEKLTNKQIQLNILEVKNPEIDAQLVAQGVAEQLSSRVSFRRAMRKAMQTAMKGGAKGIRVQCSGRLGGAEMSRSEFYREGRVPLHTLRADIDYGFYEARTTFGRIGVKVWIYRGEAAQTRAERGGRGLALRAGQRPGRD	4396
rpsC_lf.cluster1911	3	Ga0577625_0004074_14228_14923	Ga0577625_0004074	1	VGQKVHPFGFRLGFNKTWRSRWYSDRDYATLLHEDLNLRQTLKKRFAHAGVSKIETERAANNLKIDIYTSRPGIIIGRKGTEVDKLKQEIQKRTNRQVFINIQEIQKPELDAQLISESVAMQLEKRVAFRRAMRKAVESALRFGARGIKVRVSGRLNGAEIARSEWYLHGQLPLQTLRADIDYGFAEANTTYGQIGIKVWLYKGERLVPLRGREEEYRERAPRRPAAGDRR	15685
rpsC_lf.cluster1912	2	soilwarming_1_heated_10-20_052016_S40_1768_6	soilwarming_1_heated_10-20_052016_S40_1768	1	MGQKSNPIGLRLQINRTWDSRWYADGGDYGRLLLEDLKIRKFILKTLPQAAISKVVIERPAKLCRVSIYAARPGVIIGKKGADIEKLRKQLGSMTSSDVSLNIVEIRKPEIDSRLVAQGVADQLERRIAFRRAMKRAVQSALRLGAEGIRITCSGRLGGAEIARTEWYREGRVPLHTLRANVDYAEATAHTAYGVCGVKVWIFKGEILGHDPLAQDRLMMEAQTSGVRPAR	2679
rpsC_lf.cluster1913	2	Ga0577625_0321694_139_834	Ga0577625_0321694	1	MGQKSNPIGLRLQINRTWDSRWFAEGADYGRLLLEDLKIRKYILKALPQAAISKVVIERPAKLCRISIYAARPGVIIGKKGADIEKLRKQLGTMTTSDVSLNIVEIRKPEIDSRLVAQGVADQLERRIAFRRAMKRAVQSALRLGAEGIRITCSGRLGGAEIARTEWYREGRVPLHTLRANVDYAEATAHTAYGVCGVKVWIFKGEILGHDPLAQDRLMMEAQTSGVRPAR	1604
rpsC_lf.cluster1914	1	Ga0480455_01250037_2_697	Ga0480455_01250037	1	IHTARPGIVIGRRGAEADRIRGDLEKLTKKQIQLNILEVKNPETDAQLVAQGVAEQLSSRVSFRRAMRKAMQSAMKGGAKGIRVQCSGRLGGAEMSRSEFYREGRVPLHTLRADIDYGFYEARTTFGRIGVKVWIYRGEAAQTRAEREAVQAALRAGQRRERPQQRRRAGTGPSADRPGRPDRPGRPERAAEAPAEAMAGDYRPSGSGVSPGGTVSSGASTAGVGAAGGEG	1062
rpsC_lf.cluster1915	1	Ga0480455_00958901_1_696	Ga0480455_00958901	1	IGKSGSEVDALRRDLHRMTKKQIKVNILEIKRPELDAKLVAQSIAEQLQNRVAFRRAMKRALTSAMRSGAKGVKVQVAGRLGGAEMARTESYSDGRVPLHTMRADIDYGFFEARTTFGRIGVKCWVNKGEIMPEGYTGTDLTDMTAPAAPSSERDGRGGREGRDGRGRGRGGGGPGGGGGRGRGSDGPGGSGRGAGGFGGAGGRGNGGRGPGGGGRGSRQAGGGPPGGGGR	1233
rpsC_lf.cluster1916	1	Ga0577624_0634688_379_1074	Ga0577624_0634688	1	TKREVFIDIQEVHKPELDAQLVAESIALQLEKRVAFRRAMRKAVDSALRFGCKGIKVRVSGRLNGAEIARSEWYLQGQLPLHTLRADLDYGFSEARTTYGVIGVKTWVYKGEILDSTGRKTGLKNDPEPRRAPRGDRDRDRDRRDRRGPGGGPGSGQGQPAGGFGTQAPAAGSHPPAEHVGGAQQQAPGELPQPARSTTPIAPPLSSPQPSWKQELKSEVPPATEPNKGSE	1076
rpsC_lf.cluster1917	1	Ga0577625_0305738_464_1159	Ga0577625_0305738	1	MGQKSNPIGMRLQINRTWDSRWYAEGADYGRLLLEDLKIRDFVMKTIPQAAISKVVIERPAKLCRVSIYAARPGVIIGKKGADIEKLRKQLGSMTSSDVSLNIVEIRKPEIDSRLVAQSVADQLERRIAFRRAMKRAVQSALRLGAEGIRITCGGRLGGAEIARTEWYREGRVPLHTLRANVDYAEATAHTAYGVCGVKVWIFKGEILGHDPLAQDRLMMDAQTSGVRPAR	1647
rpsC_lf.cluster1918	1	soilwarming_heated_10-20_052016_S40S43S46_119956_2	soilwarming_heated_10-20_052016_S40S43S46_119956	1	MGQKVNPIGFRLGVNRDWRSRWYASPQELPAFLHSDLEIRAYVKKKLQFAAVSKIVIERAWNSIRVTIYTARPGIVIGRKGAEIEKMTEEISKMATGKQIKIDIQEIKTPELDAQLVAENVALQIERRIAYRRAMKKAVQTAMDFGAQGIRLRSSGRLNGAEISRSEWYREGKVPLHTLRTPIDYGFAEANTVYGKIGVKCWICKKEEAPAETPAPSMPPPPPPEPQPAAA	1015
rpsC_lf.cluster1919	2	Ga0577639_0077028_306_1001	Ga0577639_0077028	1	MGQKINPIGLRLGINRTWDSRWYAGKNEYGQLLHEDVKIRKELMKDLKQAAVSRIIIERPHKKCRVTVQSARPGVVIGKKGADIEKLRKKVAQLTKSDVVINIVEIRKPELDAQLVAESIAQQLERRVAFRRAMKRAVQSAMRLGAGGIRINCSGRLGGAEIARMEWYREGRVPLHTLRADVDYGVATGFTTYGTCGVKVWIFKGEIMEHDPMAQDKKMAEGDQGRPRRDS	2851
rpsC_lf.cluster192	4	Ga0577620_0163729_534_1544	Ga0577620_0163729	1	VFRPWEANWFANPKDYTKMLHEDLEMRRVILARLRNAGIAKIETERSSNAQLTVTIHTAKPGIVIGKGGASVDQLREDLEKRFGNRVRISIQEIKQPELDAQLVAENIASQIERRISYKRAMKQAILRTMRSGAKGVRIYCGGRLRGAEMARREWDREGRVPLHTLRANIDFGRATASTTFGAIGVKCWIYKDVAVPLKRLAPIADGAPIAEVLAPQLESVEVLAEPEVAVIATAQPAEAVTAAETAAAPKRARVSASPADEAAAVEAKPRPSKAKVEAAAKPAPKAKVETVKPAPKPKAAVAAKAKTPAAKTASTPKAAAKAKPAAKPAAKKTKDK	1544
rpsC_lf.cluster1920	1	Ga0577615_0479327_583_1278	Ga0577615_0479327	1	MGQKVNPIGFRLSVNRDWRSRWYASPQELPGFLHSDLEIRAYVKKKLQFAAVSKIVIERAWNSIRVTIYTARPGIVIGRKGAEIEKMTEEISKMATGKQIKIDIQEIKTPELDAQLVAENVALQIERRIAYRRAMKKAVQTAMDFGAQGIRLRSSGRLNGAEISRSEWYREGKVPLHTLRTPIDYGFAEANTVYGKIGVKCWICKKEEAPAETPAPSMPPPPPPEPQPAPA	1365
rpsC_lf.cluster1921	1	soilwarming_1_unheated_80-90_052016_S33_14207_2	soilwarming_1_unheated_80-90_052016_S33_14207	1	MGQKVNPTGLRLGINRTWDSRWYAGKNEYGKLLHEDMEIRAALTKQLKQAAVSKIVIERPHKKCRVTIHSARPGVVIGKKGADIEKLRKAVAKLTDSDVVLNIIEIRKPELDARLVAESIAQQLERRVAFRRAMKRAVQSAMRLGAEGIRINCSGRLGGAEIARLEWYREGRVPLHTLRADVDYGVATAFTTYGTCGVKVWIFKGEILEHDPMAQDKRMAESEAGRPRRDS	1038
rpsC_lf.cluster1922	1	Ga0577626_0007810_8740_9435	Ga0577626_0007810	1	MIREFLEKETERAGFGGIQIQRTPMGTRVSILAERPGMIIGRKGSTINMLTESLNKRFKVENPQIEVVEAGRNANLNAQIMAIKLAEALERGWHFRRAGHSTVQRVMQSGAQGCQVIISGKLTGQRHRTEKFQSGHLKYCGDTKDKVMDLGFAVCKKKLGVMGCTVRIMRPDAVLPDNIAIGPEAMKIAADKAAAFAAPPPVADAPQERTGGRREERRPPRRREEGPRGAF	12821
[truncated: 11,040 more rows]

## Sheet: SuppTable6
Supplementary Table 6. Class level classification of species groups (rpsC clusters)
rpsC-gene-id-forcentroid	rpsC-cluster-id	class
Ga0577627_0104777_1504_2799	rpsC_lf.cluster0	d__Bacteria;p__Actinomycetota;c__Thermoleophilia
[truncated: 3,532 more rows]

## Sheet: SuppTable7
Supplementary Table 7. Species group coverage of reads from each sample normalized by sequencing yield per sample
[truncated: 3,534 more rows]
[truncated: 46 more columns]

[truncated: 12 more sheets: SuppTable8, SuppTable9, SuppTable10, SuppTable11, SuppTable12, SuppTable13, SuppTable14, SuppTable15, SuppTable16, SuppTable17, SuppTable18, SuppTable19]
